# Supplementary material for: Comparative analysis of long noncoding RNA and mRNA expression provides insights into adaptation to hypoxia in Tibetan sheep
Source: Sci Rep. 2022 Apr 21;12:6597. doi: 10.1038/s41598-022-08625-y (PMC9023463; doi:10.1038/s41598-022-08625-y)
Supplement: Supplementary file 11 — Supplementary Table S6. [file 41598_2022_8625_MOESM11_ESM.xlsx]

## Sheet: DE mRNA liver
Supplementary Table S6A.
#ID	L01	L02	L03	L13	L14	L15	FDR	log2FC	regulated		#ID	L04	L05	L06	L13	L14	L15	FDR	log2FC	regulated		#ID	L07	L08	L09	L13	L14	L15	FDR	log2FC	regulated		#ID	L10	L12	L13	L14	L15	FDR	log2FC	regulated
ENSOARG00000000058	55.4693	26.8041	0.858286	0	0	0.125026	0.000334278	-9.4574	down		ENSOARG00000000049	0	0	0	0.0951793	0.0452322	0.0412784	0.00184883	Inf	up		ENSOARG00000000049	0	0	0	0.0951793	0.0452322	0.0412784	0.00169418	Inf	up		ENSOARG00000000049	0	0	0.0951793	0.0452322	0.0412784	0.012005	Inf	up
ENSOARG00000000076	1.12993	1.24581	1.2464	0.33252	0.444175	0	2.35754e-05	-2.34093	down		ENSOARG00000000063	0.0186571	0.0220907	0.0711879	0.062854	0.345167	0.236246	0.0446224	2.38505	up		ENSOARG00000000083	334.934	302.076	314.793	84.998	172.543	121.959	2.92006e-08	-1.37785	down		ENSOARG00000000058	39.1333	1.85915	0	0	0.125026	0.0136064	-8.9702	down
ENSOARG00000000145	1.53447	3.0484	4.01152	6.9777	10.0716	4.91256	0.00746777	1.22473	up		ENSOARG00000000076	0.52019	0.379029	0.865183	0.33252	0.444175	0	0.0455509	-1.32639	down		ENSOARG00000000122	0.077832	0.100762	0.183657	0.442604	0.186777	0.347718	0.0380051	1.40803	up		ENSOARG00000000083	429.022	301.208	84.998	172.543	121.959	1.76425e-05	-1.56362	down
ENSOARG00000000180	0.391081	0.741494	0.504207	0.0114386	0.011778	0.182724	0.000184612	-3.11027	down		ENSOARG00000000097	15.0552	15.5665	23.4995	4.62544	6.06512	3.97381	2.40247e-09	-2.02109	down		ENSOARG00000000155	0.809832	0.668426	0.829479	0.958999	1.80683	2.991	0.043746	1.27073	up		ENSOARG00000000145	4.09487	2.11098	6.9777	10.0716	4.91256	0.0257411	1.20874	up
ENSOARG00000000193	8.58759	8.97149	5.41698	1.58122	2.3718	1.51794	1.04045e-08	-2.1866	down		ENSOARG00000000142	148.44	194.395	293.58	117.942	126.681	83.1074	0.00477002	-1.08353	down		ENSOARG00000000193	5.84945	5.25909	5.8167	1.58122	2.3718	1.51794	8.85107e-13	-1.67562	down		ENSOARG00000000177	4.95403	4.73594	1.39363	2.25385	1.49459	3.23582e-06	-1.52952	down
ENSOARG00000000200	0.0170256	0.0153954	0	0.308745	0.190743	0.493198	0.00013725	4.84111	up		ENSOARG00000000145	1.35161	2.75615	2.88897	6.9777	10.0716	4.91256	0.00058816	1.52665	up		ENSOARG00000000200	0.0331187	0	0.0355223	0.308745	0.190743	0.493198	0.000394225	3.82025	up		ENSOARG00000000193	3.82705	5.15033	1.58122	2.3718	1.51794	6.2702e-06	-1.32807	down
ENSOARG00000000235	0	0.0298755	0.0322066	0.119827	1.38805	0.619283	0.0118453	4.92668	up		ENSOARG00000000177	4.65385	4.08082	4.94112	1.39363	2.25385	1.49459	9.89248e-08	-1.56143	down		ENSOARG00000000208	0.121659	0.190385	0.111847	0.405055	0.367024	0.867803	0.0138005	1.91249	up		ENSOARG00000000200	0.0338831	0.0179752	0.308745	0.190743	0.493198	0.00398662	3.65632	up
ENSOARG00000000269	10.4758	18.7228	10.2906	5.91505	5.02018	7.9073	0.0174474	-1.18576	down		ENSOARG00000000193	3.28425	5.37564	7.06189	1.58122	2.3718	1.51794	0.000147177	-1.65054	down		ENSOARG00000000235	0	0.0320008	0.206798	0.119827	1.38805	0.619283	0.0496148	3.09104	up		ENSOARG00000000317	1.68174	1.84963	0.330155	0.352779	0.362916	9.49433e-08	-2.36336	down
ENSOARG00000000317	2.26032	6.36155	6.69051	0.330155	0.352779	0.362916	1.23069e-05	-3.99958	down		ENSOARG00000000200	0	0.0976605	0.104905	0.308745	0.190743	0.493198	0.014972	2.2142	up		ENSOARG00000000317	1.22283	1.55047	0.408524	0.330155	0.352779	0.362916	0.0234715	-1.6473	down		ENSOARG00000000433	0.992482	0.658147	1.94688	3.10396	2.96247	0.000419368	1.66421	up
ENSOARG00000000337	2.69265	3.95244	2.17537	2.1739	1.31434	1.24659	0.0205877	-1.0053	down		ENSOARG00000000235	0.0533529	0.0315858	0.0339288	0.119827	1.38805	0.619283	0.024246	3.97156	up		ENSOARG00000000432	1.66513	0.939659	1.19065	2.89763	2.55737	6.17491	0.020413	1.5756	up		ENSOARG00000000532	0.210862	0.370306	0.801683	0.63445	0.91518	0.0119956	1.41398	up
ENSOARG00000000355	0.0663689	0.0300071	0.0485228	0.210621	0.185888	0.296869	0.0406911	2.16832	up		ENSOARG00000000248	1.35455	1.41712	0.884544	3.7097	2.61352	5.21814	0.000998631	1.51834	up		ENSOARG00000000433	1.36082	1.05999	1.0405	1.94688	3.10396	2.96247	0.00206883	1.16347	up		ENSOARG00000000570	7.91615	17.2485	4.22781	5.23433	5.13415	0.0282066	-1.39509	down
ENSOARG00000000406	0.055692	0.184652	0.126675	0.0168322	0	0	0.00674552	-4.52824	down		ENSOARG00000000317	4.09385	1.20853	1.58744	0.330155	0.352779	0.362916	0.0172344	-2.90395	down		ENSOARG00000000450	1.96834	0.70006	1.50799	3.34225	2.42923	4.74167	0.0408797	1.29559	up		ENSOARG00000000591	0.245016	0.275721	0.108248	0.104493	0.0127145	0.0235668	-1.8119	down
ENSOARG00000000461	3.71005	2.23351	3.35452	1.036	1.3993	1.13096	5.59454e-07	-1.48653	down		ENSOARG00000000337	2.38756	4.29037	2.37376	2.1739	1.31434	1.24659	0.0110748	-1.05128	down		ENSOARG00000000475	0	0	0	0.0543993	0.0560132	0.0851949	0.0322974	Inf	up		ENSOARG00000000603	5.64117	5.04029	12.1531	13.1691	10.0491	5.84841e-05	1.11931	up
ENSOARG00000000530	2.10509	3.78038	1.53426	3.91553	6.20827	6.57074	0.00805536	1.04147	up		ENSOARG00000000403	0.00415705	0.339624	0.30137	0.0606869	0.00480672	0.00438656	0.0327926	-3.24919	down		ENSOARG00000000485	1.07044	1.2382	1.39542	0.391487	1.11446	0.375079	0.011531	-1.03534	down		ENSOARG00000000689	2.60112	2.22566	0	1.33833	0.0718435	0.00710896	-2.43122	down
ENSOARG00000000545	10.318	5.87975	9.41727	2.66928	6.73776	4.35895	0.00528986	-1.00907	down		ENSOARG00000000450	1.86746	0.552785	0.964908	3.34225	2.42923	4.74167	0.0285838	1.462	up		ENSOARG00000000571	0.135364	0.143227	0.00907426	0.00788699	0.00812098	0.00741111	0.0175695	-3.66128	down		ENSOARG00000000819	0.17068	0.226367	0.933149	0.740643	0.529761	0.0340378	1.87122	up
ENSOARG00000000581	3.13148	2.77415	1.55729	0.266639	0.25971	1.69291	0.00285749	-1.85199	down		ENSOARG00000000476	2.28884	1.57297	0.407145	3.3252	3.2943	5.84378	0.0156068	1.3752	up		ENSOARG00000000660	2.84221	2.47018	0	3.99852	6.39894	4.34574	0.00709047	1.42138	up		ENSOARG00000000829	3.81154	2.05492	9.58634	7.64656	5.49895	0.00570192	1.35143	up
ENSOARG00000000722	380.298	434.542	381.153	255.748	253.141	120.707	0.00217273	-1.03739	down		ENSOARG00000000532	0.377599	0.307374	0.150079	0.801683	0.63445	0.91518	0.00850679	1.33958	up		ENSOARG00000000829	2.66922	2.77503	2.87512	9.58634	7.64656	5.49895	0.000130716	1.41635	up		ENSOARG00000000856	0	0	0.386611	0.895683	0.817389	0.0184466	Inf	up
ENSOARG00000000742	1.93007	2.30992	1.41504	0.522064	0.32556	0.393833	2.88297e-07	-2.29146	down		ENSOARG00000000591	0.463899	0.442271	0.137926	0.108248	0.104493	0.0127145	0.00485554	-2.36428	down		ENSOARG00000000857	8.7398	18.9638	4.49651	47.0308	29.8059	62.6794	0.000255072	2.08103	up		ENSOARG00000000857	5.67023	26.9957	47.0308	29.8059	62.6794	0.024146	1.49572	up
ENSOARG00000000786	0.190003	0.197264	0.212656	0.835865	0.519026	0.31777	0.0294759	1.37887	up		ENSOARG00000000623	0	0	0	0.193306	0.119424	0.254299	0.0135699	Inf	up		ENSOARG00000000888	4.54416	5.64848	2.77008	5.16577	10.2144	12.801	0.0305897	1.07008	up		ENSOARG00000000912	0.96909	1.40965	0.484249	0.498616	0.347965	0.0204083	-1.44421	down
ENSOARG00000000846	4.93877	3.9178	3.85149	9.7499	8.57206	10.6726	0.00180043	1.08913	up		ENSOARG00000000641	3.30328	2.85579	1.33375	3.82723	7.69967	10.0697	0.0189222	1.36205	up		ENSOARG00000000917	1.23312	1.68042	2.36678	3.53943	4.98385	3.72384	0.00898972	1.17026	up		ENSOARG00000000913	0.285369	0.242224	0.121348	0.0178497	0.0162894	0.0327946	-2.33395	down
ENSOARG00000000888	2.03354	3.05458	2.06423	5.16577	10.2144	12.801	0.000891923	1.85231	up		ENSOARG00000000660	2.10209	2.38735	1.63688	3.99852	6.39894	4.34574	0.0320793	1.11853	up		ENSOARG00000000972	2.16717	3.3166	3.81141	6.07581	6.25607	9.22687	0.000201624	1.17486	up		ENSOARG00000000972	2.07046	2.26597	6.07581	6.25607	9.22687	1.40176e-05	1.70614	up
ENSOARG00000000918	16.8787	8.51372	11.035	4.31799	5.39363	6.11944	0.000718216	-1.2991	down		ENSOARG00000000722	345.9	462.644	380.308	255.748	253.141	120.707	0.00174667	-1.0484	down		ENSOARG00000001015	0.921699	1.24891	0.761702	0.558744	0.435116	0.300017	0.00109716	-1.21409	down		ENSOARG00000000985	36.9208	75.2739	25.6402	26.1991	24.4246	0.033442	-1.16291	down
ENSOARG00000000928	0.66427	0.38831	0.425151	1.21069	1.40321	1.82365	0.000641919	1.48831	up		ENSOARG00000000738	199.217	114.019	147.268	121.11	92.6923	23.5487	0.0320278	-1.1061	down		ENSOARG00000001052	6.82598	5.132	5.72134	9.80505	12.7718	15.8001	4.75373e-05	1.07401	up		ENSOARG00000001015	0.984195	1.84793	0.558744	0.435116	0.300017	0.00320459	-1.73042	down
ENSOARG00000000942	3.82397	3.69537	2.11075	4.74661	8.2158	9.72614	0.00580123	1.12228	up		ENSOARG00000000762	1.36298	0.915945	1.78037	3.76439	3.6631	3.14854	0.0251896	1.23946	up		ENSOARG00000001067	0.285451	0.074807	0.27394	0.0490201	0.0504744	0.039482	0.00886499	-2.22965	down		ENSOARG00000001052	6.81395	5.72486	9.80505	12.7718	15.8001	0.00147082	1.00234	up
ENSOARG00000000985	40.9585	65.4348	68.0967	25.6402	26.1991	24.4246	0.000183916	-1.31255	down		ENSOARG00000000819	0.19043	0.143485	0.242201	0.933149	0.740643	0.529761	0.0178612	1.79892	up		ENSOARG00000001090	1.79068	3.08864	3.65299	8.20489	15.3912	18.4749	2.08737e-05	2.25466	up		ENSOARG00000001090	1.76017	2.99826	8.20489	15.3912	18.4749	0.000114261	2.52878	up
ENSOARG00000001015	1.35674	0.552545	0.837963	0.558744	0.435116	0.300017	0.01923	-1.1713	down		ENSOARG00000000839	1.4983	1.67376	1.48308	3.48212	3.06193	3.95255	6.36025e-05	1.03733	up		ENSOARG00000001111	9.87357	7.47507	12.3614	4.81219	4.42289	1.84111	6.51449e-05	-1.45902	down		ENSOARG00000001111	11.3892	37.2552	4.81219	4.42289	1.84111	0.0230395	-2.73714	down
ENSOARG00000001052	5.36045	3.89457	6.04095	9.80505	12.7718	15.8001	4.55668e-05	1.22036	up		ENSOARG00000000856	0	0	0	0.386611	0.895683	0.817389	0.0033282	Inf	up		ENSOARG00000001143	0.470995	0.625387	0.757766	1.53678	2.78799	1.58158	0.0466097	1.6229	up		ENSOARG00000001194	0.0737549	0.365189	0.784071	0.991867	1.55773	0.00508181	2.31635	up
ENSOARG00000001090	2.71953	2.97056	2.04106	8.20489	15.3912	18.4749	1.50122e-05	2.32575	up		ENSOARG00000000857	24.8336	5.51757	16.3551	47.0308	29.8059	62.6794	0.0114567	1.40976	up		ENSOARG00000001239	0.0108441	0.0287975	0.0348933	0.0606557	0.12838	0.0728281	0.0342514	1.76295	up		ENSOARG00000001288	0.0608856	0.0143556	0.110959	0.215807	0.231697	0.0213518	2.27286	up
ENSOARG00000001111	3.70443	12.7977	16.3542	4.81219	4.42289	1.84111	0.039916	-1.69532	down		ENSOARG00000000888	2.94462	4.27381	2.08831	5.16577	10.2144	12.801	0.00583878	1.45412	up		ENSOARG00000001285	0	0	0	0.0969577	0	0.0759229	0.0467624	Inf	up		ENSOARG00000001328	5.03612	3.2442	0.655565	1.35414	1.46866	4.24201e-05	-1.86975	down
ENSOARG00000001138	0.571648	1.31929	0.324369	2.39046	10.2518	18.217	0.00808245	3.65996	up		ENSOARG00000000962	0.00843972	0.0499646	0.182481	0.293803	0.283002	0.249359	0.0311427	1.68281	up		ENSOARG00000001288	0.0396747	0.006585	0.0141847	0.110959	0.215807	0.231697	0.000510802	3.15502	up		ENSOARG00000001371	11.7481	6.66205	41.9078	31.1588	21.4875	0.0031192	1.75954	up
ENSOARG00000001143	1.53348	0.0729815	0	1.53678	2.78799	1.58158	0.0410157	1.82123	up		ENSOARG00000000985	58.4922	53.215	44.8805	25.6402	26.1991	24.4246	1.90866e-07	-1.18418	down		ENSOARG00000001356	1.87958	0.286392	6.57675	9.5941	7.41399	11.1566	0.00185836	1.65605	up		ENSOARG00000001433	0.723722	0.246818	0.0942087	0.194007	0.0885244	0.0493521	-1.98692	down
ENSOARG00000001169	1.9074	1.51641	0.0249577	0.0232142	0	0	0.000469842	-7.26373	down		ENSOARG00000001021	0.365665	0.173184	0.325553	0.0615944	0.126844	0.0192926	0.0275929	-2.22883	down		ENSOARG00000001365	0	0	0.074135	0	1.1279	0.90821	0.0134893	4.71758	up		ENSOARG00000001492	1.0212	1.03426	1.40989	2.4534	3.12658	0.0273675	1.15061	up
ENSOARG00000001194	0.568259	0.17873	0.361268	0.784071	0.991867	1.55773	0.0384118	1.50024	up		ENSOARG00000001052	5.11624	4.01385	5.44119	9.80505	12.7718	15.8001	8.11877e-06	1.24886	up		ENSOARG00000001371	5.79922	13.7407	7.0776	41.9078	31.1588	21.4875	0.000480227	1.7968	up		ENSOARG00000001574	1.75598	2.66309	0.455007	0.539869	0.671061	9.79533e-07	-2.01656	down
ENSOARG00000001207	0.162191	0.488871	0	0.735301	0.588868	0.829122	0.0387423	1.59246	up		ENSOARG00000001067	0.199554	0.287964	0.0634512	0.0490201	0.0504744	0.039482	0.0152169	-2.12764	down		ENSOARG00000001373	6.8215	0.256239	8.05866	13.2996	13.749	9.35655	0.0109944	1.22733	up		ENSOARG00000001626	5.08779	6.54129	16.4883	12.5479	11.0067	0.00119293	1.18292	up
ENSOARG00000001226	3.88863	2.03638	1.71027	1.09219	1.35684	1.28286	0.0217624	-1.1283	down		ENSOARG00000001090	2.94395	4.54412	2.4097	8.20489	15.3912	18.4749	0.000140311	1.94681	up		ENSOARG00000001402	2.11378	2.33007	2.56663	1.23934	1.25059	0.87342	0.00450075	-1.09789	down		ENSOARG00000001725	6.38964	9.33071	13.0619	16.8413	19.2996	0.000150722	1.0356	up
ENSOARG00000001285	0	0	0	0.0969577	0	0.0759229	0.0472623	Inf	up		ENSOARG00000001111	11.9259	6.67437	9.27884	4.81219	4.42289	1.84111	0.00167794	-1.48568	down		ENSOARG00000001404	0.287526	0.138828	0.0186905	0.00812251	0	0.0228973	0.0325593	-3.87539	down		ENSOARG00000001766	20.2137	11.7444	36.9313	37.0641	37.0933	2.91546e-05	1.18981	up
ENSOARG00000001313	0.787712	0.284916	0.537509	0.190461	0.147084	0.156598	0.0477941	-1.78828	down		ENSOARG00000001124	8.61021	11.6468	14.3027	28.4795	18.6144	28.1102	0.00086675	1.00149	up		ENSOARG00000001492	1.25527	0.542193	0.63263	1.40989	2.4534	3.12658	0.00334132	1.47459	up		ENSOARG00000001783	5.09421	6.25338	1.38956	0.773399	2.09621	9.54515e-10	-2.01346	down
ENSOARG00000001328	4.02507	3.0417	8.74126	0.655565	1.35414	1.46866	0.00905131	-2.30099	down		ENSOARG00000001129	0.0375299	0.0571328	0.0340949	0	0.0185979	0.0141435	0.0363233	-2.13642	down		ENSOARG00000001504	3.17541	3.88746	3.89406	7.80246	8.06993	9.03443	1.78979e-07	1.14534	up		ENSOARG00000001842	0.401782	1.03529	0.104602	0.0897546	0.0163818	0.00280088	-3.3699	down
ENSOARG00000001335	1.86718	1.40119	1.12586	0.296709	1.03335	0.820019	0.0149892	-1.14977	down		ENSOARG00000001138	1.10224	3.02618	0.788568	2.39046	10.2518	18.217	0.0373058	2.51895	up		ENSOARG00000001553	0.396382	0.243808	0.0375132	0	0	0	0.000851763	#NAME?	down		ENSOARG00000001851	0.631936	0.853352	0.179478	0.177103	0.512973	0.0211299	-1.37992	down
ENSOARG00000001365	0.106597	0.0642604	0	0	1.1279	0.90821	0.0366822	3.45733	up		ENSOARG00000001271	3.54157	4.52939	3.23311	9.86643	7.84766	9.53154	7.36779e-05	1.13759	up		ENSOARG00000001594	0.847743	0.501519	0.333098	0.14867	0.314219	0.16911	0.0192515	-1.46717	down		ENSOARG00000001881	16.4854	10.726	36.967	26.905	25.8827	0.00314555	1.12047	up
ENSOARG00000001450	0.0293743	0.0265617	0.257709	0.26634	0.740452	1.12621	0.0104863	2.64211	up		ENSOARG00000001274	0.438622	0.583643	0.73851	1.41669	1.52634	1.16371	0.0019505	1.09369	up		ENSOARG00000001682	0	0	0	0.0420364	0.0360696	0	0.0453953	Inf	up		ENSOARG00000001890	56.2293	143.006	28.1212	18.2203	18.53	0.0137275	-2.21595	down
ENSOARG00000001456	0.684912	0.447825	1.04771	0.143312	0.383665	0.215463	0.00936056	-1.67432	down		ENSOARG00000001285	0	0	0	0.0969577	0	0.0759229	0.0464245	Inf	up		ENSOARG00000001691	8.36574	4.56466	5.90843	12.072	19.0201	34.2468	0.0119938	1.74723	up		ENSOARG00000001906	104.902	175.967	65.8341	26.5817	21.2557	0.00126323	-1.89221	down
ENSOARG00000001492	1.5083	0.492123	0.530523	1.40989	2.4534	3.12658	0.0108189	1.37687	up		ENSOARG00000001288	0.0658725	0.0064996	0.0139635	0.110959	0.215807	0.231697	0.00466721	2.47326	up		ENSOARG00000001748	1.79921	3.1434	2.4884	0.853358	0.924124	0.428585	3.31021e-05	-1.79115	down		ENSOARG00000001917	0.199029	0.462566	1.68402	1.35162	1.14421	0.000127495	2.05842	up
ENSOARG00000001522	0.882723	0.846579	0.61929	1.39459	1.97914	1.81753	0.00989818	1.03166	up		ENSOARG00000001365	0	0	0.0729788	0	1.1279	0.90821	0.0133537	4.67767	up		ENSOARG00000001756	7.57484	2.8437	2.99265	6.77707	10.8595	15.7342	0.0241296	1.26609	up		ENSOARG00000001926	0.256089	0.184377	0.891732	0.772308	0.328906	0.0400991	1.57459	up
ENSOARG00000001574	1.41906	2.07954	1.90813	0.455007	0.539869	0.671061	1.0936e-07	-1.81729	down		ENSOARG00000001373	3.82117	6.27233	0.434684	13.2996	13.749	9.35655	0.000169256	1.6509	up		ENSOARG00000001783	4.8826	8.93835	9.60108	1.38956	0.773399	2.09621	9.61914e-07	-2.49034	down		ENSOARG00000001931	0.334518	0.118309	0	0	0	0.0165842	#NAME?	down
ENSOARG00000001575	0.853486	0.684396	0.251166	1.29951	1.47337	2.0992	0.0168471	1.34332	up		ENSOARG00000001404	0	0.171284	0.285184	0.00812251	0	0.0228973	0.042264	-3.95416	down		ENSOARG00000001815	1.20461	1.07453	0.955244	1.1283	2.67428	3.29569	0.0405988	1.08197	up		ENSOARG00000001956	1.80048	1.3467	4.45625	3.22638	3.0763	0.00178236	1.17244	up
ENSOARG00000001633	2.76892	2.0779	1.82264	0.569417	2.03876	0.863392	0.0208443	-1.06562	down		ENSOARG00000001470	1.49786	1.28983	2.16486	4.43449	4.48733	6.25038	0.0156178	1.4779	up		ENSOARG00000001830	0.0834322	0.0138477	0.0447437	0.298152	0.507214	0.0609049	0.0422851	2.5566	up		ENSOARG00000002027	0.254891	0.270442	3.63872	1.9132	4.07391	0.000353926	3.59783	up
ENSOARG00000001684	43.8876	26.5487	44.0587	72.462	123.604	115.395	1.56314e-05	1.33604	up		ENSOARG00000001497	0.521413	0.715365	0.778956	1.28259	2.14364	1.71173	0.0036065	1.21335	up		ENSOARG00000001851	0.938552	0.599139	1.33362	0.179478	0.177103	0.512973	0.00289075	-1.76314	down		ENSOARG00000002036	37.1136	39.853	11.7865	13.8633	7.07118	3.93482e-09	-1.84334	down
ENSOARG00000001694	0.927889	1.2924	0.269896	9.1664	5.46321	4.67963	1.82688e-05	2.8488	up		ENSOARG00000001516	44.0581	21.0319	34.452	19.1022	11.6056	20.3883	0.0249512	-1.11417	down		ENSOARG00000001869	0.0201403	0.0601701	0.0432039	0.0563267	0.328654	0.317568	0.0285364	2.44906	up		ENSOARG00000002037	0.159257	0.439331	0.0290232	0.0298843	0	0.00781074	-3.94927	down
ENSOARG00000001725	6.7255	7.0824	4.83471	13.0619	16.8413	19.2996	9.79725e-07	1.28737	up		ENSOARG00000001553	0	0.229187	0.467756	0	0	0	0.0076776	#NAME?	down		ENSOARG00000001906	213.991	115.523	113.412	65.8341	26.5817	21.2557	0.000780439	-1.98406	down		ENSOARG00000002178	0.399617	0.439701	0.0404593	0.0694328	0.177418	0.0167463	-2.16005	down
ENSOARG00000001743	0.292452	0.24041	0.285086	0.843722	0.695003	1.08729	0.047537	1.58137	up		ENSOARG00000001639	0.0369765	0	0.0282174	0.0996561	0.342042	0.0858395	0.0410116	2.81063	up		ENSOARG00000001917	0.305703	0.285984	0.158977	1.68402	1.35162	1.14421	3.84943e-07	2.44127	up		ENSOARG00000002199	0.540476	0.338857	2.59674	0.691496	2.35592	0.0420223	2.09195	up
ENSOARG00000001773	0	0	0.0170682	0.285765	0.326937	0.0596717	0.00110447	5.18046	up		ENSOARG00000001663	0.0249423	0.00984417	0.0317232	0.102701	0.27879	0.0614118	0.0423721	2.56515	up		ENSOARG00000001969	0	0	0	0.127485	0.0238669	0.0653418	0.00772794	Inf	up		ENSOARG00000002203	67.3455	44.751	25.8502	23.6858	24.5217	0.000262912	-1.20385	down
ENSOARG00000001783	2.2201	4.12741	3.69848	1.38956	0.773399	2.09621	0.00447899	-1.35087	down		ENSOARG00000001725	5.56678	5.95313	10.117	13.0619	16.8413	19.2996	5.39328e-05	1.05159	up		ENSOARG00000002022	80.4624	165.601	114.639	11.9768	66.2503	45.4245	0.0029773	-1.60622	down		ENSOARG00000002241	2.68792	4.34883	1.71409	1.47753	1.56264	0.00233812	-1.16906	down
ENSOARG00000001842	1.42283	0.347728	0.43109	0.104602	0.0897546	0.0163818	0.0127898	-3.45818	down		ENSOARG00000001737	0.351542	0.73337	0.872934	0.319575	0.174206	0.211971	0.0349841	-1.57642	down		ENSOARG00000002036	36.6654	29.1524	25.6091	11.7865	13.8633	7.07118	3.19929e-08	-1.52491	down		ENSOARG00000002283	0	0	0.140696	0.02634	0.156244	0.012219	Inf	up
ENSOARG00000001872	66.9807	81.1178	139.748	40.8649	32.7069	28.35	0.00301321	-1.60717	down		ENSOARG00000001783	4.26737	3.05697	2.45854	1.38956	0.773399	2.09621	0.0052919	-1.34907	down		ENSOARG00000002076	0.0744656	0.0370783	0.0798699	0	0	0	0.0227853	#NAME?	down		ENSOARG00000002310	0.671783	0.637741	0.0644352	0.331735	0.121095	0.0465488	-1.97369	down
ENSOARG00000001875	0.0105799	0.00956686	0	0.383715	0.03951	0.162253	0.0192216	4.7887	up		ENSOARG00000001790	0.0521113	0.102836	0.162014	0.344613	0.354837	0.256612	0.0273146	1.47867	up		ENSOARG00000002118	0.0476145	0.128703	0.0656616	0	0	0.0238342	0.00543615	-3.38681	down		ENSOARG00000002415	0.39848	0.45411	0.712748	1.27393	0.79611	0.0364294	1.08972	up
ENSOARG00000001906	53.2958	71.9652	87.86	65.8341	26.5817	21.2557	0.0347075	-1.00468	down		ENSOARG00000001834	0.401349	0.672249	0.336157	1.51699	0.611217	2.2105	0.0416082	1.50259	up		ENSOARG00000002133	0	0	0	0.105331	0.151838	0.0395902	0.0158139	Inf	up		ENSOARG00000002419	9.88068	68.5575	1.53404	0.188042	0.446172	0.0134661	-5.74849	down
ENSOARG00000001917	0.371458	0.318666	0.343532	1.68402	1.35162	1.14421	0.000259375	1.91423	up		ENSOARG00000001842	0.683086	0.0551452	0.592358	0.104602	0.0897546	0.0163818	0.0319042	-2.8276	down		ENSOARG00000002160	0	0	0	0.0467817	0.289018	0.131877	0.0414372	Inf	up		ENSOARG00000002469	0.199001	1.26685	5.07727	77.8584	42.8531	0.00761418	5.78798	up
ENSOARG00000002007	6.39671	4.22207	3.20427	13.5008	12.4018	12.0417	1.37684e-07	1.36075	up		ENSOARG00000001917	0.515255	0.154796	0.322776	1.68402	1.35162	1.14421	6.62681e-05	1.90606	up		ENSOARG00000002199	0.0720386	0.0956527	0.206045	2.59674	0.691496	2.35592	0.000226795	3.89716	up		ENSOARG00000002528	0.948794	0.657425	2.91124	2.03474	2.68584	0.00239721	1.64695	up
ENSOARG00000002022	287.394	261.842	339.064	11.9768	66.2503	45.4245	1.00153e-18	-2.97461	down		ENSOARG00000001969	0	0	0	0.127485	0.0238669	0.0653418	0.00760938	Inf	up		ENSOARG00000002224	0	0.0175811	0.0189357	0.0329163	0.076259	0.123721	0.0351519	2.62675	up		ENSOARG00000002538	2.89454	2.46756	5.56092	5.76122	5.30418	0.00035843	1.02505	up
ENSOARG00000002027	0.683081	0.926515	0.998812	3.63872	1.9132	4.07391	0.0231899	1.7783	up		ENSOARG00000002022	118.854	212.182	243.515	11.9768	66.2503	45.4245	7.99286e-07	-2.35855	down		ENSOARG00000002243	0.0880455	0.0472123	0.0363213	0.107335	0.169029	0.332239	0.0283611	1.77849	up		ENSOARG00000002570	11.2435	7.97213	1.96319	3.6951	1.64638	2.70964e-07	-2.01456	down
ENSOARG00000002032	0	0	0	0.143373	0.0922667	0.252604	0.00132101	Inf	up		ENSOARG00000002027	0.482595	1.71423	0.35074	3.63872	1.9132	4.07391	0.0141882	1.81672	up		ENSOARG00000002263	0.487892	0.691992	0.586731	0.220524	0.141917	0.259023	0.0270344	-1.53986	down		ENSOARG00000002590	0.126332	0.804237	0.786616	6.38086	9.41069	0.0373672	3.53149	up
ENSOARG00000002036	17.9989	29.522	14.0851	11.7865	13.8633	7.07118	0.0422676	-1.03601	down		ENSOARG00000002037	0.361832	0.0306015	1.1505	0.0290232	0.0298843	0	0.0468071	-4.84206	down		ENSOARG00000002283	0	0	0	0.140696	0.02634	0.156244	0.00154034	Inf	up		ENSOARG00000002626	0.601893	0.423572	1.16406	1.11216	1.03072	0.0190655	1.08286	up
ENSOARG00000002199	0.0987557	0.22325	0.120335	2.59674	0.691496	2.35592	0.000500689	3.56535	up		ENSOARG00000002178	0.252203	0.284397	0.442965	0.0404593	0.0694328	0.177418	0.0280131	-1.90507	down		ENSOARG00000002316	1.20215	0.445752	0.315491	0.238445	0.147312	0.0112029	0.0396274	-2.33473	down		ENSOARG00000002655	1.21999	2.21189	4.94139	6.64773	12.2308	0.00884501	2.18453	up
ENSOARG00000002224	0	0.00820675	0	0.0329163	0.076259	0.123721	0.00480644	4.65022	up		ENSOARG00000002197	2.8269	8.36084	7.08554	0.743817	4.99193	0.48676	0.0264402	-1.69796	down		ENSOARG00000002374	2.1484	2.38634	2.80654	4.18538	7.37648	6.00784	0.00102328	1.21096	up		ENSOARG00000002677	0.527041	0.149119	0	0	0	0.00393204	#NAME?	down
ENSOARG00000002252	2.62632	4.06855	5.27911	1.43987	2.09082	0.43365	0.00108285	-1.72145	down		ENSOARG00000002199	0.0398689	0.0944123	0.684555	2.59674	0.691496	2.35592	0.00417709	2.70169	up		ENSOARG00000002415	0.324575	0.581811	0.224351	0.712748	1.27393	0.79611	0.00627408	1.24937	up		ENSOARG00000002701	1.24028	1.34309	3.50698	1.90749	2.5728	0.0342037	1.03235	up
ENSOARG00000002283	0	0	0	0.140696	0.02634	0.156244	0.00182962	Inf	up		ENSOARG00000002208	0.296962	0.376728	0.45863	1.12747	0.760324	0.872924	0.0179013	1.16372	up		ENSOARG00000002419	14.3789	3.74563	8.29956	1.53404	0.188042	0.446172	0.000770482	-3.61518	down		ENSOARG00000002703	2.0389	1.7995	0.368225	0.407873	0.361734	1.13576e-08	-2.3629	down
ENSOARG00000002376	0	0.0103171	0.0444888	0.196559	0.0745649	0.09721	0.0281765	2.63999	up		ENSOARG00000002234	0.703867	0.594311	0.909897	2.03435	1.70112	1.49763	0.00240048	1.10925	up		ENSOARG00000002432	0	0	0	0.00810965	0.0668021	0.0381017	0.0160409	Inf	up		ENSOARG00000002754	0.485484	1.83646	0.134637	0.198044	0.10844	0.0317422	-3.00808	down
ENSOARG00000002518	0.0330711	0.0897138	0	0.419803	0.185253	0.535357	0.0125254	3.09206	up		ENSOARG00000002243	0.0112449	0.086543	0.0357548	0.107335	0.169029	0.332239	0.0177937	2.08827	up		ENSOARG00000002516	0.419531	0.53586	0.704314	0.595157	1.47951	1.486	0.0305471	1.04976	up		ENSOARG00000002793	0.0221475	0.0234987	0.100905	0.498713	0.398229	0.0107535	3.82219	up
ENSOARG00000002590	0.232757	1.14802	0.598175	0.786616	6.38086	9.41069	0.0268382	2.91254	up		ENSOARG00000002283	0	0	0	0.140696	0.02634	0.156244	0.00158188	Inf	up		ENSOARG00000002528	0.7192	1.56436	1.01499	2.91124	2.03474	2.68584	0.00762275	1.17771	up		ENSOARG00000002816	0.417364	0.291864	0.0691464	0.0622982	0.0649743	0.00334734	-2.45778	down
ENSOARG00000002632	0.348465	0.402628	0.415173	0.122872	0.144592	0.0989643	0.0478112	-1.78536	down		ENSOARG00000002316	0.265419	0.402259	0.472607	0.238445	0.147312	0.0112029	0.0296596	-1.6332	down		ENSOARG00000002538	2.772	2.38184	2.75392	5.56092	5.76122	5.30418	3.7599e-06	1.03247	up		ENSOARG00000002857	0	0	0.0954892	0.0614514	0.0448638	0.0374184	Inf	up
ENSOARG00000002640	0.567828	0.176906	0.358163	0.960487	0.690506	0.756177	0.0230178	1.046	up		ENSOARG00000002374	1.94357	3.05931	2.64644	4.18538	7.37648	6.00784	0.0053331	1.06411	up		ENSOARG00000002570	8.21222	6.23132	11.2936	1.96319	3.6951	1.64638	1.49842e-05	-1.86692	down		ENSOARG00000002895	0.231759	0.399586	1.90063	1.06911	1.12449	0.00166779	2.1021	up
ENSOARG00000002655	0.262722	0.109646	0.308639	4.94139	6.64773	12.2308	8.22278e-08	5.03002	up		ENSOARG00000002376	0	0.0218156	0.0351507	0.196559	0.0745649	0.09721	0.0238721	2.62361	up		ENSOARG00000002590	0.843792	0.676331	0.706365	0.786616	6.38086	9.41069	0.0272513	2.83748	up		ENSOARG00000002909	0.317952	0.234679	0.932145	1.02465	0.544479	0.0292679	1.56974	up
ENSOARG00000002665	16.7024	23.7415	42.4165	10.003	12.6878	14.3093	0.0350039	-1.28244	down		ENSOARG00000002386	13.161	25.6812	32.6893	12.2996	11.3694	11.5617	0.011661	-1.1365	down		ENSOARG00000002655	1.04832	1.74212	1.11737	4.94139	6.64773	12.2308	0.000445333	2.56385	up		ENSOARG00000002926	0.187827	0.348752	0.805829	0.770994	0.582982	0.0194138	1.40443	up
ENSOARG00000002677	0.0353103	0.766306	0.275367	0	0	0	0.020047	#NAME?	down		ENSOARG00000002414	0.157601	0.248806	0.334078	0	0	0	0.0139965	#NAME?	down		ENSOARG00000002677	0.583837	0	0.663045	0	0	0	0.00481842	#NAME?	down		ENSOARG00000002927	12.6927	11.0404	21.142	29.7233	30.1839	2.18204e-05	1.15916	up
ENSOARG00000002688	0.518069	0.627485	0.301158	1.086	1.08716	1.55501	0.00202531	1.25389	up		ENSOARG00000002441	2.8152	2.66881	1.77857	6.18844	6.26567	7.52364	7.71121e-06	1.31194	up		ENSOARG00000002721	0.00479977	0.0812575	0.00514812	0.138711	0.129004	0.100909	0.020274	1.97802	up		ENSOARG00000003008	1.67664	0.919449	7.99074	5.47932	3.93576	0.00167366	2.14562	up
ENSOARG00000002786	0	0	0	0.662529	0.237282	1.21804	0.000181228	Inf	up		ENSOARG00000002516	0.143854	0.421336	0.577774	0.595157	1.47951	1.486	0.00744559	1.51939	up		ENSOARG00000002747	0.265884	0.264781	0.0950602	1.70753	3.79997	0.802252	0.00794253	3.27692	up		ENSOARG00000003077	0.0728129	0.135197	0.40638	0.486753	0.366274	0.0136289	1.9891	up
ENSOARG00000002793	0.0445146	0.100631	0.0433933	0.100905	0.498713	0.398229	0.0317298	2.25718	up		ENSOARG00000002518	0.0534049	0	0.0339619	0.419803	0.185253	0.535357	0.00549773	3.52701	up		ENSOARG00000002786	0	0	0.0331419	0.662529	0.237282	1.21804	0.000570172	5.97473	up		ENSOARG00000003112	1.15083	2.19788	0.464694	1.06705	0.807619	0.0439103	-1.13687	down
ENSOARG00000002851	0.133411	0.115392	0.0395805	0.215633	0.36283	0.311346	0.0329036	1.51444	up		ENSOARG00000002570	3.94133	29.291	13.2454	1.96319	3.6951	1.64638	0.0327769	-2.77576	down		ENSOARG00000002793	0	0.0862319	0	0.100905	0.498713	0.398229	0.00390191	3.47236	up		ENSOARG00000003193	12.3246	11.6269	25.0513	29.4073	22.2044	0.000126886	1.06883	up
ENSOARG00000002857	0	0.0119038	0	0.0954892	0.0614514	0.0448638	0.0334569	3.92394	up		ENSOARG00000002603	1.89663	1.05285	1.23554	0.277053	0.873649	0.477284	0.00499508	-1.54103	down		ENSOARG00000002816	0.509935	0.387789	0.278444	0.0691464	0.0622982	0.0649743	0.000445184	-2.6208	down		ENSOARG00000003201	0.942345	0.772925	2.2837	1.85608	1.56794	0.00467881	1.13166	up
ENSOARG00000002881	0.289299	0.230027	0.141006	0.43417	1.16419	2.31185	0.0281455	2.45578	up		ENSOARG00000002632	0.672136	0.388662	0.318089	0.122872	0.144592	0.0989643	0.0109857	-2.0793	down		ENSOARG00000002824	0.0152637	0.0228006	0.0245572	0.0569178	0.13919	0.153765	0.0170437	2.43104	up		ENSOARG00000003207	0.958528	0.752587	1.72063	1.77168	1.74813	0.0266766	1.00712	up
ENSOARG00000002974	0	0	0	0.133055	0.068501	0.0625132	0.0273853	Inf	up		ENSOARG00000002640	0.366012	0.282832	0.289111	0.960487	0.690506	0.756177	0.00419385	1.21622	up		ENSOARG00000002839	0.232883	0.165655	0.142734	1.24059	0.415154	0.699441	0.0160839	2.09954	up		ENSOARG00000003221	0.398089	0.47281	2.82072	1.7616	3.30171	8.62395e-06	2.57845	up
ENSOARG00000003029	67.1321	91.1257	107.605	25.0074	22.5917	26.2279	2.96804e-08	-1.96171	down		ENSOARG00000002655	0.527602	0.644019	0.311306	4.94139	6.64773	12.2308	5.77668e-06	3.86006	up		ENSOARG00000002856	0	0.0177475	0.0191148	0.116297	0.0342135	0.156114	0.0478081	3.03382	up		ENSOARG00000003222	16.0039	39.9013	5.9864	5.31734	6.52078	0.0109282	-2.25273	down
ENSOARG00000003112	1.82778	1.19754	2.76767	0.464694	1.06705	0.807619	0.0086248	-1.42453	down		ENSOARG00000002665	19.8557	22.4492	44.8428	10.003	12.6878	14.3093	0.0163455	-1.36516	down		ENSOARG00000002937	2.03384	2.2386	1.66479	32.9809	24.7117	11.1117	6.48221e-05	3.50257	up		ENSOARG00000003299	0.556064	0.765732	1.52007	3.05263	2.28942	0.000417628	1.75815	up
ENSOARG00000003121	1.06948	0.96708	1.20119	4.6799	2.61558	13.6284	0.0488078	2.59153	up		ENSOARG00000002786	0	0	0.163125	0.662529	0.237282	1.21804	0.00588587	3.6126	up		ENSOARG00000002980	0.127542	0.190519	0.0683992	7.25289	6.79472	0.0558628	0.0050549	5.15343	up		ENSOARG00000003353	9.8074	10.1274	3.79713	5.46234	3.79264	2.38685e-05	-1.22417	down
ENSOARG00000003172	0.0111874	0.0101162	0.0109056	0.0456469	0.0313341	0.114381	0.0320052	2.46918	up		ENSOARG00000002839	0.138093	0.261611	0.210762	1.24059	0.415154	0.699441	0.0316213	1.84476	up		ENSOARG00000002985	0.0546081	1.7674	0.0439285	3.41082	4.6128	1.96128	0.00151138	2.37572	up		ENSOARG00000003432	0.0613172	0.0195175	0.162031	0.304911	0.126004	0.0169039	2.25446	up
ENSOARG00000003188	7.70006	5.33428	6.96772	4.70287	2.31658	2.97335	0.000189861	-1.09027	down		ENSOARG00000002909	0.0785206	0.345321	0.156934	0.932145	1.02465	0.544479	0.00211849	2.00207	up		ENSOARG00000003077	0.0533777	0.106312	0.171755	0.40638	0.486753	0.366274	0.0058902	1.8864	up		ENSOARG00000003473	0.101293	1.8731	0	0.0135768	0	0.0237882	-7.83956	down
ENSOARG00000003206	9.97274	12.2538	16.8287	3.82234	5.14363	5.39426	2.80492e-05	-1.56127	down		ENSOARG00000002926	2.02576	0.917322	1.89804	0.805829	0.770994	0.582982	0.00995259	-1.31949	down		ENSOARG00000003085	0.372366	0.273556	0.314274	0.734103	0.615254	0.705851	0.022754	1.06127	up		ENSOARG00000003501	115.285	364.92	9.13544	16.1036	14.7888	0.00284802	-4.19903	down
ENSOARG00000003227	16.3212	9.97979	13.1493	4.84463	8.45023	0.621901	0.000161403	-1.6161	down		ENSOARG00000002953	0.0121321	0	0.0154304	0.0544957	0.112225	0.128019	0.0307496	3.24454	up		ENSOARG00000003227	19.6228	13.8005	12.2139	4.84463	8.45023	0.621901	0.000170296	-1.7653	down		ENSOARG00000003578	0.0434673	0.115298	0	0	0	0.0244471	#NAME?	down
ENSOARG00000003299	1.70025	1.01063	0.463613	1.52007	3.05263	2.28942	0.0303858	1.00784	up		ENSOARG00000003029	38.4067	53.4057	110.802	25.0074	22.5917	26.2279	0.0274762	-1.57409	down		ENSOARG00000003341	28.1419	22.1231	9.51417	46.5791	136.951	292.559	0.0229348	2.94022	up		ENSOARG00000003600	3.01483	6.51043	7.33647	11.1482	11.2973	0.00763265	1.03204	up
ENSOARG00000003307	0.0242474	0.0219258	0.0236366	0.857431	0.633855	0.0826354	0.0072336	4.39442	up		ENSOARG00000003065	1.04824	1.24115	3.45457	5.24833	6.85048	5.82388	1.54737e-06	1.51797	up		ENSOARG00000003426	1.37717	0.816711	0.840908	0.543354	0.539671	0.474423	0.00619055	-1.00253	down		ENSOARG00000003664	0.637228	0.378619	0.154839	0.151461	0.109122	0.00609947	-1.89677	down
ENSOARG00000003341	10.8554	23.6825	4.79925	46.5791	136.951	292.559	0.0123121	3.46152	up		ENSOARG00000003120	0.88422	0.306031	0.415239	1.09988	1.39991	1.43544	0.0467271	1.11323	up		ENSOARG00000003430	6.70942	7.20186	10.8093	31.6456	32.149	38.3355	2.25357e-20	2.00819	up		ENSOARG00000003822	0.172977	0.275297	0.606225	0.767779	0.415842	0.0225046	1.38717	up
ENSOARG00000003353	7.29063	9.44415	8.29313	3.79713	5.46234	3.79264	0.00030494	-1.06004	down		ENSOARG00000003206	8.52852	10.162	10.3706	3.82234	5.14363	5.39426	3.33378e-07	-1.15533	down		ENSOARG00000003583	0.322404	0.65742	0.650438	0.236152	0.338948	0.201731	0.0434282	-1.11342	down		ENSOARG00000003826	2.44336	1.7331	5.09159	4.86589	4.93006	0.000127036	1.22728	up
ENSOARG00000003370	0	0.00962091	0	0.120588	0.0546331	0.16317	7.29164e-05	4.97925	up		ENSOARG00000003207	0.443334	0.893288	0.929874	1.72063	1.77168	1.74813	0.00602854	1.09156	up		ENSOARG00000003814	0.528535	0.290395	0.3763	0.734834	1.23336	0.918	0.00102269	1.22284	up		ENSOARG00000003910	1.07107	1.17139	0.0150149	0.309208	0.014109	8.07841e-06	-3.37986	down
ENSOARG00000003383	2.03331	0.496238	0.84359	2.80052	1.72754	2.81138	0.0335982	1.0509	up		ENSOARG00000003227	17.1858	17.8364	10.974	4.84463	8.45023	0.621901	6.41517e-05	-1.88179	down		ENSOARG00000003815	16.2348	19.5286	13.583	6.76426	6.22411	3.67084	1.85916e-09	-1.6036	down		ENSOARG00000003963	18.3067	23.6277	1.70689	2.99674	1.71808	1.12067e-26	-3.32366	down
ENSOARG00000003401	3.56335	1.27775	0.763591	3.98295	3.69961	6.38603	0.0213672	1.24898	up		ENSOARG00000003268	1.48067	1.58493	0.741872	3.38427	2.3433	3.54306	0.00102237	1.14276	up		ENSOARG00000003822	0.29263	0.343223	0.195295	0.606225	0.767779	0.415842	0.0384233	1.06272	up		ENSOARG00000003992	0.694261	0.528142	1.79042	0.995513	1.32348	0.0416627	1.15221	up
ENSOARG00000003414	0	0	0.0586928	0.163778	0.0749496	0.461687	0.0408979	3.46955	up		ENSOARG00000003341	5.44142	19.56	8.90993	46.5791	136.951	292.559	0.00847765	3.69289	up		ENSOARG00000003892	0.302127	0.203089	0.226838	0.675972	0.812031	0.56902	0.0062267	1.44758	up		ENSOARG00000004059	220.44	187.669	43.0441	99.9972	55.4891	1.73271e-07	-1.66141	down
ENSOARG00000003422	0.254871	0.175156	0.114288	0.531518	0.33789	0.429959	0.0482072	1.16497	up		ENSOARG00000003352	0.99067	1.79877	1.50699	0.560385	0.631017	0.36056	6.20257e-07	-1.59305	down		ENSOARG00000003903	307.774	431.632	639.019	202.459	216.723	157.23	0.00357223	-1.29605	down		ENSOARG00000004073	0.869957	0.816237	1.86713	1.4166	1.94839	0.00257882	1.03108	up
ENSOARG00000003424	0	0	0	0.0085093	0.0131426	0.0319835	0.0222028	Inf	up		ENSOARG00000003414	0	0.0191871	0	0.163778	0.0749496	0.461687	0.0143625	5.12296	up		ENSOARG00000003910	1.41736	1.8285	0.0172752	0.0150149	0.309208	0.014109	0.0308726	-3.356	down		ENSOARG00000004213	0.130781	0.27752	0.0595843	0.0766902	0.0233288	0.0148673	-1.96537	down
ENSOARG00000003430	5.47059	5.03627	2.85242	31.6456	32.149	38.3355	3.20009e-24	2.82912	up		ENSOARG00000003422	0.131705	0.0633521	0.125633	0.531518	0.33789	0.429959	0.0010737	1.87143	up		ENSOARG00000003934	12.3976	8.41096	3.49418	24.0148	22.99	37.231	6.46809e-05	1.75141	up		ENSOARG00000004235	1.04321	0.796164	2.00123	2.64444	2.03719	0.0203255	1.24918	up
ENSOARG00000003501	38.1147	89.9608	80.1397	9.13544	16.1036	14.7888	0.000126777	-2.5127	down		ENSOARG00000003430	15.6824	4.08128	6.43087	31.6456	32.149	38.3355	1.68079e-07	1.77856	up		ENSOARG00000003953	5.64005	8.79154	11.6318	3.19889	4.32618	4.72753	0.00633337	-1.13151	down		ENSOARG00000004280	0.00699515	0.00742193	0.00637403	0.66944	1.02419	0.0153314	6.2529	up
ENSOARG00000003531	4.14797	8.27123	5.00667	3.61021	3.04145	2.81726	0.0352278	-1.00014	down		ENSOARG00000003501	35.9507	56.4843	29.4172	9.13544	16.1036	14.7888	5.24657e-05	-1.7463	down		ENSOARG00000003992	0.153645	0.280513	0.302125	1.79042	0.995513	1.32348	6.7209e-06	2.45319	up		ENSOARG00000004285	7.02989	7.23469	13.7695	21.6526	23.9903	0.000147553	1.44427	up
ENSOARG00000003535	1.21802	1.83894	0.614871	2.59335	2.0814	3.61361	0.0178308	1.06053	up		ENSOARG00000003604	4.13243	5.12857	7.9806	14.4081	15.0251	8.99291	0.00247951	1.02957	up		ENSOARG00000004007	0.0231204	0.0153496	0.0661289	0.416705	0.177545	0.202532	0.00145877	2.90932	up		ENSOARG00000004301	4.57778	2.10877	1.09107	0.901812	1.87612	0.0400591	-1.39546	down
ENSOARG00000003713	0.108935	0.150654	0.12493	0.255646	0.376898	0.62785	0.015098	1.59309	up		ENSOARG00000003646	0.308975	0.426809	0.360226	1.19993	1.28019	0.896591	0.0114694	1.49169	up		ENSOARG00000004019	2.1707	2.14678	4.01955	5.63354	7.40054	9.38078	4.46032e-05	1.38464	up		ENSOARG00000004314	98.6932	257.221	33.5815	18.4936	27.0983	0.00618752	-2.76388	down
ENSOARG00000003736	0.0356914	0	0.0260943	0.0566331	0.133288	0.121637	0.0454424	2.24948	up		ENSOARG00000003733	0.169178	0.252567	0.252592	0.801223	0.510306	0.395844	0.0412554	1.22317	up		ENSOARG00000004059	169.16	163.068	122.008	43.0441	99.9972	55.4891	2.26333e-05	-1.24863	down		ENSOARG00000004341	13.7909	7.77696	33.1239	35.086	22.6704	9.77382e-05	1.46678	up
ENSOARG00000003780	0.173011	0.29613	0.391517	0.106448	0.161526	0.0368515	0.0217612	-1.62654	down		ENSOARG00000003782	156.185	208.897	145.978	343.197	435.578	357.944	0.0022961	1.01524	up		ENSOARG00000004060	4.68799	4.43893	4.45121	12.6381	12.1426	9.9771	3.13933e-07	1.3179	up		ENSOARG00000004628	0.565234	0.725977	0.262041	0.479155	0.152832	0.0214996	-1.14858	down
ENSOARG00000003790	0	0	0	0.81635	0.798542	0.920513	9.76164e-06	Inf	up		ENSOARG00000003783	1.40599	1.75353	2.28894	3.83142	5.05059	3.08592	0.0133865	1.00179	up		ENSOARG00000004127	10.7366	9.81322	13.4088	19.5154	28.5415	63.1733	0.0395232	1.66729	up		ENSOARG00000004645	0.530227	0.493337	2.34141	1.7144	2.26299	4.5979e-06	2.02425	up
ENSOARG00000003815	19.5586	12.1831	21.5445	6.76426	6.22411	3.67084	1.02558e-06	-1.77668	down		ENSOARG00000003792	40.957	37.2843	34.8442	20.0743	13.7144	23.6651	6.73093e-07	-1.11602	down		ENSOARG00000004206	5.3115	6.81733	3.19281	19.1612	12.7903	8.52408	0.0157927	1.37048	up		ENSOARG00000004679	0	0	0.0918852	0.283834	0.323779	0.00576022	Inf	up
ENSOARG00000003822	0.294183	0.175328	0.195527	0.606225	0.767779	0.415842	0.0244249	1.32652	up		ENSOARG00000003815	19.4694	19.3662	16.3151	6.76426	6.22411	3.67084	1.03443e-16	-1.86748	down		ENSOARG00000004214	0.0757923	0	0.406464	0.494596	1.01854	0.929506	0.00999987	2.29477	up		ENSOARG00000004696	0.0537111	0.0569881	1.66403	1.05828	0.643846	0.00131802	4.3299	up
ENSOARG00000003890	183.829	273.622	289.182	123.166	145.976	105.16	0.000321292	-1.11631	down		ENSOARG00000003822	0.20514	0.0639192	0.240312	0.606225	0.767779	0.415842	0.00269042	1.65367	up		ENSOARG00000004234	4.28481	5.4773	5.79903	3.15926	2.49022	1.66517	1.14795e-05	-1.12194	down		ENSOARG00000004802	1.7279	2.01976	0.820594	0.947982	0.463903	0.000783346	-1.35615	down
ENSOARG00000003903	463.724	605.62	1076.81	202.459	216.723	157.23	0.00182238	-2.01257	down		ENSOARG00000003890	252.507	226.054	382.085	123.166	145.976	105.16	0.000101793	-1.33946	down		ENSOARG00000004271	4.60592	4.92754	8.24307	14.5172	11.1751	17.5761	0.000119461	1.24927	up		ENSOARG00000004828	22.6571	22.9047	9.34062	16.5956	3.88838	0.00342233	-1.22975	down
ENSOARG00000003953	4.57457	25.9443	23.3746	3.19889	4.32618	4.72753	0.0223087	-2.27616	down		ENSOARG00000003892	0.18184	0.245002	0.279125	0.675972	0.812031	0.56902	0.00864701	1.41182	up		ENSOARG00000004281	0.0224589	0	0.180666	0.366398	0.592851	0.403312	0.000427063	2.70391	up		ENSOARG00000004852	0.0226715	0.0432984	0	0.00425426	0	0.00882541	-4.61211	down
ENSOARG00000003963	5.60285	4.13159	6.03402	1.70689	2.99674	1.71808	3.02695e-06	-1.40977	down		ENSOARG00000003903	349.576	529.765	664.458	202.459	216.723	157.23	7.97974e-06	-1.54546	down		ENSOARG00000004285	7.04184	10.5837	7.56734	13.7695	21.6526	23.9903	0.00016334	1.19142	up		ENSOARG00000004915	1.31477	1.46714	2.08622	3.55183	2.95022	0.0490081	1.01069	up
ENSOARG00000003992	0.25012	0.607093	0.256653	1.79042	0.995513	1.32348	0.00242053	1.7654	up		ENSOARG00000003904	0.0371623	0.0660021	0.0236327	0.229526	0.365246	0.705851	0.0019276	3.22282	up		ENSOARG00000004293	0.0520231	0.0777108	0.111597	0.0121245	0	0.0113929	0.02694	-3.37079	down		ENSOARG00000005169	3.41875	3.64911	8.7375	9.3146	6.52253	2.81186e-05	1.19032	up
ENSOARG00000003997	0.046346	0.0495282	0.0677679	0.017191	0.0118007	0.0107692	0.0134938	-2.14504	down		ENSOARG00000003910	2.63405	2.37472	0.0170058	0.0150149	0.309208	0.014109	0.012903	-4.10305	down		ENSOARG00000004341	7.18674	16.9022	9.60944	33.1239	35.086	22.6704	6.5001e-05	1.39228	up		ENSOARG00000005228	14.5398	9.86952	7.90174	4.69002	5.53306	0.00567668	-1.0274	down
ENSOARG00000004046	95.2327	142.284	188.576	83.3827	73.0809	50.6619	0.00680368	-1.15515	down		ENSOARG00000003922	7.52365	5.42279	6.51253	17.8737	21.4953	10.8526	0.00207025	1.21532	up		ENSOARG00000004628	1.24066	0.854242	0.530202	0.262041	0.479155	0.152832	0.00520414	-1.60671	down		ENSOARG00000005252	54.1475	43.5311	16.6234	23.7265	2.99114	3.27677e-05	-1.78657	down
ENSOARG00000004048	5.7284	3.68657	4.12337	1.96662	1.34018	2.7221	1.81093e-05	-1.2599	down		ENSOARG00000003959	0.12124	0.143553	0.244152	0.431138	0.876176	0.629009	0.00672837	1.78956	up		ENSOARG00000004645	0.932877	0.706679	0.838093	2.34141	1.7144	2.26299	0.000145417	1.31629	up		ENSOARG00000005289	3.59741	5.74587	20.4082	16.3318	33.2199	0.000650782	2.30079	up
ENSOARG00000004059	183.012	142.376	77.0135	43.0441	99.9972	55.4891	0.0210519	-1.13502	down		ENSOARG00000003992	0.170066	0.201364	0.635383	1.79042	0.995513	1.32348	0.000246158	1.92175	up		ENSOARG00000004660	2.01416	1.84676	2.28269	4.68812	3.75728	4.54229	2.91744e-06	1.04483	up		ENSOARG00000005335	31.0347	26.103	52.5704	55.3184	73.1261	0.000112878	1.0554	up
ENSOARG00000004060	0.853374	4.67286	3.18886	12.6381	12.1426	9.9771	1.15765e-08	1.85974	up		ENSOARG00000004007	1.00446	1.13629	0.292939	0.416705	0.177545	0.202532	0.0236723	-1.74437	down		ENSOARG00000004679	0	0	0	0.0918852	0.283834	0.323779	0.000607928	Inf	up		ENSOARG00000005336	1.75731	1.42947	3.48722	3.05941	3.20994	0.00746118	1.00953	up
ENSOARG00000004067	0.265204	0.141707	0.129262	0.502787	0.573976	0.801111	0.0162644	1.71388	up		ENSOARG00000004033	0.730563	0.741438	0.553081	1.27943	1.77998	1.45002	0.0236974	1.00587	up		ENSOARG00000004703	4.8085	4.76804	3.36837	9.46449	12.3546	10.6793	7.38948e-08	1.28347	up		ENSOARG00000005392	0.412217	0.286277	0.0239028	0.0632879	0.170059	0.000981837	-2.05823	down
ENSOARG00000004127	10.7112	11.5772	7.41955	19.5154	28.5415	63.1733	0.0340815	1.79183	up		ENSOARG00000004046	126.106	131.259	140.53	83.3827	73.0809	50.6619	0.000350407	-1.07642	down		ENSOARG00000004756	219.747	204.698	200.442	131.67	115.601	9.98359	0.000480549	-1.31443	down		ENSOARG00000005403	3.14398	3.38518	6.427	7.83545	10.5509	0.000295892	1.31604	up
ENSOARG00000004214	0.116889	0.14093	0.189908	0.494596	1.01854	0.929506	0.0154981	2.32397	up		ENSOARG00000004048	5.31196	3.55776	3.35493	1.96662	1.34018	2.7221	0.00690471	-1.17135	down		ENSOARG00000004915	1.24079	1.34597	1.25955	2.08622	3.55183	2.95022	0.0120757	1.11083	up		ENSOARG00000005565	5.89181	11.9418	3.95544	3.95898	4.56251	0.038576	-1.1212	down
ENSOARG00000004235	1.43464	0.648636	0.555814	2.00123	2.64444	2.03719	0.0177472	1.24714	up		ENSOARG00000004165	0.139255	0.164883	0.0805063	0.0142163	0.0146381	0.026717	0.0206332	-2.93435	down		ENSOARG00000004925	0	0	0	0.0157511	0.0270306	0.0197343	0.025314	Inf	up		ENSOARG00000005578	35.0227	58.01	28.9449	16.4173	19.7535	0.0146625	-1.11049	down
ENSOARG00000004281	0.0346368	0	0.213841	0.366398	0.592851	0.403312	0.00372784	2.34142	up		ENSOARG00000004206	4.74857	7.07316	5.80182	19.1612	12.7903	8.52408	0.0328726	1.07961	up		ENSOARG00000005132	1.31837	0.507373	0.450692	1.5522	1.36633	2.1165	0.0134187	1.10459	up		ENSOARG00000005642	0.42727	0.235064	0.115358	0.0445425	0.0812979	0.0084927	-2.04971	down
ENSOARG00000004284	1.84315	0.507247	0.937419	0.217983	0.299267	0.546214	0.0379766	-1.7135	down		ENSOARG00000004214	0.188759	0.0372494	0.200063	0.494596	1.01854	0.929506	0.0108532	2.34588	up		ENSOARG00000005155	2.90909	4.50646	3.81359	1.62718	1.67545	1.75552	0.0462168	-1.18961	down		ENSOARG00000005674	0	0	0.176734	0.314324	0.0905836	0.00302861	Inf	up
ENSOARG00000004293	0.147091	0.0362748	0.143386	0.0121245	0	0.0113929	0.00816857	-3.85737	down		ENSOARG00000004234	5.62017	4.71709	5.72504	3.15926	2.49022	1.66517	2.30298e-06	-1.27303	down		ENSOARG00000005167	5.83991	6.33099	5.47087	14.5753	12.6306	11.656	0.000421673	1.10298	up		ENSOARG00000005764	1.98556	1.75135	3.94549	5.47658	3.97371	0.0075114	1.22911	up
ENSOARG00000004301	3.59362	3.26434	6.34388	1.09107	0.901812	1.87612	0.000796229	-1.87603	down		ENSOARG00000004241	0.670611	1.13048	0.621623	1.60188	2.41825	1.72111	0.00185484	1.10934	up		ENSOARG00000005218	1.41176	1.51951	1.07831	2.52585	2.55972	3.34156	0.000547506	1.03127	up		ENSOARG00000005814	14.3827	14.5992	27.6136	35.2918	32.1755	7.7114e-05	1.10302	up
ENSOARG00000004535	38.3095	48.8982	72.62	27.0655	26.6088	23.5079	0.00420664	-1.16399	down		ENSOARG00000004280	0.00567607	0.00672066	0.00721918	0.00637403	0.66944	1.02419	0.00303471	6.2831	up		ENSOARG00000005252	80.6979	48.8714	43.9894	16.6234	23.7265	2.99114	0.000154571	-2.04906	down		ENSOARG00000005923	0.0611062	0.0648343	0.00928007	0	0	0.0155781	-4.31589	down
ENSOARG00000004543	0.910751	0.346265	0.655769	0.284647	0.425144	0.288047	0.0309108	-1.03598	down		ENSOARG00000004301	3.52948	4.03033	4.26205	1.09107	0.901812	1.87612	1.97834e-08	-1.74392	down		ENSOARG00000005289	3.55407	5.87376	3.16315	20.4082	16.3318	33.2199	2.56131e-05	2.43697	up		ENSOARG00000005951	23.5437	13.8884	92.3366	65.1497	42.9862	0.00722254	1.82123	up
ENSOARG00000004549	0.013093	0.0236788	0.0255265	0.0712296	0.0733429	0.223106	0.0455708	2.44189	up		ENSOARG00000004378	0.684078	0.924512	0.817322	1.10186	2.64461	1.6843	0.0249795	1.01711	up		ENSOARG00000005390	0	0	0.0371454	0.112998	0.0997294	0.166855	0.0211451	3.32238	up		ENSOARG00000005972	0.351103	0.220366	0.0630843	0.0835148	0.0677463	0.00431949	-2.02711	down
ENSOARG00000004645	0.590241	0.378056	0.343626	2.34141	1.7144	2.26299	8.81671e-07	2.17566	up		ENSOARG00000004403	2.56072	3.66183	4.40849	1.60462	1.67513	1.40927	1.11896e-06	-1.30691	down		ENSOARG00000005403	3.49257	4.08711	3.64304	6.427	7.83545	10.5509	0.000100321	1.10212	up		ENSOARG00000006037	2.95865	2.9134	7.70929	6.90179	4.91039	0.00118971	1.12897	up
ENSOARG00000004679	0	0.022909	0	0.0918852	0.283834	0.323779	0.00355203	4.75096	up		ENSOARG00000004421	0.743751	0.770547	0.756759	1.50337	1.93497	2.45254	0.0209568	1.23211	up		ENSOARG00000005437	0.0855799	0.0639185	0.14916	0.18948	0.390202	0.384207	0.031477	1.6414	up		ENSOARG00000006043	6.00109	5.63088	22.0031	12.7452	12.5749	0.0154999	1.42819	up
ENSOARG00000004696	0	0	0.526179	1.66403	1.05828	0.643846	0.00890548	2.57087	up		ENSOARG00000004506	1.93548	2.15172	1.34358	3.53397	5.19343	4.38868	0.000229221	1.12349	up		ENSOARG00000005499	1.83894	2.13217	1.77516	4.2491	11.5747	4.32641	0.0294041	1.75263	up		ENSOARG00000006068	32.7296	22.9686	7.49963	6.78296	7.63583	1.42876e-08	-1.95115	down
ENSOARG00000004756	164.311	330.079	376.029	131.67	115.601	9.98359	0.00243252	-1.87816	down		ENSOARG00000004619	0.274616	0.325154	0.0582122	0.462576	1.66705	1.71451	0.00558368	2.38057	up		ENSOARG00000005501	0.0636858	0.0390286	0.0315267	0.00913391	0	0.0128742	0.0304413	-2.62977	down		ENSOARG00000006070	36.2367	52.8403	23.8235	24.6654	17.5205	0.00091088	-1.03884	down
ENSOARG00000004835	0.188374	0.238472	0.174447	0.409922	0.593555	0.429324	0.0404952	1.13251	up		ENSOARG00000004645	0.575863	0.446723	0.437767	2.34141	1.7144	2.26299	4.7941e-07	1.96843	up		ENSOARG00000005605	0.464813	0.542691	0.120339	0.134478	0.0923115	0.126364	0.0366897	-1.7104	down		ENSOARG00000006078	7.62594	7.03974	5.13178	3.10692	2.37313	0.00103679	-1.06309	down
ENSOARG00000004957	5.6597	4.19968	1.93051	1.35813	2.15864	1.46461	0.0176633	-1.35033	down		ENSOARG00000004655	0.138681	0.105193	0.0992156	0.0365002	0.0526163	0.0388709	0.0173426	-1.58035	down		ENSOARG00000005642	0.185614	0.200247	0.331808	0.115358	0.0445425	0.0812979	0.0348526	-1.59546	down		ENSOARG00000006114	2.70808	2.05681	7.50993	5.49504	5.18069	0.000430151	1.33117	up
ENSOARG00000005045	0.831213	0.328836	0.481101	1.29537	2.15833	1.6377	0.0197144	1.53604	up		ENSOARG00000004660	1.34469	1.75874	1.94082	4.68812	3.75728	4.54229	3.0142e-07	1.23879	up		ENSOARG00000005666	2.99823	2.61797	2.79637	0.982324	1.41814	1.36079	0.000448073	-1.20688	down		ENSOARG00000006119	4.80306	17.2283	29.4425	33.8239	51.6635	0.0012911	1.77552	up
ENSOARG00000005080	5.29032	2.91068	6.34035	14.8777	11.4513	12.8223	4.55688e-07	1.33423	up		ENSOARG00000004679	0	0	0	0.0918852	0.283834	0.323779	0.000674344	Inf	up		ENSOARG00000005674	0.034469	0	0	0.176734	0.314324	0.0905836	0.00339163	4.0189	up		ENSOARG00000006128	5.214	4.27087	10.8661	10.5688	11.2767	2.78749e-05	1.17946	up
ENSOARG00000005207	0.549933	0.532088	0.686183	1.46099	1.55568	1.31192	0.0034167	1.18188	up		ENSOARG00000004749	0.0521234	0.0555443	0.125958	0.280958	0.307374	0.247505	0.013243	1.71257	up		ENSOARG00000005838	0.735382	3.9261	0.876392	2.93264	5.98047	6.26294	0.0271322	1.40462	up		ENSOARG00000006148	0.660497	0.259198	0.0494672	0.00848913	0	0.000333365	-4.55788	down
ENSOARG00000005221	0.382821	0.156599	0.0118469	0.476585	0.405628	0.463361	0.0235484	1.21117	up		ENSOARG00000004758	0.551139	0.692288	0.841167	1.99127	1.30225	2.00261	0.000373505	1.22238	up		ENSOARG00000005978	0	0.0202172	0.0217749	0.32174	0.194874	0.177839	0.00292157	4.02258	up		ENSOARG00000006175	0.0714884	0.202267	0.57541	0.950207	0.867147	0.000735294	2.51409	up
ENSOARG00000005236	0.340306	0.203409	0.168678	0.590969	0.581577	0.619196	0.025432	1.23564	up		ENSOARG00000004828	77.2769	88.0997	69.452	9.34062	16.5956	3.88838	1.25561e-39	-3.12709	down		ENSOARG00000006043	4.22969	3.60614	11.5128	22.0031	12.7452	12.5749	0.0253797	1.26458	up		ENSOARG00000006214	0.0058307	0.111356	0.340031	0.547061	0.404385	0.000121798	2.84992	up
ENSOARG00000005238	0.847943	0.480117	0.842034	1.61672	1.74237	1.95804	0.000575253	1.19354	up		ENSOARG00000004982	7.08493	3.86415	8.59332	2.69302	1.98927	3.21818	0.00362148	-1.44974	down		ENSOARG00000006050	46.8185	78.4774	37.4723	1930.55	17.2966	3789.94	0.0102341	5.11528	up		ENSOARG00000006321	0.0995737	0.0422595	0.181465	0.298958	0.170516	0.0495428	1.58121	up
ENSOARG00000005252	56.6785	44.003	87.1161	16.6234	23.7265	2.99114	5.85695e-05	-2.2305	down		ENSOARG00000005167	3.92754	4.10537	5.50262	14.5753	12.6306	11.656	3.73611e-05	1.3904	up		ENSOARG00000006068	12.5514	16.5542	36.0514	7.49963	6.78296	7.63583	0.0350747	-1.60664	down		ENSOARG00000006370	0.0451064	0.143575	0.353472	0.668668	0.278074	0.0093159	2.16751	up
ENSOARG00000005289	3.92625	5.3079	1.66736	20.4082	16.3318	33.2199	2.1641e-05	2.57075	up		ENSOARG00000005205	0.912601	0.739324	0.946889	0.350596	0.138845	0.0591306	2.43097e-05	-2.36719	down		ENSOARG00000006075	4.63379	4.17352	4.61823	2.16372	2.17281	2.19841	7.09356e-05	-1.07794	down		ENSOARG00000006446	0.71523	0.571493	10.2184	2.51026	12.0061	0.00503989	3.6731	up
ENSOARG00000005377	0.586469	0.57274	1.39494	0.233973	0.262816	0.159895	0.0114099	-2.07257	down		ENSOARG00000005218	1.01217	1.01622	1.15183	2.52585	2.55972	3.34156	8.23016e-05	1.26754	up		ENSOARG00000006096	0	0	0.241382	0.629398	0.378041	0.689992	0.0203615	2.78931	up		ENSOARG00000006464	3.11641	1.88314	6.81832	9.79602	16.0672	0.00478906	2.09544	up
ENSOARG00000005426	0.662848	0.786285	0.625307	0.432987	0.326057	0.321846	0.0497734	-1.04761	down		ENSOARG00000005228	12.5211	15.9042	31.1848	7.90174	4.69002	5.53306	0.00544063	-1.83067	down		ENSOARG00000006108	0.186656	0.192077	0.146815	0.249411	0.871963	1.43888	0.0296683	2.23039	up		ENSOARG00000006677	43.4742	31.4092	15.6504	17.8606	19.5244	2.78757e-05	-1.10732	down
ENSOARG00000005450	588.047	626.831	721.111	314.282	444.798	189.689	0.00339136	-1.14683	down		ENSOARG00000005252	65.4644	90.8814	43.2232	16.6234	23.7265	2.99114	1.24135e-05	-2.34683	down		ENSOARG00000006119	3.9745	7.22534	7.06676	29.4425	33.8239	51.6635	2.14189e-08	2.61287	up		ENSOARG00000006707	0.118234	0.0537635	0.323209	0.649748	0.491716	0.0125919	2.47045	up
ENSOARG00000005461	0.033179	0.0200014	0.140154	0.160447	0.454319	0.188457	0.0336884	1.92718	up		ENSOARG00000005289	3.17015	3.12178	3.39326	20.4082	16.3318	33.2199	4.95421e-06	2.71584	up		ENSOARG00000006128	4.29103	3.71611	4.96511	10.8661	10.5688	11.2767	2.44937e-09	1.29604	up		ENSOARG00000006711	55.1323	19.3783	141.351	201.661	124.712	4.03328e-06	2.03548	up
ENSOARG00000005490	3.23077	7.13811	5.87436	4.20526	1.59062	2.13974	0.0382096	-1.14093	down		ENSOARG00000005336	1.33879	1.65084	1.13853	3.48722	3.05941	3.20994	0.000997534	1.10609	up		ENSOARG00000006175	0.0931675	0.33633	0.124911	0.57541	0.950207	0.867147	0.000910242	2.06273	up		ENSOARG00000006745	9.73879	5.3853	2.82926	3.80544	4.78735	0.0333143	-1.01763	down
ENSOARG00000005518	1.87086	1.25401	1.5049	3.41638	4.42161	4.28033	0.000906319	1.28401	up		ENSOARG00000005342	0.443654	1.07081	0.672779	1.66708	2.0125	2.17869	0.0125585	1.30201	up		ENSOARG00000006214	0.0455933	0.0056755	0.00611278	0.340031	0.547061	0.404385	3.11593e-09	4.43971	up		ENSOARG00000006764	0.0300361	0.191212	2.25796	3.56492	2.25031	4.67968e-13	4.57673	up
ENSOARG00000005587	7.58365	13.856	13.2358	10.3331	2.80298	4.65567	0.0455811	-1.06192	down		ENSOARG00000005351	0.0970568	0.0478827	0.0822953	0.290644	0.252506	0.238969	0.0458629	1.62883	up		ENSOARG00000006272	1045.16	1051.97	874.471	2281.68	2491.22	2325.16	0.00104467	1.21518	up		ENSOARG00000006779	19.4977	55.8917	9.99591	2.47921	3.69369	0.0123181	-2.80165	down
ENSOARG00000005591	0.0615207	0.144638	0.0959536	0.345845	0.482466	0.408843	0.0204211	1.90232	up		ENSOARG00000005405	0.567607	0.631742	0.714699	0.172099	0.269089	0.461187	0.0177784	-1.22543	down		ENSOARG00000006409	0.0383591	0	0.0205715	0.0715197	0.276156	0.117608	0.0304809	2.91688	up		ENSOARG00000006786	0.0640244	0.0951028	0.450381	0.408478	0.385929	9.85024e-06	2.36341	up
ENSOARG00000005642	0.91444	0.589604	0.317806	0.115358	0.0445425	0.0812979	8.85058e-05	-2.99763	down		ENSOARG00000005436	0.52614	0.514902	0.887685	1.72428	1.76923	1.21235	0.00173959	1.15459	up		ENSOARG00000006446	0.0172616	0.661813	0.268458	10.2184	2.51026	12.0061	9.22752e-05	4.68447	up		ENSOARG00000006790	1.18492	0.41145	4.23375	3.59799	4.95596	5.33025e-11	2.39594	up
ENSOARG00000005674	0.0177198	0	0.0518202	0.176734	0.314324	0.0905836	0.0174092	2.95484	up		ENSOARG00000005443	27.3166	49.015	65.3723	19.5993	22.5754	18.7772	0.00341614	-1.33735	down		ENSOARG00000006548	4.50722	3.0973	4.85799	28.268	27.4692	17.1006	5.86785e-10	2.50942	up		ENSOARG00000006792	2.11916	2.46905	4.17532	3.52639	6.75124	0.0383276	1.05048	up
ENSOARG00000005693	0.125476	0.139646	0.235222	0.875159	0.540674	0.370059	0.0114984	1.73299	up		ENSOARG00000005456	9.89001	7.89751	4.00232	2.70022	3.21552	4.10381	0.0218439	-1.28156	down		ENSOARG00000006568	1.18843	0.825599	1.27906	0.262697	0.72915	0.425721	0.00034844	-1.27204	down		ENSOARG00000006797	0.94907	0.761085	0.100558	0.512531	0.387412	0.00412012	-1.40254	down
ENSOARG00000005827	3.01667	1.48356	0.825456	5.00663	5.29517	5.70407	6.36036e-06	1.49844	up		ENSOARG00000005516	271.33	379.053	655.225	138.403	242.13	268.277	0.0349139	-1.13885	down		ENSOARG00000006573	1.11517	0.789825	1.47451	2.82307	3.61277	3.48224	1.08174e-08	1.51059	up		ENSOARG00000007062	0.155024	0.0731031	0.00784772	0.0323222	0.0589937	0.040427	-1.82425	down
ENSOARG00000005855	15.2623	20.6463	25.4862	11.0232	13.5941	8.24803	0.00209309	-1.02089	down		ENSOARG00000005531	14.7298	13.9395	21.5049	8.7575	8.08558	10.2323	0.000206971	-1.02389	down		ENSOARG00000006626	1.30043	0.83796	1.24438	1.42625	2.43536	3.74136	0.0345787	1.12103	up		ENSOARG00000007070	12.0049	5.31607	16.3773	21.416	16.4166	0.00167997	1.03336	up
ENSOARG00000005951	16.1794	14.8568	28.5079	92.3366	65.1497	42.9862	0.00244753	1.64923	up		ENSOARG00000005557	0.669412	1.31044	0.726528	1.03738	2.49237	3.11744	0.0449265	1.16127	up		ENSOARG00000006707	0.0330192	0.0986464	0.0708311	0.323209	0.649748	0.491716	0.00119206	2.80527	up		ENSOARG00000007175	32.3583	4.20746	51.9245	53.4917	53.0135	0.000469846	1.50559	up
ENSOARG00000005972	0.27333	0.283109	0.300356	0.0630843	0.0835148	0.0677463	0.00255202	-2.11347	down		ENSOARG00000005573	3.612	3.77944	3.04484	5.5497	10.1175	7.75579	0.000888418	1.015	up		ENSOARG00000006711	47.147	66.2419	32.616	141.351	201.661	124.712	1.28528e-06	1.63359	up		ENSOARG00000007230	0.421632	0.650701	7.54419	4.09979	2.92093	0.00321479	3.17065	up
ENSOARG00000005978	0	0	0.0406946	0.32174	0.194874	0.177839	0.00397007	3.98676	up		ENSOARG00000005576	2.35134	2.15719	3.58474	1.35812	1.40442	1.5829	0.00102337	-1.03269	down		ENSOARG00000006721	0.0658077	0.851949	1.76459	0.0613485	0.0631686	0.0576469	0.0436096	-3.915	down		ENSOARG00000007274	327.598	305.726	46.8937	63.2474	57.4582	6.46339e-16	-2.52996	down
ENSOARG00000006037	2.65766	2.43082	2.65027	7.70929	6.90179	4.91039	0.000137706	1.22989	up		ENSOARG00000005579	0.344587	0.80629	0.782619	1.50177	1.66016	1.47176	0.00716238	1.14533	up		ENSOARG00000006732	0.691346	0.613265	0.467345	0.303294	0.200759	0.167943	0.00347167	-1.4303	down		ENSOARG00000007371	3.32958	1.82099	5.60914	7.82599	4.61431	0.00401768	1.19545	up
ENSOARG00000006043	8.66678	8.39342	3.3294	22.0031	12.7452	12.5749	0.0275022	1.11846	up		ENSOARG00000005605	0.66529	0.236318	0.812311	0.134478	0.0923115	0.126364	0.0034	-2.42556	down		ENSOARG00000006764	1.58536	1.35951	0.236169	2.25796	3.56492	2.25031	0.00539706	1.29336	up		ENSOARG00000007380	0.0375863	0.0299096	0.114163	0.238039	0.144821	0.00449378	2.26044	up
ENSOARG00000006050	8.33289	7.05952	56.3483	1930.55	17.2966	3789.94	0.003397	6.22796	up		ENSOARG00000005724	0.282668	0.323147	0.458691	1.03984	0.552253	0.925676	0.0462545	1.12166	up		ENSOARG00000006786	0.037548	0.119655	0.120819	0.450381	0.408478	0.385929	1.81326e-06	2.12774	up		ENSOARG00000007485	0.997519	0.612998	3.74684	3.75636	4.21255	1.22199e-11	2.25517	up
ENSOARG00000006068	11.4517	18.9831	20.7219	7.49963	6.78296	7.63583	0.00061181	-1.33967	down		ENSOARG00000005764	2.25172	1.19515	1.62945	3.94549	5.47658	3.97371	0.00267685	1.23522	up		ENSOARG00000006790	0.772123	1.09746	0.180689	4.23375	3.59799	4.95596	5.32733e-16	2.60199	up		ENSOARG00000007512	50.9451	67.085	28.0723	33.1497	19.6712	2.44157e-05	-1.15418	down
ENSOARG00000006119	3.15393	17.8309	9.11651	29.4425	33.8239	51.6635	0.000410402	1.79236	up		ENSOARG00000005813	0.640747	0.910399	0.660532	0.378704	0.405537	0.398556	0.0383614	-1.03556	down		ENSOARG00000006792	2.25113	1.67355	2.19653	4.17532	3.52639	6.75124	0.00474049	1.20171	up		ENSOARG00000007518	1.63699	0.959846	6.5161	7.71988	9.25818	9.76915e-07	2.56689	up
ENSOARG00000006175	0.179607	0.227374	0.0933777	0.57541	0.950207	0.867147	0.00200045	2.13651	up		ENSOARG00000005814	10.1987	9.10072	11.4019	27.6136	35.2918	32.1755	3.05199e-10	1.4861	up		ENSOARG00000006801	12.7775	30.9817	22.9074	39.1549	59.7974	103.566	0.0147141	1.55855	up		ENSOARG00000007542	0	0.031812	0.163923	0.196918	0.333737	0.0366717	3.8416	up
ENSOARG00000006214	0.0527366	0.312616	0.0171361	0.340031	0.547061	0.404385	0.0134678	1.59876	up		ENSOARG00000005827	1.84461	2.23468	1.38591	5.00663	5.29517	5.70407	1.38037e-06	1.41034	up		ENSOARG00000006835	145.7	134.314	108.701	67.9721	63.3966	53.2313	1.69917e-06	-1.11249	down		ENSOARG00000007561	0.414339	0.29607	2.15742	1.24559	0.955704	0.0135456	2.02145	up
ENSOARG00000006287	1.93661	0.539837	0.752291	2.49529	1.93039	2.58044	0.0254494	1.04223	up		ENSOARG00000005855	14.776	20.2128	29.2795	11.0232	13.5941	8.24803	0.00374361	-1.09554	down		ENSOARG00000006862	2.33292	1.63993	1.4719	3.17697	5.48864	3.48617	0.00157257	1.10829	up		ENSOARG00000007591	0.727639	0.81546	0.364667	0.490692	0.3193	0.0254484	-1.00545	down
ENSOARG00000006320	0	0	0	0.294064	0.0363346	0.0884228	0.0185023	Inf	up		ENSOARG00000005860	0.450489	0.0689963	0.290756	0.923679	0.448331	1.52541	0.0402665	1.66675	up		ENSOARG00000006885	0.308416	0.168925	0.198479	0.603786	0.799328	0.824016	0.0124673	1.67528	up		ENSOARG00000007592	3.06126	2.29425	1.04051	1.01059	0.839042	7.25011e-05	-1.4963	down
ENSOARG00000006321	0.0800541	0.0633404	0.0536508	0.181465	0.298958	0.170516	0.0316495	1.61184	up		ENSOARG00000005888	22.3648	17.5606	21.9916	9.76154	5.75273	6.19657	9.98232e-10	-1.64756	down		ENSOARG00000006897	0.289867	0.545253	0.310904	0.0500417	0.0927474	0.244516	0.0284267	-1.61181	down		ENSOARG00000007600	0.243934	0.0718934	1.04963	0.623032	0.673002	0.00037478	2.29408	up
ENSOARG00000006350	0.283664	0.256504	0.115216	1.15741	0.485526	0.644487	0.0372509	1.71379	up		ENSOARG00000005969	3.33366	5.20898	4.09758	1.67443	1.53254	1.74586	5.02974e-10	-1.4777	down		ENSOARG00000006901	1.23752	0.759818	0.874912	0.315163	0.378102	0.440144	4.01242e-05	-1.38487	down		ENSOARG00000007618	0.279129	0.483208	1.47252	1.39216	0.616365	0.0221499	1.58717	up
ENSOARG00000006370	0.154123	0.155761	0.0972143	0.353472	0.668668	0.278074	0.0331912	1.5544	up		ENSOARG00000005972	0.36916	0.213798	0.10207	0.0630843	0.0835148	0.0677463	0.0368064	-1.8528	down		ENSOARG00000006966	0	0	0	0.0613485	0.144385	0.115294	0.00021785	Inf	up		ENSOARG00000007620	22.4973	58.0965	10.8014	8.72038	12.8858	0.0261313	-1.91668	down
ENSOARG00000006409	0.0394391	0	0	0.0715197	0.276156	0.117608	0.0184977	3.49739	up		ENSOARG00000005978	0	0.0199551	0.0428706	0.32174	0.194874	0.177839	0.00693277	3.38818	up		ENSOARG00000007047	0.754979	0.678003	1.28696	0.226228	0.724702	0.206673	0.0249821	-1.29174	down		ENSOARG00000007644	0.0580961	0.0616406	0.179988	0.414262	0.278564	0.0262906	2.2451	up
ENSOARG00000006410	11.243	4.58551	9.15617	3.74806	5.03459	3.40583	0.0116935	-1.13301	down		ENSOARG00000006022	0	0.112006	0.140367	0.212458	0.382832	0.382641	0.043279	1.85988	up		ENSOARG00000007100	5.32805	7.80502	3.92474	13.4951	30.2116	10.7857	0.0284709	1.62081	up		ENSOARG00000007699	0.247211	0.184577	0.533952	0.635698	0.854516	0.0149837	1.61861	up
ENSOARG00000006446	0.266214	0.682052	0.173005	10.2184	2.51026	12.0061	0.000201745	4.34965	up		ENSOARG00000006037	2.76249	3.17353	2.62467	7.70929	6.90179	4.91039	0.000188901	1.05428	up		ENSOARG00000007178	0.69788	1.04247	1.51929	3.40111	3.05431	2.85088	2.42323e-09	1.4784	up		ENSOARG00000007707	0.0268663	0.0641372	1.32196	0.664836	0.934523	1.36604e-07	4.41091	up
ENSOARG00000006479	4.72571	2.27358	2.6577	6.41355	7.29674	9.91094	0.000334024	1.19716	up		ENSOARG00000006054	1.16222	1.68821	1.35627	2.69996	3.44044	3.88565	4.48306e-05	1.11938	up		ENSOARG00000007191	0.435243	0.758513	1.28378	2.13019	2.82007	2.95483	0.0452496	1.63245	up		ENSOARG00000007739	0.574487	0.26123	0	0	0	0.00811771	#NAME?	down
ENSOARG00000006548	3.36409	3.49999	4.81216	28.268	27.4692	17.1006	2.66265e-10	2.53117	up		ENSOARG00000006070	9.53223	10.543	8.65978	23.8235	24.6654	17.5205	2.77071e-06	1.06056	up		ENSOARG00000007230	0.711845	0.55965	0.361661	7.54419	4.09979	2.92093	0.000497294	3.12932	up		ENSOARG00000007766	0.0154426	0.00409621	0.175893	0.0217334	0.119002	0.0468197	3.43487	up
ENSOARG00000006626	0.629195	0.82972	0.293895	1.42625	2.43536	3.74136	0.00251611	1.99652	up		ENSOARG00000006108	0.0516513	0.26909	0.118248	0.249411	0.871963	1.43888	0.0240677	2.43057	up		ENSOARG00000007244	0.074829	0.0596147	0.0481558	0.16742	0.272947	0.314637	0.0356568	1.99972	up		ENSOARG00000007840	72.4507	46.3641	29.2271	19.8039	29.895	0.00227598	-1.19158	down
ENSOARG00000006678	4.41754	2.75692	5.69642	2.08075	2.24195	2.03201	0.00420782	-1.121	down		ENSOARG00000006119	4.18522	6.31884	17.4055	29.4425	33.8239	51.6635	6.51236e-05	1.92568	up		ENSOARG00000007270	0.0242335	0.00603322	0.0129961	0.0338871	0.0756004	0.159212	0.0298867	2.58373	up		ENSOARG00000007845	0.0115615	0.0122669	0.0368722	0.141017	0.0643452	0.0461799	2.71666	up
ENSOARG00000006707	0	0.122793	0.0165468	0.323209	0.649748	0.491716	0.000819256	3.2208	up		ENSOARG00000006128	1.56677	6.67719	6.0885	10.8661	10.5688	11.2767	0.000286179	1.08898	up		ENSOARG00000007274	356.925	391.93	290.323	46.8937	63.2474	57.4582	2.51272e-20	-2.67707	down		ENSOARG00000007852	0.408267	0.350666	0.0885752	0.0547219	0.0332923	0.00873905	-2.69976	down
ENSOARG00000006710	0	0	0	0.0504413	0.155814	0.0789964	0.00952764	Inf	up		ENSOARG00000006175	0.00966797	0.0915776	0.184445	0.57541	0.950207	0.867147	1.05402e-05	2.96465	up		ENSOARG00000007304	0.844588	0.344079	0.531177	0.68357	1.86097	1.9068	0.0245817	1.31688	up		ENSOARG00000007904	0.0618019	0.0421538	0.241347	0.128396	0.14741	0.040816	1.71895	up
ENSOARG00000006711	91.6091	36.624	79.7754	141.351	201.661	124.712	0.00150487	1.06995	up		ENSOARG00000006209	332.422	437.537	486.096	129.916	227.407	192.807	1.46477e-05	-1.32924	down		ENSOARG00000007348	18.8364	15.2853	17.5096	7.17313	6.97135	5.98361	6.13084e-11	-1.39756	down		ENSOARG00000008009	0.0761413	0.131279	1.18814	0.928707	1.60541	3.47469e-08	3.56276	up
ENSOARG00000006732	2.09659	2.25773	1.34505	0.303294	0.200759	0.167943	1.09186e-12	-3.18619	down		ENSOARG00000006214	0.345378	0.00560191	0.00601744	0.340031	0.547061	0.404385	0.0483133	1.60576	up		ENSOARG00000007380	0.0734768	0.0304882	0.0788093	0.114163	0.238039	0.144821	0.0261984	1.39148	up		ENSOARG00000008027	15.1326	5.40289	1.22757	2.2259	1.47271	0.0111677	-2.67829	down
ENSOARG00000006735	161.748	186.019	128.654	89.72	92.8154	60.068	0.000151863	-1.08583	down		ENSOARG00000006277	0.425557	0.225417	0.370329	1.10668	0.906433	0.602674	0.04582	1.20601	up		ENSOARG00000007404	2.18968	2.13103	0.0177924	0	0	0.00726568	7.6884e-05	-9.26919	down		ENSOARG00000008128	3.52176	2.62157	6.13286	6.7344	6.84454	0.00115699	1.07309	up
ENSOARG00000006764	0.814998	0.327539	0.632633	2.25796	3.56492	2.25031	2.64015e-05	2.0854	up		ENSOARG00000006352	5.13046	4.56608	4.62988	1.06029	2.19664	2.60482	1.39978e-05	-1.44381	down		ENSOARG00000007447	0.0125169	0.0186975	0	0.0875159	0.0300375	0.0767531	0.0293955	2.61112	up		ENSOARG00000008210	0.168935	0.0398314	0.367732	0.308197	0.35358	0.0488613	1.69628	up
ENSOARG00000006786	0.0591946	0.0511995	0.0677389	0.450381	0.408478	0.385929	5.9892e-07	2.70033	up		ENSOARG00000006383	0.0183261	0.0216987	0.0466165	0.123477	0.201306	0.0821859	0.0147588	2.09959	up		ENSOARG00000007475	0.509587	0.122282	0.414866	0.0973008	0.0707206	0.0268911	0.00672077	-2.45643	down		ENSOARG00000008290	0.0841162	0.160647	0.505873	0.520881	0.76344	0.011519	2.26395	up
ENSOARG00000006790	0.461883	0.456814	0.168843	4.23375	3.59799	4.95596	2.40912e-19	3.45191	up		ENSOARG00000006417	1.71138	1.84796	2.41423	6.55043	4.26426	4.43835	0.000474047	1.22708	up		ENSOARG00000007514	13.6294	11.1146	10.7215	6.91943	5.77243	4.08903	2.27049e-07	-1.11511	down		ENSOARG00000008304	3.08326	4.39353	1.39386	1.83886	1.45301	6.01361e-05	-1.2852	down
ENSOARG00000006792	0.771503	3.14661	0.971422	4.17532	3.52639	6.75124	0.0173156	1.42858	up		ENSOARG00000006446	0.422731	0.373275	0.74725	10.2184	2.51026	12.0061	0.000487102	3.88503	up		ENSOARG00000007518	1.89481	3.98354	2.12265	6.5161	7.71988	9.25818	0.000171604	1.51217	up		ENSOARG00000008361	48.1406	42.276	23.2526	19.7154	24.7071	7.24035e-05	-1.02235	down
ENSOARG00000006901	1.58169	1.74167	0.870398	0.315163	0.378102	0.440144	3.40155e-05	-1.99994	down		ENSOARG00000006464	1.3658	4.34709	2.59706	6.81832	9.79602	16.0672	0.00215589	1.86086	up		ENSOARG00000007520	0.778175	1.2867	0.803154	1.30033	3.86873	2.54663	0.0222119	1.37128	up		ENSOARG00000008430	34.2716	18.5811	4.08771	4.25733	4.7648	5.91759e-05	-2.61985	down
ENSOARG00000006966	0	0.0262209	0	0.0613485	0.144385	0.115294	0.00870425	3.43292	up		ENSOARG00000006548	3.30223	4.80613	5.99331	28.268	27.4692	17.1006	8.15276e-09	2.24541	up		ENSOARG00000007536	0	0	0	0.0907547	0.010383	0.0758034	0.00758492	Inf	up		ENSOARG00000008453	1.28936	1.74163	0.301977	0.335228	0.328093	8.6093e-08	-2.25886	down
ENSOARG00000007027	1.12993	1.63479	0.385514	4.40543	2.79553	2.26235	0.034307	1.47859	up		ENSOARG00000006586	1.38929	1.21974	0.913546	3.36436	2.76478	2.06436	0.00468677	1.07293	up		ENSOARG00000007542	0.0586127	0	0.0314333	0.163923	0.196918	0.333737	0.0307421	2.90238	up		ENSOARG00000008478	21.7344	26.133	69.091	52.3272	43.1369	0.00319355	1.18071	up
ENSOARG00000007182	22.3059	33.1933	20.3743	81.2715	73.4615	68.9355	3.53868e-07	1.44435	up		ENSOARG00000006608	1.68786	1.93357	3.45668	1.47323	1.54411	0.623987	0.028386	-1.0858	down		ENSOARG00000007561	0.768658	0.271618	0.425519	2.15742	1.24559	0.955704	0.0184215	1.543	up		ENSOARG00000008604	0	0	0.0278276	0.200572	0.130743	0.017388	Inf	up
ENSOARG00000007230	0.192602	0.801138	0.2253	7.54419	4.09979	2.92093	0.000227357	3.45167	up		ENSOARG00000006611	0.377857	0.068082	0.188054	0.0830193	0.00949804	0.00866779	0.0373313	-2.79426	down		ENSOARG00000007578	0.467423	0.725288	0.244844	0.851233	1.83645	1.05697	0.0137138	1.32761	up		ENSOARG00000008679	0	0	0.304917	0.282567	0.257867	0.00820792	Inf	up
ENSOARG00000007233	1.37238	3.59884	1.07025	11.2407	39.6341	106.794	0.0133838	4.56766	up		ENSOARG00000006627	0.300289	0.116363	0.604139	0.993251	0.978527	0.714394	0.00528821	1.25768	up		ENSOARG00000007600	0.218561	0.540838	0.277046	1.04963	0.623032	0.673002	0.0179088	1.14959	up		ENSOARG00000008682	34.7636	31.4496	151.227	100.661	61.8096	0.0278711	1.64644	up
ENSOARG00000007236	0	0.0329594	0.0236875	0.20931	0.0907454	0.113868	0.0226729	2.73771	up		ENSOARG00000006678	2.33598	3.88634	5.71485	2.08075	2.24195	2.03201	0.0238463	-1.02953	down		ENSOARG00000007615	8.97975	11.2677	10.846	21.8161	22.1263	21.3917	9.02588e-07	1.03239	up		ENSOARG00000008683	21.3239	8.96183	1.61501	1.32514	1.56498	0.000793486	-3.35373	down
ENSOARG00000007274	372.153	327.283	1624.37	46.8937	63.2474	57.4582	0.0290103	-3.90941	down		ENSOARG00000006711	92.3543	52.1442	27.6624	141.351	201.661	124.712	0.00381605	1.26397	up		ENSOARG00000007620	26.0508	28.1795	32.9802	10.8014	8.72038	12.8858	8.08174e-12	-1.46377	down		ENSOARG00000008762	0.314811	0.182192	0.432896	0.682034	0.676326	0.0297697	1.23451	up
ENSOARG00000007304	0.489443	0.360488	0.315511	0.68357	1.86097	1.9068	0.00304633	1.81921	up		ENSOARG00000006764	0.170606	0.432863	0.402976	2.25796	3.56492	2.25031	1.6797e-09	2.88348	up		ENSOARG00000007660	0.117009	0.156859	0.139982	0.0461495	0.038879	0.0670186	0.0492431	-1.48149	down		ENSOARG00000008801	69.3121	74.4698	7.08906	17.9422	7.14794	4.20994e-25	-2.78349	down
ENSOARG00000007326	0.0218555	0.466898	0.671107	0.0272479	0.0459103	0.0605181	0.0293224	-3.25908	down		ENSOARG00000006779	8.83638	13.6744	10.6395	9.99591	2.47921	3.69369	0.0113702	-1.13947	down		ENSOARG00000007707	0.0558029	0.0196134	0.0211245	1.32196	0.664836	0.934523	5.14515e-11	4.88933	up		ENSOARG00000008806	1.10338	2.70905	0.764443	0.607453	0.343544	0.0301401	-1.75205	down
ENSOARG00000007348	7.86181	26.2053	22.7428	7.17313	6.97135	5.98361	0.0217987	-1.62623	down		ENSOARG00000006786	0.0436391	0.0541306	0.0555029	0.450381	0.408478	0.385929	6.32261e-09	2.89159	up		ENSOARG00000007766	0	0.0037579	0.00404743	0.175893	0.0217334	0.119002	0.00202681	5.33198	up		ENSOARG00000008811	1.35796	1.17584	3.95395	3.50011	4.85138	8.20748e-05	1.67455	up
ENSOARG00000007399	0.626128	0.629086	0.559493	1.11966	1.48846	1.77821	0.0041924	1.16082	up		ENSOARG00000006790	0.332146	0.255282	0.51138	4.23375	3.59799	4.95596	6.46854e-24	3.4057	up		ENSOARG00000007845	0	0	0.0060604	0.0368722	0.141017	0.0643452	0.000841992	5.26679	up		ENSOARG00000008821	6.3133	10.3546	4.10693	4.34201	4.06224	0.00594319	-1.02078	down
ENSOARG00000007404	0.0170555	0.0385563	0.0498778	0	0	0.00726568	0.0365184	-3.98	down		ENSOARG00000006792	1.59626	2.57382	1.8239	4.17532	3.52639	6.75124	0.00767897	1.14412	up		ENSOARG00000007904	0.0129445	0.0601569	0.0694197	0.241347	0.128396	0.14741	0.0109025	1.83502	up		ENSOARG00000008862	2.13327	1.45144	10.251	8.40103	9.77173	3.42647e-13	2.38318	up
ENSOARG00000007412	2.04623	1.0648	1.86296	3.88571	3.6045	4.11177	0.00961888	1.12687	up		ENSOARG00000006901	1.13806	1.17373	0.582911	0.315163	0.378102	0.440144	0.00122199	-1.50336	down		ENSOARG00000007940	0.0833141	0.135766	0.0731132	0.282431	0.487108	0.40472	0.0037462	1.95826	up		ENSOARG00000008940	0.351468	0.10968	0.0565166	0.0193978	0.0708087	0.0484474	-2.24813	down
ENSOARG00000007475	0.0946869	0.313943	0.33844	0.0973008	0.0707206	0.0268911	0.0124997	-2.06056	down		ENSOARG00000006925	0.228739	0.245444	0.363655	0.642164	1.01662	0.475192	0.0265501	1.20871	up		ENSOARG00000008009	0.223271	0.444688	0.0598686	1.18814	0.928707	1.60541	3.2369e-06	2.31689	up		ENSOARG00000008964	0.070882	0.0948258	0.00842456	0.023132	0.0290262	0.0225928	-2.07153	down
ENSOARG00000007496	1.52738	0.748484	1.72905	0.589694	0.496792	0.570905	0.00620284	-1.36705	down		ENSOARG00000006954	0	0.0189404	0	0.107781	0.129475	0.0675186	0.0314062	3.93281	up		ENSOARG00000008077	50.6046	55.1031	51.5359	139.978	108.681	140.376	1.02044e-07	1.27187	up		ENSOARG00000009021	0	0.0247116	0.153864	0.223985	0.114667	0.000983498	3.70638	up
ENSOARG00000007512	64.5021	85.9805	168.199	28.0723	33.1497	19.6712	0.00529672	-2.09644	down		ENSOARG00000006966	0	0.0646847	0	0.0613485	0.144385	0.115294	0.0479996	2.22553	up		ENSOARG00000008115	22.6698	16.2404	16.192	40.8553	31.7444	48.7396	9.87932e-05	1.10233	up		ENSOARG00000009045	4.0083	3.16003	2.70924	0.904485	1.20338	0.0158932	-1.16063	down
ENSOARG00000007527	1.69575	0.944813	0.951748	3.30808	2.35877	2.67796	0.00295067	1.12726	up		ENSOARG00000007175	38.8664	12.9937	15.0711	51.9245	53.4917	53.0135	0.00906443	1.06202	up		ENSOARG00000008119	2.50879	3.6851	3.58782	0.896536	0.983339	1.75814	0.00060502	-1.46747	down		ENSOARG00000009085	3.09685	3.18892	1.69174	1.72051	1.2574	0.00252875	-1.03545	down
ENSOARG00000007536	0	0	0	0.0907547	0.010383	0.0758034	0.00778502	Inf	up		ENSOARG00000007230	1.02638	0.47874	0.395578	7.54419	4.09979	2.92093	0.00149456	2.77737	up		ENSOARG00000008133	0.11708	0.151572	0.138134	0	0	0	9.64444e-05	#NAME?	down		ENSOARG00000009104	0.133664	0.0917655	0.465691	0.339344	0.249091	0.0422611	1.62476	up
ENSOARG00000007568	0.0171983	0.0155516	0	0.124751	0.176622	0.029306	0.0385991	3.22476	up		ENSOARG00000007274	266.045	543.834	693.632	46.8937	63.2474	57.4582	7.82704e-07	-3.28529	down		ENSOARG00000008351	2.70438	2.2709	1.48637	1.11836	0.650223	1.16865	0.00197212	-1.17005	down		ENSOARG00000009108	0.947585	0.545096	2.15862	3.60981	2.61978	3.06091e-06	1.87388	up
ENSOARG00000007600	0.374525	0.141623	0.358453	1.04963	0.623032	0.673002	0.0128346	1.34016	up		ENSOARG00000007304	0.439807	0.709422	0.38913	0.68357	1.86097	1.9068	0.0158264	1.38903	up		ENSOARG00000008356	1.89165	1.81699	1.08641	2.1074	6.90256	6.12291	0.0133416	1.6006	up		ENSOARG00000009129	2.21576	2.6723	0.827944	0.613207	0.327574	5.80769e-05	-2.06586	down
ENSOARG00000007603	2.50236	4.24764	1.5712	5.08374	10.7678	14.0318	0.00634173	1.71478	up		ENSOARG00000007307	0.1127	0.0667203	0.122862	0.298316	0.279242	0.407733	0.0368341	1.55683	up		ENSOARG00000008426	73.9651	58.3739	56.1969	31.5434	43.823	20.582	8.55284e-05	-1.02019	down		ENSOARG00000009143	24.5027	64.4048	102.414	151.355	142.374	8.77735e-06	1.54368	up
ENSOARG00000007620	16.4953	44.5986	35.4459	10.8014	8.72038	12.8858	0.00807939	-1.69857	down		ENSOARG00000007320	0.269921	0.447434	0.666988	0.917997	1.25734	1.50549	0.00454491	1.28709	up		ENSOARG00000008430	19.3808	13.4165	5.53698	4.08771	4.25733	4.7648	0.0245429	-1.59062	down		ENSOARG00000009285	3.38173	6.03529	0.442466	1.61085	1.70762	0.00164572	-1.94708	down
ENSOARG00000007680	0	0	0	0.101479	0.10449	0.26819	2.40144e-05	Inf	up		ENSOARG00000007322	0.217848	0.450021	0.176855	0.775547	1.12012	0.56246	0.00254871	1.41043	up		ENSOARG00000008453	1.65	1.22984	2.05204	0.301977	0.335228	0.328093	1.19355e-10	-2.39348	down		ENSOARG00000009369	4.43754	4.00765	7.77416	10.5079	9.20486	0.00353774	1.09041	up
ENSOARG00000007703	0	0	0	0.0495203	0.0424912	0.0310216	0.0142325	Inf	up		ENSOARG00000007334	0.0488847	0.0836061	0.0898078	0.213484	0.351708	0.200603	0.0220031	1.65407	up		ENSOARG00000008458	2.6386	3.12511	3.29719	5.71964	8.29916	7.49517	1.06789e-05	1.20261	up		ENSOARG00000009426	1.57774	1.91314	0.521344	0.227738	0.987197	0.000447961	-1.60646	down
ENSOARG00000007707	0.111373	0.0610359	0.0592187	1.32196	0.664836	0.934523	4.70807e-08	3.57435	up		ENSOARG00000007380	0.0533727	0.0692136	0.0484877	0.114163	0.238039	0.144821	0.0309622	1.39094	up		ENSOARG00000008478	7.7457	18.9034	18.0386	69.091	52.3272	43.1369	3.67842e-06	1.8491	up		ENSOARG00000009492	1.32362	0.98997	2.15515	3.58312	2.86117	0.00189779	1.27818	up
ENSOARG00000007766	0.019399	0.0140333	0	0.175893	0.0217334	0.119002	0.0196664	3.17355	up		ENSOARG00000007512	76.0065	82.3958	96.4148	28.0723	33.1497	19.6712	1.33626e-14	-1.79296	down		ENSOARG00000008501	0.826916	1.28851	0.250427	2.03151	1.73692	1.51692	0.00766744	1.1221	up		ENSOARG00000009582	0.0203074	0.0215464	0.12953	0.647811	0.243429	0.0406313	3.97516	up
ENSOARG00000007771	4.79172	2.70629	3.56493	8.10152	10.9847	6.53142	0.000281449	1.10888	up		ENSOARG00000007518	1.3283	3.02134	2.62304	6.5161	7.71988	9.25818	0.000104255	1.63414	up		ENSOARG00000008537	0.516655	0.55925	0.750341	1.69025	0.745444	1.38586	0.0300476	1.03979	up		ENSOARG00000009791	3.32928	2.52591	0.797895	1.08687	0.757562	6.38073e-06	-1.76057	down
ENSOARG00000007806	1.23307	0.189341	0.226795	1.39228	1.868	3.15175	0.00738753	1.8902	up		ENSOARG00000007542	0.0243289	0	0.0618861	0.163923	0.196918	0.333737	0.0321666	2.86763	up		ENSOARG00000008620	0.0940557	0.118643	0.376625	1.1691	0.692176	2.25204	0.00304926	2.77213	up		ENSOARG00000009838	1.70661	2.31287	6.03735	6.70087	8.39909	6.89387e-07	1.78645	up
ENSOARG00000007839	0.31939	0.144404	0.124538	0.067572	0.0596372	0.0453535	0.0456477	-1.85569	down		ENSOARG00000007561	0.0137227	0.162482	0.130901	2.15742	1.24559	0.955704	7.61028e-06	3.74805	up		ENSOARG00000008645	0	0.00640765	0.00690133	0.0299918	0.0494106	0.0507279	0.0291934	3.24611	up		ENSOARG00000009884	1.47845	1.01257	2.59456	2.6275	3.59004	0.00102147	1.21482	up
ENSOARG00000007845	0.0232376	0	0.00566307	0.0368722	0.141017	0.0643452	0.0110139	2.98969	up		ENSOARG00000007600	0.324394	0.481744	0.132866	1.04963	0.623032	0.673002	0.018295	1.19251	up		ENSOARG00000008682	16.5945	32.6664	24.9505	151.227	100.661	61.8096	0.00198042	2.05081	up		ENSOARG00000009920	0.0856106	0.0538275	0.294701	0.600939	0.608137	1.32829e-05	2.81233	up
ENSOARG00000007879	0.0502787	0.00909292	0.00980244	0.0638235	0.225316	0.145648	0.0192324	2.56464	up		ENSOARG00000007603	1.7217	5.49211	2.44095	5.08374	10.7678	14.0318	0.014394	1.50912	up		ENSOARG00000008788	0.368462	0.86382	1.01271	1.76041	0.950529	2.73009	0.0479456	1.24684	up		ENSOARG00000009930	4.05468	3.58118	9.66603	14.6413	10.997	5.19981e-06	1.59475	up
ENSOARG00000007904	0.0221816	0.100289	0.0129737	0.241347	0.128396	0.14741	0.0227997	1.80136	up		ENSOARG00000007618	0.250336	0.282291	0.0758077	1.47252	1.39216	0.616365	0.000365293	2.36915	up		ENSOARG00000008801	62.9216	56.3361	84.9117	7.08906	17.9422	7.14794	3.76904e-14	-2.72086	down		ENSOARG00000009983	0.220362	0.282181	0.027696	0.0427765	0.0260249	0.00103513	-2.99491	down
ENSOARG00000007929	11.121	27.823	14.0699	70.418	85.4678	121.592	2.91373e-07	2.25773	up		ENSOARG00000007644	0.0565691	0.0446531	0.143896	0.179988	0.414262	0.278564	0.0366353	1.69096	up		ENSOARG00000008811	2.13593	2.12707	0.474553	3.95395	3.50011	4.85138	0.000324976	1.33698	up		ENSOARG00000009994	0.406958	0.348752	1.3692	0.748966	0.911329	0.0413879	1.40705	up
ENSOARG00000007940	0.031149	0.0352082	0.0227733	0.282431	0.487108	0.40472	2.26914e-05	3.60005	up		ENSOARG00000007699	0.185736	0.290291	0.387418	0.533952	0.635698	0.854516	0.0422301	1.10467	up		ENSOARG00000008852	1.52461	1.13871	0.554819	0.228423	0.3136	0.715469	0.0433896	-1.40216	down		ENSOARG00000010012	4.78028	3.38688	6.80373	10.1044	12.2926	0.00276201	1.2244	up
ENSOARG00000008009	0.0573892	0.164332	0.186479	1.18814	0.928707	1.60541	3.05786e-07	3.06642	up		ENSOARG00000007707	0.0408752	0.0871156	0.0381242	1.32196	0.664836	0.934523	4.95713e-09	4.02583	up		ENSOARG00000008862	0.598428	0.987032	1.04302	10.251	8.40103	9.77173	1.48859e-34	3.40031	up		ENSOARG00000010017	3.17307	3.03474	1.29295	2.50538	0.736616	0.0101074	-1.07296	down
ENSOARG00000008027	2.64814	5.02786	3.32847	1.22757	2.2259	1.47271	0.00673258	-1.29214	down		ENSOARG00000007710	0.387378	0.29188	0.474776	1.1864	1.53921	1.22629	0.0003253	1.62929	up		ENSOARG00000008946	27.0837	11.846	29.6011	9.09405	6.26233	7.28337	0.00352728	-1.6302	down		ENSOARG00000010041	35.3434	40.8543	73.8997	114.163	87.4663	1.41983e-05	1.24028	up
ENSOARG00000008077	66.8761	0.356421	0	139.978	108.681	140.376	2.32336e-06	2.49632	up		ENSOARG00000007766	0.0187959	0	0.0119529	0.175893	0.0217334	0.119002	0.019506	3.19955	up		ENSOARG00000008964	0.0542214	0.0659956	0.0936967	0.00842456	0.023132	0.0290262	0.027708	-1.87156	down		ENSOARG00000010063	0.0371687	0.0492955	0	0	0.00795622	0.0389777	-4.05187	down
ENSOARG00000008115	22.5813	12.2515	7.74232	40.8553	31.7444	48.7396	0.000103624	1.42362	up		ENSOARG00000007771	2.68465	4.23325	2.39949	8.10152	10.9847	6.53142	5.25526e-05	1.32342	up		ENSOARG00000009021	0.0455303	0.034006	0.054939	0.153864	0.223985	0.114667	0.0220217	1.82744	up		ENSOARG00000010152	1.48841	0.0924769	1.8511	2.10732	2.57754	0.012458	1.43576	up
ENSOARG00000008178	27.703	23.2387	18.236	45.8624	43.6727	63.9808	0.000131431	1.04734	up		ENSOARG00000007774	0.401334	0.939334	0.866563	1.83942	1.71053	1.31479	0.00284376	1.02745	up		ENSOARG00000009022	0.044324	0.15449	0.190163	0.289244	0.375827	0.375331	0.0343295	1.37856	up		ENSOARG00000010175	23.4719	36.6158	0.261739	0.269504	0.316216	1.46622e-21	-6.75453	down
ENSOARG00000008208	4.56234	4.46789	1.99075	10.4291	15.7977	6.267	0.00988597	1.44431	up		ENSOARG00000007779	30.1259	41.6691	67.7931	24.9883	20.6629	26.226	0.0186646	-1.07708	down		ENSOARG00000009025	0.601636	0.239655	0.38718	1.73869	1.61702	1.00135	0.0339294	1.78821	up		ENSOARG00000010184	1.89874	2.775	4.52044	7.62369	8.12081	0.000369497	1.50177	up
ENSOARG00000008233	8.15648	3.10595	5.32159	2.9304	1.61264	3.51684	0.0348867	-1.12106	down		ENSOARG00000007806	1.25861	0.867449	0.238922	1.39228	1.868	3.15175	0.0478048	1.26494	up		ENSOARG00000009035	0.293116	0.864021	0.490446	0.185813	0.168817	0.030812	0.00723743	-2.12981	down		ENSOARG00000010189	0.0358582	0.0380459	0.45744	0.179433	0.337731	0.00353727	3.12924	up
ENSOARG00000008263	0.496697	0.0799837	0.291838	0.018508	0.0444665	0.0753621	0.0167859	-2.73688	down		ENSOARG00000007809	1.15453	1.34877	1.62503	3.25853	3.92478	2.4609	0.000978429	1.0891	up		ENSOARG00000009097	7.27401	7.14581	3.95261	7.39598	19.9982	30.6676	0.0410115	1.6069	up		ENSOARG00000010392	1.54697	1.24885	2.72729	3.36037	2.56273	0.0287087	1.01877	up
ENSOARG00000008291	0	0	0	0.0902661	0.023236	0.106025	0.0442901	Inf	up		ENSOARG00000007903	0	0	0	0.0407418	0.0335604	0.0995371	0.00335964	Inf	up		ENSOARG00000009104	0.0768523	0.02296	0.0824299	0.465691	0.339344	0.249091	0.000672771	2.50005	up		ENSOARG00000010400	0.495916	0.0309513	4.56439	1.77514	7.65381	0.00309069	4.1309	up
ENSOARG00000008347	1.41341	0.671533	0.778422	0.745763	0.0596419	0.380999	0.0333131	-1.33305	down		ENSOARG00000007904	0.010746	0.0127236	0.0592255	0.241347	0.128396	0.14741	0.000897982	2.54383	up		ENSOARG00000009108	0.290137	0.516746	0.317178	2.15862	3.60981	2.61978	2.97352e-14	2.85187	up		ENSOARG00000010431	0.366568	0.38555	0.624471	0.744682	0.949784	0.0128746	1.01463	up
ENSOARG00000008356	0.15173	0.729666	0.121016	2.1074	6.90256	6.12291	1.90732e-05	3.75727	up		ENSOARG00000007929	52.6065	6.51963	9.21743	70.418	85.4678	121.592	0.00291172	1.80756	up		ENSOARG00000009129	1.68276	2.12575	0.768748	0.827944	0.613207	0.327574	0.0181985	-1.40491	down		ENSOARG00000010442	42.7276	40.322	93.1701	128.915	83.4185	3.83198e-05	1.26649	up
ENSOARG00000008358	0.619509	0.791575	0.577647	1.57524	2.92962	1.02122	0.0342331	1.34748	up		ENSOARG00000007940	0.0440134	0.230787	0.119955	0.282431	0.487108	0.40472	0.0238843	1.46408	up		ENSOARG00000009143	30.5572	57.751	15.0075	102.414	151.355	142.374	6.53601e-09	1.89224	up		ENSOARG00000010450	7.19544	2.71706	10.8226	12.3082	15.2678	0.000313202	1.34319	up
ENSOARG00000008368	0.0944406	0.0853981	0.0675119	0.265454	0.232183	0.144835	0.0477665	1.27366	up		ENSOARG00000007988	0.717335	0.863992	0.84943	1.62497	3.74679	1.81404	0.0136344	1.41528	up		ENSOARG00000009148	19.7349	32.1327	23.9454	3.27708	0.153916	0.302533	2.97682e-20	-4.33766	down		ENSOARG00000010659	0.892049	1.18309	6.35033	4.39403	13.7245	0.0123218	2.95632	up
ENSOARG00000008372	16.6542	26.974	36.5496	18.6418	13.8974	5.87667	0.0262066	-1.17387	down		ENSOARG00000007992	0.749417	0.745876	0.994597	0.43908	0.351639	0.424048	0.0438171	-1.16745	down		ENSOARG00000009272	43.0591	43.5529	48.1142	20.6151	20.304	23.1536	1.22671e-06	-1.11101	down		ENSOARG00000010665	0.126878	0.242315	0.0693675	0.0595213	0.00543184	0.0176169	-2.05904	down
ENSOARG00000008384	0.66338	0.399908	0.399179	1.3218	1.18516	1.37463	0.000675807	1.3137	up		ENSOARG00000008009	0.0308917	0.0822977	0.304497	1.18814	0.928707	1.60541	1.1767e-08	3.05638	up		ENSOARG00000009285	5.66163	3.88254	3.65442	0.442466	1.61085	1.70762	4.81351e-06	-1.86864	down		ENSOARG00000010676	4.42415	4.72397	1.05276	2.74965	2.34041	0.0113591	-1.19603	down
ENSOARG00000008389	1.45797	0.707657	0.642697	0.354791	0.465404	0.493225	0.0247973	-1.19093	down		ENSOARG00000008032	2.2039	2.01393	1.98234	1.09252	1.1479	0.960259	0.000121653	-1.0982	down		ENSOARG00000009308	11.7716	0.369947	14.0454	21.5149	20.8829	23.41	0.00198673	1.29113	up		ENSOARG00000010722	145.384	371.787	69.8397	48.4198	56.1871	0.0152822	-2.16674	down
ENSOARG00000008507	8.73309	8.23169	8.66172	13.635	20.9018	27.3967	0.00212141	1.16011	up		ENSOARG00000008077	0.742598	79.0078	36.9697	139.978	108.681	140.376	0.000349235	1.66016	up		ENSOARG00000009328	0.0231106	0.0276177	0.0198303	0.176666	0.0443677	0.141713	0.0112262	2.34123	up		ENSOARG00000010751	0.0471098	0.024992	0.386341	0.198902	0.342862	0.0248437	3.08883	up
ENSOARG00000008620	0.0967038	0.0874445	0.0691298	1.1691	0.692176	2.25204	0.000235983	3.92271	up		ENSOARG00000008079	0.388227	0.651205	0.740658	1.27157	1.78625	1.00708	0.0163934	1.06378	up		ENSOARG00000009369	2.71089	4.93649	3.95993	7.77416	10.5079	9.20486	0.000120231	1.20025	up		ENSOARG00000010787	22.9454	12.7586	66.6982	63.4324	42.0334	7.34751e-05	1.66346	up
ENSOARG00000008638	0.403692	0.0442472	0.488923	0.0221838	0.011421	0	0.00262574	-4.87191	down		ENSOARG00000008099	0.763628	1.22141	0.937151	2.03099	2.18419	2.26186	0.0233479	1.02011	up		ENSOARG00000009400	0	0	0	0.0177184	0.0121627	0.0332987	0.0323597	Inf	up		ENSOARG00000010847	2.99511	2.11856	5.84821	5.38609	6.19753	0.0152384	1.16328	up
ENSOARG00000008645	0	0.0119642	0	0.0299918	0.0494106	0.0507279	0.0336452	3.26797	up		ENSOARG00000008130	0.342737	0.231893	0.207578	0.531504	0.858652	0.706097	0.0320229	1.25732	up		ENSOARG00000009458	18.4358	33.6187	5.26674	46.0012	45.0093	45.6068	0.0020321	1.21274	up		ENSOARG00000010867	7.09978	7.6458	14.6833	17.5889	26.092	0.00222308	1.37494	up
ENSOARG00000008679	0.0336289	0	0	0.304917	0.282567	0.257867	0.00545097	4.61314	up		ENSOARG00000008183	5.56929	8.9274	12.2606	4.27504	4.90464	3.96828	0.00447492	-1.14792	down		ENSOARG00000009469	0.883815	1.80486	1.12795	0.333742	0.622855	0.882015	0.029062	-1.10148	down		ENSOARG00000010890	0.999995	1.23784	0.268688	0.396947	0.537884	0.0129165	-1.50747	down
ENSOARG00000008800	109.379	69.031	113.979	16.245	12.1504	5.72833	1.13771e-16	-3.19388	down		ENSOARG00000008208	2.24032	6.72946	4.83184	10.4291	15.7977	6.267	0.039473	1.11755	up		ENSOARG00000009492	0.975622	1.58408	0.86444	2.15515	3.58312	2.86117	0.00020589	1.28054	up		ENSOARG00000010944	0.135828	0	2.92916	2.76119	2.48106	2.86835e-07	5.30208	up
ENSOARG00000008806	1.61288	0.820376	1.17919	0.764443	0.607453	0.343544	0.016823	-1.16469	down		ENSOARG00000008210	0.0913857	0.108204	0.106544	0.367732	0.308197	0.35358	0.0270039	1.61856	up		ENSOARG00000009507	0	0	0.013725	0.0715752	0.0429909	0.29705	0.028003	4.8755	up		ENSOARG00000010958	29.6489	56.4508	10.0206	9.51866	7.10631	0.000379809	-2.29653	down
ENSOARG00000008811	1.9294	0.907794	0.672807	3.95395	3.50011	4.85138	4.66161e-05	1.72344	up		ENSOARG00000008212	0.33572	0.22595	0.166301	0.373034	0.735513	0.563079	0.0270366	1.02808	up		ENSOARG00000009562	0	0.0506679	0	0.237157	0.122097	0.869107	0.0336907	4.56314	up		ENSOARG00000011224	0.797228	0.839911	0.219978	0.352926	0.269198	0.00181499	-1.574	down
ENSOARG00000008862	1.09596	0.695456	0.449834	10.251	8.40103	9.77173	1.17118e-25	3.57232	up		ENSOARG00000008224	1.14822	0.311433	0.80417	0.0340812	0.239798	0.320249	0.0221508	-2.11945	down		ENSOARG00000009617	0	0	0	0.13528	0	0.152541	0.0412494	Inf	up		ENSOARG00000011235	4.15023	4.3727	1.86116	2.02511	1.97833	0.000342885	-1.14747	down
ENSOARG00000008899	0	0	0	0.122746	0	0.138408	0.0421343	Inf	up		ENSOARG00000008304	2.75397	4.87397	4.97034	1.39386	1.83886	1.45301	1.69143e-06	-1.55261	down		ENSOARG00000009651	0.149607	0.260726	0.351017	0.0871684	0.0448773	0.0655271	0.0151239	-1.97214	down		ENSOARG00000011253	5.8048	7.45146	16.1456	15.9493	18.103	2.71169e-06	1.31466	up
ENSOARG00000008940	0	0	0	0.0565166	0.0193978	0.0708087	0.0116697	Inf	up		ENSOARG00000008358	0.206607	0.334757	0.691516	1.57524	2.92962	1.02122	0.00574609	2.03665	up		ENSOARG00000009653	2.66375	4.74454	6.38352	2.02917	2.1186	2.54676	0.0232232	-1.08087	down		ENSOARG00000011333	0.0418754	0.0888605	0	0	0	0.0369281	#NAME?	down
ENSOARG00000008946	23.7412	26.7298	27.0829	9.09405	6.26233	7.28337	5.45455e-11	-1.88115	down		ENSOARG00000008372	44.6369	41.4105	27.9547	18.6418	13.8974	5.87667	3.20334e-05	-1.7104	down		ENSOARG00000009731	0.0339776	0.0676732	0.085035	0	0	0.0198427	0.0404352	-3.27559	down		ENSOARG00000011356	151.196	140.329	34.1282	22.602	31.7312	7.49476e-19	-2.32068	down
ENSOARG00000009085	3.80806	3.46419	1.8188	1.69174	1.72051	1.2574	0.00763423	-1.06653	down		ENSOARG00000008389	1.10796	0.942899	0.555962	0.354791	0.465404	0.493225	0.00894807	-1.14684	down		ENSOARG00000009764	0.195087	0.398268	0.204014	0.504682	0.388571	0.790385	0.0338804	1.04202	up		ENSOARG00000011362	11.5159	7.27881	3.54157	1.96705	2.67465	7.87455e-05	-1.79694	down
ENSOARG00000009093	0.237048	0.131908	0.0799882	0.0248001	0	0	0.000395479	-4.22089	down		ENSOARG00000008430	11.7147	12.4938	10.6354	4.08771	4.25733	4.7648	4.86852e-12	-1.55085	down		ENSOARG00000009838	1.62605	2.35916	1.26294	6.03735	6.70087	8.39909	6.58367e-11	1.96829	up		ENSOARG00000011372	0.508374	0.498936	0.683271	1.32361	1.74114	0.0410022	1.27915	up
ENSOARG00000009097	2.57259	3.26456	0.761779	7.39598	19.9982	30.6676	0.00230195	3.01383	up		ENSOARG00000008436	1.54852	1.69598	1.82179	4.82553	3.7601	3.12504	0.0104948	1.07816	up		ENSOARG00000009847	10.7398	6.95887	18.2597	28.7682	521.666	7655.87	0.0483776	7.78934	up		ENSOARG00000011453	23.1296	21.7653	53.6932	52.7673	74.5604	6.41038e-06	1.40454	up
ENSOARG00000009104	0.0553112	0.235786	0.053918	0.465691	0.339344	0.249091	0.0476295	1.47728	up		ENSOARG00000008453	0.327734	0.835797	1.03674	0.301977	0.335228	0.328093	0.0255621	-1.3006	down		ENSOARG00000009865	16.7778	29.226	83.0074	217.185	853.101	4291.1	0.0417317	5.33223	up		ENSOARG00000011599	10.7554	7.92424	18.3554	33.5863	30.5947	0.000277743	1.52643	up
ENSOARG00000009108	2.0193	0.648422	0.687835	2.15862	3.60981	2.61978	0.00434138	1.23181	up		ENSOARG00000008525	0.0682787	0.161689	0.148871	0.284792	0.53009	0.349949	0.0446656	1.49571	up		ENSOARG00000009920	0.0433893	0.114196	0.126318	0.294701	0.600939	0.608137	5.0284e-06	2.35705	up		ENSOARG00000011638	7.36441	14.1441	5.311	5.72721	4.19813	0.0288483	-1.10426	down
ENSOARG00000009148	64.879	73.1846	91.5541	3.27708	0.153916	0.302533	9.524e-50	-6.01268	down		ENSOARG00000008537	0.348985	0.34697	0.423532	1.69025	0.745444	1.38586	0.00216885	1.64676	up		ENSOARG00000009930	2.18512	6.8695	6.47966	9.66603	14.6413	10.997	0.000788812	1.14017	up		ENSOARG00000011782	0.62191	0.59863	1.8987	0.914354	1.81708	0.0214049	1.32751	up
ENSOARG00000009163	1.23183	1.32848	0.881321	3.50956	2.08908	1.83907	0.0332717	1.01162	up		ENSOARG00000008561	6.75809	8.40717	6.85362	26.496	17.3692	16.4794	0.000574915	1.32773	up		ENSOARG00000009956	2.63784	1.96849	2.12015	0.836471	1.14623	1.28242	0.00053772	-1.08778	down		ENSOARG00000011817	0.907675	1.00009	0.668027	0.379953	0.38261	0.0355366	-1.011	down
ENSOARG00000009199	0.334794	0.484381	0.320921	0.824675	1.05231	0.83672	0.0165009	1.13029	up		ENSOARG00000008620	0.171778	0.129431	0.383992	1.1691	0.692176	2.25204	0.00573139	2.46041	up		ENSOARG00000009984	0.0169542	0.0189944	0.0295501	0	0.00813717	0.00556941	0.0427307	-2.3262	down		ENSOARG00000011841	5.48951	4.8696	13.7464	14.0084	18.1776	5.68553e-08	1.54104	up
ENSOARG00000009208	8.32365	10.6294	20.3814	3.97443	5.58847	4.83493	0.0155867	-1.56987	down		ENSOARG00000008661	0.104129	0.455235	0.397315	1.71803	2.16725	1.17485	6.21274e-07	2.29726	up		ENSOARG00000009994	0.290684	0.274241	0.443056	1.3692	0.748966	0.911329	0.00892135	1.56049	up		ENSOARG00000011909	0.0121947	0.0258775	0.188903	0.0915328	0.281919	0.0125994	3.2872	up
ENSOARG00000009272	32.0519	45.0292	42.8418	20.6151	20.304	23.1536	9.35049e-05	-1.01965	down		ENSOARG00000008679	0	0	0.138139	0.304917	0.282567	0.257867	0.0408167	2.51967	up		ENSOARG00000010002	0.0627396	0.109339	0	0.102354	0.271006	0.370975	0.0361225	2.05823	up		ENSOARG00000011939	0.0887355	0.117687	0.370592	0.388525	0.40205	0.00166987	1.88472	up
ENSOARG00000009285	2.75366	3.27798	5.0458	0.442466	1.61085	1.70762	0.000892989	-1.68684	down		ENSOARG00000008683	11.6851	6.91775	13.2899	1.61501	1.32514	1.56498	3.37069e-08	-2.96792	down		ENSOARG00000010048	4.05096	6.68471	6.4965	1.75362	2.39754	2.9264	6.31093e-05	-1.32711	down		ENSOARG00000011993	0.0856579	0.272652	0.648172	0.387862	0.353958	0.0417336	1.3609	up
ENSOARG00000009294	72.5155	42.52	30.3697	124.513	102.55	112.959	2.17182e-05	1.13476	up		ENSOARG00000008743	0.389609	0.634301	0.426705	0.455747	0.0875968	0.14846	0.0281982	-1.1682	down		ENSOARG00000010079	1.05231	1.52121	1.11048	0.450947	0.676124	0.401436	0.00198649	-1.31531	down		ENSOARG00000012023	0.444012	0.699054	2.02294	1.14227	1.70466	0.00756895	1.49429	up
ENSOARG00000009298	6.23641	6.00311	4.77194	12.7685	18.0932	34.6802	0.00984352	1.83537	up		ENSOARG00000008788	0.618136	0.445172	0.1621	1.76041	0.950529	2.73009	0.00726885	1.99215	up		ENSOARG00000010099	21.021	15.8218	22.6271	70.1737	81.5584	62.4397	1.85143e-15	1.80711	up		ENSOARG00000012025	3.00078	7.87588	2.56987	1.05844	1.12047	0.0451971	-1.78383	down
ENSOARG00000009343	184.962	204.469	253.053	109.369	122.87	100.573	0.000129268	-1.06228	down		ENSOARG00000008801	10.5442	32.3775	28.7634	7.08906	17.9422	7.14794	0.0392247	-1.28078	down		ENSOARG00000010152	0.170386	0.881023	1.40578	1.8511	2.10732	2.57754	0.000655011	1.37356	up		ENSOARG00000012040	5.27977	10.8859	4.07397	4.06133	3.5396	0.0480424	-1.07496	down
ENSOARG00000009354	1.25258	0.377549	0.356133	1.49064	1.24251	2.31227	0.0482929	1.26932	up		ENSOARG00000008811	1.20322	0.389904	0.950413	3.95395	3.50011	4.85138	7.42891e-08	2.1108	up		ENSOARG00000010157	0.420361	0.827718	0.737784	0.0979691	0.110046	0.200854	0.000216277	-2.32055	down		ENSOARG00000012184	532.492	567.014	275.48	194.778	150.485	1.06681e-05	-1.42414	down
ENSOARG00000009361	1.68982	0.267195	0.783119	3.60019	2.74146	11.9033	0.0455509	2.66431	up		ENSOARG00000008861	0.37202	0.527007	0.430912	1.38012	1.1983	1.14964	0.00217706	1.35944	up		ENSOARG00000010184	1.71489	0.52547	1.97108	4.52044	7.62369	8.12081	1.05535e-07	2.21933	up		ENSOARG00000012228	0.452105	0.592557	1.05818	1.389	0.971558	0.0333254	1.09929	up
ENSOARG00000009403	0.451152	0.797366	0.359826	0.223126	0.143591	0.00873596	0.00266528	-2.21042	down		ENSOARG00000008862	2.59262	2.28853	2.93217	10.251	8.40103	9.77173	6.55422e-11	1.72581	up		ENSOARG00000010189	0.0467323	0.0814421	0	0.45744	0.179433	0.337731	0.00122573	2.89985	up		ENSOARG00000012332	19.7943	13.6873	38.4869	51.9735	29.0278	0.00319564	1.22267	up
ENSOARG00000009426	1.028	2.13486	1.02758	0.521344	0.227738	0.987197	0.0495575	-1.3859	down		ENSOARG00000008867	0.140908	0.220229	0.236565	0.632941	0.527892	0.434168	0.0206331	1.29568	up		ENSOARG00000010196	2.71891	2.73796	3.02243	7.70342	7.1936	6.7049	7.16242e-08	1.3117	up		ENSOARG00000012371	0.820252	0.821947	1.7772	1.94964	2.08356	0.00540384	1.21457	up
ENSOARG00000009463	1.37383	0.588268	0.757274	0.378209	0.503759	0.469505	0.0225677	-1.10295	down		ENSOARG00000009033	0.511817	1.18316	0.604464	1.50531	1.85996	1.77453	0.0288994	1.03814	up		ENSOARG00000010276	0.611063	0.91279	0.983117	0.44019	0.106647	0.21898	0.023707	-1.72592	down		ENSOARG00000012457	2.99706	5.2035	11.1224	14.2644	18.4298	2.01724e-05	1.80754	up
ENSOARG00000009490	0.468029	0.285314	0.343461	0.157349	0.166927	0.129934	0.0270297	-1.37086	down		ENSOARG00000009042	5.74935	5.35436	3.77752	15.1478	17.368	7.1713	0.0132745	1.26544	up		ENSOARG00000010285	0.100557	0.121909	0.14537	0.546157	0.226623	0.471075	0.00298124	1.73256	up		ENSOARG00000012475	3.65309	2.647	5.26564	7.04604	7.01865	0.00302029	1.00518	up
ENSOARG00000009492	1.48283	1.16338	0.85028	2.15515	3.58312	2.86117	0.00328251	1.18793	up		ENSOARG00000009085	2.46349	4.48859	3.03113	1.69174	1.72051	1.2574	0.00017716	-1.22015	down		ENSOARG00000010377	0.0899172	0.109443	0.0214318	0.279414	0.795982	0.201292	0.0353684	2.47028	up		ENSOARG00000012509	23.5231	40.1919	75.1815	108.43	150.938	0.00111004	1.78073	up
ENSOARG00000009507	0	0.0118968	0	0.0715752	0.0429909	0.29705	0.029379	4.95009	up		ENSOARG00000009104	0.0191399	0.0226623	0.14606	0.465691	0.339344	0.249091	0.000957825	2.38624	up		ENSOARG00000010380	14.6521	18.4027	14.3472	6.65657	7.92329	6.07979	1.12831e-08	-1.24018	down		ENSOARG00000012537	0.0956896	0.355347	2.26702	2.2445	1.18802	0.00113948	3.05548	up
ENSOARG00000009562	0.0523116	0	0.0254969	0.237157	0.122097	0.869107	0.048158	3.92199	up		ENSOARG00000009107	3.24409	7.45846	8.05177	12.8389	13.5476	18.7445	0.000222249	1.15221	up		ENSOARG00000010400	0.0203667	0.701763	1.03544	4.56439	1.77514	7.65381	0.00420388	2.96723	up		ENSOARG00000012668	0.510039	0.261559	1.40975	2.13748	2.47469	5.5564e-07	2.34977	up
ENSOARG00000009583	103.149	156.834	203.053	58.572	80.1137	62.3911	0.00183888	-1.32599	down		ENSOARG00000009108	0.546567	0.460685	1.50814	2.15862	3.60981	2.61978	6.8571e-05	1.60345	up		ENSOARG00000010475	0	0	0	0.520141	0.146065	0.133297	0.0213042	Inf	up		ENSOARG00000012671	16.9035	0	0	0	0.13098	0.0407453	-7.62534	down
ENSOARG00000009617	0	0	0	0.13528	0	0.152541	0.0421343	Inf	up		ENSOARG00000009119	0.715353	0.920654	1.97789	1.88605	6.00583	3.67577	0.0238787	1.53942	up		ENSOARG00000010485	0.019135	0.0571668	0.102619	0.44596	0.257147	1.35773	0.0242113	3.49274	up		ENSOARG00000012673	84.1147	70.2628	36.3791	32.0051	12.2106	3.52068e-06	-1.54091	down
ENSOARG00000009627	1.31004	1.01174	0.767318	2.66623	2.2939	1.80597	0.0039507	1.03215	up		ENSOARG00000009122	0	0	0	0.0829944	0.0854567	0.389934	0.0265286	Inf	up		ENSOARG00000010568	0.115831	0.0734045	0.0903543	0.0883489	0.485174	0.54423	0.0386095	1.93965	up		ENSOARG00000012688	0.574504	0.540981	0.837589	1.48232	1.27281	0.022078	1.07101	up
ENSOARG00000009651	0.480685	0.139091	0.281146	0.0871684	0.0448773	0.0655271	0.00704718	-2.26204	down		ENSOARG00000009143	67.624	16.2957	56.9286	102.414	151.355	142.374	0.000273504	1.31828	up		ENSOARG00000010659	0.381467	0.651229	0.672178	6.35033	4.39403	13.7245	0.000405237	3.80802	up		ENSOARG00000012703	0.890191	1.42485	2.82743	2.42928	1.98609	0.00242626	1.04269	up
ENSOARG00000009686	0.126593	0.0883067	0.116352	0.0459132	0.0303913	0.033898	0.0362114	-1.68202	down		ENSOARG00000009148	0.767958	36.2503	35.0714	3.27708	0.153916	0.302533	0.00690148	-4.31314	down		ENSOARG00000010676	5.06802	5.43099	7.38563	1.05276	2.74965	2.34041	3.13271e-05	-1.59475	down		ENSOARG00000012740	10.0948	20.4973	6.09524	7.675	7.21882	0.0350024	-1.15321	down
ENSOARG00000009731	0.104803	0.052649	0.102163	0	0	0.0198427	0.0116204	-3.80327	down		ENSOARG00000009226	0.795255	1.1247	0.716447	1.25274	2.09451	3.75291	0.0492599	1.28939	up		ENSOARG00000010701	0.16834	0.139107	0.134458	0.0233731	0.0756376	0.0721635	0.0384922	-1.42461	down		ENSOARG00000012744	0.244691	0.279091	0.055741	0.11479	0.0576155	0.0178072	-1.81873	down
ENSOARG00000009791	2.96996	1.65777	1.1527	0.797895	1.08687	0.757562	0.0232169	-1.22787	down		ENSOARG00000009261	1.32838	1.62563	1.62149	4.22489	4.26777	2.47418	0.000787607	1.12861	up		ENSOARG00000010787	16.7217	30.2549	13.3983	66.6982	63.4324	42.0334	7.89798e-05	1.47398	up		ENSOARG00000012846	0.288296	0.347869	1.02246	0.957327	0.817983	9.82419e-05	1.5318	up
ENSOARG00000009798	0.0457461	0.025456	0.0205818	0.0510505	0.423806	0.218864	0.0302538	2.79675	up		ENSOARG00000009285	1.95601	4.63195	7.30224	0.442466	1.61085	1.70762	0.0147676	-2.01143	down		ENSOARG00000010794	1.03769	1.33424	1.25389	0.159188	0.655645	0.379711	0.00175568	-1.66227	down		ENSOARG00000012952	0.0239649	0.0127135	0.207452	0.157394	0.0512986	0.0418095	2.9038	up
ENSOARG00000009838	1.71507	1.73331	1.16609	6.03735	6.70087	8.39909	1.05352e-08	2.08619	up		ENSOARG00000009308	10.7167	0.228218	10.3942	21.5149	20.8829	23.41	0.000270206	1.45242	up		ENSOARG00000010812	1.2106	1.35093	1.44581	2.62533	2.50542	3.76808	0.000321542	1.1124	up		ENSOARG00000013010	21.9213	21.3205	56.0712	52.5254	39.399	3.19405e-05	1.16988	up
ENSOARG00000009920	0.0573568	0.135425	0.111824	0.294701	0.600939	0.608137	3.03566e-05	2.1682	up		ENSOARG00000009323	9.88073	6.53635	10.5522	35.4883	29.1867	33.2542	4.31701e-14	1.71669	up		ENSOARG00000010867	3.66474	5.44841	3.08045	14.6833	17.5889	26.092	4.85117e-07	2.21619	up		ENSOARG00000013031	0.128375	0.465376	1.05279	0.562086	0.879348	0.0203661	1.47587	up
ENSOARG00000009930	25.1536	20.4946	44.6814	9.66603	14.6413	10.997	0.00777768	-1.46962	down		ENSOARG00000009458	27.643	3.12435	24.6037	46.0012	45.0093	45.6068	0.00492349	1.13201	up		ENSOARG00000010944	0.575309	0.0440709	0.189865	2.92916	2.76119	2.48106	4.75845e-06	3.29444	up		ENSOARG00000013079	0.798492	1.11348	0.488526	0.310374	0.283244	0.0179295	-1.4184	down
ENSOARG00000010048	6.78921	16.6178	20.0893	1.75362	2.39754	2.9264	0.00044851	-2.74811	down		ENSOARG00000009489	0.0242642	0.0287296	0.123443	0.299727	0.252506	0.358453	0.0461929	2.25694	up		ENSOARG00000011098	0.00673262	0.777742	0.0144425	1.40592	2.11974	0.973122	0.000800838	2.44727	up		ENSOARG00000013116	156.892	133.584	57.4087	78.0891	37.7577	2.78772e-05	-1.35816	down
ENSOARG00000010079	1.45713	0.749539	1.02917	0.450947	0.676124	0.401436	0.0187269	-1.18432	down		ENSOARG00000009492	1.2765	1.01109	0.98532	2.15515	3.58312	2.86117	0.00068873	1.23592	up		ENSOARG00000011311	0.417126	0.697863	0.483191	2.36428	1.72972	1.84161	0.000184435	1.85998	up		ENSOARG00000013148	0.370773	0.0724674	0.64903	0.649977	0.843792	0.0142331	1.66412	up
ENSOARG00000010152	0.235823	0.578804	0.374381	1.8511	2.10732	2.57754	2.25085e-08	2.33022	up		ENSOARG00000009507	0	0.00628896	0	0.0715752	0.0429909	0.29705	0.0177331	5.96209	up		ENSOARG00000011340	0.279034	0.260509	0.116908	0.577156	0.774237	0.305539	0.0197824	1.28968	up		ENSOARG00000013158	0.106855	0	0.22719	0.367605	0.289726	0.0422422	2.43104	up
ENSOARG00000010166	0.023614	0.0106765	0	0.139172	0.308648	0.0905363	0.0019472	3.87479	up		ENSOARG00000009521	7.70212	6.95599	11.083	17.4308	19.9586	19.4061	1.38402e-05	1.00332	up		ENSOARG00000011352	0.0894005	0.120826	0.123286	0.553634	0.251316	0.346819	0.00516276	1.76361	up		ENSOARG00000013161	0.137374	0.0672717	0.779945	0.961718	0.199055	0.0282949	2.6339	up
ENSOARG00000010169	0.00651006	0.0235469	0.0317304	0.578469	0.553086	0.820895	2.27531e-10	4.85503	up		ENSOARG00000009528	2.16952	2.43433	2.64911	0.855724	0.998594	1.15411	4.7971e-07	-1.40681	down		ENSOARG00000011362	6.99908	4.48491	4.969	3.54157	1.96705	2.67465	0.00178448	-1.03756	down		ENSOARG00000013171	0.182081	0.0845209	0.0103696	0.0106773	0	0.00251596	-4.26986	down
ENSOARG00000010175	19.0109	22.5603	0.200998	0.261739	0.269504	0.316216	0.00203549	-5.73425	down		ENSOARG00000009562	0.0211188	0.0250054	0	0.237157	0.122097	0.869107	0.0335193	4.5839	up		ENSOARG00000011429	0.00753592	0.00750464	0.00808284	0.00702528	0.101272	0.151832	0.0369336	3.43205	up		ENSOARG00000013180	8.66683	5.19323	14.1567	14.3629	16.4168	0.000104111	1.089	up
ENSOARG00000010184	2.76403	2.41902	2.30232	4.52044	7.62369	8.12081	5.47209e-05	1.32385	up		ENSOARG00000009563	4.96189	4.3809	6.80947	2.16002	2.6066	1.86163	1.31333e-05	-1.42556	down		ENSOARG00000011453	17.7969	27.0703	17.3204	53.6932	52.7673	74.5604	1.33373e-07	1.5021	up		ENSOARG00000013187	0.651043	0.833548	0.261819	0.320774	0.308306	0.00223655	-1.34663	down
ENSOARG00000010189	0.024024	0.0434475	0.0117094	0.45744	0.179433	0.337731	0.000464492	3.51397	up		ENSOARG00000009617	0	0	0	0.13528	0	0.152541	0.0410497	Inf	up		ENSOARG00000011482	9.14851	14.1201	11.1999	23.2148	24.1855	26.582	3.45089e-07	1.06243	up		ENSOARG00000013256	4.13198	3.5877	1.2297	2.82402	1.17498	0.00144022	-1.18453	down
ENSOARG00000010197	0.202031	0.430619	0.30948	0.700023	0.552382	1.05123	0.0301814	1.16981	up		ENSOARG00000009627	0.517529	0.865406	0.525426	2.66623	2.2939	1.80597	3.45226e-07	1.70147	up		ENSOARG00000011486	0	0	0	0.00328864	0.016931	0.0278119	0.0133315	Inf	up		ENSOARG00000013284	6.98462	6.47847	21.3646	25.1194	17.2273	7.86158e-09	1.63293	up
ENSOARG00000010239	2.69618	1.16986	0.853125	3.74584	3.07543	3.9598	0.00223442	1.10898	up		ENSOARG00000009651	0.302731	0.367635	0.276434	0.0871684	0.0448773	0.0655271	0.00209218	-2.3863	down		ENSOARG00000011499	4.12121	4.23793	3.19511	1.96273	2.73045	1.02026	0.00557698	-1.06162	down		ENSOARG00000013303	0.195583	0.196874	2.87432	1.11985	2.20279	0.000271127	3.38886	up
ENSOARG00000010283	3.16064	4.23344	1.69457	11.7139	34.6536	65.622	0.00585592	3.49902	up		ENSOARG00000009716	0.944214	1.356	1.03821	1.89489	3.27533	2.35265	0.00180275	1.03224	up		ENSOARG00000011501	2.29238	1.94777	0.924851	1.01951	0.894985	0.589535	0.0287107	-1.08226	down		ENSOARG00000013326	5.70086	8.60014	3.10862	2.9662	2.72339	0.000117026	-1.30596	down
ENSOARG00000010285	0.0943981	0.158525	0.166513	0.546157	0.226623	0.471075	0.0124024	1.46272	up		ENSOARG00000009764	0.161953	0.201345	0.272926	0.504682	0.388571	0.790385	0.00755861	1.27885	up		ENSOARG00000011599	11.0217	14.6188	6.8746	18.3554	33.5863	30.5947	0.000427316	1.29402	up		ENSOARG00000013357	0.646617	0.435855	1.79534	1.72013	1.76517	0.000165387	1.67977	up
ENSOARG00000010377	0.0821767	0.0464428	0.100133	0.279414	0.795982	0.201292	0.0366312	2.3592	up		ENSOARG00000009798	0.0426192	0.0269133	0.0289097	0.0510505	0.423806	0.218864	0.0379475	2.63265	up		ENSOARG00000011618	0	0.0473095	0	0.0221438	1.92667	0.551404	0.0332817	5.64548	up		ENSOARG00000013368	0.368046	0.242	0.826607	0.452315	1.11849	0.0412535	1.37454	up
ENSOARG00000010380	6.23533	24.5094	22.4905	6.65657	7.92329	6.07979	0.0459613	-1.50005	down		ENSOARG00000009805	0.0682301	0.173114	0.260338	0.251752	0.687498	0.473123	0.0449811	1.36839	up		ENSOARG00000011817	1.95184	1.93694	0.71003	0.668027	0.379953	0.38261	0.00669392	-1.71474	down		ENSOARG00000013390	0.373142	0.164339	0.943046	0.726617	0.584735	0.011912	1.46591	up
ENSOARG00000010400	0.95487	0.117398	0.0367428	4.56439	1.77514	7.65381	0.00139406	3.61199	up		ENSOARG00000009838	0.523661	0.936938	1.12484	6.03735	6.70087	8.39909	1.75741e-17	2.91046	up		ENSOARG00000011839	0.0557935	0.119672	0.0644459	0.652161	0.354293	0.379717	6.23198e-05	2.50341	up		ENSOARG00000013395	5.3119	6.19959	1.77476	1.07983	1.06125	0.00189851	-2.15258	down
ENSOARG00000010450	8.06792	5.05398	4.24786	10.8226	12.3082	15.2678	0.000463195	1.04618	up		ENSOARG00000009876	3.91389	3.95836	7.15577	11.171	11.1882	11.3	0.00142602	1.03311	up		ENSOARG00000011840	2.03452	1.2295	2.14487	3.11246	4.74044	6.42817	0.00161521	1.35491	up		ENSOARG00000013399	0.250717	0.603397	0.100297	0.0975357	0.198963	0.0360478	-1.71202	down
ENSOARG00000010467	0	0	0	0.219149	0.169238	0.154444	0.0441595	Inf	up		ENSOARG00000009902	0	0	0	0	0.0466777	0.0709958	0.0198466	Inf	up		ENSOARG00000011841	5.33368	5.84508	7.2303	13.7464	14.0084	18.1776	2.3114e-09	1.28003	up		ENSOARG00000013432	0.072931	0.0580355	2.77451	2.66865	0.327839	0.00601673	4.85691	up
ENSOARG00000010493	3.12252	2.64169	5.35514	2.01065	1.75408	1.61427	0.0140493	-1.15265	down		ENSOARG00000009920	0.0283014	0.0639733	0.0294508	0.294701	0.600939	0.608137	3.7131e-09	3.49609	up		ENSOARG00000011909	0	0.0118701	0.0127847	0.188903	0.0915328	0.281919	0.000387983	4.48425	up		ENSOARG00000013440	7.25132	3.51979	9.10622	14.2459	16.4596	0.00491835	1.27097	up
ENSOARG00000010629	0.466076	0.234546	0.304207	0.643081	0.752971	1.00483	0.0079112	1.16111	up		ENSOARG00000009970	0.913673	0.784616	0.740658	2.42412	2.10132	1.27136	0.0112216	1.10581	up		ENSOARG00000011916	0.783479	0.653704	0.84791	0.0329004	0.66398	0.129844	0.00641792	-1.54492	down		ENSOARG00000013538	2.35991	1.50758	3.68152	4.09215	4.53846	0.00508442	1.06123	up
ENSOARG00000010659	0.616325	0.683975	0.3004	6.35033	4.39403	13.7245	0.000450088	3.82941	up		ENSOARG00000009983	0.49943	0.248218	0.101947	0.027696	0.0427765	0.0260249	0.0135184	-3.32553	down		ENSOARG00000011939	0.202379	0.140357	0.0813998	0.370592	0.388525	0.40205	0.0044617	1.41088	up		ENSOARG00000013564	0.107952	0.0588169	0.84808	0.454414	0.669504	6.01937e-06	2.96646	up
ENSOARG00000010665	0.204012	0.132594	0.149155	0.0693675	0.0595213	0.00543184	0.0217648	-1.95091	down		ENSOARG00000009994	0.17781	0.180457	0.419992	1.3692	0.748966	0.911329	0.00284962	1.84545	up		ENSOARG00000011955	2.56612	3.48872	3.01545	6.71352	10.3117	8.83733	2.10729e-10	1.4656	up		ENSOARG00000013671	20.5429	56.6639	3.136	8.9013	9.12721	0.0161809	-2.48724	down
ENSOARG00000010671	0.46961	0.107657	0.154743	0.569733	0.500184	0.755135	0.029616	1.24484	up		ENSOARG00000010002	0.0260419	0.0462517	0.0828042	0.102354	0.271006	0.370975	0.0285329	2.13538	up		ENSOARG00000011986	24.9435	29.7218	20.3617	43.1911	50.6544	64.8351	2.90488e-05	1.03816	up		ENSOARG00000013745	103.474	43.9436	122.517	165.059	178.814	0.00446603	1.04855	up
ENSOARG00000010676	3.45492	4.4301	7.39833	1.05276	2.74965	2.34041	0.0102558	-1.44321	down		ENSOARG00000010017	5.50302	3.39206	2.37531	1.29295	2.50538	0.736616	0.0240312	-1.4908	down		ENSOARG00000011993	0.240256	0.130505	0.183508	0.648172	0.387862	0.353958	0.00920644	1.29682	up		ENSOARG00000013765	2.54905	1.46259	7.0734	3.88007	5.02452	0.01144	1.39676	up
ENSOARG00000010794	0.702267	0.879267	2.08006	0.159188	0.655645	0.379711	0.0485497	-1.75162	down		ENSOARG00000010025	46.7803	50.6875	13.4387	67.9761	88.8202	126.643	0.0117274	1.19865	up		ENSOARG00000012014	12.1146	17.3381	18.121	34.2089	29.8255	41.7513	2.07221e-06	1.11651	up		ENSOARG00000013806	8.26281	12.4635	3.21166	2.43526	1.78487	8.98366e-07	-2.07982	down
ENSOARG00000010812	1.01517	0.981829	1.25636	2.62533	2.50542	3.76808	0.000373097	1.3443	up		ENSOARG00000010041	52.322	43.7464	18.1771	73.8997	114.163	87.4663	0.00211987	1.10467	up		ENSOARG00000012022	0.00635498	0.0063286	0.0272648	0.0710923	0.0732016	0.0835035	0.0249597	2.47551	up		ENSOARG00000013845	210.089	89.2411	449.216	562.69	370.408	4.25243e-05	1.59531	up
ENSOARG00000010843	0.249249	0.106063	0.0571696	0.37223	0.684418	0.649575	0.0025626	1.95487	up		ENSOARG00000010048	4.46448	5.79245	7.37589	1.75362	2.39754	2.9264	3.59102e-07	-1.44959	down		ENSOARG00000012023	0.517994	1.03169	0.720762	2.02294	1.14227	1.70466	0.0204608	1.07186	up		ENSOARG00000013870	0.255777	0.169614	0.514688	1.06991	0.702636	0.00876	1.80673	up
ENSOARG00000010845	3.22837	2.20181	1.25349	7.56607	4.80204	4.77855	0.00403765	1.26999	up		ENSOARG00000010152	0.631072	0.463786	0.539704	1.8511	2.10732	2.57754	2.38366e-07	1.8481	up		ENSOARG00000012166	0.0662929	0.143038	0.154059	0.731309	0.265143	0.387146	0.0187016	1.90945	up		ENSOARG00000014010	0.310574	0.329523	0.0101071	0.208139	0.00949723	0.0150676	-2.14222	down
ENSOARG00000010944	0.546006	0.0822878	0.665316	2.92916	2.76119	2.48106	0.000479101	2.57273	up		ENSOARG00000010157	0.142759	0.488312	0.57497	0.0979691	0.110046	0.200854	0.0304207	-1.66752	down		ENSOARG00000012169	40.2231	54.0683	46.265	15.6846	10.8833	11.3482	1.20844e-18	-1.92217	down		ENSOARG00000014199	16.9901	119.565	4.33435	3.90816	3.7353	0.046194	-4.11344	down
ENSOARG00000010958	13.1977	14.0843	28.5644	10.0206	9.51866	7.10631	0.0372479	-1.17824	down		ENSOARG00000010166	0.0285998	0.0225754	0.0485	0.139172	0.308648	0.0905363	0.0247293	2.28253	up		ENSOARG00000012241	0.182768	0.0488319	0.100407	0.00831141	0.047069	0.0312397	0.0320735	-2.00326	down		ENSOARG00000014237	0.0108879	0	0.674635	1.30758	1.50092	4.61351e-11	7.70155	up
ENSOARG00000010986	46.7545	48.0066	101.478	28.1761	21.7362	28.0475	0.0197447	-1.43828	down		ENSOARG00000010175	31.4655	0.275972	27.6539	0.261739	0.269504	0.316216	0.000983337	-6.30871	down		ENSOARG00000012277	0.296003	0.263415	0.303975	0.0821964	0.120907	0.14344	0.0394774	-1.36243	down		ENSOARG00000014240	21.3627	40.7505	1.1433	3.2259	3.82291	6.67662e-06	-3.54247	down
ENSOARG00000010989	0.640202	0.326561	0.416051	0.133957	0.122605	0.174825	0.0102052	-1.77262	down		ENSOARG00000010189	0.0290964	0.0574185	0.0616777	0.45744	0.179433	0.337731	0.00267542	2.61446	up		ENSOARG00000012332	15.8452	24.363	17.2729	38.4869	51.9735	29.0278	0.00250663	1.01157	up		ENSOARG00000014321	0.411549	0.454125	0.855016	1.03999	1.05244	0.0117714	1.15756	up
ENSOARG00000011098	0.00692218	0.00625939	0.00674781	1.40592	2.11974	0.973122	7.25274e-17	7.70332	up		ENSOARG00000010223	1.31242	1.73989	1.35534	3.48925	4.08564	2.97096	0.00207886	1.12284	up		ENSOARG00000012426	79.2977	109.507	88.5344	42.3939	37.8793	31.7508	5.27772e-10	-1.3442	down		ENSOARG00000014336	51.0748	22.3877	6.34075	5.99533	6.22724	0.00235577	-2.59156	down
ENSOARG00000011311	0.840585	0.682539	0.50168	2.36428	1.72972	1.84161	0.00771334	1.45428	up		ENSOARG00000010285	0.0798489	0.128923	0.249276	0.546157	0.226623	0.471075	0.0214658	1.33785	up		ENSOARG00000012457	0.58589	5.19808	1.14257	11.1224	14.2644	18.4298	1.69844e-08	2.61866	up		ENSOARG00000014374	0.166818	0.0707983	0	0	0	0.0243992	#NAME?	down
ENSOARG00000011315	1.18028	1.11746	0.814495	3.96281	2.94027	1.28189	0.0455201	1.29415	up		ENSOARG00000010334	2.37528	0.863942	1.731	0.668291	0.712053	0.748101	0.0290122	-1.39016	down		ENSOARG00000012475	1.35611	2.92398	2.66886	5.26564	7.04604	7.01865	4.62856e-07	1.43333	up		ENSOARG00000014413	397.59	614.751	1461.01	3695.89	2826.72	0.000770601	2.35841	up
ENSOARG00000011350	18.7706	32.7868	13.777	7.79745	12.9325	8.82729	0.0344013	-1.2744	down		ENSOARG00000010347	0.0104987	0.0124308	0.0667643	0.153265	0.279207	0.177253	0.00992376	2.64398	up		ENSOARG00000012509	35.9559	45.3815	9.79409	75.1815	108.43	150.938	0.00029299	1.82906	up		ENSOARG00000014427	0.0367436	0.0389853	0.0502216	0.655013	0.739331	0.0436092	3.6239	up
ENSOARG00000011352	0.124745	0.112801	0.0448011	0.553634	0.251316	0.346819	0.00634569	1.9375	up		ENSOARG00000010377	0.107821	0.0491015	0.0527438	0.279414	0.795982	0.201292	0.0378713	2.41631	up		ENSOARG00000012537	0.561185	0.512285	0.200638	2.26702	2.2445	1.18802	0.0045129	2.12129	up		ENSOARG00000014440	39.3137	35.5085	16.5959	12.3978	8.35545	3.77538e-10	-1.60282	down
ENSOARG00000011357	38.8275	46.1461	62.6956	23.8025	26.4895	21.5788	0.000224726	-1.1536	down		ENSOARG00000010382	0.134276	0.291478	0.0925065	0.0628283	0.0129385	0.0472299	0.0121805	-2.17785	down		ENSOARG00000012688	0.421158	0.594164	0.677585	0.837589	1.48232	1.27281	0.00802358	1.03805	up		ENSOARG00000014462	1.2935	0.633426	0.0906655	0.373421	0.212987	0.030413	-2.13869	down
ENSOARG00000011417	0.0165517	0.0399117	0.021513	0.125063	0.180283	0.0611091	0.0256215	2.0971	up		ENSOARG00000010394	14.8817	14.1084	7.07666	37.5638	24.6167	29.901	0.000936162	1.20867	up		ENSOARG00000012703	1.24301	1.01009	1.2639	2.82743	2.42928	1.98609	0.000359278	1.00641	up		ENSOARG00000014509	0.695927	1.50209	2.975	2.15286	3.41861	0.00127167	1.35821	up
ENSOARG00000011418	0.0058124	0.189211	0.781906	0.943359	1.24267	1.31233	0.00131366	1.71098	up		ENSOARG00000010400	1.25793	0.0920881	0.339765	4.56439	1.77514	7.65381	0.00724562	2.85132	up		ENSOARG00000012744	0.292984	0.16077	0.307834	0.055741	0.11479	0.0576155	0.0103648	-1.79111	down		ENSOARG00000014523	0.157332	0.355636	0.0373988	0.0577626	0.0585704	0.00524436	-2.3512	down
ENSOARG00000011429	0.00774809	0.00700622	0.00755292	0.00702528	0.101272	0.151832	0.0381895	3.41943	up		ENSOARG00000010659	0.361918	0.589219	1.35216	6.35033	4.39403	13.7245	0.0011965	3.29808	up		ENSOARG00000012748	0.50704	1.67109	0.582683	0.821567	7.10359	10.9031	0.0386229	2.71173	up		ENSOARG00000014535	3.05388	2.39357	6.62916	4.79241	5.18746	0.00128861	1.00709	up
ENSOARG00000011444	8.8501	2.57644	4.73333	1.58662	2.84827	1.99826	0.0441048	-1.42224	down		ENSOARG00000010671	0.21896	0.107496	0.190186	0.569733	0.500184	0.755135	0.00220915	1.66577	up		ENSOARG00000012846	0.386773	0.269617	0.160011	1.02246	0.957327	0.817983	2.26446e-07	1.73728	up		ENSOARG00000014554	0.23343	0.968171	2.04968	2.39919	1.73523	0.000185825	1.75611	up
ENSOARG00000011448	1.04488	0.417485	0.532968	1.24485	1.70148	1.71837	0.0253874	1.13254	up		ENSOARG00000010676	4.87035	5.60422	4.74033	1.05276	2.74965	2.34041	0.000341954	-1.46011	down		ENSOARG00000012900	546.12	869.111	925.463	143.427	246.902	287.859	8.32712e-07	-1.83368	down		ENSOARG00000014630	24.8384	42.783	19.0022	15.8427	15.4564	0.0144138	-1.02936	down
ENSOARG00000011449	8.91944	3.3371	5.16098	14.6703	13.9367	15.1195	8.30889e-07	1.24126	up		ENSOARG00000010751	0.133792	0	0.0243093	0.386341	0.198902	0.342862	0.0325894	2.33976	up		ENSOARG00000012927	1.2943	2.19818	1.74337	2.75928	3.3227	5.08891	0.00691282	1.05136	up		ENSOARG00000014638	40.1342	26.3043	18.3775	13.3065	17.4421	0.00310929	-1.03765	down
ENSOARG00000011450	0.797389	0.352509	0.362741	0.176734	0.181977	0.150973	0.0425339	-1.65883	down		ENSOARG00000010773	1.28259	1.54728	2.73162	0.760917	1.00035	0.855452	0.010156	-1.21764	down		ENSOARG00000012961	0	0.0283775	0	0.0531298	0.150442	0.0499241	0.0475987	3.10118	up		ENSOARG00000014652	0.0444213	0.0549868	0.290086	0.180605	0.22187	0.0186584	2.20242	up
ENSOARG00000011453	11.1033	10.0089	11.9026	53.6932	52.7673	74.5604	2.73731e-14	2.34883	up		ENSOARG00000010812	1.20457	1.21526	0.66177	2.62533	2.50542	3.76808	5.42146e-05	1.38283	up		ENSOARG00000013010	11.1773	21.4638	14.3561	56.0712	52.5254	39.399	2.24634e-08	1.6181	up		ENSOARG00000014659	0.0994677	0.0234525	0.986923	1.15101	5.99008	0.0470419	5.43517	up
ENSOARG00000011486	0	0	0	0.00328864	0.016931	0.0278119	0.0145036	Inf	up		ENSOARG00000010845	2.82757	2.09246	1.93862	7.56607	4.80204	4.77855	0.00416878	1.17777	up		ENSOARG00000013031	0.397351	0.22909	0.358895	1.05279	0.562086	0.879348	0.0160575	1.31059	up		ENSOARG00000014674	79.9897	31.3537	513.558	429.284	318.753	5.40557e-09	2.89798	up
ENSOARG00000011501	0.353178	0.417126	0.154575	1.01951	0.894985	0.589535	0.0146322	1.32776	up		ENSOARG00000010864	2.33468	2.8872	1.93161	1.0646	1.118	1.10488	4.01299e-05	-1.25981	down		ENSOARG00000013284	9.21082	9.53041	8.6291	21.3646	25.1194	17.2273	3.1586e-08	1.17705	up		ENSOARG00000014704	3.12145	2.94328	2.14401	0.365467	0.247887	0.0082515	-1.70928	down
ENSOARG00000011604	0.115439	0.260965	0.176835	0.269151	0.56967	0.66038	0.0470276	1.30321	up		ENSOARG00000010897	0.954768	1.14347	1.33995	3.4137	2.38562	2.06128	0.00682364	1.06866	up		ENSOARG00000013293	0.00712549	0.00709591	0.00764262	0.730693	0.00683974	0.374512	0.0116358	5.66322	up		ENSOARG00000014785	39.4885	39.8773	79.3275	117.868	78.9203	0.000109136	1.18488	up
ENSOARG00000011638	9.27096	11.8279	9.38466	5.311	5.72721	4.19813	7.18452e-05	-1.11581	down		ENSOARG00000010930	0.104466	0.118743	0.159439	0.197083	0.434851	0.414477	0.0234468	1.30824	up		ENSOARG00000013303	0.333324	0.341703	0.404833	2.87432	1.11985	2.20279	0.00035415	2.49669	up		ENSOARG00000014887	2.47691	2.44756	3.40968	7.45057	9.40251	0.0353913	1.42282	up
ENSOARG00000011756	22.9129	27.8647	26.905	4.64009	5.50368	4.04063	1.38575e-22	-2.56938	down		ENSOARG00000010944	1.43279	0.0869987	0.280356	2.92916	2.76119	2.48106	0.00315322	1.96812	up		ENSOARG00000013346	1.65106	3.87931	1.97841	3.39102	17.4581	34.6663	0.0409104	2.83223	up		ENSOARG00000014980	0.0442079	0.018762	0.120848	0.340117	0.227112	0.0017016	2.82504	up
ENSOARG00000011783	0.0453686	0.355547	0.663387	0.0205681	0.00705944	0.0579812	0.0216701	-3.7564	down		ENSOARG00000010949	0.555006	0.0121694	0.37909	0.0577086	0.0118841	0.0433813	0.0455869	-3.23107	down		ENSOARG00000013357	0.394089	0.68124	0.510418	1.79534	1.72013	1.76517	5.94954e-06	1.6978	up		ENSOARG00000015052	0.0622993	0.207744	0.00810965	0.0250508	0.0304814	0.0384689	-2.70501	down
ENSOARG00000011817	2.39973	0.95808	1.96308	0.668027	0.379953	0.38261	0.000333621	-1.97656	down		ENSOARG00000010957	2.59505	3.75543	4.28789	0.846848	0.974557	1.67342	3.75582e-06	-1.73411	down		ENSOARG00000013390	0.371605	0.253562	0.162382	0.943046	0.726617	0.584735	0.00297608	1.48176	up		ENSOARG00000015074	66.3731	49.6752	28.7527	30.5974	28.3753	0.000118167	-1.01191	down
ENSOARG00000011824	14.6044	9.41386	11.4529	4.56687	6.02059	4.3362	1.72222e-06	-1.35335	down		ENSOARG00000011024	0.191399	0.294609	0.186632	0.623309	0.715572	0.727076	0.00659404	1.48648	up		ENSOARG00000013421	1.46955	1.40024	1.09968	1.62485	2.93371	3.80206	0.0189423	1.02584	up		ENSOARG00000015112	1.16281	0.48573	1.76871	2.72319	2.52435	0.000529435	1.47419	up
ENSOARG00000011839	0.0970781	0.183546	0.0903312	0.652161	0.354293	0.379717	0.00214313	1.7901	up		ENSOARG00000011059	0.0537854	0.0358221	0.0342038	0.128348	0.147704	0.120604	0.0472366	1.52097	up		ENSOARG00000013432	0.0178214	0.106485	0.726363	2.77451	2.66865	0.327839	0.0238755	2.73198	up		ENSOARG00000015164	0.0272314	0.0385237	0.165423	0.357695	0.155442	0.00997523	2.74674	up
ENSOARG00000011841	3.8724	1.38281	1.53078	13.7464	14.0084	18.1776	4.1776e-20	2.67495	up		ENSOARG00000011072	10.579	12.0817	1.73657	16.0701	18.7884	27.8033	0.0173792	1.20642	up		ENSOARG00000013440	4.99199	4.80109	5.79807	9.10622	14.2459	16.4596	5.10946e-05	1.30642	up		ENSOARG00000015170	8.66339	19.0145	2.1153	3.50983	2.10142	0.00231273	-2.45556	down
ENSOARG00000011878	0.576769	0.563728	0.810288	0.207647	0.506803	0.31797	0.0251872	-1.04208	down		ENSOARG00000011081	1.11057	1.05819	0.911018	2.34668	2.16555	3.21748	0.000496469	1.18455	up		ENSOARG00000013491	2.77896	2.63427	1.63374	0.634115	1.59047	0.947255	0.00181764	-1.20757	down		ENSOARG00000015172	1.03375	0.576777	2.13566	2.30772	1.39636	0.00470925	1.2497	up
ENSOARG00000011880	145.749	260.794	238.443	115.388	95.314	101.57	0.00225347	-1.16345	down		ENSOARG00000011224	0.856452	1.36468	1.25732	0.219978	0.352926	0.269198	1.5991e-07	-2.17958	down		ENSOARG00000013521	1.41555	1.48001	1.42043	3.25381	4.29104	4.45217	3.29191e-10	1.43105	up		ENSOARG00000015229	0.106166	0.0804599	1.1747	0.398439	0.519444	0.0259196	2.89965	up
ENSOARG00000011909	0.0122552	0	0	0.188903	0.0915328	0.281919	0.000207767	5.4897	up		ENSOARG00000011243	0.206566	0.0815271	0.262724	0.927867	0.398081	0.835553	0.0498245	1.83431	up		ENSOARG00000013538	2.05305	2.04453	1.72278	3.68152	4.09215	4.53846	0.000854145	1.03941	up		ENSOARG00000015234	0.957673	0.696755	2.45586	2.27199	1.25926	0.0157361	1.25056	up
ENSOARG00000012020	0.808123	0.639403	1.51927	1.25612	3.44902	4.05737	0.026798	1.4433	up		ENSOARG00000011267	0.0615897	0.0494843	0.053155	0.200079	0.185668	0.0626689	0.0477169	1.30455	up		ENSOARG00000013564	0.116924	0.105079	0.146821	0.84808	0.454414	0.669504	2.05311e-06	2.3905	up		ENSOARG00000015242	3.49102	0.730674	4.95795	4.60606	4.68216	0.0117562	1.1472	up
ENSOARG00000012023	0.734094	0.299364	0.39288	2.02294	1.14227	1.70466	0.00248495	1.69248	up		ENSOARG00000011311	0.540198	0.475609	0.845609	2.36428	1.72972	1.84161	0.00175013	1.54359	up		ENSOARG00000013606	0.566443	0.306475	0.220058	0.7318	1.24586	0.625132	0.0164603	1.20062	up		ENSOARG00000015274	0.609065	0.430817	0.792836	3.40149	2.40883	0.0457268	2.03842	up
ENSOARG00000012025	2.58486	2.97296	5.45945	2.56987	1.05844	1.12047	0.0281375	-1.31069	down		ENSOARG00000011321	0.46847	0.722771	1.10138	2.05648	2.08466	1.7826	0.00909897	1.24909	up		ENSOARG00000013615	0.036141	0.107973	0.0581459	0.395882	0.173458	0.443229	0.00276187	2.2963	up		ENSOARG00000015279	0.579628	0.803457	0.195931	0.192972	0.144085	0.00264167	-1.98132	down
ENSOARG00000012028	1.50396	0.985846	2.6978	0.917556	0.610713	0.728815	0.0416306	-1.29775	down		ENSOARG00000011350	42.4278	18.5473	30.0172	7.79745	12.9325	8.82729	0.00372847	-1.79416	down		ENSOARG00000013619	0.226284	0.349285	0.606767	0.0738329	0.195489	0.123889	0.0163551	-1.64114	down		ENSOARG00000015282	1.66894	1.2653	3.37629	5.53896	5.23075	3.21835e-06	1.65392	up
ENSOARG00000012161	1.61699	1.10327	1.33265	3.14553	2.9781	3.90759	0.00409635	1.20813	up		ENSOARG00000011352	0.13253	0.106705	0.0876509	0.553634	0.251316	0.346819	0.00912617	1.67943	up		ENSOARG00000013672	12.1582	17.4778	19.7914	35.849	43.7953	30.7115	5.22469e-07	1.11745	up		ENSOARG00000015319	28.0439	44.7142	7.25886	6.89577	8.04336	1.06285e-06	-2.318	down
ENSOARG00000012166	0.147678	0.051361	0.0885899	0.731309	0.265143	0.387146	0.00998953	2.19634	up		ENSOARG00000011372	0.360946	0.830323	0.341026	0.683271	1.32361	1.74114	0.0372159	1.16097	up		ENSOARG00000013712	0.531973	3.16597	2.96158	0.57858	0.534955	0.288478	0.020768	-2.28172	down		ENSOARG00000015388	18.1262	17.6741	32.6408	42.6642	43.2761	7.11747e-05	1.11644	up
ENSOARG00000012184	481.869	427.374	316.688	275.48	194.778	150.485	0.000219079	-1.08049	down		ENSOARG00000011375	2.36955	1.0267	3.34132	4.54092	7.43537	5.47182	0.000877651	1.21754	up		ENSOARG00000013745	75.2265	87.7633	35.5314	122.517	165.059	178.814	5.10465e-05	1.18662	up		ENSOARG00000015398	0.0038673	0	0.140957	0.0362846	0.0496694	0.0208903	5.28936	up
ENSOARG00000012241	0.206247	0.0331555	0.277005	0.00831141	0.047069	0.0312397	0.0264095	-2.68795	down		ENSOARG00000011385	0.993725	0.784402	1.07129	2.78448	2.07919	2.04724	0.00401708	1.14003	up		ENSOARG00000013765	2.39369	2.68359	2.57548	7.0734	3.88007	5.02452	0.00841571	1.03367	up		ENSOARG00000015431	8.83992	23.2162	3.60171	3.77292	3.67804	0.0182919	-2.14235	down
ENSOARG00000012297	0.609045	0.730249	0.646185	0.387475	0.430386	0.217884	0.0121325	-1.05384	down		ENSOARG00000011417	0.017819	0.063295	0.0226633	0.125063	0.180283	0.0611091	0.0492972	1.70453	up		ENSOARG00000013776	0.0524517	0.134316	0.176812	0.67758	0.640142	0.511983	0.00011107	2.29617	up		ENSOARG00000015436	0.0984117	0.026104	0.717388	1.08492	0.800497	0.000369149	3.76982	up
ENSOARG00000012336	1.27526	2.48744	2.87028	0.889922	1.32774	0.824849	0.011567	-1.25324	down		ENSOARG00000011429	0.00625601	0.00740732	0.00795678	0.00702528	0.101272	0.151832	0.0368775	3.43603	up		ENSOARG00000013805	0	0.0275212	0	0.334923	0.132638	0.290505	0.00313513	4.75856	up		ENSOARG00000015486	1.01825	0.871563	1.64516	2.6413	2.44705	0.00286174	1.21819	up
ENSOARG00000012344	14.9292	6.61611	9.6725	4.92141	4.57874	4.31423	0.00369033	-1.26627	down		ENSOARG00000011488	0.403379	0	0.437036	0	0.0690993	0	0.0263793	-3.82494	down		ENSOARG00000013839	0.837324	1.92828	1.74006	0.7318	0.653043	0.091686	0.0309782	-1.64242	down		ENSOARG00000015536	0.161789	0.0832292	0.754988	0.860186	0.356816	0.0012513	2.39896	up
ENSOARG00000012354	222.514	195.418	235.583	118.077	104.019	114.615	0.000106806	-1.06073	down		ENSOARG00000011548	0.648122	0.715547	0.724067	0.472099	0.0101272	0.0184839	0.000390705	-2.14815	down		ENSOARG00000013845	167.808	198.085	117.909	449.216	562.69	370.408	2.22353e-06	1.47094	up		ENSOARG00000015569	4.50775	3.42249	1.95813	1.99054	1.71497	0.000181478	-1.09294	down
ENSOARG00000012426	52.3695	130.286	116.928	42.3939	37.8793	31.7508	0.00743172	-1.5429	down		ENSOARG00000011750	0.448689	0.417421	0.122287	0.10797	0.0370579	0.0676372	0.0428011	-2.35583	down		ENSOARG00000013847	4.03035	5.10235	6.04691	1.89515	1.61669	2.18977	1.68929e-08	-1.4486	down		ENSOARG00000015584	0.0344894	0	0.377124	0.129438	0.708738	0.0248394	4.53843	up
ENSOARG00000012457	7.5572	7.3288	4.00372	11.1224	14.2644	18.4298	0.00549229	1.10396	up		ENSOARG00000011756	7.88107	10.5862	19.9114	4.64009	5.50368	4.04063	0.0104908	-1.56028	down		ENSOARG00000013870	0.291675	0.28009	0.145248	0.514688	1.06991	0.702636	0.00557453	1.6204	up		ENSOARG00000015647	0.6685	1.03353	0.0870204	0.0896021	0.490619	0.012815	-1.95943	down
ENSOARG00000012500	5.53311	4.8212	4.18237	6.42967	10.9418	14.3693	0.0149861	1.01481	up		ENSOARG00000011768	0.851623	0.610094	0.932963	2.50337	1.68395	1.61227	0.00185361	1.13851	up		ENSOARG00000013889	0.131615	0.131069	0.211751	0.490788	0.44218	1.32588	0.0414855	2.2128	up		ENSOARG00000015843	1.27658	0.363052	1.60693	2.2473	2.15228	0.0119355	1.25893	up
ENSOARG00000012537	0.192328	0.391305	0.703064	2.26702	2.2445	1.18802	0.0107159	2.02634	up		ENSOARG00000011817	1.51835	1.16722	2.18334	0.668027	0.379953	0.38261	2.40519e-05	-1.89507	down		ENSOARG00000014103	0.955138	1.64294	3.41796	0.283315	0.383404	0.707385	0.0225991	-2.17149	down		ENSOARG00000015928	0.527263	0.370435	1.305	0.842328	1.01273	0.0152063	1.21608	up
ENSOARG00000012640	0.53474	0.399446	0.702582	2.02374	1.51943	1.30737	0.0226089	1.46811	up		ENSOARG00000011839	0.117575	0.0801527	0.126882	0.652161	0.354293	0.379717	0.000524521	1.95932	up		ENSOARG00000014153	0.924121	1.73367	2.27773	0.443804	0.528653	0.13492	0.000375529	-2.19565	down		ENSOARG00000015970	0.448512	0.564825	0.252088	0.302828	0.0646029	0.0107969	-1.31933	down
ENSOARG00000012670	0.332985	0.404337	0.59355	0.793622	2.04292	2.14805	0.00300598	1.77944	up		ENSOARG00000011840	1.83333	1.24774	1.8911	3.11246	4.74044	6.42817	0.00149505	1.3686	up		ENSOARG00000014237	0	0.233157	0.182633	0.674635	1.30758	1.50092	9.20464e-07	3.02054	up		ENSOARG00000015996	9.05888	8.92929	22.9682	30.5706	18.0803	0.000161422	1.38139	up
ENSOARG00000012688	0.541269	0.541651	0.562811	0.837589	1.48232	1.27281	0.0276208	1.0085	up		ENSOARG00000011841	2.87442	7.01117	2.46539	13.7464	14.0084	18.1776	1.19888e-08	1.77527	up		ENSOARG00000014413	220.476	1212.11	292.028	1461.01	3695.89	2826.72	0.000887323	2.15734	up		ENSOARG00000016002	105.346	91.2784	227.635	259.499	178.667	0.0013764	1.15052	up
ENSOARG00000012705	2256.26	1689.25	2716.28	801.859	934.583	901.709	0.00466232	-1.44283	down		ENSOARG00000011889	14.9635	16.6905	24.3761	7.59027	10.0521	11.9184	0.000444895	-1.05756	down		ENSOARG00000014440	25.2686	46.894	37.3834	16.5959	12.3978	8.35545	9.39061e-05	-1.58398	down		ENSOARG00000016005	0.91614	0.353467	0.151781	0	0	0.0163483	-3.61923	down
ENSOARG00000012748	1.58256	0.370386	1.19181	0.821567	7.10359	10.9031	0.0492697	2.48137	up		ENSOARG00000011904	0.317334	0.375734	0.726488	1.14034	2.45841	1.40638	0.00242079	1.68013	up		ENSOARG00000014472	0.0307409	0.107147	0.0824299	0.444197	0.177049	0.403931	0.0135579	2.19411	up		ENSOARG00000016014	0.306642	0.32535	0	0	0	0.0368847	#NAME?	down
ENSOARG00000012804	0.34912	0.270593	0.259296	1.16069	0.543238	2.01842	0.0190732	1.98915	up		ENSOARG00000011909	0	0	0.088097	0.188903	0.0915328	0.281919	0.00997684	2.58726	up		ENSOARG00000014486	3.89484	2.86249	2.5435	6.123	7.93256	5.35068	0.000449989	1.01642	up		ENSOARG00000016106	0.0514709	0.209343	0.00781678	0.0160974	0	0.0221599	-4.06836	down
ENSOARG00000012846	0.215874	0.164383	0.0526091	1.02246	0.957327	0.817983	1.11978e-09	2.59448	up		ENSOARG00000011944	0.372261	0.902527	0.811653	1.57261	2.02921	1.23455	0.0478965	1.09474	up		ENSOARG00000014523	0.0401172	0.412824	0.301201	0.0373988	0.0577626	0.0585704	0.0476784	-2.3381	down		ENSOARG00000016116	0.953699	0.312124	1.5478	1.57592	1.50723	0.00127585	1.26262	up
ENSOARG00000012858	0.0344141	0.105805	0.0402567	0.305796	0.205628	0.316666	0.00904179	2.07192	up		ENSOARG00000011955	4.21358	4.01842	3.12116	6.71352	10.3117	8.83733	1.8303e-05	1.03527	up		ENSOARG00000014554	0.207421	0.0722962	2.04677	2.04968	2.39919	1.73523	0.0448196	1.37441	up		ENSOARG00000016168	4.64238	6.64998	2.50931	2.9932	2.1453	0.000123798	-1.17145	down
ENSOARG00000012927	1.18632	1.35258	1.21678	2.75928	3.3227	5.08891	0.000370245	1.45921	up		ENSOARG00000011986	22.1833	16.5342	16.2383	43.1911	50.6544	64.8351	5.59577e-07	1.37561	up		ENSOARG00000014581	4.33344	5.43848	5.39542	9.91052	13.8777	9.47903	8.08499e-06	1.08866	up		ENSOARG00000016181	1.68015	1.94583	3.99267	3.56116	3.65983	0.000351332	1.02435	up
ENSOARG00000012993	0.0358437	0.0833444	0.0598985	0.176428	0.525864	0.152695	0.0433854	2.10803	up		ENSOARG00000012023	0.267308	0.247697	0.251289	2.02294	1.14227	1.70466	4.01151e-06	2.53459	up		ENSOARG00000014644	0	0.0663021	0.0571283	0	0	0	0.0379042	#NAME?	down		ENSOARG00000016259	12.7209	5.89609	16.9967	23.9209	24.8797	0.000470185	1.20774	up
ENSOARG00000013018	0	0	0	0.844741	0.735988	4.09098	0.00587215	Inf	up		ENSOARG00000012044	0.0613128	0.0435578	0.0779814	0.481965	0.170148	0.232912	0.0206982	2.15102	up		ENSOARG00000014652	0.0217096	0.0792715	0.0388086	0.290086	0.180605	0.22187	0.00481141	2.27897	up		ENSOARG00000016325	0.465398	0.136742	0.841624	0.537423	0.901193	0.0215302	1.3192	up
ENSOARG00000013027	7.14514	2.44703	3.57514	15.3247	9.72916	14.9967	0.000165459	1.52718	up		ENSOARG00000012108	2.33734	2.00695	4.28896	1.74315	0.701443	1.8639	0.0412571	-1.12323	down		ENSOARG00000014659	0.0216053	0.0322734	0.0811064	0.986923	1.15101	5.99008	0.0101741	5.8723	up		ENSOARG00000016327	1.8053	1.22656	2.42422	4.1008	4.56945	0.00454096	1.25585	up
ENSOARG00000013031	0.118261	0.18471	0.178163	1.05279	0.562086	0.879348	0.000664622	2.26653	up		ENSOARG00000012129	0.200324	0.128761	0.33486	1.40116	0.655186	0.585835	0.0166272	1.86938	up		ENSOARG00000014674	74.428	122.288	89.2403	513.558	429.284	318.753	1.79523e-08	2.10678	up		ENSOARG00000016350	0.498973	0.364709	0.777988	1.186	1.39563	0.0198126	1.34567	up
ENSOARG00000013077	9.10741	3.41448	6.15732	1.84899	2.25074	2.054	0.00224261	-1.69424	down		ENSOARG00000012166	0	0.0868821	0.128324	0.731309	0.265143	0.387146	0.00428848	2.61611	up		ENSOARG00000014789	0.966128	0.874653	0.883724	0.393796	0.357304	0.311416	0.000152478	-1.39576	down		ENSOARG00000016470	7.04863	5.81744	1.23825	0.70956	4.53781	0.00815245	-1.59302	down
ENSOARG00000013089	0.182022	0.0582937	0.0813255	0.195987	0.258448	0.342476	0.0495093	1.2223	up		ENSOARG00000012169	49.6805	44.543	47.7715	15.6846	10.8833	11.3482	7.10401e-19	-2.04122	down		ENSOARG00000014811	0.341772	0.24392	0.549865	0.46199	1.0006	1.3722	0.0333923	1.27102	up		ENSOARG00000016539	0.337531	0.322312	4.15207	2.02679	2.5047	0.000191171	3.12429	up
ENSOARG00000013096	2.07099	0.67637	1.26689	0.771463	0.615404	0.398305	0.0379318	-1.25111	down		ENSOARG00000012187	0.28175	1.85864	0.20477	19.7747	4.1421	10.4057	0.00380362	3.79855	up		ENSOARG00000014816	0.233451	0.243049	0.170723	1.01891	0.682453	0.567025	0.00304537	1.77786	up		ENSOARG00000016631	0.0474811	0.0403024	0.216326	0.409849	0.642344	0.00201403	3.23709	up
ENSOARG00000013107	15.7533	15.9748	31.4784	9.4362	11.6154	10.1257	0.0272646	-1.13366	down		ENSOARG00000012227	0.373991	1.09349	0.514495	1.96276	1.465	1.35305	0.00559177	1.16335	up		ENSOARG00000014819	0.825066	0.544631	0.71807	4.51386	1.31242	2.58951	0.0212522	1.99156	up		ENSOARG00000016670	43.4896	30.1107	138.682	147.246	125.437	7.79374e-10	1.87438	up
ENSOARG00000013187	1.27199	0.419758	0.848014	0.261819	0.320774	0.308306	0.00866717	-1.60175	down		ENSOARG00000012297	1.69534	1.10983	0.393929	0.387475	0.430386	0.217884	0.0431027	-1.79824	down		ENSOARG00000014848	0.148226	0.260076	0.333108	0.565888	0.772385	1.27371	0.00183334	1.77436	up		ENSOARG00000016684	0.288356	0.582049	0.173032	0.184764	0.0541972	0.0139072	-1.68515	down
ENSOARG00000013198	1.83821	0.28173	1.00225	0.0847489	0.203614	0.10618	0.0130106	-3.07647	down		ENSOARG00000012307	1.50438	2.18345	1.7282	5.37691	4.0401	2.90176	0.00673725	1.06176	up		ENSOARG00000014980	0	0	0.00463465	0.120848	0.340117	0.227112	4.96541e-09	7.16535	up		ENSOARG00000016744	0.218199	0.127731	0.342802	0.670647	0.470292	0.0318279	1.48158	up
ENSOARG00000013268	0	0	0	0.376662	0.155135	0.637083	0.0117154	Inf	up		ENSOARG00000012371	0.591624	0.936923	0.846523	1.7772	1.94964	2.08356	0.00236193	1.16352	up		ENSOARG00000015023	13.3605	24.5119	4.4033	2.09932	3.19894	1.17936	0.0152132	-2.75466	down		ENSOARG00000016747	1.11958	1.61097	5.96265	3.26164	7.19182	0.0021033	1.9897	up
ENSOARG00000013310	0.106951	0.0152701	0.0274361	0.214363	0.178681	0.167858	0.0246711	1.84177	up		ENSOARG00000012405	13.3124	31.2537	21.06	8.6355	6.24221	10.7662	0.00215196	-1.46767	down		ENSOARG00000015088	11.9376	8.50616	7.59767	4.33821	5.29499	4.75231	0.000385793	-1.00666	down		ENSOARG00000016771	0.46457	0.716966	2.12943	1.50576	1.19333	0.0103126	1.43207	up
ENSOARG00000013318	1.28056	0.765588	0.649945	2.18786	2.45038	2.78622	0.00131521	1.36436	up		ENSOARG00000012426	124.32	94.295	145.798	42.3939	37.8793	31.7508	4.43214e-09	-1.84226	down		ENSOARG00000015109	0.735524	1.09395	0.906728	0.28496	0.463044	0.560635	0.00360684	-1.11049	down		ENSOARG00000016991	0.646593	0.314436	1.5957	1.26388	1.47635	0.0356167	1.56982	up
ENSOARG00000013326	11.5356	11.8996	8.08511	3.10862	2.9662	2.72339	1.07977e-11	-1.9488	down		ENSOARG00000012435	0	0.103098	0.0553726	0.277044	0.251703	0.336895	0.017191	2.37054	up		ENSOARG00000015112	0.689105	0.811016	0.911897	1.76871	2.72319	2.52435	2.25288e-05	1.49474	up		ENSOARG00000017086	0.202434	0.241633	0	0	0	0.000948384	#NAME?	down
ENSOARG00000013346	2.61263	2.3265	1.30573	3.39102	17.4581	34.6663	0.0332233	3.03587	up		ENSOARG00000012457	6.89778	2.09415	5.45502	11.1224	14.2644	18.4298	0.000322265	1.43057	up		ENSOARG00000015113	0.0186585	0	0.0100063	0.130457	0.0447757	0.0572065	0.0259584	2.99772	up		ENSOARG00000017094	0.547194	0.995278	1.95882	2.97039	3.41352	0.00747127	1.82266	up
ENSOARG00000013395	1.69045	4.34441	7.37203	1.77476	1.07983	1.06125	0.0380538	-1.89002	down		ENSOARG00000012493	0.11661	0.108484	0.0635622	0.579917	0.19262	0.377933	0.0168533	1.86221	up		ENSOARG00000015145	0.0242424	0.120709	0	0.316396	0.349053	0.38225	0.0103216	2.8117	up		ENSOARG00000017101	0.0128473	0.0204467	0.362904	0.0542425	0.264005	0.0215077	3.77188	up
ENSOARG00000013421	0.958759	1.10299	0.699733	1.62485	2.93371	3.80206	0.00282446	1.4795	up		ENSOARG00000012531	14	17.3278	29.8209	12.1587	8.69078	8.60067	0.0124625	-1.17269	down		ENSOARG00000015160	14.8758	18.0336	8.51485	5.16343	6.58271	4.58258	0.00156186	-1.38742	down		ENSOARG00000017259	2.07239	1.23553	2.98543	3.61103	3.56577	0.0302275	1.00836	up
ENSOARG00000013440	2.16399	2.4878	1.28011	9.10622	14.2459	16.4596	4.43757e-10	2.62943	up		ENSOARG00000012537	1.31997	0.0459674	0.34564	2.26702	2.2445	1.18802	0.0391193	1.52388	up		ENSOARG00000015237	38.9394	41.1376	37.5233	113.813	87.1831	60.5107	0.00432742	1.11981	up		ENSOARG00000017264	1.93967	2.77309	0.471818	0.894519	0.752991	1.58975e-05	-1.76977	down
ENSOARG00000013491	4.42328	2.03231	3.06492	0.634115	1.59047	0.947255	0.000391245	-1.69382	down		ENSOARG00000012603	0.358112	0.323061	0.412092	3.21718	1.93237	0.575822	0.0386157	2.26132	up		ENSOARG00000015242	1.46621	0.862798	1.56547	4.95795	4.60606	4.68216	1.07053e-11	1.83343	up		ENSOARG00000017307	1.08479	0.880157	0.290726	0.371196	0.218548	0.00530682	-1.76955	down
ENSOARG00000013524	17.5827	33.6233	38.8838	13.3036	15.1329	14.7452	0.0111447	-1.18395	down		ENSOARG00000012640	0.48808	0.689038	0.74015	2.02374	1.51943	1.30737	0.0341594	1.21755	up		ENSOARG00000015279	0.731034	0.91	0.960509	0.195931	0.192972	0.144085	2.78817e-05	-2.32489	down		ENSOARG00000017333	0.0899963	0.171877	0	0	0	0.00225497	#NAME?	down
ENSOARG00000013564	0.513116	0.188246	0.122904	0.84808	0.454414	0.669504	0.0311545	1.18739	up		ENSOARG00000012652	0.173228	0.37402	0.311043	0.858216	0.636248	0.956968	0.0181392	1.4013	up		ENSOARG00000015282	1.43346	1.45479	1.4461	3.37629	5.53896	5.23075	6.13986e-09	1.65917	up		ENSOARG00000017358	2.55863	6.5124	1.618	1.01665	1.74184	0.0421157	-1.65003	down
ENSOARG00000013603	46.2244	68.6086	95.3998	25.4437	31.7129	27.4291	0.00195865	-1.43391	down		ENSOARG00000012653	0.606519	1.2877	1.49848	3.35852	2.82135	3.30301	2.53337e-05	1.37089	up		ENSOARG00000015313	2.24647	3.67886	5.01025	7.41298	10.2	6.73455	0.000251061	1.11192	up		ENSOARG00000017378	0	0	0.207917	0.167545	0.0424722	0.002867	Inf	up
ENSOARG00000013745	109.912	40.443	61.5088	122.517	165.059	178.814	0.000995072	1.04682	up		ENSOARG00000012688	0.262221	0.344976	0.370565	0.837589	1.48232	1.27281	8.14161e-05	1.73876	up		ENSOARG00000015319	16.0884	16.1005	12.9866	7.25886	6.89577	8.04336	5.89876e-07	-1.06404	down		ENSOARG00000017398	3.81581	35.2632	67.4431	65.4813	89.686	3.38995e-05	1.90593	up
ENSOARG00000013765	1.8729	1.72856	0.927949	7.0734	3.88007	5.02452	0.000262157	1.72361	up		ENSOARG00000012689	0.309884	0.571952	0.139105	0.173994	0	0.134644	0.043868	-1.82787	down		ENSOARG00000015349	3.15104	2.31662	3.24363	6.8608	6.33355	7.02112	0.000242962	1.17672	up		ENSOARG00000017418	1.29172	0.987372	2.44898	3.91602	3.69264	1.82919e-05	1.52674	up
ENSOARG00000013776	0.0693366	0.362254	0.02253	0.67758	0.640142	0.511983	0.00394343	1.86497	up		ENSOARG00000012690	0.157947	0.133582	0.258284	0.785493	0.573985	0.714289	0.0308703	1.78562	up		ENSOARG00000015388	13.6247	20.4195	15.9466	32.6408	42.6642	43.2761	2.46181e-08	1.20279	up		ENSOARG00000017458	24.8607	12.5127	57.1113	51.9487	55.4517	4.87722e-08	1.53195	up
ENSOARG00000013806	7.73192	4.64875	3.5382	3.21166	2.43526	1.78487	0.00985708	-1.18902	down		ENSOARG00000012705	1936.65	2683.12	2692.88	801.859	934.583	901.709	0.0055529	-1.60207	down		ENSOARG00000015398	0.00378006	0.00752873	0.0121632	0.140957	0.0362846	0.0496694	0.0239136	3.26137	up		ENSOARG00000017475	9.45979	6.00435	2.72877	3.16685	2.52098	0.000152191	-1.48761	down
ENSOARG00000013809	3.1515	4.98459	2.20508	1.35408	1.6608	2.16117	0.0364731	-1.11981	down		ENSOARG00000012720	13.6711	16.8771	13.3291	42.1822	32.1822	30.8332	8.72338e-06	1.13118	up		ENSOARG00000015431	12.4369	9.54772	9.28555	3.60171	3.77292	3.67804	2.90709e-11	-1.54105	down		ENSOARG00000017489	0.840876	0.770518	2.68175	2.48339	2.96992	3.43566e-05	1.73007	up
ENSOARG00000013845	202.242	106.356	111.646	449.216	562.69	370.408	5.66421e-07	1.62002	up		ENSOARG00000012728	0.0947788	0.224443	0.308061	0.626774	0.596663	0.622293	0.0267146	1.44683	up		ENSOARG00000015436	0.312622	0.383169	0.0515863	0.717388	1.08492	0.800497	0.0195731	1.75137	up		ENSOARG00000017752	0.153251	0.357723	0.00698219	0.150976	0.0065609	0.0336663	-2.28546	down
ENSOARG00000013850	0.15722	0	0.126605	0	0.0127637	0.00582397	0.0250015	-4.04243	down		ENSOARG00000012738	0.0989278	0.101516	0.0587172	0.466589	0.442302	0.466273	0.000938817	2.26249	up		ENSOARG00000015584	0	0.100714	0	0.377124	0.129438	0.708738	0.0137338	3.56319	up		ENSOARG00000017758	1.03351	1.65703	4.54128	4.75502	2.74652	0.00055302	1.55583	up
ENSOARG00000013863	3.03263	3.01541	2.24027	6.49298	6.71327	5.41993	0.0002256	1.05959	up		ENSOARG00000012804	0.201349	0.182776	0.349987	1.16069	0.543238	2.01842	0.0115132	2.21711	up		ENSOARG00000015626	0.201757	0.0174712	0.127017	0.335282	0.261027	0.245895	0.0334983	1.24642	up		ENSOARG00000017795	5.45084	9.15605	3.37663	3.82768	3.44943	0.00695505	-1.0634	down
ENSOARG00000013870	0.278466	0.20338	0.302773	0.514688	1.06991	0.702636	0.0243878	1.4279	up		ENSOARG00000012846	0.238519	0.176509	0.487131	1.02246	0.957327	0.817983	1.02779e-05	1.50186	up		ENSOARG00000015641	1.69525	2.38678	0.87779	0.599453	0.785576	0.409661	0.0454642	-1.51148	down		ENSOARG00000017894	0.254433	0.358106	0.487341	0.613852	0.800276	0.0468309	1.02406	up
ENSOARG00000013875	0.826455	0.334801	0.779857	0.245789	0.438262	0.253491	0.035053	-1.15382	down		ENSOARG00000012851	0.489333	0.502135	1.07876	1.8561	1.97404	1.42283	0.0072517	1.21551	up		ENSOARG00000015684	0.596931	1.00799	1.3733	2.70176	2.45806	2.19014	0.000158933	1.26811	up		ENSOARG00000018032	0.381376	0.179842	2.85733	1.21262	3.93668	0.00240512	3.23656	up
ENSOARG00000013885	0.461631	0.38532	0.401541	0.927284	0.987947	1.24649	0.0110338	1.23524	up		ENSOARG00000012858	0.0444589	0.0526408	0.0565456	0.305796	0.205628	0.316666	0.00222431	2.30327	up		ENSOARG00000015708	0	0	0	0.0349665	0.18002	0.164284	0.0323928	Inf	up		ENSOARG00000018074	0.0770325	0.224764	0.0263222	0.0271032	0.049468	0.0447823	-2.15883	down
ENSOARG00000013927	14.0853	8.45171	8.92934	21.6688	29.3484	21.3469	6.99435e-05	1.09922	up		ENSOARG00000012860	0.00625315	0.0222118	0.00795314	0.133419	0.260294	0.0593854	0.00438043	3.51493	up		ENSOARG00000015709	2.56241	2.10521	3.32095	9.31623	8.46529	6.11665	1.11989e-06	1.54486	up		ENSOARG00000018117	25.239	14.3944	11.9456	8.80718	5.5075	0.0187713	-1.19453	down
ENSOARG00000013929	0	0	0	0.0124385	0.0128076	0.0409081	0.0349955	Inf	up		ENSOARG00000012881	0.75371	1.75859	1.64468	3.14492	3.3493	2.8538	0.00116245	1.05384	up		ENSOARG00000015724	3.62056	5.18637	3.62137	1.80998	2.77208	0.877129	0.000564203	-1.23395	down		ENSOARG00000018134	15.9667	13.9843	1.77736	4.40529	6.21522	6.97514e-10	-1.89153	down
ENSOARG00000013954	0.136754	0.359387	0.208296	0.100747	0.079797	0.112874	0.0368295	-1.38784	down		ENSOARG00000012927	0.899563	1.69629	1.59965	2.75928	3.3227	5.08891	0.00137458	1.28984	up		ENSOARG00000015775	44.5938	50.6345	37.0859	26.9123	19.5149	8.90804	3.07604e-05	-1.28902	down		ENSOARG00000018173	0.749569	6.36241	10.1883	11.018	14.9219	0.000536037	1.7389	up
ENSOARG00000014009	1.87873	1.31523	1.71325	3.15049	3.82863	4.21685	0.0145976	1.08567	up		ENSOARG00000012928	139.728	193.412	296.48	140.813	85.1464	85.5134	0.0113524	-1.1292	down		ENSOARG00000015856	19.294	11.5066	15.964	24.9137	30.0692	43.7255	0.00330297	1.03459	up		ENSOARG00000018200	1.46682	2.09067	0.0573639	0.295329	0.285684	1.3531e-11	-3.10487	down
ENSOARG00000014015	0.125781	0.170606	0.183918	0.646265	1.33088	0.464384	0.00640514	2.21566	up		ENSOARG00000012984	0.887357	0.793832	0.902876	0.575739	0.273609	0.145654	0.0301034	-1.50261	down		ENSOARG00000015880	0	0.0793063	0.0854164	0.816646	0.305773	0.279044	0.047002	3.07352	up		ENSOARG00000018369	1.06739	0.774568	5.36701	3.96437	2.99276	0.000129386	2.14137	up
ENSOARG00000014018	25.6445	44.6673	40.7354	16.8129	13.1902	13.1644	0.000180066	-1.47874	down		ENSOARG00000012993	0.0454789	0.014686	0.0262922	0.176428	0.525864	0.152695	0.0105631	3.11244	up		ENSOARG00000016032	9.77599	9.68259	9.48054	19.9081	19.1242	24.8083	1.29025e-06	1.10255	up		ENSOARG00000018385	4.55083	3.40034	11.4182	8.96052	12.307	1.22984e-05	1.43593	up
ENSOARG00000014078	0.0416692	0	0.0203098	0.132237	0.213966	0.248516	0.0163286	3.1906	up		ENSOARG00000013018	0	0	0.147192	0.844741	0.735988	4.09098	0.0204935	5.17213	up		ENSOARG00000016033	0.391479	0.432384	0.939028	2.64093	2.23418	1.10985	0.00343057	1.73113	up		ENSOARG00000018851	29.9651	21.4812	80.8386	62.4197	70.3991	7.5397e-06	1.45143	up
ENSOARG00000014079	0.831784	0.976808	0.979316	0.568089	0.23196	0.55222	0.0435279	-1.14282	down		ENSOARG00000013031	0.0781257	0.318623	0.121446	1.05279	0.562086	0.879348	0.00033944	2.17191	up		ENSOARG00000016106	0.0503097	0.150303	0.0269805	0.00781678	0.0160974	0	0.0445448	-3.30607	down		ENSOARG00000018901	1.37089	1.31087	2.18218	3.39023	3.07215	0.00405338	1.07434	up
ENSOARG00000014101	0.0321206	0.0290451	0.0417486	0.019416	0.339865	0.456113	0.0431911	2.85925	up		ENSOARG00000013048	61.4666	78.6374	47.0046	142.044	176.207	172.797	1.10758e-07	1.25107	up		ENSOARG00000016144	12.6689	18.7382	27.6263	8.10777	4.08986	7.86673	0.00214151	-1.58409	down		ENSOARG00000018973	0.0932643	0.131939	0	0	0	0.0244319	#NAME?	down
ENSOARG00000014103	1.46412	2.79317	2.07994	0.283315	0.383404	0.707385	2.28062e-05	-2.33019	down		ENSOARG00000013056	0.132588	0.22427	0.168634	0.765731	0.744646	0.299804	0.0438964	1.6604	up		ENSOARG00000016168	4.75092	3.96952	8.75581	2.50931	2.9932	2.1453	0.0209688	-1.23268	down		ENSOARG00000019042	0.0629409	0.236769	0.00521384	0.0107371	0.00489925	0.00971813	-4.46377	down
ENSOARG00000014151	0.196733	0.2011	0.166763	0.581673	0.718716	0.269644	0.0424533	1.36166	up		ENSOARG00000013116	133.093	107.475	166.096	57.4087	78.0891	37.7577	1.09639e-05	-1.37713	down		ENSOARG00000016177	9.86702	6.88662	5.22485	3.31896	3.056	3.81665	0.00293217	-1.14831	down		ENSOARG00000019043	3.61119	1.69364	0.166912	0.024552	0.112029	7.15543e-06	-4.71126	down
ENSOARG00000014153	3.18153	3.84455	3.62998	0.443804	0.528653	0.13492	4.93189e-22	-3.38388	down		ENSOARG00000013188	24.4913	25.6018	25.1233	11.239	14.8666	15.2354	6.46844e-06	-1.00672	down		ENSOARG00000016215	0.0232344	0.00771266	0	0.0577601	0.118948	0.0814125	0.0139643	3.00316	up		ENSOARG00000019055	4.54702	3.19071	10.829	8.3191	6.44161	0.0102935	1.12386	up
ENSOARG00000014210	0.256478	0.399419	0.208348	1.00772	0.718354	0.740541	0.0399877	1.40075	up		ENSOARG00000013224	0	0.0176605	0	0.0502489	0.0689863	0.141651	0.0384917	3.80805	up		ENSOARG00000016228	0.0377659	0.112827	0.162027	0.56331	0.205425	0.474184	0.0104241	1.96977	up		ENSOARG00000019062	0.151624	0.779626	1.87049	1.89316	5.22296	0.0306197	2.66444	up
ENSOARG00000014240	16.1957	4.3535	9.68972	1.1433	3.2259	3.82291	0.0138612	-1.97994	down		ENSOARG00000013303	0.529007	0.539635	0.791863	2.87432	1.11985	2.20279	0.00735594	1.61696	up		ENSOARG00000016257	3.34657	1.52371	1.87341	0.573158	1.19374	1.16895	0.0244304	-1.25208	down		ENSOARG00000019090	1.3055	1.50941	2.0472	3.64208	4.04417	0.00835309	1.17428	up
ENSOARG00000014271	6.21736	7.19073	6.30762	23.0316	23.443	18.9124	3.07882e-09	1.61757	up		ENSOARG00000013318	0.845967	1.19389	1.02161	2.18786	2.45038	2.78622	0.00196694	1.14622	up		ENSOARG00000016334	0.0971481	0.3507	0.0911738	0.0113207	0.0233131	0.0106376	0.0221157	-3.6259	down		ENSOARG00000019121	5.39308	11.305	1.04373	1.53368	2.56426	0.00260453	-2.31091	down
ENSOARG00000014280	0.967038	1.87714	1.84765	5.55322	6.27171	12.6005	0.00136014	2.25791	up		ENSOARG00000013326	7.4461	9.22922	8.96745	3.10862	2.9662	2.72339	7.33083e-12	-1.67503	down		ENSOARG00000016359	0.106449	0.153122	0.0444012	0.308734	0.386014	0.129512	0.0401139	1.39497	up		ENSOARG00000019140	6.30224	5.16501	11.6856	12.0127	13.58	0.000175024	1.09313	up
ENSOARG00000014375	4.77356	3.39933	0.988731	32.2611	37.7575	43.7503	1.56667e-37	3.53538	up		ENSOARG00000013378	0.181499	0.125033	0.214053	0.259403	0.576172	0.480539	0.0153135	1.18116	up		ENSOARG00000016430	0.817459	0.635191	0.778492	3.80009	2.74461	6.98104	0.000608606	2.56342	up		ENSOARG00000019143	5.6549	4.17182	15.9314	15.5543	13.7786	7.22356e-08	1.59696	up
ENSOARG00000014396	0.331115	0.0187132	0.282428	0	0	0	0.00251349	#NAME?	down		ENSOARG00000013390	0.131394	0.297622	0.167116	0.943046	0.726617	0.584735	0.000614451	1.8056	up		ENSOARG00000016539	0.362908	0.514724	0.448223	4.15207	2.02679	2.5047	5.48734e-05	2.68584	up		ENSOARG00000019158	0.174736	0.048066	0.0235883	0.0182161	0.0110825	0.0425383	-2.67733	down
ENSOARG00000014398	8.9607	27.9339	25.0899	7.3048	7.34804	6.58611	0.0151409	-1.67405	down		ENSOARG00000013408	0.107176	0.0951748	0.119274	0.188054	0.364031	0.438235	0.0346513	1.47215	up		ENSOARG00000016573	0.168327	0.201154	0.168507	0.0418456	0.0323153	0.0294906	0.0143628	-2.40976	down		ENSOARG00000019162	547.802	357.335	1153.28	1022.59	796.893	0.00236323	1.11085	up
ENSOARG00000014413	19.93	95.0654	17.811	1461.01	3695.89	2826.72	7.20191e-13	5.75303	up		ENSOARG00000013421	0.834921	1.83318	0.670134	1.62485	2.93371	3.80206	0.0237721	1.19373	up		ENSOARG00000016604	7.30328	5.54178	5.31508	17.3703	13.8865	17.1361	5.66412e-10	1.37772	up		ENSOARG00000019163	0.604491	0.160343	18.177	20.8715	19.2541	4.86132e-34	5.64129	up
ENSOARG00000014417	8.94679	2.02908	4.72057	12.2207	11.225	12.0569	0.00175869	1.09908	up		ENSOARG00000013432	0.369865	0.0700692	0	2.77451	2.66865	0.327839	0.00899737	3.49581	up		ENSOARG00000016631	0.120666	0.157139	0.199113	0.216326	0.409849	0.642344	0.0362173	1.36425	up		ENSOARG00000019194	0.345527	0.391892	0.662265	1.4309	0.744726	0.0375649	1.32384	up
ENSOARG00000014472	0.0474096	0.0857405	0.0154051	0.444197	0.177049	0.403931	0.00671702	2.67775	up		ENSOARG00000013440	2.8897	3.55854	3.95071	9.10622	14.2459	16.4596	4.898e-07	1.79861	up		ENSOARG00000016724	7.96438	18.0892	14.8172	101.246	56.0892	35.7462	0.00725992	2.21548	up		ENSOARG00000019246	0.0266645	0.042437	3.1343	1.17583	1.44976	0.000126992	5.79331	up
ENSOARG00000014512	3.44553	1.92435	2.42026	1.51611	0.614973	0.863411	0.0323295	-1.45997	down		ENSOARG00000013521	1.22155	1.37404	2.08499	3.25381	4.29104	4.45217	2.77113e-07	1.22369	up		ENSOARG00000016771	0.632973	0.616643	0.324697	2.12943	1.50576	1.19333	0.00126207	1.58369	up		ENSOARG00000019248	23.9685	31.4359	9.6914	12.2242	3.21985	4.95839e-06	-1.75077	down
ENSOARG00000014554	1.6741	0.163916	0.415779	2.04968	2.39919	1.73523	0.00885586	1.3894	up		ENSOARG00000013538	1.27326	1.6619	2.18046	3.68152	4.09215	4.53846	0.000532635	1.1382	up		ENSOARG00000016991	0.36867	0.576934	0.564895	1.5957	1.26388	1.47635	0.0185186	1.48716	up		ENSOARG00000019253	1.04267	0.753962	1.38579	2.66066	2.23474	0.00504788	1.1877	up
ENSOARG00000014562	0.234514	0.29468	0.267202	0.563348	0.750668	0.539736	0.0115885	1.10011	up		ENSOARG00000013551	0.098263	0.0223744	0.0432613	0.152787	0.249089	0.111664	0.0499761	1.45385	up		ENSOARG00000017094	0.420239	0.684809	0.327809	1.95882	2.97039	3.41352	7.81791e-05	2.49526	up		ENSOARG00000019435	0.913448	1.18886	1.8589	1.96547	3.35269	0.0218271	1.16358	up
ENSOARG00000014636	5.12935	5.7374	3.49202	10.8965	21.1499	32.0901	0.00341186	2.04129	up		ENSOARG00000013595	0.0102644	0.0182301	0.0130549	0.0518696	0.0534084	0.102895	0.0481111	2.19963	up		ENSOARG00000017101	0	0	0	0.362904	0.0542425	0.264005	7.41956e-05	Inf	up		ENSOARG00000019441	37.8929	63.2035	26.3026	20.4897	18.7912	0.00430098	-1.22539	down
ENSOARG00000014648	0.628595	0.543331	0.369459	1.37459	4.89341	7.65542	0.00645736	3.05896	up		ENSOARG00000013636	14.8817	20.4444	29.1021	9.95071	10.131	12.3302	0.00181854	-1.11607	down		ENSOARG00000017168	1.33299	1.55162	1.33165	30.1388	20.8406	9.89918	4.53116e-05	3.82196	up		ENSOARG00000019482	0.178889	0.105447	0	0	0	0.0022682	#NAME?	down
ENSOARG00000014652	0.0669625	0.0470952	0.0362643	0.290086	0.180605	0.22187	0.0132921	2.11275	up		ENSOARG00000013765	1.36225	2.92995	1.98692	7.0734	3.88007	5.02452	0.00495937	1.2389	up		ENSOARG00000017214	1.01285	1.40227	1.12346	0.52508	0.41735	0.419821	7.50535e-05	-1.4117	down		ENSOARG00000019628	0.41419	0.0961319	0.908151	0.86223	0.78686	0.0156735	1.71748	up
ENSOARG00000014659	0	0.0401733	0	0.986923	1.15101	5.99008	0.00328182	7.49342	up		ENSOARG00000013768	0.160717	0.310813	0.252105	0.523389	1.0035	0.582257	0.00512373	1.41129	up		ENSOARG00000017264	1.89592	1.42403	2.79177	0.471818	0.894519	0.752991	0.000572546	-1.57666	down		ENSOARG00000019715	0.132554	0.00937609	0.265726	0.240445	0.393455	0.0235622	2.05558	up
ENSOARG00000014697	0.179925	0.0162698	0.157854	0.130512	0.571133	0.735824	0.0458122	1.92644	up		ENSOARG00000013776	0.242598	0.162035	0.174055	0.67758	0.640142	0.511983	0.00849886	1.50776	up		ENSOARG00000017378	0.00969695	0.0386268	0.0208014	0.207917	0.167545	0.0424722	0.0186751	2.56487	up		ENSOARG00000019738	0.424195	0.311303	1.3142	1.34324	0.998822	1.70138e-05	1.70626	up
ENSOARG00000014716	0.0730129	0.15005	0.0647034	0.114348	0.979107	1.31201	0.0225031	2.92116	up		ENSOARG00000013805	0.0688265	0	0.0291793	0.334923	0.132638	0.290505	0.0319152	2.76205	up		ENSOARG00000017398	7.03239	3.43072	2.01547	67.4431	65.4813	89.686	5.62055e-34	4.11488	up		ENSOARG00000019982	0.027224	0.0361063	0.161244	0.261813	0.18648	0.00751718	2.65192	up
ENSOARG00000014731	1.18631	0.968912	0.578214	2.29702	3.47986	5.79382	0.00230399	1.97485	up		ENSOARG00000013806	10.9358	12.6582	4.62627	3.21166	2.43526	1.78487	0.00128566	-2.0649	down		ENSOARG00000017418	1.00463	1.29114	0.982896	2.44898	3.91602	3.69264	8.05336e-08	1.57012	up		ENSOARG00000019994	0.0555693	0.0393065	0.675137	1.1644	1.12606	7.63233e-06	4.34993	up
ENSOARG00000014759	730.651	698.249	1080.03	217.991	577.656	191.234	0.00139734	-1.4743	down		ENSOARG00000013820	0.633749	1.57111	0.83123	1.57904	2.67927	2.40327	0.0484857	1.00857	up		ENSOARG00000017432	0.0713114	0.0591795	0.101982	0.531834	0.250989	0.426865	0.00297429	2.3533	up		ENSOARG00000020029	0.331223	0.178911	0.471927	1.02271	0.670334	0.0120229	1.46445	up
ENSOARG00000014805	0	0	0	0.125451	0.09688	0.176823	0.02205	Inf	up		ENSOARG00000013861	16.4839	19.2091	16.9611	6.21661	5.90316	6.15985	2.41201e-13	-1.66154	down		ENSOARG00000017449	0.119585	0.0476355	0.0577188	0.0390187	0.011479	0	0.0334189	-2.16594	down		ENSOARG00000020052	0.793661	3.57886	0.361595	0.0620539	0.0566296	0.0294928	-3.75779	down
ENSOARG00000014806	1.5966	1.57141	0.529382	3.28923	2.34238	3.17405	0.00417368	1.15133	up		ENSOARG00000013869	1.6544	2.13639	1.45977	0.673466	1.30918	0.671019	0.000853169	-1.132	down		ENSOARG00000017458	21.6623	28.1024	20.9817	57.1113	51.9487	55.4517	2.0574e-08	1.17995	up		ENSOARG00000020058	7.37115	7.14131	1.60998	1.91159	1.90051	1.7901e-12	-2.03018	down
ENSOARG00000014829	45.6371	19.9658	24.2118	13.7515	17.9109	8.64251	0.0162313	-1.2514	down		ENSOARG00000013870	0.285375	0.112631	0.0989884	0.514688	1.06991	0.702636	0.00130713	2.01098	up		ENSOARG00000017477	25.3955	68.5924	47.3427	112.136	107.277	73.4283	0.00577867	1.01463	up		ENSOARG00000020147	4.59076	5.95222	2.9395	2.68579	2.06402	0.000812358	-1.05961	down
ENSOARG00000014848	0.442683	0.288739	0.254675	0.565888	0.772385	1.27371	0.0126573	1.30408	up		ENSOARG00000013875	0.613917	0.436139	0.814767	0.245789	0.438262	0.253491	0.0217198	-1.14391	down		ENSOARG00000017489	0.719168	1.06032	0.69122	2.68175	2.48339	2.96992	1.40077e-06	1.68117	up		ENSOARG00000020163	0.743649	2.55548	0.0505686	0.0833102	0.0665244	0.00309493	-4.65471	down
ENSOARG00000014870	0.591793	0.470914	0.80764	2.29658	1.76802	1.12943	0.0295378	1.37286	up		ENSOARG00000013885	0.298186	0.305534	0.678277	0.927284	0.987947	1.24649	0.00565915	1.17464	up		ENSOARG00000017584	263.178	421.6	311.003	81.8491	311.75	26.0913	0.0262461	-1.31221	down		ENSOARG00000020193	0.569939	0.429151	1.39047	1.49498	1.40627	0.000626372	1.49444	up
ENSOARG00000014878	0	0	0	0.0930442	0.415154	0.17486	0.00369625	Inf	up		ENSOARG00000013889	0	0.0646847	0	0.490788	0.44218	1.32588	0.00188542	5.05387	up		ENSOARG00000017758	0.448974	1.73628	1.34034	4.54128	4.75502	2.74652	6.08802e-05	1.73491	up		ENSOARG00000020231	410.325	209.599	18.712	151.868	7.1567	0.00445426	-2.4483	down
ENSOARG00000014887	2.74559	3.79651	2.20779	3.40968	7.45057	9.40251	0.0425148	1.08634	up		ENSOARG00000013904	0	0	0	0.310461	0.399589	0.656388	0.00729426	Inf	up		ENSOARG00000017795	7.11675	5.59807	8.04312	3.37663	3.82768	3.44943	8.86905e-06	-1.00325	down		ENSOARG00000020380	1.77208	2.78788	12.4724	20.7543	8.89454	0.000603065	2.59174	up
ENSOARG00000014916	23.5522	35.5855	37.4866	13.5128	21.5538	15.6168	0.00122186	-1.0562	down		ENSOARG00000013916	23.9488	28.3561	40.7739	13.518	16.7028	20.19	0.00845542	-1.01705	down		ENSOARG00000017839	3.55327	3.36836	4.55364	6.89866	8.22624	9.51061	5.67988e-07	1.06056	up		ENSOARG00000020385	0.436925	0.649015	3.82204	1.96772	1.42161	0.0360878	2.13935	up
ENSOARG00000015000	0.0320396	0.0217289	0.0156163	0.123465	0.142085	0.0682445	0.0438313	2.16489	up		ENSOARG00000013919	0.0376903	0.0567975	0.0305053	0.115432	0.0792375	0.19524	0.0469128	1.51305	up		ENSOARG00000017897	0.604601	0.950175	0.8106	2.64203	1.96777	2.19298	4.56989e-05	1.4909	up		ENSOARG00000020390	0.430008	0.180375	0.0820102	0.0656781	0.0513746	0.0101425	-2.21982	down
ENSOARG00000015039	1.51876	0.448243	0.524345	0.162572	0.128008	0.0179721	0.00673133	-3.08839	down		ENSOARG00000013966	0.224344	0.18025	0.397431	0.0719803	0.0463224	0.101456	0.0140719	-1.99632	down		ENSOARG00000017965	12.0105	8.10997	8.27775	91.8389	11.347	71.5875	0.0244831	2.6049	up		ENSOARG00000020474	0.352377	0.304853	0.153135	0	0.0835518	0.00335858	-2.04698	down
ENSOARG00000015066	0.0421759	0.0312035	0.0411135	0.121677	0.146765	0.104535	0.0480124	1.59743	up		ENSOARG00000013973	0	0	0.00699435	0.0308776	0.025435	0.0406204	0.0380779	3.70001	up		ENSOARG00000017981	0.603043	0.689144	0.996722	1.52987	2.3534	1.57612	0.00190439	1.20864	up		ENSOARG00000020522	2.84023	3.12723	5.47604	9.00006	5.2964	0.00680994	1.1127	up
ENSOARG00000015099	0.0181078	0	0	0.0656743	0.321208	0.123423	0.00958078	4.75041	up		ENSOARG00000013999	0.12352	0.0487507	0.261835	0.635749	0.214236	0.488774	0.0395396	1.50346	up		ENSOARG00000018005	0.162267	1.13115	0.332264	10.8503	0.934556	10.4024	0.00697879	3.75477	up		ENSOARG00000020574	6.34011	9.17838	3.7496	2.93996	4.50468	0.00112071	-1.07399	down
ENSOARG00000015109	1.21292	0.572814	0.818561	0.28496	0.463044	0.560635	0.0151557	-1.09208	down		ENSOARG00000014009	1.01129	1.54503	1.49367	3.15049	3.82863	4.21685	0.00101831	1.33779	up		ENSOARG00000018007	0.328026	0.261332	0.255879	0.761718	0.641193	0.668737	0.00772616	1.25673	up		ENSOARG00000020631	4.90696	5.60527	11.0504	12.9956	13.1828	8.57689e-06	1.21496	up
ENSOARG00000015145	0.0249249	0.0450768	0.0242971	0.316396	0.349053	0.38225	0.00510961	3.35099	up		ENSOARG00000014015	0.118485	0.0200414	0.279865	0.646265	1.33088	0.464384	0.00514663	2.39244	up		ENSOARG00000018098	8.43061	8.85596	5.51519	19.3919	17.6556	15.4104	3.78267e-08	1.16402	up		ENSOARG00000020658	221.09	100.905	44.3971	71.0323	34.2113	0.0148439	-1.72225	down
ENSOARG00000015146	3.30009	2.35157	2.59122	5.64866	6.7613	7.54456	0.000101153	1.17178	up		ENSOARG00000014018	30.453	35.3299	31.4248	16.8129	13.1902	13.1644	5.07477e-09	-1.30285	down		ENSOARG00000018158	0.150448	0.181929	0.190182	0.355643	0.433244	0.404787	0.0364145	1.14978	up		ENSOARG00000020752	1249.55	702.052	2672.77	2558.5	1421.62	0.0236476	1.16325	up
ENSOARG00000015170	4.15994	4.06028	8.35005	2.1153	3.50983	2.10142	0.0291323	-1.22017	down		ENSOARG00000014115	3.86603	6.2325	7.60133	3.53168	2.90853	3.06984	0.00191484	-1.01448	down		ENSOARG00000018173	1.95376	0.729618	0.196458	10.1883	11.018	14.9219	5.41879e-14	3.60367	up		ENSOARG00000020765	124.469	230.584	46.3124	63.1415	73.1693	0.00412336	-1.57018	down
ENSOARG00000015171	0.502812	0.568335	0.158276	0.0427411	0.0586789	0.0758619	0.00123036	-2.90802	down		ENSOARG00000014123	0.0096748	0.0229106	0.0615251	0.260747	0.145428	0.316477	0.00317901	2.84265	up		ENSOARG00000018188	0.917785	1.8631	1.59017	5.92335	2.57517	2.90666	0.0451694	1.36155	up		ENSOARG00000020773	1.67446	0.640225	3.56016	3.87809	8.38275	0.0183768	2.16268	up
ENSOARG00000015177	2.5101	2.28018	1.20099	5.59588	23.4239	41.4969	0.00992423	3.44024	up		ENSOARG00000014144	404.947	463.64	532.227	252.775	290.802	191.757	0.000132564	-1.06529	down		ENSOARG00000018254	0.0282447	0.0522367	0.0281307	0.0733501	0.0948921	0.1891	0.0172262	1.6746	up		ENSOARG00000020776	26.1587	23.7709	5.7922	11.3726	8.7377	1.19889e-08	-1.56506	down
ENSOARG00000015180	1.77587	0.881959	1.13914	3.34554	3.24722	3.15936	0.000685692	1.2682	up		ENSOARG00000014153	5.33529	2.38098	10.7281	0.443804	0.528653	0.13492	0.000706024	-4.19868	down		ENSOARG00000018341	301.784	63.3089	110.434	984.869	1246.79	192.683	0.0270505	2.30391	up		ENSOARG00000020789	6.50941	16.7432	46.3011	54.5965	32.3265	1.66358e-05	1.91026	up
ENSOARG00000015229	0.0914511	0.0826948	0.237727	1.1747	0.398439	0.519444	0.0212689	2.25396	up		ENSOARG00000014176	0.0721847	0.142448	0.0765075	0.297223	0.403418	0.418934	0.029349	1.8149	up		ENSOARG00000018376	0.715057	1.28176	0.342179	1.43576	3.55862	2.61154	0.00425674	1.64635	up		ENSOARG00000020892	54.3285	97.9416	26.0647	20.9938	22.7009	0.00115514	-1.72817	down
ENSOARG00000015242	0.801709	2.34213	0.574446	4.95795	4.60606	4.68216	5.18592e-08	1.80614	up		ENSOARG00000014180	0.0904354	0.176365	0.0473618	0.197138	0.5536	0.493982	0.00469911	1.84335	up		ENSOARG00000018427	1.53905	0.984281	0.984393	2.00078	2.57517	2.72113	0.009881	1.01209	up		ENSOARG00000020973	0.316507	0.527713	0.123602	0.0424229	0.0387146	0.0415854	-2.62839	down
ENSOARG00000015327	0.931261	0.958692	1.14523	2.01353	2.35417	2.45355	0.0237168	1.0562	up		ENSOARG00000014237	0.00883474	0.146449	0.0224731	0.674635	1.30758	1.50092	1.70336e-09	4.19835	up		ENSOARG00000018595	1.21484	1.0297	0.860235	2.10377	2.75868	2.35567	1.24594e-05	1.1725	up		ENSOARG00000020983	0.185107	0.240045	1.48056	1.83324	0.933352	0.000353407	2.71036	up
ENSOARG00000015359	0.156378	0.130528	0.205206	0.0436275	0.0673828	0.0409952	0.0308768	-1.80925	down		ENSOARG00000014240	11.8603	5.9178	7.44987	1.1433	3.2259	3.82291	0.00396507	-1.79944	down		ENSOARG00000018650	0.168859	0.147138	0.158474	0.826437	0.688869	0.480735	0.0103238	2.03772	up		ENSOARG00000021024	1.16413	0.77197	2.01545	4.30522	3.06503	0.00243334	1.65712	up
ENSOARG00000015398	0.0116594	0.0175718	0	0.140957	0.0362846	0.0496694	0.0391298	2.86154	up		ENSOARG00000014271	7.22847	8.02609	6.16375	23.0316	23.443	18.9124	7.08645e-10	1.47037	up		ENSOARG00000018703	2.77936	2.89488	3.00062	4.55342	6.01809	8.28595	0.00107429	1.07652	up		ENSOARG00000021057	0	0.0123112	0.824691	0.152413	0.447076	0.00209844	6.27506	up
ENSOARG00000015403	0.103928	0.297594	0.337701	0.109938	0.0485143	0	0.0223417	-2.32991	down		ENSOARG00000014278	1.43242	1.84631	1.97173	0.875542	0.932966	1.01404	0.0129094	-1.02676	down		ENSOARG00000018757	31.1388	56.0325	55.8036	105.505	148.98	213.236	0.000248636	1.66639	up		ENSOARG00000021172	4.28394	3.81071	10.9911	10.7285	7.53983	5.43731e-05	1.24781	up
ENSOARG00000015407	1.19753	0.68116	0.828454	1.96147	2.72294	2.17225	0.0188931	1.23885	up		ENSOARG00000014299	0.736713	0.704884	0.870746	0.476326	0.610922	0.0863763	0.026376	-1.12149	down		ENSOARG00000018816	43.1203	62.2773	107.596	230.216	143.769	355.614	0.00425042	1.74455	up		Ovis_aries_newGene_10099	0.293821	0.0498795	0.862096	1.02551	0.528313	0.000337955	2.20145	up
ENSOARG00000015431	4.29971	10.8927	14.0525	3.60171	3.77292	3.67804	0.0238769	-1.52892	down		ENSOARG00000014336	19.2222	12.2353	7.95369	6.34075	5.99533	6.22724	0.0331374	-1.24923	down		ENSOARG00000018837	0.0343792	0.150641	0.0884982	0.352546	0.389406	0.397529	0.00233404	2.01937	up		Ovis_aries_newGene_10625	0.0542947	0.0144018	0.185527	0.191031	0.26731	0.032875	2.61899	up
ENSOARG00000015436	0.123625	0.0447151	0.168715	0.717388	1.08492	0.800497	0.00114747	2.84635	up		ENSOARG00000014349	0.331941	0.267974	0.249472	0	0.104677	0.0796061	0.0156691	-2.3836	down		ENSOARG00000018851	51.6098	32.9841	17.063	80.8386	62.4197	70.3991	0.00302583	1.03451	up		Ovis_aries_newGene_11219	0.190954	0.0578869	0.347997	0.511888	0.630642	0.0246622	1.96784	up
ENSOARG00000015464	98.5265	97.6774	149.931	43.6403	58.9303	52.6099	0.000102025	-1.27186	down		ENSOARG00000014351	8.90453	12.436	14.3059	7.99423	4.58175	6.56796	0.000157932	-1.01441	down		ENSOARG00000018982	0.136295	0.0678644	0.10233	0.711531	0.261657	0.561146	0.00270738	2.29876	up		Ovis_aries_newGene_11547	0.435761	0.592382	0.0124084	0.0127765	0.0116597	7.98879e-07	-5.40914	down
ENSOARG00000015476	149.804	194.59	268.249	103.723	113.603	108.722	0.00363951	-1.02578	down		ENSOARG00000014375	3.6398	13.8063	3.40586	32.2611	37.7575	43.7503	8.318e-14	2.33735	up		ENSOARG00000019062	0.307808	0.53359	0.415741	1.87049	1.89316	5.22296	0.00638048	2.79739	up		Ovis_aries_newGene_12106	0.0180764	0.0383586	0.181185	0.13568	0.402416	0.0232167	3.06837	up
ENSOARG00000015495	1.09164	0.614077	0.890908	0.575465	0.485881	0.292001	0.0295984	-1.03409	down		ENSOARG00000014391	14.7245	29.8084	31.9759	8.26034	10.4385	13.9633	0.0015056	-1.34861	down		ENSOARG00000019071	0.172935	0.0810436	0.158209	0.303468	0.483354	1.09607	0.0254467	2.14541	up		Ovis_aries_newGene_12413	0.460073	1.00198	0.198579	0.0908757	0.124398	0.00696986	-2.41263	down
ENSOARG00000015496	0.191578	0.100476	0.0634959	0.0382154	0.0321948	0.0522321	0.0427631	-1.62327	down		ENSOARG00000014398	17.2709	11.7169	15.8598	7.3048	7.34804	6.58611	3.04114e-05	-1.22779	down		ENSOARG00000019084	0.178504	0.222204	0.172313	0.565788	0.599708	1.52458	0.0132786	2.18958	up		Ovis_aries_newGene_13293	0.004829	0.00512363	0.0264014	0.185762	0.124042	0.0128476	4.44621	up
ENSOARG00000015536	0.221716	0.0801948	0.192116	0.754988	0.860186	0.356816	0.000926379	1.90285	up		ENSOARG00000014413	54.643	227.447	52.0929	1461.01	3695.89	2826.72	1.56424e-09	4.45812	up		ENSOARG00000019090	1.16583	1.77737	1.54145	2.0472	3.64208	4.04417	0.00336137	1.07036	up		Ovis_aries_newGene_15575	0.443824	0.109877	0.0134805	0.0138805	0.0380014	0.0260697	-3.69288	down
ENSOARG00000015569	4.53011	1.74966	4.84062	1.95813	1.99054	1.71497	0.0377287	-1.06741	down		ENSOARG00000014417	2.26184	5.21087	2.44561	12.2207	11.225	12.0569	1.12139e-12	1.72189	up		ENSOARG00000019118	16.8464	30.7132	28.42	6.24062	10.3943	9.70024	5.00717e-05	-1.57506	down		Ovis_aries_newGene_15754	0.216718	0.476305	0.0705268	0.0145239	0.172306	0.0353941	-2.02515	down
ENSOARG00000015584	0	0.125367	0	0.377124	0.129438	0.708738	0.0238418	3.12083	up		ENSOARG00000014422	0.00992387	0.0117502	0.21457	0.256316	0.436042	0.261794	0.0171388	1.90368	up		ENSOARG00000019143	5.75403	6.63321	4.77057	15.9314	15.5543	13.7786	2.38582e-09	1.36066	up		Ovis_aries_newGene_15839	9.97395	14.391	2.92125	3.52853	4.24653	2.92769e-07	-1.79719	down
ENSOARG00000015628	8.77729	3.901	5.42687	22.274	16.7791	12.0995	0.00135548	1.41256	up		ENSOARG00000014440	30.8683	16.9067	21.9415	16.5959	12.3978	8.35545	0.0213238	-1.05288	down		ENSOARG00000019163	6.11534	0.17652	1.36253	18.177	20.8715	19.2541	8.527e-22	2.88294	up		Ovis_aries_newGene_16018	0.638279	0.26047	0.134217	0.0460662	0.0420394	0.0417447	-2.60193	down
ENSOARG00000015684	0.604843	0.23325	0.598278	2.70176	2.45806	2.19014	2.01778e-07	2.26403	up		ENSOARG00000014447	0.0150368	0.0569731	0.0420745	0.124955	0.142572	0.17771	0.00977106	1.85741	up		ENSOARG00000019171	0.13526	0.117861	0.163211	0.220666	3.34327	2.07351	0.0133355	3.6911	up		Ovis_aries_newGene_16265	0.156522	0.182679	0.0142625	0.0146856	0.0670095	0.0484534	-2.43039	down
ENSOARG00000015709	4.03965	1.74702	2.35417	9.31623	8.46529	6.11665	0.000108449	1.4651	up		ENSOARG00000014486	1.57491	3.72949	3.26257	6.123	7.93256	5.35068	0.000485287	1.06071	up		ENSOARG00000019186	3.78859	7.40878	9.05632	16.5632	18.1107	20.4607	1.15034e-10	1.4059	up		Ovis_aries_newGene_16483	1.00048	0.0379116	3.06054	2.84961	1.22377	0.0136876	2.17311	up
ENSOARG00000015775	38.8543	43.3323	45.2472	26.9123	19.5149	8.90804	3.02858e-06	-1.30835	down		ENSOARG00000014509	10.0968	6.00993	11.9019	2.975	2.15286	3.41861	8.45436e-05	-1.85453	down		ENSOARG00000019246	0.0781889	0.285503	0.181704	3.1343	1.17583	1.44976	0.00101554	3.38133	up		Ovis_aries_newGene_17111	0.119032	0.378882	0.0135578	0.0418802	0.0509591	0.0272716	-2.84636	down
ENSOARG00000015845	0	0.020286	0	0.122047	0.0837789	0.114683	0.0404006	3.82031	up		ENSOARG00000014554	0.817915	0.703392	0.328508	2.04968	2.39919	1.73523	0.000184093	1.58292	up		ENSOARG00000019272	2.79846	2.5571	1.8827	3.62805	6.26787	10.5086	0.0231085	1.44712	up		Ovis_aries_newGene_17462	0.0563115	0.159326	0	0	0	0.00578564	#NAME?	down
ENSOARG00000015862	0	0	0	0.0406555	0.0418617	0.101873	0.0178277	Inf	up		ENSOARG00000014555	5.83141	6.53868	12.7144	4.04376	3.75979	3.34607	0.014123	-1.29427	down		ENSOARG00000019334	0	0.0644286	0.027757	0.337754	0.0869436	0.30604	0.00459048	2.96735	up		Ovis_aries_newGene_18037	0.859597	0.401299	0.34464	0.0322604	0.0294405	0.0253628	-2.20046	down
ENSOARG00000015959	0	0	0	0.00754989	0.0349825	0.0532076	0.00314254	Inf	up		ENSOARG00000014562	0.14017	0.197994	0.253341	0.563348	0.750668	0.539736	0.000157227	1.51799	up		ENSOARG00000019361	6.59393	2.72857	5.84529	2.61042	2.91908	0.0527508	0.0194265	-1.48229	down		Ovis_aries_newGene_18605	6.72477	3.05788	0.680852	1.30195	1.4928	0.00643524	-2.11081	down
ENSOARG00000016054	0.0197281	0.115955	0.0144234	0.290676	0.110511	0.394998	0.0126165	2.27284	up		ENSOARG00000014637	0.296509	0.270059	0.101532	0.691551	1.58237	0.709993	0.00553965	1.98873	up		ENSOARG00000019417	2125.48	3060.02	2391.09	1151.53	1281.16	856.324	0.000655632	-1.24424	down		Ovis_aries_newGene_18620	0.409849	0.391369	0.0373458	0.0384538	0.14037	0.0499249	-2.49883	down
ENSOARG00000016116	1.10625	0.500163	0.343966	1.5478	1.57592	1.50723	0.00231474	1.16018	up		ENSOARG00000014652	0.0180224	0.0213391	0.11461	0.290086	0.180605	0.22187	0.0079244	2.06684	up		ENSOARG00000019435	1.0595	0.895063	0.753343	1.8589	1.96547	3.35269	0.00157827	1.36458	up		Ovis_aries_newGene_18628	0.597757	1.2458	0.0194529	0.02003	0.146233	8.21212e-05	-3.91959	down
ENSOARG00000016144	6.07587	30.2519	31.8742	8.10777	4.08986	7.86673	0.0387423	-1.88698	down		ENSOARG00000014659	0.0179358	0.0212366	0.0456237	0.986923	1.15101	5.99008	0.00654654	6.45715	up		ENSOARG00000019483	5.22377	5.80566	6.58599	3.25117	2.29613	2.84829	1.71159e-07	-1.10176	down		Ovis_aries_newGene_20674	0.093157	0.205918	0.940813	0.488005	0.4387	0.0174869	2.05017	up
ENSOARG00000016157	2.22334	2.41838	2.55997	1.21248	1.23341	1.01578	0.0129074	-1.16786	down		ENSOARG00000014704	2.85318	3.13045	1.29835	2.14401	0.365467	0.247887	0.0363016	-1.51401	down		ENSOARG00000019538	0.125742	0.225397	0.161842	0	0.0482799	0.0220298	0.0353305	-2.94184	down		Ovis_aries_newGene_22796	0.496634	0.150553	0.00923545	0.00950946	0.00867821	0.00226346	-5.16958	down
ENSOARG00000016168	4.74858	7.08358	5.24812	2.50931	2.9932	2.1453	5.86223e-05	-1.27969	down		ENSOARG00000014759	488.393	688.813	729.613	217.991	577.656	191.234	0.014719	-1.09586	down		ENSOARG00000019545	45.5602	80.259	54.9219	16.9633	22.2189	20.6418	2.50147e-05	-1.63845	down		Ovis_aries_newGene_22911	0.388485	0.394265	0.138518	0.06339	0.0578489	0.0197423	-2.18244	down
ENSOARG00000016175	13.9148	11.6381	13.2891	43.2755	28.6698	33.0894	1.29138e-05	1.33732	up		ENSOARG00000014789	0.784679	0.842755	0.423931	0.393796	0.357304	0.311416	0.00649218	-1.09294	down		ENSOARG00000019575	0.470018	0.408495	0.696616	3.72842	1.53398	6.75239	0.00597098	2.90115	up		Ovis_aries_newGene_24573	0.469632	0.70346	0.0125862	0.0129597	0.130095	8.86382e-05	-3.52299	down
ENSOARG00000016179	0.986041	0.287303	0.566042	0.0894054	0.143201	0.261367	0.0123953	-1.98542	down		ENSOARG00000014811	0.316826	0.291148	0.30673	0.46199	1.0006	1.3722	0.0140334	1.47915	up		ENSOARG00000019657	0	0	0	0.0741689	0.0152739	0.055755	0.0412892	Inf	up		Ovis_aries_newGene_24745	1.19358	0.65853	0	0.0223974	0.0204396	1.65717e-07	-6.07029	down
ENSOARG00000016215	0.0398143	0	0.00776228	0.0577601	0.118948	0.0814125	0.043039	2.37495	up		ENSOARG00000014814	55.8145	63.5419	83.485	29.1004	34.4918	36.7727	3.65409e-07	-1.14938	down		ENSOARG00000019729	0.714952	0.36958	0.684887	1.22108	1.29398	1.13306	0.00477089	1.0037	up		Ovis_aries_newGene_25084	0.0443824	0.282541	0.808831	0.832828	1.33005	0.0159488	2.57877	up
ENSOARG00000016257	16.8735	12.296	3.34011	0.573158	1.19374	1.16895	0.000896052	-3.5769	down		ENSOARG00000014819	0.645796	0.509763	0.592378	4.51386	1.31242	2.58951	0.0158559	2.1406	up		ENSOARG00000019776	41.4716	33.9793	32.0747	16.9387	18.7306	15.7141	2.55905e-07	-1.10668	down		Ovis_aries_newGene_25219	0.660599	0.892059	0.0456018	0.272337	0.317092	0.00355613	-1.91587	down
ENSOARG00000016259	14.0355	9.44268	6.6639	16.9967	23.9209	24.8797	0.000167642	1.02332	up		ENSOARG00000014829	32.809	25.3268	42.8209	13.7515	17.9109	8.64251	4.5474e-05	-1.46999	down		ENSOARG00000019994	0.0181052	0.0180301	0.310708	0.675137	1.1644	1.12606	2.26575e-05	3.05399	up		Ovis_aries_newGene_25372	0.0496038	0.0175434	0.391728	0.341296	0.155731	0.0124031	3.12197	up
ENSOARG00000016263	2.7864	0.656516	2.17105	0.195711	1.04423	0.501553	0.0283392	-1.79891	down		ENSOARG00000014848	0.146489	0.256703	0.29065	0.565888	0.772385	1.27371	0.00147663	1.78761	up		ENSOARG00000020029	0.306092	0.304822	0.195721	0.471927	1.02271	0.670334	0.00341418	1.37108	up		Ovis_aries_newGene_25721	0	0	0.0659385	0.00848685	0.0774499	0.0341632	Inf	up
ENSOARG00000016334	0.449475	0.1129	0.864135	0.0113207	0.0233131	0.0106376	0.0030103	-5.08807	down		ENSOARG00000014870	0.229358	0.701549	0.534804	2.29658	1.76802	1.12943	0.00366396	1.72185	up		ENSOARG00000020058	3.31369	3.05271	4.65401	1.60998	1.91159	1.90051	7.38777e-05	-1.06451	down		Ovis_aries_newGene_25809	0.148968	0.383852	0.0775662	0.0798674	0.0546645	0.0336027	-1.93443	down
ENSOARG00000016384	2.15384	0.842621	1.15858	0.647598	0.656392	0.632294	0.0260629	-1.1896	down		ENSOARG00000014877	0.0686826	0.0508266	0.0582366	0.102838	0.380537	0.181186	0.0406449	1.73205	up		ENSOARG00000020163	0.857059	3.72732	1.73379	0.0505686	0.0833102	0.0665244	0.000350703	-5.025	down		Ovis_aries_newGene_26284	0.134823	0.127154	0.273003	0.51067	0.29501	0.0317371	1.42366	up
ENSOARG00000016430	1.27767	0.35444	1.12425	3.80009	2.74461	6.98104	0.00249264	2.21181	up		ENSOARG00000014898	2.79132	1.99885	1.97705	4.95523	5.28585	4.84585	9.34987e-05	1.00268	up		ENSOARG00000020239	2.73271	1.8456	2.32964	6.05248	4.83267	3.93974	0.000401729	1.06689	up		Ovis_aries_newGene_26415	0.0950158	0.0504064	0.173158	0.393736	0.271184	0.0305207	1.90532	up
ENSOARG00000016539	0.42966	0.357848	0.286573	4.15207	2.02679	2.5047	1.87122e-05	2.9239	up		ENSOARG00000014968	4.86517	10.3169	7.36771	11.1661	23.0344	15.7349	0.0122294	1.01585	up		ENSOARG00000020288	1.32408	1.03289	1.0888	3.10648	2.54197	2.18445	0.0132865	1.14924	up		Ovis_aries_newGene_2732	0.208951	0.126685	0	0	0.051117	0.0465213	-3.32616	down
ENSOARG00000016569	8.94111	14.2697	18.0934	5.3376	7.32389	8.56313	0.0119188	-1.0829	down		ENSOARG00000015028	0.024144	0.0351844	0.0118107	0.0604826	0.0730145	0.107787	0.0297248	1.62159	up		ENSOARG00000020357	0.0161063	0.0481184	0	0.105105	0.35559	0.253962	0.00318039	3.41675	up		Ovis_aries_newGene_28579	0.110051	0.720052	0.0167132	0.0172091	0.0157048	0.0396537	-4.66896	down
ENSOARG00000016578	2.06645	1.94223	0.82362	0.627634	1.04541	0.555072	0.0194937	-1.23221	down		ENSOARG00000015039	0.400246	0.897394	1.10476	0.162572	0.128008	0.0179721	1.54836e-05	-3.06708	down		ENSOARG00000020380	0.597276	3.8067	0.576561	12.4724	20.7543	8.89454	1.94542e-05	3.03184	up		Ovis_aries_newGene_28926	0.167439	0.0799446	0.038143	0.00785492	0.0071683	0.0125151	-2.79542	down
ENSOARG00000016593	19.3289	25.335	37.0802	12.6013	14.6959	8.48926	0.00272348	-1.30956	down		ENSOARG00000015055	12.8101	13.1608	13.9337	9.09088	5.62058	7.06721	6.43217e-06	-1.00353	down		ENSOARG00000020390	0.283463	0.24335	0.167743	0.0820102	0.0656781	0.0513746	0.0256859	-1.83838	down		Ovis_aries_newGene_29389	16.0226	5.58575	2.10466	0.488086	0.766124	0.00564261	-3.26823	down
ENSOARG00000016604	1.07857	2.07135	5.12683	17.3703	13.8865	17.1361	3.64877e-15	2.43239	up		ENSOARG00000015074	69.0431	66.8152	69.9747	28.7527	30.5974	28.3753	1.47529e-09	-1.37189	down		ENSOARG00000020398	47.1139	35.9073	35.9015	137.895	89.4703	70.8945	0.00651767	1.29587	up		Ovis_aries_newGene_30942	0.420057	0.802234	0.0765519	0.0591173	0	0.000191237	-3.76867	down
ENSOARG00000016631	0.133607	0.20711	0.0279088	0.216326	0.409849	0.642344	0.0265648	1.65711	up		ENSOARG00000015088	11.3273	8.90939	11.4048	4.33821	5.29499	4.75231	2.82495e-08	-1.28548	down		ENSOARG00000020459	0.00695415	0.0346264	0.141718	0.0842781	0.447243	0.621361	0.0237225	2.60125	up		Ovis_aries_newGene_32664	0.403235	0.299486	0.128601	0.0567498	0.0517892	0.0328789	-2.15801	down
ENSOARG00000016747	2.50201	0.943074	2.59424	5.96265	3.26164	7.19182	0.00825407	1.35852	up		ENSOARG00000015129	9.9336	8.00733	9.42085	23.478	21.6442	18.978	1.61649e-06	1.0844	up		ENSOARG00000020525	0.869052	0.540903	0.39436	0.210331	0.336889	0.29646	0.0198986	-1.14573	down		Ovis_aries_newGene_3426	0.227142	0.542251	0	0.0532786	0.0972427	0.0498875	-2.9796	down
ENSOARG00000016790	14.5082	5.35885	11.7609	5.4277	4.31349	5.33667	0.0195131	-1.1553	down		ENSOARG00000015154	0.279191	0.319552	0.366929	0.825608	1.0976	0.491008	0.039852	1.18354	up		ENSOARG00000020574	10.4993	7.74386	6.49983	3.7496	2.93996	4.50468	0.000225498	-1.18126	down		Ovis_aries_newGene_34429	1.11619	1.67256	0.437168	0.284781	0.570077	0.000989392	-1.71051	down
ENSOARG00000016850	0.0814962	0.143292	0.119165	0.496729	0.536828	0.173587	0.0128445	1.68871	up		ENSOARG00000015172	0.621882	0.847634	1.07606	2.13566	2.30772	1.39636	0.00450494	1.07065	up		ENSOARG00000020591	0.084773	0.0492457	0.128811	0.00658573	0.0406867	0.00618836	0.0274417	-2.36773	down		Ovis_aries_newGene_34577	0.108007	1.28348	0.00984169	0.0101337	0.0184957	0.038065	-5.78199	down
ENSOARG00000016854	7.0003	20.3013	20.8096	6.23769	7.4907	4.93477	0.0222373	-1.49699	down		ENSOARG00000015177	1.98953	8.11276	2.21115	5.59588	23.4239	41.4969	0.0427292	2.39775	up		ENSOARG00000020752	877.288	937.418	667.76	2672.77	2558.5	1421.62	0.000749725	1.38424	up		Ovis_aries_newGene_37261	1.17745	0.455624	2.54342	2.76184	2.38995	2.80063e-05	1.62687	up
ENSOARG00000016969	0.295718	0.418357	0.153434	0.726548	0.498736	0.674583	0.0416034	1.0212	up		ENSOARG00000015180	1.05498	1.24913	0.689793	3.34554	3.24722	3.15936	5.37169e-06	1.56325	up		ENSOARG00000020773	0.766736	1.0866	1.42335	3.56016	3.87809	8.38275	0.00264565	2.23151	up		Ovis_aries_newGene_37704	0.562177	0.357886	0.187829	0.0175819	0.0802252	0.0140831	-2.26381	down
ENSOARG00000017047	9.62492	5.23217	5.56742	3.84142	0.66433	2.59256	0.00143075	-1.59596	down		ENSOARG00000015190	48.5721	64.9529	59.5963	30.2086	36.4682	22.0108	3.90536e-06	-1.09909	down		ENSOARG00000020776	14.6346	31.0736	27.8489	5.7922	11.3726	8.7377	0.00100552	-1.55482	down		Ovis_aries_newGene_38012	0.374524	0.173851	0.138641	0.0109811	0.0400848	0.0214059	-2.1038	down
ENSOARG00000017094	0.667745	0.923474	0.689215	1.95882	2.97039	3.41352	0.00737637	1.74988	up		ENSOARG00000015234	0.482902	0.946382	0.755378	2.45586	2.27199	1.25926	0.00199092	1.33628	up		ENSOARG00000020789	9.10039	4.72331	1.69574	46.3011	54.5965	32.3265	4.48725e-13	3.05644	up		Ovis_aries_newGene_38048	0.0559264	0.118677	0.00637007	0.0131181	0.0299286	0.0395966	-2.43528	down
ENSOARG00000017101	0	0	0	0.362904	0.0542425	0.264005	7.41997e-05	Inf	up		ENSOARG00000015242	0.91842	1.70977	2.20251	4.95795	4.60606	4.68216	1.82312e-07	1.44435	up		ENSOARG00000020860	0.57767	0.422994	0.21868	1.35424	0.595276	1.21299	0.015869	1.34586	up		Ovis_aries_newGene_3877	0.0199944	0.0212143	0.510134	0.525269	0.0684792	0.0215903	4.13759	up
ENSOARG00000017176	1.99022	2.41889	1.64803	4.81214	7.64215	8.19574	6.65227e-07	1.65017	up		ENSOARG00000015282	1.2759	2.13594	2.75068	3.37629	5.53896	5.23075	0.000347705	1.07073	up		ENSOARG00000020943	0.293909	0.120519	0.148348	0	0.116168	0.0151448	0.0456659	-2.1861	down		Ovis_aries_newGene_3919	0.669709	0.164953	0.0108972	0.0504923	0	0.0102242	-4.40613	down
ENSOARG00000017186	16.3563	16.0505	16.194	7.94448	9.05882	8.62728	4.50013e-05	-1.03351	down		ENSOARG00000015295	0.117721	0.505271	0.112293	0	0.0340295	0.0310549	0.0346672	-3.63065	down		ENSOARG00000020972	0.0558098	0.0972618	0.284336	0.221119	0.803575	0.452222	0.0415644	1.69967	up		Ovis_aries_newGene_39323	0.928259	2.32681	0.010573	0.0108866	0.0894151	3.45143e-05	-5.48379	down
ENSOARG00000017209	36.5319	21.4101	24.3324	91.3552	59.1986	40.0459	0.0354125	1.12375	up		ENSOARG00000015301	1.42188	1.55446	0.693329	4.62692	3.0308	3.13018	0.000528663	1.41721	up		ENSOARG00000020983	0.603103	0.8008	0.215624	1.48056	1.83324	0.933352	0.0215226	1.34659	up		Ovis_aries_newGene_39565	1.66012	2.0016	0.137519	0.0707997	0.0646109	0.000125218	-4.33909	down
ENSOARG00000017264	3.60124	1.7029	1.4493	0.471818	0.894519	0.752991	0.00691218	-1.77156	down		ENSOARG00000015349	1.22893	3.7001	3.43867	6.8608	6.33355	7.02112	0.000500044	1.16542	up		ENSOARG00000021051	0	0	0	0.0269079	0.0277063	0.0316055	0.0200364	Inf	up		Ovis_aries_newGene_39710	0.133323	0.0176821	0.728907	0.422175	0.228309	0.0314294	2.59473	up
ENSOARG00000017304	4.60232	6.16246	5.9531	3.65136	1.9005	2.75238	0.0238588	-1.11341	down		ENSOARG00000015398	0.00941413	0	0.0119735	0.140957	0.0362846	0.0496694	0.0242264	3.26771	up		ENSOARG00000021052	0.816187	1.18711	0.817828	2.44283	2.47922	2.34718	7.33168e-06	1.32631	up		Ovis_aries_newGene_39824	0.0177529	0.0565082	0.14559	0.266505	0.471218	0.0164205	2.95886	up
ENSOARG00000017398	5.62038	2.67347	32.987	67.4431	65.4813	89.686	2.14125e-07	2.32302	up		ENSOARG00000015407	0.873345	0.997139	1.13061	1.96147	2.72294	2.17225	0.0239212	1.05295	up		ENSOARG00000021053	0	0	0	0.118917	0.0376756	0.0859556	0.00118876	Inf	up		Ovis_aries_newGene_39941	0.0257682	0.076553	0.159665	0.299793	0.220635	0.0102773	2.11665	up
ENSOARG00000017418	0.711877	1.06655	0.408203	2.44898	3.91602	3.69264	1.54182e-08	2.07672	up		ENSOARG00000015431	9.49672	7.75989	14.273	3.60171	3.77292	3.67804	4.69866e-05	-1.65001	down		ENSOARG00000021057	0	0.0056472	0.00608229	0.824691	0.152413	0.447076	0.000112878	6.9133	up		Ovis_aries_newGene_40556	0.00966216	0.0205033	0.264127	0.244767	0.115822	0.00254431	3.76904	up
ENSOARG00000017468	2000.11	1828.1	2128.98	1136.58	1028.21	651.714	0.00960174	-1.18615	down		ENSOARG00000015436	0	0.141825	0.228518	0.717388	1.08492	0.800497	0.000716559	2.7195	up		ENSOARG00000021129	0.0116831	0	0.012531	0.0326743	0.0785019	0.194451	0.0308369	3.60886	up		Ovis_aries_newGene_41083	6.71103	11.914	0.159873	2.22232	3.86834	0.00193535	-2.20003	down
ENSOARG00000017583	4.7948	10.879	11.595	3.44609	3.7126	3.85656	0.00892309	-1.43256	down		ENSOARG00000015461	0	0	0.0576339	0.22899	0.235784	0.215174	0.0139177	3.46474	up		ENSOARG00000021140	0.965213	0.592624	0.0233518	0	0	0.0254291	0.00329793	-6.00646	down		Ovis_aries_newGene_41211	0.0204057	0.0216507	0.371876	0.287182	0.139775	0.0136461	3.64725	up
ENSOARG00000017584	560.971	424.791	578.978	81.8491	311.75	26.0913	5.72234e-07	-2.03151	down		ENSOARG00000015478	0.874957	0.885108	1.44775	0.286179	0.402715	0.896371	0.0214284	-1.15347	down		ENSOARG00000021154	0.100813	0.135146	0.282799	0.632568	0.46524	0.580814	0.000187398	1.66272	up		Ovis_aries_newGene_41405	0.158999	0.1205	1.53161	1.08688	1.49754	8.66771e-05	3.27864	up
ENSOARG00000017615	0.0176828	0.0159897	0	0.128265	0.0825443	0.135592	0.0334875	3.26781	up		ENSOARG00000015540	0	0	0.0221162	0.117162	0.0402128	0.220186	0.0184194	4.0077	up		ENSOARG00000021156	1.32695	1.25368	0.912343	3.61595	2.54747	8.10697	0.0227717	1.99284	up		Ovis_aries_newGene_42158	0.482241	0.59539	0.0719055	0.0658123	0.255253	0.00392833	-2.06269	down
ENSOARG00000017669	0.0129728	0.0117307	0	0.105863	0.0363346	0.143687	0.021489	3.4438	up		ENSOARG00000015584	0	0	0.106782	0.377124	0.129438	0.708738	0.0134332	3.42274	up		ENSOARG00000021170	2.26523	4.22967	4.44166	0.428945	0.560583	0.558089	5.13272e-08	-2.86327	down		Ovis_aries_newGene_42164	0.540266	0.40126	0.114869	0.10138	0.0308394	0.00637042	-2.5332	down
ENSOARG00000017695	24.1889	10.7434	15.0019	36.1892	39.828	30.9847	0.00011733	1.00663	up		ENSOARG00000015604	0.497739	0.742501	0.497145	1.36736	1.59977	1.18397	0.000438362	1.1233	up		Ovis_aries_newGene_10099	0.338887	0.36036	0.0061607	0.862096	1.02551	0.528313	0.00150942	1.73083	up		Ovis_aries_newGene_42980	1.42432	0.549536	0.235974	0.242975	0.0554339	0.0208553	-2.49266	down
ENSOARG00000017743	24.9807	27.8215	22.502	50.8915	60.2542	57.4658	6.77174e-05	1.04944	up		ENSOARG00000015684	0.890549	0.620759	1.38842	2.70176	2.45806	2.19014	0.000610211	1.20515	up		Ovis_aries_newGene_10238	0.0192467	0.0191668	0.0206436	0.107655	0.0923744	0.252899	0.0308712	2.90039	up		Ovis_aries_newGene_43990	3.46675	3.41051	1.56078	1.91785	1.07767	2.0466e-05	-1.20433	down
ENSOARG00000017758	1.58488	0.904401	2.48993	4.54128	4.75502	2.74652	0.00407361	1.17132	up		ENSOARG00000015709	1.93221	3.6311	4.73464	9.31623	8.46529	6.11665	0.000701914	1.09984	up		Ovis_aries_newGene_10508	0.206221	0.205365	0.304133	0.0480619	0.0247439	0.067743	0.0453606	-2.3788	down		Ovis_aries_newGene_45026	0.849666	0.40753	0.148481	0.0436818	0.16942	0.00252023	-2.39128	down
ENSOARG00000017795	5.89925	5.70513	9.36978	3.37663	3.82768	3.44943	0.00181652	-1.08859	down		ENSOARG00000015775	50.6053	29.0987	69.8328	26.9123	19.5149	8.90804	0.00562456	-1.57043	down		Ovis_aries_newGene_10625	0.0398024	0.0396372	0.0284607	0.185527	0.191031	0.26731	0.0125651	2.53621	up		Ovis_aries_newGene_45287	0.932495	0.818804	0	0.211184	0.165192	0.00296461	-2.85543	down
ENSOARG00000017894	0.114802	0.193464	0.391686	0.487341	0.613852	0.800276	0.0110557	1.32075	up		ENSOARG00000015843	0.170862	0.328749	0.122239	1.60693	2.2473	2.15228	1.91441e-09	3.13979	up		Ovis_aries_newGene_10844	0.0184291	0.0367052	0.0197666	1.39161	0.619151	2.76057	8.64608e-05	5.96116	up		Ovis_aries_newGene_45462	0.28119	0.24646	0.0111401	0.0573532	0.0523398	0.00683923	-2.75425	down
ENSOARG00000017912	0.0259119	0.00468617	0.00505183	0.056387	0.0580599	0.0618155	0.0498778	2.2372	up		ENSOARG00000015846	12.0743	23.5355	17.8625	8.42873	8.15446	7.53894	0.000104152	-1.26862	down		Ovis_aries_newGene_10947	0.780347	1.54034	0.478274	0.0649526	0.0802556	0.366201	0.0092915	-2.49631	down		Ovis_aries_newGene_45984	0.0648665	0.0688241	0.886604	0.608605	0.833108	0.0185697	3.52178	up
ENSOARG00000017965	7.05868	5.9573	9.68068	91.8389	11.347	71.5875	0.0164767	2.86233	up		ENSOARG00000015862	0	0	0	0.0406555	0.0418617	0.101873	0.0169913	Inf	up		Ovis_aries_newGene_11175	0.647875	1.147	1.00374	5.03312	6.21894	2.52237	0.000515366	2.25764	up		Ovis_aries_newGene_46734	0.266294	0.565082	0	0	0	0.00071542	#NAME?	down
ENSOARG00000018005	1.09201	0.94631	1.12364	10.8503	0.934556	10.4024	0.0260145	2.72834	up		ENSOARG00000015902	0.175158	0.168987	0.189773	0.0655654	0.0225035	0.0753003	0.0284772	-1.83499	down		Ovis_aries_newGene_11417	1.5028	1.46602	0.0986858	12.38	2.22268	9.85987	0.00791486	2.97413	up		Ovis_aries_newGene_49017	0.0329722	0.0349839	2.10312	1.29931	3.47251	6.69152e-06	6.05913	up
ENSOARG00000018032	0.255512	0.134777	0.186807	2.85733	1.21262	3.93668	7.76757e-05	3.71041	up		ENSOARG00000015942	4.23852	6.24649	4.57837	1.11398	0.912407	2.28384	2.489e-10	-1.9337	down		Ovis_aries_newGene_11547	0.0532413	0.265101	0.713815	0.0124084	0.0127765	0.0116597	0.0227056	-4.84286	down		Ovis_aries_newGene_4989	0.362864	0.0836963	0.0143759	0.0148024	0.0135085	0.0272386	-3.99614	down
ENSOARG00000018176	0.060478	0.0546873	0	0.301598	0.225852	0.360692	0.025282	2.84976	up		ENSOARG00000016003	0.0622046	0.257783	0.0949388	0.468019	0.402786	0.433216	0.0148832	1.54977	up		Ovis_aries_newGene_12413	0.544366	0.754235	0.736188	0.198579	0.0908757	0.124398	0.00453341	-2.32229	down		Ovis_aries_newGene_50500	0.65285	1.46233	0.066098	0.272236	0.12422	0.0146749	-2.82182	down
ENSOARG00000018187	6.94752	2.41801	6.16835	2.09829	2.3332	3.19813	0.037372	-1.11748	down		ENSOARG00000016054	0.0398225	0.108448	0.0506488	0.290676	0.110511	0.394998	0.016866	1.89737	up		Ovis_aries_newGene_15575	0.303668	0.244806	0.232647	0.0134805	0.0138805	0.0380014	0.000781538	-3.62082	down		Ovis_aries_newGene_51011	0.554644	0.0871828	1.1231	2.69832	3.95752	0.00638688	2.97867	up
ENSOARG00000018264	0.0213912	0.0322383	0.0208523	0.174561	0.0931983	0.0911267	0.0332919	2.16256	up		ENSOARG00000016068	0.855313	0.487606	0.443194	0.0355736	0.183145	0.167136	0.0141862	-2.39444	down		Ovis_aries_newGene_15772	2.64471	3.34468	6.02136	4.85538	12.0391	10.5035	0.0231057	1.13858	up		Ovis_aries_newGene_51851	0.0146464	0.01554	0.133459	0.398514	0.689735	0.00748258	4.71953	up
ENSOARG00000018341	42.1974	53.4982	22.2568	984.869	1246.79	192.683	0.000703737	4.24148	up		ENSOARG00000016091	0	0.0406103	0	0.0770316	0.356926	0.180959	0.0382394	3.82483	up		Ovis_aries_newGene_15820	0.0607735	0.242085	0.0325921	0.708193	0.991718	0.18633	0.0236585	2.44561	up		Ovis_aries_newGene_53	0.608473	0.603493	0.0120532	0.0744646	0.260496	0.00262669	-2.42278	down
ENSOARG00000018383	1.92915	2.80557	1.23926	4.19158	6.27472	8.64993	0.00111197	1.55628	up		ENSOARG00000016164	1.05868	0.731639	0.65401	1.15489	2.14347	2.20689	0.0102554	1.00585	up		Ovis_aries_newGene_16265	0.275384	0.106649	0.0984568	0.0142625	0.0146856	0.0670095	0.0376141	-2.36867	down		Ovis_aries_newGene_53560	0.266294	0.0235451	0.343753	1.7073	1.53906	0.0175885	3.00076	up
ENSOARG00000018385	4.26743	2.35898	4.89774	11.4182	8.96052	12.307	9.6215e-06	1.40914	up		ENSOARG00000016166	0	0	0.013181	0.128016	0.0359494	0.0437427	0.0281867	3.90593	up		Ovis_aries_newGene_16272	0.328205	0.0891388	0.128009	0.027815	0.0286402	0	0.0270133	-3.31237	down		Ovis_aries_newGene_54146	0.0165103	0.0875882	0.240709	0.402758	0.438235	0.0121373	2.76442	up
ENSOARG00000018411	0.802242	0.806031	0.608248	1.29316	1.49796	1.99629	0.046522	1.001	up		ENSOARG00000016175	18.1631	15.1647	13.507	43.2755	28.6698	33.0894	0.00113624	1.02392	up		Ovis_aries_newGene_16833	0.388204	0.414207	0.0297413	0.02585	0.0798506	0.0242902	0.0412521	-2.74148	down		Ovis_aries_newGene_54646	0.750778	1.24683	0.634541	0.347101	0.400609	0.046723	-1.12612	down
ENSOARG00000018645	2.65893	3.52636	3.05717	4.5003	8.22376	8.75959	0.0026742	1.09374	up		ENSOARG00000016228	0.0627034	0.0494953	0.0797501	0.56331	0.205425	0.474184	0.00185617	2.56891	up		Ovis_aries_newGene_17111	0.145433	0.376556	0.218383	0.0135578	0.0418802	0.0509591	0.00502686	-2.85205	down		Ovis_aries_newGene_55788	1.98563	2.42679	6.91665	4.29198	4.67004	0.00687763	1.24987	up
ENSOARG00000018673	20.0841	18.3769	11.0457	47.633	45.3317	39.4166	3.54126e-07	1.31449	up		ENSOARG00000016314	0.171063	0.101272	0.25383	2.40122	0.626356	1.05296	0.0177084	2.83592	up		Ovis_aries_newGene_17746	0.0436106	0.0434296	0	0.3659	0.125585	0.267417	0.047508	3.0978	up		Ovis_aries_newGene_56799	0.0768701	0.016312	0.350223	0.721228	0.1448	0.0422578	3.08255	up
ENSOARG00000018757	43.6063	48.9336	39.4881	105.505	148.98	213.236	0.000162932	1.70972	up		ENSOARG00000016350	0.602824	0.340902	0.228869	0.777988	1.186	1.39563	0.00983703	1.34354	up		Ovis_aries_newGene_18019	0.514429	0.531998	0.0070739	1.70309	1.58269	0.46219	0.0360834	1.7915	up		Ovis_aries_newGene_57164	1.44626	2.74725	0.233812	0.218862	0.858843	0.00238736	-2.28384	down
ENSOARG00000018784	1.26156	0.380254	0.564898	0.0511485	0.196301	0.410714	0.0389343	-1.83766	down		ENSOARG00000016430	0.763829	0.562096	1.4669	3.80009	2.74461	6.98104	0.00259729	2.14554	up		Ovis_aries_newGene_18159	2.28746	4.40532	1.64241	0.0881181	0.616981	0.215283	0.000279879	-3.24813	down		Ovis_aries_newGene_58153	0.654539	0.0462983	1.19284	1.55576	2.16702	0.0134984	2.19629	up
ENSOARG00000018837	0.0989719	0.121458	0	0.352546	0.389406	0.397529	0.00250431	2.25666	up		ENSOARG00000016539	0.273883	0.464811	0.371564	4.15207	2.02679	2.5047	2.61564e-05	2.85553	up		Ovis_aries_newGene_18227	0.244777	0.262512	0.383715	0.280851	1.50014	1.13809	0.0478365	1.65164	up		Ovis_aries_newGene_58347	0.0480767	0.0918178	0	0	0	0.00225497	#NAME?	down
ENSOARG00000018851	9.99216	16.6097	21.1749	80.8386	62.4197	70.3991	2.57387e-13	2.04686	up		ENSOARG00000016593	24.7314	24.7865	16.6632	12.6013	14.6959	8.48926	0.000646633	-1.03484	down		Ovis_aries_newGene_18287	0.105842	0.263506	0.0567615	1.23337	0.507985	0.649013	0.0183144	2.46438	up		Ovis_aries_newGene_59070	0.383925	0.872891	0.199906	0.0514593	0.0469611	0.0286471	-2.65354	down
ENSOARG00000018879	10.604	13.0468	12.8222	8.53766	6.14015	4.88757	0.00292537	-1.00559	down		ENSOARG00000016604	6.07117	4.22273	3.4178	17.3703	13.8865	17.1361	3.71091e-11	1.66575	up		Ovis_aries_newGene_18448	1.66924	1.0594	1.34511	0.0886914	1.14568	0.712178	0.0280718	-1.13407	down		Ovis_aries_newGene_62238	0.071312	0.0756629	2.66418	1.6727	1.89284	0.000138781	4.80735	up
ENSOARG00000019042	0.235761	0.0103994	0.140136	0.00521384	0.0107371	0.00489925	0.014292	-4.29689	down		ENSOARG00000016631	0.0770552	0.255461	0.0294011	0.216326	0.409849	0.642344	0.0316805	1.68797	up		Ovis_aries_newGene_18628	1.66935	0.561067	1.02954	0.0194529	0.02003	0.146233	3.84703e-05	-4.17762	down		Ovis_aries_newGene_62634	0.0115674	0.135005	0.600799	0.466681	0.633878	0.000621011	2.93682	up
ENSOARG00000019043	9.41462	7.87113	0.512708	0.166912	0.024552	0.112029	0.000481777	-5.94983	down		ENSOARG00000016670	27.3233	97.8734	57.2462	138.682	147.246	125.437	0.000518893	1.06528	up		Ovis_aries_newGene_18630	0.644778	0.342454	0.414944	0.200362	0.0412614	0.0753092	0.0455685	-2.1591	down		Ovis_aries_newGene_63569	1.02214	1.42341	0.116423	0.179815	0.492291	0.0278914	-2.24495	down
ENSOARG00000019062	0.445408	1.0387	0.434188	1.87049	1.89316	5.22296	0.0269335	2.10176	up		ENSOARG00000016744	0.0915794	0.173493	0.155302	0.342802	0.670647	0.470292	0.00566321	1.68792	up		Ovis_aries_newGene_1908	1.47675	0.198286	0.0177969	2.69149	1.16269	1.7442	0.0485206	1.69436	up		Ovis_aries_newGene_64993	1.20307	0.44913	0.0101505	0.0104516	0.00953801	3.72183e-05	-6.38518	down
ENSOARG00000019067	0.575935	1.02918	0.828774	2.05153	2.56048	1.76418	0.00911089	1.26462	up		ENSOARG00000016771	0.456929	0.527493	0.58115	2.12943	1.50576	1.19333	0.00266531	1.49845	up		Ovis_aries_newGene_19119	0.045061	0.014958	0	1.17621	0.028836	0.56578	0.0221621	4.87177	up		Ovis_aries_newGene_6556	0.0292546	0.372474	0.90634	0.603855	1.35263	0.013971	2.23387	up
ENSOARG00000019090	1.62145	1.17848	1.5976	2.0472	3.64208	4.04417	0.00363946	1.0357	up		ENSOARG00000016840	2.20663	2.91397	1.20102	3.09883	5.56688	6.8821	0.0149096	1.15018	up		Ovis_aries_newGene_19149	0.0324504	0	0	0.0302516	0.373789	0.255836	0.0210634	4.27135	up		Ovis_aries_newGene_66177	0.398723	0.69024	0.0509923	0.196894	0.251557	0.00716205	-1.74679	down
ENSOARG00000019099	1.32466	1.91114	1.36384	2.90824	4.20345	4.21011	0.000473985	1.17747	up		ENSOARG00000016912	0.187737	0.198888	0.263909	0.654657	0.788331	0.469187	0.0276986	1.41866	up		Ovis_aries_newGene_19393	0	0	0	1.29413	0.249848	0.304011	0.0294286	Inf	up		Ovis_aries_newGene_68012	1.07938	0.477181	0.437128	0.0562622	0.12836	0.0362122	-1.89948	down
ENSOARG00000019118	13.2678	18.4867	24.4411	6.24062	10.3943	9.70024	0.00225442	-1.21696	down		ENSOARG00000016918	0.635298	0.473998	0.343128	0.166138	0.150942	0.183664	0.0100314	-1.69093	down		Ovis_aries_newGene_19407	0.0136747	0.0136179	0.0146671	0.101985	0.091884	0.407282	0.0325103	3.80023	up		Ovis_aries_newGene_68486	1.1002	0.963282	0.00407526	0.293732	0.0574405	9.03742e-11	-3.18757	down
ENSOARG00000019140	6.07048	4.93746	5.06634	11.6856	12.0127	13.58	7.20876e-05	1.10937	up		ENSOARG00000017094	1.58575	0.22531	1.45214	1.95882	2.97039	3.41352	0.037315	1.17865	up		Ovis_aries_newGene_19781	3.98872	2.83726	2.98252	1.08897	2.00737	1.07318	1.20563e-05	-1.28506	down		Ovis_aries_newGene_69415	0.0223529	0.0237167	0.264786	0.188752	0.306228	0.0226871	3.44187	up
ENSOARG00000019143	5.72735	4.6169	5.648	15.9314	15.5543	13.7786	5.33537e-07	1.39697	up		ENSOARG00000017101	0	0	0.0198882	0.362904	0.0542425	0.264005	0.00102417	5.02566	up		Ovis_aries_newGene_21077	0.627595	0.374994	0.224381	0	0.0803235	0.0366511	0.00748821	-3.46859	down		Ovis_aries_newGene_70434	0.109456	0.0387113	0.232719	0.77022	0.859091	0.00687681	3.02742	up
ENSOARG00000019163	1.12385	0.466925	1.74695	18.177	20.8715	19.2541	6.76648e-25	4.02633	up		ENSOARG00000017129	0.101845	0.108918	0.0835696	0.166019	0.296303	0.287736	0.0455778	1.19931	up		Ovis_aries_newGene_21635	0.0291251	0.0580085	0.0156194	0.285092	0.167743	0.102053	0.0290817	2.40513	up		Ovis_aries_newGene_70457	0.159766	0.233081	0.0181975	0.0562122	0.0170995	0.0342032	-2.72927	down
ENSOARG00000019208	0.0593866	0.0859207	0.0115781	0.183078	0.27722	0.293466	0.023873	2.14147	up		ENSOARG00000017176	2.40179	3.41665	3.30748	4.81214	7.64215	8.19574	0.000208065	1.04261	up		Ovis_aries_newGene_21887	0	0.0754777	0	0.494596	0.291011	0.464753	0.0249534	4.01968	up		Ovis_aries_newGene_70472	0.755275	0.304515	0.0963498	0.141726	0.0388013	0.00803329	-2.55211	down
ENSOARG00000019239	0.0696771	0.0472542	0.0849024	0	0	0	0.0136139	#NAME?	down		ENSOARG00000017264	1.28047	1.65036	1.46742	0.471818	0.894519	0.752991	0.00277243	-1.19618	down		Ovis_aries_newGene_23309	1.11985	0.5904	0.459252	0.0307049	0.442622	0.0288522	0.0118576	-2.19405	down		Ovis_aries_newGene_70590	1.85528	2.65954	1.23494	0.302463	0.57458	0.00107008	-1.67897	down
ENSOARG00000019246	0.147382	0	0.0522435	3.1343	1.17583	1.44976	4.02742e-05	4.80774	up		ENSOARG00000017314	0.252615	0.396771	0.399975	0.897347	0.81667	0.728963	0.0161138	1.0964	up		Ovis_aries_newGene_24573	0.675054	0.201676	0.333061	0.0125862	0.0129597	0.130095	0.00606379	-3.00334	down		Ovis_aries_newGene_71372	0.219315	0.279234	0	0	0.0375567	0.0209474	-4.34058	down
ENSOARG00000019248	34.2415	37.832	24.0388	9.6914	12.2242	3.21985	6.02876e-08	-2.05116	down		ENSOARG00000017389	4.36501	3.80524	3.35541	8.5215	8.08658	9.95097	9.19956e-05	1.05805	up		Ovis_aries_newGene_25084	0.303668	0.129603	0.0465295	0.808831	0.832828	1.33005	0.00487063	2.58649	up		Ovis_aries_newGene_71457	0.0570738	0.0605559	0.988115	0.910333	0.195473	0.0236702	3.55048	up
ENSOARG00000019255	0.0686965	0.0621189	0.0372034	0.352964	0.0926407	0.221112	0.0329017	1.90345	up		ENSOARG00000017398	28.4336	2.23883	7.57543	67.4431	65.4813	89.686	8.49283e-08	2.33362	up		Ovis_aries_newGene_25636	0.0598904	0.134194	0.128474	0.516447	0.546142	0.31478	0.0102811	2.05641	up		Ovis_aries_newGene_73	0.0373126	0.0791782	1.01999	0.490116	0.575066	0.00529927	3.56983	up
ENSOARG00000019272	1.41284	1.30554	0.824341	3.62805	6.26787	10.5086	0.00160685	2.41441	up		ENSOARG00000017418	1.24537	1.92827	1.3976	2.44898	3.91602	3.69264	0.000736797	1.00144	up		Ovis_aries_newGene_25809	0.239212	0.217504	0.211951	0.0775662	0.0798674	0.0546645	0.0442597	-1.696	down		Ovis_aries_newGene_7360	0.171995	0.078802	0.309885	0.4071	0.415025	0.00983404	1.56169	up
ENSOARG00000019279	0.345456	0.364443	0.498116	1.05062	0.833182	0.791011	0.0415371	1.04046	up		ENSOARG00000017421	3.48407	3.104	2.97145	9.80793	8.50477	8.75032	1.06192e-07	1.35893	up		Ovis_aries_newGene_26284	0.0780924	0.1847	0.18846	0.273003	0.51067	0.29501	0.0292841	1.20888	up		Ovis_aries_newGene_9408	0.030748	0.195744	0.924589	1.7021	0.526547	0.00612893	3.18277	up
ENSOARG00000019300	24.7346	13.9286	12.2287	5.71648	8.04893	4.151	0.000756003	-1.60732	down		ENSOARG00000017432	0.108533	0.0700945	0.138039	0.531834	0.250989	0.426865	0.0182818	1.80157	up		Ovis_aries_newGene_26318	0.34868	0.0385814	0.249324	0.794575	0.966903	1.35751	0.00735875	2.24865	up
ENSOARG00000019334	0.0399112	0	0	0.337754	0.0869436	0.30604	0.000689006	4.17251	up		ENSOARG00000017475	0.431489	2.24795	0.993607	2.72877	3.16685	2.52098	0.00732144	1.0938	up		Ovis_aries_newGene_26387	1.40577	0.524975	0.353389	0.0204767	0.29518	0.15393	0.0469261	-2.35563	down
ENSOARG00000019344	2.55761	1.99516	2.51551	1.81368	1.34716	0.513875	0.00427693	-1.04173	down		ENSOARG00000017584	326.157	453.556	345.549	81.8491	311.75	26.0913	0.0010899	-1.58183	down		Ovis_aries_newGene_26482	0.121959	0.0404843	0.0436035	0.644273	0.351205	0.498564	0.0141586	2.82641	up
ENSOARG00000019370	0.553323	0.775284	1.10013	0.454514	0.444983	0.394416	0.0121381	-1.02379	down		ENSOARG00000017671	0.353977	0.269435	0.627079	0.709829	1.21327	1.16058	0.0419965	1.15877	up		Ovis_aries_newGene_27309	0.15187	0.371225	0.621952	0.540576	1.12648	1.02801	0.0364564	1.18711	up
ENSOARG00000019394	1.4483	0.851694	0.915007	2.24324	2.23451	2.83342	0.000342609	1.08937	up		ENSOARG00000017682	54.0015	64.5611	75.1338	39.242	35.3881	31.1612	1.91012e-05	-1.00203	down		Ovis_aries_newGene_2732	0.116707	0.0871667	0.344236	0	0	0.051117	0.034649	-3.46332	down
ENSOARG00000019435	0.887379	0.691736	0.459359	1.8589	1.96547	3.35269	0.000335169	1.71434	up		ENSOARG00000017754	0.242213	0.350518	0.308061	5.62126	0.902435	3.60659	0.0073198	3.38631	up		Ovis_aries_newGene_27525	0.00402904	0.300924	0.0302501	0.259166	0.502771	0.303528	0.0392113	1.61853	up
ENSOARG00000019441	34.8757	85.3743	110.888	26.3026	20.4897	18.7912	0.00728653	-1.93687	down		ENSOARG00000017758	1.67724	1.30187	0.632064	4.54128	4.75502	2.74652	0.000202339	1.57776	up		Ovis_aries_newGene_27529	0.711726	0.854695	0.224523	0.370779	0.0200936	0.0183372	0.0234943	-2.12475	down
ENSOARG00000019459	0.0388515	0	0.0568092	0.281816	0.163225	0.165508	0.00832798	2.5987	up		ENSOARG00000017894	0.185388	0.334247	0.214353	0.487341	0.613852	0.800276	0.00810174	1.2448	up		Ovis_aries_newGene_27798	0.290598	0.3157	0.878393	0.197023	0.0253586	0.0231419	0.022347	-2.59474	down
ENSOARG00000019480	17.6882	23.982	31.0283	7.27701	9.36741	11.6584	0.000140811	-1.47947	down		ENSOARG00000017913	0.400286	1.08399	0.735939	2.04726	1.75056	2.30848	1.96616e-05	1.34927	up		Ovis_aries_newGene_28031	0.152637	0.177338	0.191001	0.0237157	0.0244193	0.0222848	0.0352681	-2.92611	down
ENSOARG00000019575	0.474465	0.166847	0.214127	3.72842	1.53398	6.75239	0.00143038	3.73768	up		ENSOARG00000017917	0.450505	0.428479	0.375725	1.0201	1.11868	1.35599	0.00461742	1.33246	up		Ovis_aries_newGene_28626	0.137891	0.164782	0.354955	0.0128547	0.0397082	0.0483163	0.00801572	-2.75634	down
ENSOARG00000019657	0	0	0	0.0741689	0.0152739	0.055755	0.0441696	Inf	up		ENSOARG00000017965	6.13172	6.50002	7.4321	91.8389	11.347	71.5875	0.0134036	3.01016	up		Ovis_aries_newGene_29061	0.18825	0.165414	0.0831405	0.0344106	0.0318884	0.0743691	0.0177835	-1.67595	down
ENSOARG00000019683	0.153311	0.315071	0.106426	0.0315928	0.0281928	0.0455194	0.00715142	-2.57136	down		ENSOARG00000018005	1.57975	0.797488	0.700891	10.8503	0.934556	10.4024	0.0295785	2.70286	up		Ovis_aries_newGene_29387	0.705899	0.868374	0.846204	0.296775	0.0132861	0.133372	0.000209516	-2.45387	down
ENSOARG00000019703	0.432956	0.314736	0.289642	0.900592	1.0462	0.990911	0.00969934	1.39853	up		ENSOARG00000018007	0.217851	0.263805	0.346346	0.761718	0.641193	0.668737	0.0126208	1.19672	up		Ovis_aries_newGene_29389	4.35256	7.23091	12.6746	2.10466	0.488086	0.766124	0.000745503	-2.86332	down
ENSOARG00000019715	0	0.0642436	0.0173141	0.265726	0.240445	0.393455	0.000342186	3.30856	up		ENSOARG00000018022	2.24607	3.47625	2.8567	6.05343	7.84694	5.45118	0.00178285	1.04175	up		Ovis_aries_newGene_32219	0.020314	0.262986	0.0217883	1.19306	1.96944	3.1319	1.38932e-06	4.32042	up
ENSOARG00000019751	0.236032	0.0164179	0.123893	0.0164626	0	0	0.0230797	-4.53641	down		ENSOARG00000018032	0.395421	0.122137	0.437323	2.85733	1.21262	3.93668	0.00065398	2.92085	up		Ovis_aries_newGene_34577	0.717879	0.126159	0.113232	0.00984169	0.0101337	0.0184957	0.0425499	-4.68237	down
ENSOARG00000019762	0.570784	0.330725	0.253894	1.33655	1.82631	0.788481	0.00138018	1.67289	up		ENSOARG00000018044	3.66749	2.21581	3.19075	8.00921	9.39911	23.5438	0.0235491	2.0186	up		Ovis_aries_newGene_36293	0.0206189	0	0.0442307	0.230661	0.277089	0.252868	0.00436124	3.51222	up
ENSOARG00000019793	3.01139	0.755613	1.96727	7.34795	4.66616	8.51656	0.000150912	1.76376	up		ENSOARG00000018127	0.702696	0.738414	0.625613	2.70268	2.94537	1.06126	0.00947089	1.55727	up		Ovis_aries_newGene_36316	0.800691	0.281424	0.311526	1.3831	2.26053	0.777039	0.0203831	1.61432	up
ENSOARG00000019845	0.0381304	0.0689589	0.0619498	0.0115244	2.20714	0.985444	0.0378732	4.08821	up		ENSOARG00000018134	12.0175	8.19211	6.77238	1.77736	4.40529	6.21522	0.0135579	-1.29131	down		Ovis_aries_newGene_36452	0.923889	0.354878	0.99094	0.0861286	0.367405	0.13874	0.00499473	-2.00151	down
ENSOARG00000019864	0.394162	0	1.00492	4.70106	0.622759	3.35827	0.0316784	2.56333	up		ENSOARG00000018146	3.03181	3.56993	3.67496	1.74933	1.8206	1.58192	0.00049647	-1.13051	down		Ovis_aries_newGene_36694	0.0111497	0.0333102	0.0239178	0.176701	0.513723	0.0586021	0.047877	3.39386	up
ENSOARG00000019883	0.405755	0.241108	0	0.0315345	0.03247	0	0.0443465	-3.42821	down		ENSOARG00000018173	0.963019	0.660143	1.54715	10.1883	11.018	14.9219	3.47762e-12	3.37077	up		Ovis_aries_newGene_36810	0.0197897	0.0788302	0.0212259	0.202936	0.322933	0.0866779	0.0493485	2.30588	up
ENSOARG00000020004	5.28164	3.81223	3.83993	2.73882	2.01198	1.57022	0.000168225	-1.12831	down		ENSOARG00000018187	6.89699	7.84133	5.17903	2.09829	2.3332	3.19813	9.09578e-08	-1.52687	down		Ovis_aries_newGene_37051	0	0.0227847	0.0245402	0	0.50513	0.561187	0.018332	4.43238	up
ENSOARG00000020029	0.127094	0.114925	0.265485	0.471927	1.02271	0.670334	0.000444137	1.97066	up		ENSOARG00000018197	0.204898	0.229837	0.288033	0.557067	0.92274	0.500697	0.0104262	1.31251	up		Ovis_aries_newGene_37207	0.701482	0.931427	0.815091	0.0544957	0.22445	0.0512076	0.0065611	-2.95504	down
ENSOARG00000020052	0.0664665	1.62276	2.78606	0.361595	0.0620539	0.0566296	0.0441417	-3.3226	down		ENSOARG00000018200	0.812212	0.665318	0.99404	0.0573639	0.295329	0.285684	1.52371e-05	-2.11336	down		Ovis_aries_newGene_37214	5.69928	3.14579	6.12475	2.34764	2.03562	2.56398	0.00317944	-1.1444	down
ENSOARG00000020058	9.45523	3.17611	6.33402	1.60998	1.91159	1.90051	0.00276671	-1.89656	down		ENSOARG00000018235	1.27652	1.71889	2.15678	0.871334	0.940597	0.825363	0.0031045	-1.09406	down		Ovis_aries_newGene_37261	0.656685	0.80228	0.39937	2.54342	2.76184	2.38995	1.21701e-09	2.00857	up
ENSOARG00000020163	1.36082	10.9941	5.3388	0.0505686	0.0833102	0.0665244	0.000446964	-6.61517	down		ENSOARG00000018325	0.288524	0.406413	0.43656	0.793249	0.690239	1.08133	0.0152809	1.0551	up		Ovis_aries_newGene_37699	0.00547305	0.00545033	0.211329	0.229599	0.609413	0.258894	0.0162943	2.25455	up
ENSOARG00000020242	29.2365	42.8061	64.9638	24.7571	25.7002	16.9973	0.0200173	-1.13959	down		ENSOARG00000018341	191.725	13.7977	13.3835	984.869	1246.79	192.683	0.00671332	3.23784	up		Ovis_aries_newGene_37986	0.342245	0.340825	0.734168	0.106352	0.0547534	0.0499673	0.00627858	-2.77098	down
ENSOARG00000020249	4.96895	3.0628	1.50715	1.40996	1.6437	1.066	0.037467	-1.30853	down		ENSOARG00000018351	0.427657	0.168787	0.302178	1.01385	1.53842	1.20338	0.0331236	1.89121	up		Ovis_aries_newGene_38037	0.00971982	0.0580769	0.0521262	0.235591	0.951663	0.238405	0.0218417	3.50972	up
ENSOARG00000020337	4.23375	7.17821	4.88737	2.87909	3.35458	2.39687	0.0136837	-1.04006	down		ENSOARG00000018392	24.4349	24.2405	37.7855	18.9131	13.3148	14.479	0.000992719	-1.01543	down		Ovis_aries_newGene_38577	60.1145	35.6337	62.9536	31.1609	32.3417	17.4987	0.00532605	-1.00927	down
ENSOARG00000020371	2.9062	1.33516	2.57407	6.91356	5.54323	5.41812	2.62355e-05	1.30062	up		ENSOARG00000018398	0.208116	0.246416	0.343387	0.637956	0.539815	0.74191	0.0252538	1.13971	up		Ovis_aries_newGene_38741	0.233827	0.151357	0.376196	0.0108991	0.0112225	0.0102415	4.38193e-05	-4.59438	down
ENSOARG00000020380	0.245637	0.111059	0.598624	12.4724	20.7543	8.89454	1.44793e-10	5.34924	up		ENSOARG00000018445	0.349464	0.248266	0.320019	0.792721	0.81624	0.892393	0.0123002	1.29735	up		Ovis_aries_newGene_3919	0.268854	0.0582039	0.325979	0.0108972	0.0504923	0	0.00332114	-3.48146	down
ENSOARG00000020385	0.0878184	0.15882	0.428031	3.82204	1.96772	1.42161	0.00078508	3.31236	up		ENSOARG00000018493	0.363376	0.875865	0.495176	1.2679	1.24549	1.56114	0.0350806	1.11541	up		Ovis_aries_newGene_39710	0.0977361	0.0162217	0.0174715	0.728907	0.422175	0.228309	0.00189683	3.36068	up
ENSOARG00000020390	0.472339	0.227188	0.470238	0.0820102	0.0656781	0.0513746	0.00118397	-2.64687	down		ENSOARG00000018575	0.30965	0.433703	0.480283	1.14495	0.799046	0.944373	0.00366518	1.11824	up		Ovis_aries_newGene_39824	0.0867622	0.0518413	0.093059	0.14559	0.266505	0.471218	0.0421136	1.88338	up
ENSOARG00000020427	321.166	309.741	262.683	140.087	304.949	35.1128	0.0282815	-1.02235	down		ENSOARG00000018595	3.09732	6.56565	6.52964	2.10377	2.75868	2.35567	0.00127135	-1.28652	down		Ovis_aries_newGene_40556	0.0849977	0.00940498	0.0303888	0.264127	0.244767	0.115822	0.0119828	2.28385	up
ENSOARG00000020481	0.0711642	0	0.0115619	0.0752796	0.321125	0.808428	0.0342486	3.80456	up		ENSOARG00000018650	0.0876121	0.103736	0.312006	0.826437	0.688869	0.480735	0.01577	1.8734	up		Ovis_aries_newGene_41083	12.2618	12.4671	3.40288	0.159873	2.22232	3.86834	0.0104016	-2.23086	down
ENSOARG00000020487	5.26347	7.11338	4.57318	2.4381	2.62394	1.87666	3.26814e-05	-1.40507	down		ENSOARG00000018673	14.97	12.2021	14.7415	47.633	45.3317	39.4166	3.1581e-11	1.51573	up		Ovis_aries_newGene_41211	0.0199453	0.0198626	0.0213929	0.371876	0.287182	0.139775	0.00286328	3.67398	up
ENSOARG00000020495	1.96081	4.47518	2.12089	4.28642	9.55443	11.8316	0.0168106	1.44867	up		ENSOARG00000018757	37.0758	76.2351	61.9808	105.505	148.98	213.236	0.00250094	1.29185	up		Ovis_aries_newGene_4192	0.321068	0.179851	0.193708	0.617331	0.924576	0.738287	0.0214086	1.66736	up
ENSOARG00000020503	2.21122	0.778875	0.886646	0.340956	0.483099	0.399795	0.023616	-1.75319	down		ENSOARG00000018798	8.21588	5.66378	10.8416	4.95706	3.90785	3.35647	0.00306079	-1.15377	down		Ovis_aries_newGene_42187	0.0561983	0.03731	0.0401846	0.261951	0.161834	0.344604	0.0194458	2.48891	up
ENSOARG00000020507	0.075195	0.0951932	0	0	0	0	0.0285471	#NAME?	down		ENSOARG00000018837	0.136993	0.162204	0.0943778	0.352546	0.389406	0.397529	0.0303496	1.39149	up		Ovis_aries_newGene_4255	1.09899	0.243206	0.232839	1.16365	1.58889	2.13934	0.00462457	1.58647	up
ENSOARG00000020525	3.33781	0.640935	1.15158	0.210331	0.336889	0.29646	0.0361838	-2.6855	down		ENSOARG00000018851	5.5417	30.2138	15.2276	80.8386	62.4197	70.3991	3.93839e-09	1.97269	up		Ovis_aries_newGene_43075	0.0166935	0.182866	0.017905	0.326809	0.208312	0.4387	0.0218446	2.12967	up
ENSOARG00000020543	0.229097	0.138108	0.0661708	0.26158	0.705038	0.325319	0.0419895	1.46444	up		ENSOARG00000019048	0.0805001	0.0423621	0.125137	0.421861	0.196504	0.377531	0.0170658	1.87489	up		Ovis_aries_newGene_43364	0.108453	0.043201	0.139588	0.404416	0.58298	0.304011	0.0213311	2.10367	up
ENSOARG00000020549	0	0	0	0.128294	0.138391	0.177959	2.77004e-06	Inf	up		ENSOARG00000019084	0.125958	0.149139	0.20732	0.565788	0.599708	1.52458	0.0095346	2.34839	up		Ovis_aries_newGene_43407	0.295251	0.294025	0.791696	0.045874	0.18894	0.0431061	0.0451771	-2.37536	down
ENSOARG00000020726	0.128193	0	0.0714079	0.282283	0.153877	0.468089	0.0339428	2.12034	up		ENSOARG00000019090	1.11915	1.09593	1.15484	2.0472	3.64208	4.04417	0.000261704	1.38152	up		Ovis_aries_newGene_43870	0.088107	0.122838	0.415806	0.0164274	0.0169147	0.0154362	0.0309283	-3.71929	down
ENSOARG00000020743	0.110118	0.199148	0.125235	0.432661	0.496901	0.57856	0.0485366	1.67222	up		ENSOARG00000019101	2.97909	7.23691	4.56868	0.544874	1.27591	2.86829	0.00380752	-1.78188	down		Ovis_aries_newGene_45287	1.22575	0.219094	1.04503	0	0.211184	0.165192	0.0120325	-2.79599	down
ENSOARG00000020752	728.848	742.059	592.589	2672.77	2558.5	1421.62	0.000145748	1.58076	up		ENSOARG00000019118	14.7113	28.1942	25.354	6.24062	10.3943	9.70024	1.65791e-05	-1.50218	down		Ovis_aries_newGene_46734	0.0867622	0.259206	0.139588	0	0	0	0.0171279	#NAME?	down
ENSOARG00000020765	84.1124	144.509	152.381	46.3124	63.1415	73.1693	0.00311305	-1.1847	down		ENSOARG00000019123	0.0565204	0	0.0539147	0.317353	0.261414	0.164012	0.0164816	2.57967	up		Ovis_aries_newGene_47038	0.225648	0.674133	0.322699	0.0233731	0.144399	0.0658884	0.0129033	-2.45268	down
ENSOARG00000020773	0.712523	0.712842	0.384233	3.56016	3.87809	8.38275	0.000332133	3.02051	up		ENSOARG00000019129	4.93234	7.54876	11.4779	4.22906	4.02308	3.20206	0.0102101	-1.18409	down		Ovis_aries_newGene_4786	0	0.0181798	0.039161	0.323353	0.94627	0.063967	0.0327541	4.48293	up
ENSOARG00000020776	15.4693	25.0173	15.6444	5.7922	11.3726	8.7377	0.00345341	-1.24564	down		ENSOARG00000019135	0.177858	0.192793	0.149745	0.4951	0.440272	0.494304	0.00276249	1.31953	up		Ovis_aries_newGene_49496	0.0348762	0.0926172	0.112222	0.36848	0.446368	0.24441	0.00893368	2.10385	up
ENSOARG00000020789	11.7751	2.65294	4.40587	46.3011	54.5965	32.3265	2.67023e-11	2.74253	up		ENSOARG00000019143	3.10982	5.91051	7.91053	15.9314	15.5543	13.7786	4.60118e-08	1.30295	up		Ovis_aries_newGene_49530	0.129518	0.128981	0.293272	0.0134158	0.0138138	0	0.000853039	-4.37623	down
ENSOARG00000020795	0.623641	1.32796	1.03937	2.95499	2.19748	3.1195	0.00775684	1.34886	up		ENSOARG00000019163	9.31954	0.174231	0.0935777	18.177	20.8715	19.2541	2.49418e-06	2.36029	up		Ovis_aries_newGene_49566	0.40603	0.36391	0.130649	1.05985	0.974368	1.31601	0.0227438	1.85493	up
ENSOARG00000020808	0.887631	0.726716	1.16929	0.396974	0.375156	0.664285	0.0237904	-1.05894	down		ENSOARG00000019166	0.00419914	0.417642	0.00534073	1.74945	1.65569	0.469683	0.00183601	3.10904	up		Ovis_aries_newGene_49796	3.30523	7.89962	10.5467	16.4848	24.1917	22.8009	2.15168e-05	1.50197	up
ENSOARG00000020983	0.76477	0.355117	0.261934	1.48056	1.83324	0.933352	0.0198246	1.52709	up		ENSOARG00000019192	0.593515	0.868844	0.997342	0.31911	0.507424	0.466865	0.00734426	-1.06016	down		Ovis_aries_newGene_51011	0.642527	0.49989	0.107681	1.1231	2.69832	3.95752	0.00270169	2.58347	up
ENSOARG00000021051	0	0	0	0.0269079	0.0277063	0.0316055	0.0220089	Inf	up		ENSOARG00000019232	0.00703148	0.0124883	0	0.0513247	0.0609778	0.0259689	0.0272916	2.68424	up		Ovis_aries_newGene_51564	0.108097	0.107649	0.115942	0.604635	1.24515	0.757537	0.030461	2.92314	up
ENSOARG00000021052	1.75562	0.988459	0.64043	2.44283	2.47922	2.34718	0.00367494	1.00996	up		ENSOARG00000019246	0.0108182	0.192136	0.151352	3.1343	1.17583	1.44976	0.000260411	3.95303	up		Ovis_aries_newGene_51750	0.373947	0.558592	0.367662	0.0581013	0.0448688	0.191085	0.00829652	-2.18348	down
ENSOARG00000021053	0.0100887	0.0182454	0	0.118917	0.0376756	0.0859556	0.0310684	2.99139	up		ENSOARG00000019248	14.9487	39.4139	54.7645	9.6914	12.2242	3.21985	0.00464459	-2.23125	down		Ovis_aries_newGene_5188	0.407625	0.0716352	0.205745	0.0223532	0.0230163	0.0210044	0.0183189	-3.40923	down
ENSOARG00000021055	0.0664665	0.0300512	0	1.23545	0.0620539	0.509666	0.0464414	4.1787	up		ENSOARG00000019257	0.196907	0.655718	0.3287	0.912117	0.939179	2.59722	0.0473464	1.80257	up		Ovis_aries_newGene_5252	2.3377	1.92662	3.28551	0.526037	1.00591	0.282456	0.0072695	-2.10782	down
ENSOARG00000021057	0	0	0.00568353	0.824691	0.152413	0.447076	4.90578e-05	7.87788	up		ENSOARG00000019269	0.884262	0.697997	1.28533	2.2106	2.38573	2.64373	0.00276009	1.19672	up		Ovis_aries_newGene_52671	0.323938	0.250906	0.154421	0.0335541	0.0345496	0	0.0182638	-3.4599	down
ENSOARG00000021114	0.835899	0.278476	0.428865	0.245991	0.109531	0.212407	0.0286745	-1.5145	down		ENSOARG00000019272	0.982556	3.03662	1.44031	3.62805	6.26787	10.5086	0.0119246	1.78356	up		Ovis_aries_newGene_52969	6.32844	9.49938	9.40349	2.59008	2.54839	4.13746	2.07355e-05	-1.48236	down
ENSOARG00000021168	0.289213	0.22698	0.377676	0.118747	0.12227	0.0883356	0.0226421	-1.54628	down		ENSOARG00000019319	4.95087	3.30034	7.94929	2.84089	3.89141	1.76959	0.0425154	-1.07455	down		Ovis_aries_newGene_54146	0.0484136	0.0642835	0.0173091	0.240709	0.402758	0.438235	0.00183458	3.00753	up
ENSOARG00000021170	1.12811	43.5021	29.2128	0.428945	0.560583	0.558089	0.00227825	-5.72591	down		ENSOARG00000019334	0	0	0.122958	0.337754	0.0869436	0.30604	0.0152669	2.49314	up		Ovis_aries_newGene_55567	0.360428	0.25503	0.172946	1.46781	1.61151	0.540066	0.00265339	2.15708	up
ENSOARG00000025169	35.4082	70.2573	92.1797	35.6807	34.5459	34.5286	0.0454283	-1.03788	down		ENSOARG00000019361	0.0499909	0	0	2.61042	2.91908	0.0527508	0.00137006	6.55547	up		Ovis_aries_newGene_55788	4.00451	1.54133	1.94994	6.91665	4.29198	4.67004	0.0241195	1.05064	up
ENSOARG00000025184	23.9287	15.2688	12.2989	46.8959	28.206	40.0299	0.00333312	1.07227	up		ENSOARG00000019367	0.00676137	0.136097	0.171991	0.00759278	0.00781805	0.00713466	0.020961	-3.89295	down		Ovis_aries_newGene_55880	0.340595	0.135673	0.219188	0	0	0	0.0227949	#NAME?	down
Ovis_aries_newGene_10616	0.0410607	0.00412547	0.0222369	0.0579136	0.374829	0.155484	0.0283184	3.02359	up		ENSOARG00000019413	0.933211	0.37079	0.183215	1.25896	1.3977	2.76254	0.01938	1.67704	up		Ovis_aries_newGene_56005	0.53734	0.668887	0.514587	0.787175	1.78685	1.44574	0.0375542	1.17161	up
Ovis_aries_newGene_10768	0.017646	0.287215	0.292425	0.0159998	0.0164745	0.0150344	0.0171675	-3.79133	down		ENSOARG00000019427	41.9788	32.218	48.0525	25.8725	17.784	22.1903	0.000158943	-1.02937	down		Ovis_aries_newGene_58153	0	0.764541	0.365976	1.19284	1.55576	2.16702	0.00524891	2.07929	up
Ovis_aries_newGene_10817	0.317935	0.698197	0.0885503	0.0960916	0.0141346	0.0386973	0.0463301	-2.99108	down		ENSOARG00000019430	0.184324	0.328176	0.441084	0.105794	0.135772	0.237722	0.0278926	-1.1143	down		Ovis_aries_newGene_60328	0.0642057	0.0319696	0.0688655	0.389058	0.862833	0.478071	0.00180961	3.33688	up
Ovis_aries_newGene_10842	0.0202255	0.0182889	0.019716	0.605176	0.169945	0.137857	0.0320333	3.88781	up		ENSOARG00000019441	24.3874	64.4505	45.7451	26.3026	20.4897	18.7912	0.018021	-1.14534	down		Ovis_aries_newGene_60496	0	0	0	0.10314	0.212399	0.0323055	0.0411839	Inf	up
Ovis_aries_newGene_10844	0.018948	0.0171337	0.240119	1.39161	0.619151	2.76057	0.00178917	4.00639	up		ENSOARG00000019459	0.0235272	0.00928568	0.0398979	0.281816	0.163225	0.165508	0.00257798	2.93711	up		Ovis_aries_newGene_6077	0.121659	0.121154	0.0869924	0.718298	0.233561	1.13677	0.0150051	2.63366	up
Ovis_aries_newGene_11219	0.0137072	0.297474	0.0133619	0.347997	0.511888	0.630642	0.0126014	2.03363	up		ENSOARG00000019575	0.156076	0.251999	0.424083	3.72842	1.53398	6.75239	0.00124864	3.74227	up		Ovis_aries_newGene_60896	0.122694	0.226915	0.357196	0.01634	0.0168248	0.0921247	0.0189561	-2.53567	down
Ovis_aries_newGene_11277	3.09554	0.353739	1.67458	7.0092	4.57324	3.61557	0.0116671	1.50242	up		ENSOARG00000019628	0.336086	0.33576	0.227086	0.908151	0.86223	0.78686	0.0237739	1.36406	up		Ovis_aries_newGene_62859	0.183165	0.56748	0.196458	0	0.00651183	0.00594261	0.000125356	-6.31624	down
Ovis_aries_newGene_11417	0.599126	0.256623	0.184432	12.38	2.22268	9.85987	0.000432403	4.49132	up		ENSOARG00000019641	0.0271393	0	0	0.259051	0.0627615	0.114551	0.0178436	3.78425	up		Ovis_aries_newGene_63016	0.0236681	0.0235698	0.0253858	0.397158	0.454379	0.020733	0.0269563	3.54605	up
Ovis_aries_newGene_11547	0.218961	0.0742484	0.213445	0.0124084	0.0127765	0.0116597	0.00227765	-3.87321	down		ENSOARG00000019696	1.55828	0.698484	0.537948	1.74989	2.31661	2.54868	0.014133	1.06256	up		Ovis_aries_newGene_65385	0.161164	0.160496	0.0370416	0.354146	0.552505	0.252104	0.0314328	1.64196	up
Ovis_aries_newGene_11767	0.374652	0.162025	0.619278	0.664633	1.76411	1.45724	0.00818681	1.63589	up		ENSOARG00000019700	0.629196	0.440221	0.727501	1.28466	1.32278	1.3681	0.0342419	1.00062	up		Ovis_aries_newGene_67754	0.176557	0.101793	0.0797349	0.00866279	0.00891981	0.0081401	0.00173894	-3.84071	down
Ovis_aries_newGene_11908	0.489147	0.0589749	0.0158942	0.413947	0.822012	0.736266	0.0238975	1.73955	up		ENSOARG00000019715	0.0358528	0.0424509	0	0.265726	0.240445	0.393455	0.000144209	3.36876	up		Ovis_aries_newGene_67990	0.345006	0.171787	0.0462556	0.0201018	0.0206982	0.0188889	0.0317189	-3.28116	down
Ovis_aries_newGene_12157	0.818747	0.885205	0.459788	3.41327	1.97745	2.50975	5.77108e-05	1.76835	up		ENSOARG00000019726	8.26843	3.80726	5.25815	1.71947	2.65573	2.9487	0.0164154	-1.41417	down		Ovis_aries_newGene_68047	0.0557323	0.00792871	0.315965	0.319157	0.756605	0.467286	0.00626982	1.97425	up
Ovis_aries_newGene_12376	0.104301	0	0	0.283713	0.194754	0.488757	0.03926	3.17864	up		ENSOARG00000019729	0.271843	0.27359	0.795217	1.22108	1.29398	1.13306	0.00047653	1.32073	up		Ovis_aries_newGene_68079	0.0380712	0.530784	0.326674	0.0354914	0.0365444	0.03335	0.0464285	-3.12401	down
Ovis_aries_newGene_1373	0.373437	0.138142	0.198562	0.846499	0.903308	0.520641	0.0328357	1.58833	up		ENSOARG00000019750	0.313811	0.216182	0.355584	0.954681	0.659735	0.740541	0.00945462	1.27239	up		Ovis_aries_newGene_68486	2.41742	1.19281	2.52723	0.00407526	0.293732	0.0574405	7.27942e-10	-4.19185	down
Ovis_aries_newGene_14392	0.384985	0.0696246	0.0938218	1.11702	0.718852	1.21363	0.0013846	2.41238	up		ENSOARG00000019776	46.2811	44.923	33.8862	16.9387	18.7306	15.7141	1.59054e-08	-1.43027	down		Ovis_aries_newGene_69458	0.929042	0.558496	0.419245	0.195398	0.19032	0.302706	0.00630446	-1.51121	down
Ovis_aries_newGene_15289	0.0395541	0.0178834	0.0192789	0.179321	0.110785	0.202201	0.0464205	2.59979	up		ENSOARG00000019793	1.69312	1.59774	1.06861	7.34795	4.66616	8.51656	2.8048e-06	2.09427	up		Ovis_aries_newGene_69715	0.0838211	0.139122	0.0299681	0.156283	0.455938	0.48951	0.0470882	2.06746	up
Ovis_aries_newGene_15575	0.312217	0.147884	0.086958	0.0134805	0.0138805	0.0380014	0.00766354	-3.15198	down		ENSOARG00000019864	0.122406	0.231893	0.124547	4.70106	0.622759	3.35827	0.00349442	4.07965	up		Ovis_aries_newGene_70153	0.131021	0.0118616	0.229958	0.222078	0.697433	0.552998	0.0085795	1.92706	up
Ovis_aries_newGene_15820	0.0312423	0.0282509	0.0304553	0.708193	0.991718	0.18633	0.00132922	4.27504	up		ENSOARG00000019969	2.94301	3.13616	2.90091	1.54917	1.97797	1.28102	0.0152538	-1.04427	down		Ovis_aries_newGene_70434	0	0.0887853	0.363378	0.232719	0.77022	0.859091	0.0224816	1.99267	up
Ovis_aries_newGene_15839	6.4574	9.20687	13.8578	2.92125	3.52853	4.24653	0.00226901	-1.5832	down		ENSOARG00000019976	4.403	6.79843	4.03605	14.978	12.659	12.4628	5.7834e-07	1.26849	up		Ovis_aries_newGene_71421	0.0312213	0.621833	0.971127	0.0291057	0.0299692	0.0273495	0.019454	-4.26731	down
Ovis_aries_newGene_16483	0.789993	0.0974117	0.0350043	3.06054	2.84961	1.22377	0.000186483	2.89524	up		ENSOARG00000019982	0.0386582	0.00653895	0.0842879	0.161244	0.261813	0.18648	0.00906261	2.08569	up		Ovis_aries_newGene_71457	0.0557862	0.0555546	0.0598349	0.988115	0.910333	0.195473	0.00494646	3.57733	up
Ovis_aries_newGene_16816	1.51293	2.53278	1.63426	0.444906	1.04983	0.4529	0.00359048	-1.68017	down		ENSOARG00000019994	0.0150302	0.533888	0.152931	0.675137	1.1644	1.12606	0.00297182	1.98919	up		Ovis_aries_newGene_71458	2.14025	2.89063	4.66709	1.90384	1.07687	1.17356	0.0147494	-1.24955	down
Ovis_aries_newGene_17	0.0268818	0.0243079	0.0524092	0.414358	0.150583	0.183227	0.0316149	2.7613	up		ENSOARG00000020029	0.293198	0.104147	0.310756	0.471927	1.02271	0.670334	0.00412746	1.44286	up		Ovis_aries_newGene_71794	0	0	0	0.494141	0.203521	1.48584	0.0196708	Inf	up
Ovis_aries_newGene_17003	1.4325	0.495595	0.440587	1.92787	2.086	1.22689	0.0251685	1.0621	up		ENSOARG00000020052	3.542	7.11684	4.36843	0.361595	0.0620539	0.0566296	3.04449e-11	-5.05659	down		Ovis_aries_newGene_71863	0.0439791	0.0145988	0.0157236	0.0136663	0.39401	0.500828	0.0270412	3.54646	up
Ovis_aries_newGene_17709	0.180909	0.245381	0.11022	0.0410081	0.0211124	0.0385338	0.0451591	-2.51879	down		ENSOARG00000020095	0.0539488	0.149047	0.228718	0.726992	0.603007	0.531321	0.013275	2.00463	up		Ovis_aries_newGene_72088	4.2915	7.97077	16.3295	34.006	29.1301	20.8254	0.00045366	1.52174	up
Ovis_aries_newGene_18019	0.101714	0.165555	0.158643	1.70309	1.58269	0.46219	0.00104933	3.01979	up		ENSOARG00000020118	0.456711	0.424883	0.165964	1.5264	0.817277	1.20481	0.00403227	1.61632	up		Ovis_aries_newGene_72407	0.0131301	0	0.014083	0.0489615	0.126035	0.115018	0.0212581	3.36032	up
Ovis_aries_newGene_18159	2.42961	0.456971	1.21262	0.0881181	0.616981	0.215283	0.0363714	-2.26251	down		ENSOARG00000020147	0.589685	0.868501	0.658535	2.9395	2.68579	2.06402	2.63791e-06	1.73325	up		Ovis_aries_newGene_7351	0.124414	0	0.0333608	0.318954	0.417985	0.572172	0.00714295	3.00442	up
Ovis_aries_newGene_18227	0.329106	0.3151	0.0754861	0.280851	1.50014	1.13809	0.0370773	1.89361	up		ENSOARG00000020163	4.35002	0.383894	4.57043	0.0505686	0.0833102	0.0665244	0.000421117	-5.71219	down		Ovis_aries_newGene_7360	0.0916991	0.0152197	0.151629	0.309885	0.4071	0.415025	0.000100364	2.08812	up
Ovis_aries_newGene_18440	0.171961	0.0971852	0.16763	0	0.0200681	0.0183139	0.0166245	-3.63307	down		ENSOARG00000020193	0.556948	0.559351	0.531271	1.39047	1.49498	1.40627	0.00104384	1.23947	up		Ovis_aries_newGene_75273	0.68584	1.03677	0.529219	0.427778	0.317327	0.229078	0.00498646	-1.24177	down
Ovis_aries_newGene_18451	2.00642	1.83818	1.03456	0.598434	0.847876	0.845739	0.00155731	-1.20061	down		ENSOARG00000020290	0.978686	0.982031	0.759511	3.09219	2.58934	2.10044	0.000252451	1.37661	up		Ovis_aries_newGene_8234	0.0355372	0.00442371	0.0714681	0	0.00426401	0.00389128	0.0453507	-3.83774	down
Ovis_aries_newGene_18517	0.111019	0.0501947	0.0541114	0	0	0	0.0136214	#NAME?	down		ENSOARG00000020293	0.43569	0.484919	0.509806	0.988314	1.15869	1.03902	0.0411444	1.01724	up		Ovis_aries_newGene_9998	9.17322	12.3324	12.9932	4.82916	5.20552	7.25572	2.39881e-05	-1.03657	down
Ovis_aries_newGene_18628	0.257452	0.349203	0.313709	0.0194529	0.02003	0.146233	0.0224697	-2.42238	down		ENSOARG00000020380	2.28084	0.469667	0.567569	12.4724	20.7543	8.89454	1.9919e-06	3.4589	up
Ovis_aries_newGene_18810	0.950408	0.555034	0.0193014	0	0	0	0.00150292	#NAME?	down		ENSOARG00000020385	0.992695	0.083956	0.0901837	3.82204	1.96772	1.42161	0.0138479	2.41837	up
Ovis_aries_newGene_1908	0.0682393	0.0462791	0.0166301	2.69149	1.16269	1.7442	2.1415e-08	5.33386	up		ENSOARG00000020390	0.316463	0.192155	0.154807	0.0820102	0.0656781	0.0513746	0.0208868	-1.89504	down
Ovis_aries_newGene_19393	0	0	0	1.29413	0.249848	0.304011	0.0294599	Inf	up		ENSOARG00000020427	816.784	662.197	1105.99	140.087	304.949	35.1128	5.01828e-09	-2.58423	down
Ovis_aries_newGene_19407	0.0140597	0.0127135	0.0137055	0.101985	0.091884	0.407282	0.0340075	3.78827	up		ENSOARG00000020507	0.109286	0	0.0772203	0	0	0	0.0280915	#NAME?	down
Ovis_aries_newGene_19781	4.60486	3.80371	2.11308	1.08897	2.00737	1.07318	0.00162789	-1.44948	down		ENSOARG00000020525	0.548025	0.607811	0.388209	0.210331	0.336889	0.29646	0.0211786	-1.02168	down
Ovis_aries_newGene_20801	1.31955	0.901536	1.34349	3.7223	3.96962	5.52138	0.000441073	1.78806	up		ENSOARG00000020556	0.238366	0.132816	0.0535004	0.661319	0.502598	0.310708	0.0469321	1.62685	up
Ovis_aries_newGene_21343	0.0150057	0.0135689	0.0146277	0.190482	0.0980665	0.0894943	0.026983	3.03499	up		ENSOARG00000020655	0.0119729	0.0141763	0.0152279	0.255458	0.235349	0.0758034	0.00358016	3.64519	up
Ovis_aries_newGene_21524	0.0334299	0.060458	0.0325878	0.394046	0.124842	0.398753	0.0320876	2.75312	up		ENSOARG00000020657	0.347212	0.48626	0.755004	1.06491	1.70951	1.05187	0.00134487	1.13711	up
Ovis_aries_newGene_21733	0.02863	0	0	0.129796	0.240564	0.0243928	0.0483043	3.72983	up		ENSOARG00000020667	0.191124	0.386036	0.250232	0.984751	0.513483	0.480462	0.048698	1.14942	up
Ovis_aries_newGene_21887	0	0.0704649	0	0.494596	0.291011	0.464753	0.0281752	3.99008	up		ENSOARG00000020726	0.0295732	0.0875392	0.0188065	0.282283	0.153877	0.468089	0.0101828	2.62552	up
Ovis_aries_newGene_22729	0	0.181003	0.165108	0.397894	1.79693	0.544431	0.0365426	2.81446	up		ENSOARG00000020743	0.207461	0.0877288	0.0753891	0.432661	0.496901	0.57856	0.0253429	1.84599	up
Ovis_aries_newGene_22856	0.268498	0.182092	0.163584	0.0304313	0	0	0.0100434	-4.3847	down		ENSOARG00000020753	0.193049	0.253974	0.354657	2.02335	1.2153	1.15434	0.000643018	2.33788	up
Ovis_aries_newGene_23041	0.670075	0.891053	1.61378	0.250173	0.183997	0.268661	0.00904137	-2.28518	down		ENSOARG00000020768	3.77262	2.37943	3.26156	6.8809	9.08083	10.4596	4.91058e-06	1.33228	up
Ovis_aries_newGene_23309	0.711145	0.673675	0.627209	0.0307049	0.442622	0.0288522	0.0210351	-2.15355	down		ENSOARG00000020773	1.19958	1.01453	0.622735	3.56016	3.87809	8.38275	0.00246247	2.3245	up
Ovis_aries_newGene_24470	0.0788323	0	0.0768466	0.571825	0.183997	0.268661	0.0404467	2.65973	up		ENSOARG00000020776	15.1578	33.6644	44.812	5.7922	11.3726	8.7377	0.00203925	-1.97775	down
Ovis_aries_newGene_24745	0.14394	0.130158	0.187086	0	0.0223974	0.0204396	0.0199666	-3.56236	down		ENSOARG00000020789	9.21938	4.39674	16.4894	46.3011	54.5965	32.3265	3.13212e-07	2.00303	up
Ovis_aries_newGene_25809	0.962401	0.473804	0.302295	0.0775662	0.0798674	0.0546645	0.000799066	-3.12483	down		ENSOARG00000020795	3.39486	6.67373	5.6813	2.95499	2.19748	3.1195	0.00285913	-1.04414	down
Ovis_aries_newGene_26166	2.69658	2.9712	7.54134	1.43936	0.93195	0.283495	0.0116784	-2.41826	down		ENSOARG00000020860	0.416086	0.342357	0.475387	1.35424	0.595276	1.21299	0.0142121	1.22825	up
Ovis_aries_newGene_26314	0.210219	1.09302	0.461079	0.0476521	0.196263	0.0447769	0.0478154	-2.7784	down		ENSOARG00000020891	3.06602	3.1526	4.93715	12.403	10.7288	8.73149	2.96104e-07	1.38505	up
Ovis_aries_newGene_26318	0.159332	0.0360191	0.310637	0.794575	0.966903	1.35751	0.00578953	2.52568	up		ENSOARG00000020983	0.317092	0.671853	0.679237	1.48056	1.83324	0.933352	0.0329805	1.22831	up
Ovis_aries_newGene_27183	0.464355	0.755808	0.271595	7.99967	47.8614	23.9753	0.000239495	5.59644	up		ENSOARG00000021010	0.119346	0.0549538	0.0421644	0.29038	0.367994	0.279855	0.0105173	1.93683	up
Ovis_aries_newGene_27297	0.141832	0.149627	0.092173	0.535837	0.419318	0.745188	0.0238027	2.04305	up		ENSOARG00000021026	0.0599844	0.0608773	0.239775	0.356048	0.445879	0.397861	0.021852	1.61265	up
Ovis_aries_newGene_27305	1.7963	1.07123	1.78243	4.29364	4.49015	4.07023	9.0312e-07	1.36697	up		ENSOARG00000021053	0.00814584	0	0	0.118917	0.0376756	0.0859556	0.00551918	4.66704	up
Ovis_aries_newGene_27401	0.828551	1.52472	0.942293	0.296548	0.637835	0.346771	0.00379712	-1.49861	down		ENSOARG00000021055	0	0	0.0341283	1.23545	0.0620539	0.509666	0.0206384	5.66462	up
Ovis_aries_newGene_28031	0.313869	0.16556	0.305963	0.0237157	0.0244193	0.0222848	0.0064371	-3.577	down		ENSOARG00000021057	0	0	0.00598743	0.824691	0.152413	0.447076	4.94373e-05	7.82291	up
Ovis_aries_newGene_28626	0.779751	0.205117	0.152022	0.0128547	0.0397082	0.0483163	0.029517	-3.58149	down		ENSOARG00000021114	0.473632	0.280398	0.429206	0.245991	0.109531	0.212407	0.044912	-1.19914	down
Ovis_aries_newGene_29387	0.426926	0.540467	0.790726	0.296775	0.0132861	0.133372	0.00645556	-2.0687	down		ENSOARG00000021129	0	0	0	0.0326743	0.0785019	0.194451	0.0066508	Inf	up
Ovis_aries_newGene_29389	0.627351	9.32236	17.0826	2.10466	0.488086	0.766124	0.044647	-3.11639	down		ENSOARG00000021153	1.55946	2.04155	1.81876	4.40779	4.36845	5.67562	4.4164e-06	1.28293	up
Ovis_aries_newGene_29562	0.0306214	0.0276894	0.014925	0.0277648	0.271591	0.260895	0.0282249	2.80872	up		ENSOARG00000021170	6.71396	8.31484	5.53088	0.428945	0.560583	0.558089	1.42226e-23	-3.8735	down
Ovis_aries_newGene_30234	0.0100917	0.0091254	0.00983746	0.128103	0.197856	0.00859812	0.0390819	3.40687	up		Ovis_aries_newGene_1005	0.00906893	0.0859033	0.276826	0.570309	0.796954	0.679442	0.000281762	2.36117	up
Ovis_aries_newGene_31252	0.0349823	0.0105443	0.0341012	0.274897	0.108866	0.109285	0.0205592	2.55731	up		Ovis_aries_newGene_10625	0.0110141	0.0782463	0.0700421	0.185527	0.191031	0.26731	0.043827	1.91921	up
Ovis_aries_newGene_32337	0	0	0	0.455083	0.036045	0.164471	0.0411349	Inf	up		Ovis_aries_newGene_10670	0.371786	0.0906309	0.361599	0.0613975	0.101151	0.126924	0.047978	-1.67963	down
Ovis_aries_newGene_32952	0	0	0	0.0619669	0.255222	0.698736	0.040338	Inf	up		Ovis_aries_newGene_10817	0.574538	0.694746	0.155475	0.0960916	0.0141346	0.0386973	0.001359	-3.37699	down
Ovis_aries_newGene_34577	0.629548	5.79085	1.85165	0.00984169	0.0101337	0.0184957	0.00137681	-7.89484	down		Ovis_aries_newGene_11219	0.154946	0.0917303	0.225222	0.347997	0.511888	0.630642	0.0345848	1.511	up
Ovis_aries_newGene_34963	0.188846	0.626136	0.951128	0.142691	0.146924	0.107265	0.0247211	-2.28091	down		Ovis_aries_newGene_11277	0.837718	0.642287	2.36672	7.0092	4.57324	3.61557	0.00114577	1.86507	up
Ovis_aries_newGene_35769	0.130285	0.224911	0.161641	0.418829	0.906741	0.312828	0.0377312	1.52852	up		Ovis_aries_newGene_11901	0.186932	0.110667	0.138689	0.769702	0.576391	0.526007	0.0133719	1.95057	up
Ovis_aries_newGene_36191	0.71058	0.423494	0.283369	0.322145	0.105542	0.0550378	0.0402647	-1.62626	down		Ovis_aries_newGene_12157	1.58084	1.02096	0.849938	3.41327	1.97745	2.50975	0.0161329	1.04417	up
Ovis_aries_newGene_36530	0.0822764	0.0495991	0.0534693	0.149202	0.473688	0.175249	0.0382275	1.98805	up		Ovis_aries_newGene_12413	0.805579	1.20974	0.0999595	0.198579	0.0908757	0.124398	0.0399872	-2.48214	down
Ovis_aries_newGene_3669	0.178645	0.56539	0.239449	0.121485	0.0833925	0.0570772	0.042427	-2.03413	down		Ovis_aries_newGene_12558	0	0.0411779	0	0.390541	0.120638	0.183488	0.0259755	4.02433	up
Ovis_aries_newGene_37051	0	0.0638145	0	0	0.50513	0.561187	0.0294333	3.87111	up		Ovis_aries_newGene_12740	2.69634	2.09037	1.30643	6.11588	11.6173	7.11301	6.70699e-05	1.86008	up
Ovis_aries_newGene_3712	0.192915	0.049841	0.0537301	0.249883	0.849079	1.94889	0.0287036	3.27695	up		Ovis_aries_newGene_13086	0.809095	0.370837	0.475801	0.156316	0.130775	0.312129	0.0159525	-1.63096	down
Ovis_aries_newGene_37261	1.37123	0.377645	0.759945	2.54342	2.76184	2.38995	4.77981e-05	1.5326	up		Ovis_aries_newGene_13180	0.339473	0.552678	0.593674	0.0953042	0.196263	0	0.0320228	-2.48869	down
Ovis_aries_newGene_37343	0.105327	0.0158738	0.0171124	0.254671	0.852236	0.448696	0.000951008	3.40679	up		Ovis_aries_newGene_13301	0.0606538	0.394989	0.212144	0.0851401	0.0350665	0.0160006	0.0450944	-2.37006	down
Ovis_aries_newGene_3790	0.215322	0.185434	0.229889	0.576409	0.402055	0.987164	0.0190766	1.53948	up		Ovis_aries_newGene_14862	0.20066	0.229669	0.00850706	0.0375557	0.00773399	0.00705794	0.0269933	-3.19238	down
Ovis_aries_newGene_38048	0.0772802	0.11435	0.0616365	0.00637007	0.0131181	0.0299286	0.0257404	-2.48047	down		Ovis_aries_newGene_15194	1.28251	0.895319	1.98946	0.416246	0.805759	0.696213	0.0113718	-1.26856	down
Ovis_aries_newGene_3853	0.0208346	0.150718	0.0203098	0.510056	0.0778057	0.727796	0.040912	2.64648	up		Ovis_aries_newGene_15320	5.7699	4.6546	3.87087	4.58067	0.0977528	0.178416	0.0214868	-1.66041	down
Ovis_aries_newGene_38577	50.581	49.8181	54.8265	31.1609	32.3417	17.4987	0.00116471	-1.04804	down		Ovis_aries_newGene_15615	0.64077	0	0.465698	0	0.0352815	0	0.0193561	-5.20638	down
Ovis_aries_newGene_38630	0.0763466	0.414219	0.520964	0.96914	1.78195	1.75628	0.0335368	2.01517	up		Ovis_aries_newGene_15701	0.179224	0.0181892	0.0390768	0.212763	0.449992	0.199925	0.0446582	1.6439	up
Ovis_aries_newGene_39232	0.329972	0.1129	0.6694	1.69001	1.04909	2.30228	0.000526897	2.08854	up		Ovis_aries_newGene_15951	4.75307	4.66842	4.95792	2.02038	0.94426	4.54423	0.0107459	-1.0708	down
Ovis_aries_newGene_39323	0.769612	2.60444	0.295543	0.010573	0.0108866	0.0894151	0.0180887	-5.18442	down		Ovis_aries_newGene_16937	5.13249	3.74644	7.3352	3.19955	2.50927	2.39378	0.00441979	-1.13586	down
Ovis_aries_newGene_39563	5.40636	2.93323	4.21614	12.9413	10.2968	21.3269	0.00113711	1.73522	up		Ovis_aries_newGene_17	0	0.0770984	0	0.414358	0.150583	0.183227	0.0156661	3.22479	up
Ovis_aries_newGene_39564	0.0614371	0.0833318	0.0449171	0.473498	0.458867	0.143947	0.0119542	2.38934	up		Ovis_aries_newGene_17462	0.0456929	0.0541019	0.0968584	0	0	0	0.0183772	#NAME?	down
Ovis_aries_newGene_39710	0.016748	0.0454331	0.0163261	0.728907	0.422175	0.228309	0.000513607	4.01534	up		Ovis_aries_newGene_17570	52.1	56.9675	60.0283	119.615	132.197	145.94	1.44213e-06	1.09631	up
Ovis_aries_newGene_39824	0.071364	0.0161327	0.0347832	0.14559	0.266505	0.471218	0.00934345	2.76751	up		Ovis_aries_newGene_17577	0.284655	0.0612802	0.10971	0.0096866	0.00997399	0.0273064	0.0273534	-3.46797	down
Ovis_aries_newGene_40968	0.425719	1.05863	0.916449	0.386004	0.331214	0.0151131	0.0105443	-1.83615	down		Ovis_aries_newGene_17586	0.871443	0.571468	0.485971	0.255942	0.131768	0.311234	0.00311573	-1.61475	down
Ovis_aries_newGene_41083	6.52391	9.44678	5.88691	0.159873	2.22232	3.86834	0.000306397	-1.9384	down		Ovis_aries_newGene_17709	0.0365177	0.389144	0.441232	0.0410081	0.0211124	0.0385338	0.0221973	-3.18819	down
Ovis_aries_newGene_41211	0.0205069	0.0185434	0.0199903	0.371876	0.287182	0.139775	0.00407806	3.65641	up		Ovis_aries_newGene_18287	0.131798	0.260088	0.111753	1.23337	0.507985	0.649013	0.0365172	2.13782	up
Ovis_aries_newGene_41405	0.36523	0	0.333778	1.53161	1.08688	1.49754	0.00064378	2.48718	up		Ovis_aries_newGene_18451	1.2065	1.29729	1.9249	0.598434	0.847876	0.845739	0.00168409	-1.08741	down
Ovis_aries_newGene_4192	0.412634	0.0186563	0.020112	0.617331	0.924576	0.738287	0.00578488	2.28086	up		Ovis_aries_newGene_18605	4.76377	3.5552	4.73693	0.680852	1.30195	1.4928	2.94265e-05	-2.06512	down
Ovis_aries_newGene_4255	0.209246	0.630704	0.693517	1.16365	1.58889	2.13934	0.0043225	1.54238	up		Ovis_aries_newGene_1908	0.0275491	0.0489286	0.052558	2.69149	1.16269	1.7442	2.10435e-08	5.33294	up
Ovis_aries_newGene_42980	0.975947	0.647168	0.951363	0.235974	0.242975	0.0554339	0.025247	-2.37073	down		Ovis_aries_newGene_19119	0	0.029528	0	1.17621	0.028836	0.56578	0.011646	5.86703	up
Ovis_aries_newGene_43019	1.45386	5.12024	4.87331	1.38761	1.23828	1.62986	0.0335328	-1.55528	down		Ovis_aries_newGene_19149	0	0	0.0685254	0.0302516	0.373789	0.255836	0.0413067	3.14496	up
Ovis_aries_newGene_43075	0.171635	0.0465603	0.0167312	0.326809	0.208312	0.4387	0.0384968	1.98664	up		Ovis_aries_newGene_19393	0	0	0	1.29413	0.249848	0.304011	0.0292151	Inf	up
Ovis_aries_newGene_43178	0	0.041478	0	0.0831816	0.342598	0.234488	0.0406352	3.80464	up		Ovis_aries_newGene_19407	0.0113521	0.0134413	0.0288767	0.101985	0.091884	0.407282	0.0437379	3.36208	up
Ovis_aries_newGene_43870	0.181175	0.081914	0.176612	0.0164274	0.0169147	0.0154362	0.0165484	-3.2676	down		Ovis_aries_newGene_19558	0.0127838	0.0151364	0.0162592	0.387604	0.443449	0.148385	0.000153044	4.33541	up
Ovis_aries_newGene_44714	0.869651	1.00389	0.793634	2.24813	2.38393	3.43672	0.00304658	1.48513	up		Ovis_aries_newGene_19924	1.23996	1.41435	2.13853	0.145805	0.547976	0.78094	4.20306e-05	-1.8446	down
Ovis_aries_newGene_44802	0.0448979	0.040599	0.0437669	0.325675	0.125752	0.726809	0.0346452	3.0916	up		Ovis_aries_newGene_21024	0.363498	0.031881	0.11986	0.514024	0.731643	0.62507	0.0268093	1.65233	up
Ovis_aries_newGene_46150	0.289932	0.240324	0.0824334	0.788654	0.687989	0.679313	0.0132933	1.71603	up		Ovis_aries_newGene_21161	0.095839	0.198584	0.182841	0.538119	0.627963	0.404521	0.0138477	1.59834	up
Ovis_aries_newGene_47038	1.13423	0.559432	0.376928	0.0233731	0.144399	0.0658884	0.000625415	-3.2639	down		Ovis_aries_newGene_21841	0.328221	0	0.602987	0.0204767	0.0210843	0.0192412	0.0361507	-4.08758	down
Ovis_aries_newGene_48343	0.164154	0.0890621	0.0480058	0.491174	0.199233	0.643356	0.0182645	2.0676	up		Ovis_aries_newGene_21859	0.345	0.408492	0.0365661	0	0.132973	0	0.0443155	-2.77353	down
Ovis_aries_newGene_49566	0.459208	0.490738	0	1.05985	0.974368	1.31601	0.0468195	1.71256	up		Ovis_aries_newGene_22856	0.379386	0.0962585	0.206797	0.0304313	0	0	0.00460522	-4.61316	down
Ovis_aries_newGene_49796	10.4497	5.30076	8.53016	16.4848	24.1917	22.8009	0.00180262	1.28511	up		Ovis_aries_newGene_26284	0.13371	0.182304	0.10822	0.273003	0.51067	0.29501	0.0369715	1.20022	up
Ovis_aries_newGene_49885	0.304032	0.157098	0.172613	0.345344	0.679987	0.48676	0.0168724	1.15	up		Ovis_aries_newGene_26314	0.594078	0.15073	1.02544	0.0476521	0.196263	0.0447769	0.0288017	-2.78809	down
Ovis_aries_newGene_50500	0.728987	0.725106	0.852749	0.066098	0.272236	0.12422	0.0330132	-2.45044	down		Ovis_aries_newGene_26318	0.160811	0.304649	0.163624	0.794575	0.966903	1.35751	0.0101138	2.18197	up
Ovis_aries_newGene_51186	0.323865	0.976185	0.894504	0.048942	0.0503941	0.229945	0.0101302	-2.86339	down		Ovis_aries_newGene_26415	0.681038	0.654226	0.555667	0.173158	0.393736	0.271184	0.0125431	-1.33128	down
Ovis_aries_newGene_51402	0.834056	0.221416	0.716078	0.104071	0.200029	0.00651943	0.00225302	-2.61616	down		Ovis_aries_newGene_26482	0.134994	0.0399593	0.0429234	0.644273	0.351205	0.498564	0.023704	2.60109	up
Ovis_aries_newGene_5292	0.249249	2.8173	2.55119	0.112998	0.232702	0	0.00545232	-4.18032	down		Ovis_aries_newGene_27183	0.374932	3.2851	1.0491	7.99967	47.8614	23.9753	0.00320006	3.96578	up
Ovis_aries_newGene_53	0.398799	0.408696	0.285086	0.0120532	0.0744646	0.260496	0.0377473	-1.77065	down		Ovis_aries_newGene_27297	0.0190865	0.180792	0.0728262	0.535837	0.419318	0.745188	0.00442512	2.55229	up
Ovis_aries_newGene_54146	0.0829611	0.0450106	0.0646971	0.240709	0.402758	0.438235	0.0124912	2.38569	up		Ovis_aries_newGene_27305	1.41399	1.82809	2.09593	4.29364	4.49015	4.07023	1.96445e-06	1.138	up
Ovis_aries_newGene_54659	0.0152556	0.124154	0.0892278	0.567128	0.227885	0.285951	0.0214407	2.11779	up		Ovis_aries_newGene_27309	0.148999	0.379982	0.364436	0.540576	1.12648	1.02801	0.0139038	1.46954	up
Ovis_aries_newGene_54953	0.28906	0.0703724	0.162565	0.675397	0.290629	0.53045	0.0466975	1.45131	up		Ovis_aries_newGene_27525	0.214063	0.00396029	0.0127622	0.259166	0.502771	0.303528	0.0102788	1.95994	up
Ovis_aries_newGene_5512	0.0185946	0	0	0.168599	0.208321	0.221797	0.00169416	4.96578	up		Ovis_aries_newGene_28031	0.443496	0.525114	0.590926	0.0237157	0.0244193	0.0222848	4.86645e-05	-4.60172	down
Ovis_aries_newGene_55567	0.380327	0.14991	0.351734	1.46781	1.61151	0.540066	0.00483632	1.94165	up		Ovis_aries_newGene_28626	0.240389	0.121984	0.276624	0.0128547	0.0397082	0.0483163	0.00637883	-2.82721	down
Ovis_aries_newGene_56463	0.0156572	0	0	0.099376	0.0292355	0.08004	0.0485664	3.71371	up		Ovis_aries_newGene_29387	0.723892	0.897928	0.555338	0.296775	0.0132861	0.133372	0.00036411	-2.40103	down
Ovis_aries_newGene_57164	2.13327	0.61474	2.42231	0.233812	0.218862	0.858843	0.0167966	-2.06821	down		Ovis_aries_newGene_29389	6.80452	1.57937	14.1735	2.10466	0.488086	0.766124	0.0343581	-2.86344	down
Ovis_aries_newGene_57296	10.8774	3.62024	8.43677	18.8044	20.7639	12.7037	0.00261548	1.09761	up		Ovis_aries_newGene_29459	0	0.0212227	0	0.10064	0.165802	0.0945681	0.026189	4.00715	up
Ovis_aries_newGene_59699	0.0690385	0.0312141	0	0.125196	0.515641	0.705851	0.00559885	3.65259	up		Ovis_aries_newGene_29488	0.00486232	0.0345429	0.0494737	0.24571	0.163044	0.138531	0.00225281	2.53541	up
Ovis_aries_newGene_60328	0.0330067	0.238771	0.0643506	0.389058	0.862833	0.478071	0.0289011	2.20358	up		Ovis_aries_newGene_29627	1.15374	1.52105	0.801452	0.143576	1.20029	0.150974	0.0385242	-1.39078	down
Ovis_aries_newGene_60477	0.014822	0.0134028	0.202281	1.26329	1.70207	0.0126284	0.0264297	3.56886	up		Ovis_aries_newGene_29633	0.00626316	0.00741579	0.00796588	0.478266	0.709714	0.00660894	0.00467796	5.6448	up
Ovis_aries_newGene_61290	0.391288	0.521423	0.0200753	0.0186729	0.0192269	0.0175462	0.0169754	-4.18729	down		Ovis_aries_newGene_30234	0.00814827	0.00964782	0.0103635	0.128103	0.197856	0.00859812	0.0383185	3.42816	up
Ovis_aries_newGene_62378	2.31889	3.71715	3.67841	1.05128	1.31864	0.4131	9.84082e-05	-1.92736	down		Ovis_aries_newGene_30365	0.178949	0.26621	0.0875379	0.118511	0.0318332	0.0145253	0.0181372	-1.80081	down
Ovis_aries_newGene_62617	0.045623	0.206273	0.133421	0	0	0	0.0314513	#NAME?	down		Ovis_aries_newGene_30891	0.137381	0.0073938	0.00794226	0.0841495	0.440451	0.316288	0.0428063	2.20828	up
Ovis_aries_newGene_62859	0.00697488	0.971284	0.190377	0	0.00651183	0.00594261	0.0418996	-6.73714	down		Ovis_aries_newGene_31252	0.0470761	0.0111479	0.0239497	0.274897	0.108866	0.109285	0.0236921	2.42202	up
Ovis_aries_newGene_63240	0.132082	0.673956	0.671365	0.128314	0.0616566	0.0401908	0.00835008	-2.80112	down		Ovis_aries_newGene_32337	0	0	0	0.455083	0.036045	0.164471	0.0408291	Inf	up
Ovis_aries_newGene_64015	0.0256673	0.216623	0.208506	0.038788	0.00798775	0.00728952	0.0152774	-3.16808	down		Ovis_aries_newGene_32664	0.245398	0.581118	0.395342	0.128601	0.0567498	0.0517892	0.00670692	-2.46543	down
Ovis_aries_newGene_6556	0.352797	0.0265848	0.143296	0.90634	0.603855	1.35263	0.00517338	2.39182	up		Ovis_aries_newGene_33543	0.842855	0.876594	1.10097	0.217439	0.513629	0.336525	0.00811344	-1.55092	down
Ovis_aries_newGene_68479	0.028414	0.0513868	0.0276983	0.386449	0.132638	0.459967	0.0124915	3.07952	up		Ovis_aries_newGene_33910	0.981884	1.13616	0.49669	0.0751788	0.0129015	0.141285	3.55505e-07	-3.64238	down
Ovis_aries_newGene_68486	0.561819	0.51209	0.271643	0.00407526	0.293732	0.0574405	0.00153793	-2.06949	down		Ovis_aries_newGene_34083	0.0108525	0.0128497	0.0138029	0.292488	0.276068	0.526776	1.19687e-05	4.73537	up
Ovis_aries_newGene_69254	1.9651	3.75799	2.89928	0.927004	1.67349	1.24439	0.00378455	-1.297	down		Ovis_aries_newGene_34577	0.385617	0.560352	0.902876	0.00984169	0.0101337	0.0184957	3.70957e-10	-5.70895	down
Ovis_aries_newGene_69351	0.473209	0.636631	0.810068	0.115115	0.183183	0.186837	0.00301707	-2.10648	down		Ovis_aries_newGene_34588	0.0732472	0.0578181	0.0621069	0.150799	0.282315	0.450864	0.0254569	2.03798	up
Ovis_aries_newGene_69448	14.1052	4.70869	11.8032	4.53814	3.65799	4.65199	0.0174291	-1.33855	down		Ovis_aries_newGene_35769	0.114759	0.226464	0.158121	0.418829	0.906741	0.312828	0.0328351	1.57819	up
Ovis_aries_newGene_69715	0	0.0779294	0.140017	0.156283	0.455938	0.48951	0.0431999	2.18989	up		Ovis_aries_newGene_36316	0.391	0.316354	0.306667	1.3831	2.26053	0.777039	0.00421066	1.96616	up
Ovis_aries_newGene_70153	0.26942	0.121812	0.0596893	0.222078	0.697433	0.552998	0.0350791	1.6053	up		Ovis_aries_newGene_3633	1.37753	1.06954	0.258497	0.177516	0.235006	0.381268	0.0448883	-1.93887	down
Ovis_aries_newGene_70434	0.0183331	0	0.125099	0.232719	0.77022	0.859091	0.00038704	3.57821	up		Ovis_aries_newGene_36455	0.00449869	0.186431	0.080104	0.00505187	0.00520175	0.00474706	0.0423362	-4.25791	down
Ovis_aries_newGene_70472	0.743841	0.3569	0.562325	0.0963498	0.141726	0.0388013	0.00120382	-2.6895	down		Ovis_aries_newGene_36584	0.13335	0.0789452	0.106002	0.598988	0.46257	2.12827	0.0355749	3.17091	up
Ovis_aries_newGene_70643	0.0444854	0.040226	0	0.0806708	0.332257	0.379017	0.0460521	3.10694	up		Ovis_aries_newGene_36810	0.0164286	0.019452	0.0208949	0.202936	0.322933	0.0866779	0.0119326	3.28925	up
Ovis_aries_newGene_70887	59.5967	51.5666	92.4517	2.99589	33.4755	24.9886	0.000435268	-1.86083	down		Ovis_aries_newGene_37051	0	0	0.0241575	0	0.50513	0.561187	0.0104044	5.34337	up
Ovis_aries_newGene_70994	126.061	91.0753	221.807	8.44492	47.9262	44.5673	0.00173112	-2.24559	down		Ovis_aries_newGene_37261	0.89922	0.911655	1.01502	2.54342	2.76184	2.38995	7.10712e-05	1.30606	up
Ovis_aries_newGene_71421	0.224702	0.0870802	0.56325	0.0291057	0.0299692	0.0273495	0.0383931	-3.44206	down		Ovis_aries_newGene_37427	0	0.126196	0.108445	0.574497	0.345066	0.134958	0.0456474	2.09717	up
Ovis_aries_newGene_71457	0.0573568	0.051865	0.0559121	0.988115	0.910333	0.195473	0.00580343	3.55892	up		Ovis_aries_newGene_375	0.575143	0.801162	0.172118	0.227952	0.176037	0.124949	0.0377376	-1.6859	down
Ovis_aries_newGene_71794	0	0	0	0.494141	0.203521	1.48584	0.0205515	Inf	up		Ovis_aries_newGene_3790	0.157299	0.107827	0.115826	0.576409	0.402055	0.987164	0.0013298	2.21792	up
Ovis_aries_newGene_72407	0	0	0.0263194	0.0489615	0.126035	0.115018	0.0249027	3.3332	up		Ovis_aries_newGene_37996	0.0505915	0.13478	0.0482591	0.312469	0.541107	0.653962	0.00192388	2.56532	up
Ovis_aries_newGene_73	0.224986	0.0339073	0.0365531	1.01999	0.490116	0.575066	0.00789267	2.76739	up		Ovis_aries_newGene_38037	0.0564829	0.0859856	0.0102626	0.235591	0.951663	0.238405	0.0375569	3.05673	up
Ovis_aries_newGene_73294	0.089677	0.0202726	0.043709	0.284589	0.25117	0.30562	0.0337413	2.3762	up		Ovis_aries_newGene_3853	0.117757	0.0398365	0.0641873	0.510056	0.0778057	0.727796	0.0480045	2.41108	up
Ovis_aries_newGene_7360	0.0196418	0.046179	0.00382941	0.309885	0.4071	0.415025	5.60221e-08	3.88843	up		Ovis_aries_newGene_3919	0.174671	0.00574491	0.240671	0.0108972	0.0504923	0	0.0463819	-2.96965	down
Ovis_aries_newGene_9496	1.35592	4.90436	5.85351	0.526896	0.632949	0.907691	0.00585715	-2.68148	down		Ovis_aries_newGene_39293	0.860127	0.0152003	0.947013	1.83087	2.90943	2.76348	4.14676e-05	1.86604	up
											Ovis_aries_newGene_39305	0	0.469667	0.168169	1.63329	1.0702	1.95331	0.0246918	2.79563	up
											Ovis_aries_newGene_39323	0.23538	3.41127	2.65842	0.010573	0.0108866	0.0894151	0.000476185	-5.92043	down
											Ovis_aries_newGene_39564	0.0620073	0.132154	0.0946377	0.473498	0.458867	0.143947	0.03763	1.78077	up
											Ovis_aries_newGene_39710	0.0135227	0.0160114	0.0171991	0.728907	0.422175	0.228309	0.000160949	4.76261	up
											Ovis_aries_newGene_39716	0.602485	0.122291	0.437873	0.0579917	0.0199041	0.0181642	0.00355777	-3.74957	down
											Ovis_aries_newGene_39824	0	0.0170563	0.0183215	0.14559	0.266505	0.471218	0.000272334	4.54992	up
											Ovis_aries_newGene_40440	0.355224	0.273388	0.135539	0.0199452	0.020537	0.0374836	0.00345927	-3.45348	down
											Ovis_aries_newGene_41048	2.6775	3.13823	2.37347	7.19796	4.00284	8.21912	0.00864422	1.11598	up
											Ovis_aries_newGene_41083	12.5283	4.76202	8.96302	0.159873	2.22232	3.86834	0.00484801	-2.25399	down
											Ovis_aries_newGene_41405	0.423913	0.589219	0.0234417	1.53161	1.08688	1.49754	0.00471132	1.8485	up
											Ovis_aries_newGene_4192	0.0166586	0.13807	0.296624	0.617331	0.924576	0.738287	0.00297953	2.2358	up
											Ovis_aries_newGene_42287	0	0	0.0301916	0.159942	0.274479	0.0500973	0.0258777	3.89784	up
											Ovis_aries_newGene_4255	0.247794	0.360078	0.100278	1.16365	1.58889	2.13934	1.55699e-06	2.64475	up
											Ovis_aries_newGene_42758	0.0825891	0.215134	0.168067	0.667762	1.16505	0.331165	0.0118763	2.09205	up
											Ovis_aries_newGene_42894	0.0495834	0	0	0.631045	0.0382216	0.436007	0.0165638	4.25942	up
											Ovis_aries_newGene_42911	0	0	0	0.123752	0.011584	0.0634284	0.020705	Inf	up
											Ovis_aries_newGene_42913	0.0515929	0.346164	0.0874921	0.57937	0.556789	0.28128	0.0348573	1.45204	up
											Ovis_aries_newGene_43019	3.3569	3.21876	7.30793	1.38761	1.23828	1.62986	0.00572277	-1.83231	down
											Ovis_aries_newGene_43870	0.160914	0.24249	0.725615	0.0164274	0.0169147	0.0154362	0.00595683	-4.64602	down
											Ovis_aries_newGene_447	0.268243	0.613313	0.423519	0.0103872	0.0213907	0.351375	0.0159821	-1.88908	down
											Ovis_aries_newGene_44714	1.82268	0.972918	0.551046	2.24813	2.38393	3.43672	0.017794	1.09533	up
											Ovis_aries_newGene_45142	0.43792	0.103702	0.278487	0.0163923	0.118151	0.061613	0.0322509	-2.26569	down
											Ovis_aries_newGene_46150	0.107295	0.485066	0.111653	0.788654	0.687989	0.679313	0.015931	1.51343	up
											Ovis_aries_newGene_47225	3.15808	2.58518	1.88435	5.16638	8.34015	7.07628	0.00511165	1.27195	up
											Ovis_aries_newGene_47282	1.19128	0.793332	0.198888	3.29623	2.93823	1.14704	0.0295049	1.58889	up
											Ovis_aries_newGene_4786	0	0.0358882	0.0192751	0.323353	0.94627	0.063967	0.0327769	4.49214	up
											Ovis_aries_newGene_48780	0.335454	0.288865	0.387865	0.0171229	0.0176309	0.241346	0.0302102	-2.01726	down
											Ovis_aries_newGene_49017	0.0267547	0.0316784	1.36113	2.10312	1.29931	3.47251	0.00998737	2.18346	up
											Ovis_aries_newGene_49530	0.0597338	0.18389	0.0607785	0.0134158	0.0138138	0	0.0136211	-3.59462	down
											Ovis_aries_newGene_49566	0	0.0798202	0.0857411	1.05985	0.974368	1.31601	3.48046e-05	4.25571	up
											Ovis_aries_newGene_49796	5.9679	10.8836	3.66431	16.4848	24.1917	22.8009	8.52239e-05	1.49417	up
											Ovis_aries_newGene_50209	0.0279001	0.165173	0.124198	0.454298	0.403255	0.603529	0.00965122	2.10739	up
											Ovis_aries_newGene_51223	0.247071	0.292541	0.314241	0.123312	0.0317427	0.028968	0.0486086	-2.32092	down
											Ovis_aries_newGene_51239	0.181019	0.450098	0.138139	0.0406555	0.0627926	0.0191012	0.0125852	-2.77776	down
											Ovis_aries_newGene_51409	2.86764	3.91412	2.5632	0.196794	0.00921056	2.06774	0.000151794	-2.17122	down
											Ovis_aries_newGene_51851	0.154499	0.0140717	0.0151155	0.133459	0.398514	0.689735	0.0330614	2.49987	up
											Ovis_aries_newGene_52819	0.767384	0.353348	0.379558	0.191499	0.0492951	0.0449861	0.0246729	-2.53541	down
											Ovis_aries_newGene_53560	0.0180066	0.383767	0.274823	0.343753	1.7073	1.53906	0.0139412	2.30109	up
											Ovis_aries_newGene_54146	0.0401909	0.0317249	0.0511173	0.240709	0.402758	0.438235	0.0020285	2.98758	up
											Ovis_aries_newGene_5512	0.0150137	0.0888838	0	0.168599	0.208321	0.221797	0.0372843	2.42449	up
											Ovis_aries_newGene_56463	0.012642	0	0	0.099376	0.0292355	0.08004	0.0461612	3.81571	up
											Ovis_aries_newGene_56675	0.246392	0.405189	0.313376	0.807011	1.03671	0.751096	0.0105715	1.29681	up
											Ovis_aries_newGene_59196	0.903964	1.9028	0.319366	0.0563956	0	0	0.00112138	-5.86769	down
											Ovis_aries_newGene_59590	0.0957831	0.0850578	0	0.0806708	0.609138	0.555891	0.030011	2.59479	up
											Ovis_aries_newGene_59627	0.138116	0.19079	0.165906	0.637632	1.06468	0.210515	0.0457548	1.80978	up
											Ovis_aries_newGene_60258	0.263173	0.638792	0.301248	0.0591069	0.0760757	0.166622	0.0117822	-2.11673	down
											Ovis_aries_newGene_60328	0.0266505	0.031555	0.0677914	0.389058	0.862833	0.478071	0.00107649	3.64247	up
											Ovis_aries_newGene_60604	2.10969	1.68004	0	0.0419312	0	0	0.00193173	-6.61758	down
											Ovis_aries_newGene_62378	2.8936	3.10366	2.53288	1.05128	1.31864	0.4131	0.000107427	-1.76025	down
											Ovis_aries_newGene_62617	0.331535	0.305315	0.0468518	0	0	0	0.00407464	#NAME?	down
											Ovis_aries_newGene_62663	0.00641585	0.0455795	0.00816008	0.338625	0.311578	0.0135401	0.0273288	3.37238	up
											Ovis_aries_newGene_62859	0.309743	0.273393	0.243533	0	0.00651183	0.00594261	5.02728e-09	-6.2267	down
											Ovis_aries_newGene_63240	1.14264	0.0901949	1.27889	0.128314	0.0616566	0.0401908	0.0101109	-3.59751	down
											Ovis_aries_newGene_64916	0.113923	0.185472	0.0181118	0.0159915	0.0164659	0.0150266	0.0385786	-2.88001	down
											Ovis_aries_newGene_6556	0.403548	0.112427	0	0.90634	0.603855	1.35263	0.00575802	2.26698	up
											Ovis_aries_newGene_6564	0.0333171	0.0394486	0.0423748	0.130949	0.404502	0.544926	0.00320549	3.08333	up
											Ovis_aries_newGene_65674	0.0279001	0.0165173	0.0532277	0.0939926	0.258083	0.235524	0.0298287	2.43826	up
											Ovis_aries_newGene_65703	0	0.024814	0.0266546	0.0941366	0.121162	0.375941	0.0297314	3.43418	up
											Ovis_aries_newGene_66928	0.0443359	0.240603	0.225557	0.307024	0.410118	0.623782	0.0124114	1.29047	up
											Ovis_aries_newGene_66935	0.0672895	0.368488	0.181864	0.557283	1.10873	0.381649	0.0336859	1.61691	up
											Ovis_aries_newGene_67990	0.0179006	0.317924	0.227671	0.0201018	0.0206982	0.0188889	0.03421	-3.32669	down
											Ovis_aries_newGene_68099	0.541689	0.835115	0.765217	0.309285	0.401895	0.268103	9.83471e-06	-1.26001	down
											Ovis_aries_newGene_68486	1.05967	1.0957	1.02005	0.00407526	0.293732	0.0574405	1.31269e-14	-3.34162	down
											Ovis_aries_newGene_68931	0	0.0485862	0	0.230402	0.427027	0.1732	0.0261326	4.01168	up
											Ovis_aries_newGene_69697	2.00268	2.28342	0.566031	0.832943	0.0857655	0.313074	0.0191794	-2.09575	down
											Ovis_aries_newGene_70153	0.138432	0.117077	0.125762	0.222078	0.697433	0.552998	0.0132235	1.78741	up
											Ovis_aries_newGene_70334	0.151662	0.293303	0.00642979	0.00567706	0.00584549	0.00533452	0.012872	-4.87671	down
											Ovis_aries_newGene_70434	0.0888156	0.227848	0	0.232719	0.77022	0.859091	0.00688274	2.41726	up
											Ovis_aries_newGene_70472	0.232884	0.478921	0.265018	0.0963498	0.141726	0.0388013	0.0213644	-1.9482	down
											Ovis_aries_newGene_70722	4.42897	5.83326	1.39244	0.950009	2.87704	0.0525111	0.04485	-1.75478	down
											Ovis_aries_newGene_70957	0.167914	0.728992	0.498316	0.062854	0.0647188	0.0590615	0.0316354	-3.00507	down
											Ovis_aries_newGene_71421	0.0259186	0.491015	1.12081	0.0291057	0.0299692	0.0273495	0.0436727	-4.33547	down
											Ovis_aries_newGene_71794	0	0	0.111932	0.494141	0.203521	1.48584	0.0446569	4.19609	up
											Ovis_aries_newGene_72087	0.321161	0.25351	0.499244	1.0686	1.0728	1.84508	0.00127742	1.75485	up
											Ovis_aries_newGene_72156	15.2573	6.37108	6.7548	1.85721	2.42406	1.74515	0.00752454	-2.41375	down
											Ovis_aries_newGene_72280	1.81125	1.57477	0.0111288	0.127737	0.0101175	0.0369323	0.00925518	-4.4135	down
											Ovis_aries_newGene_72856	0.853592	1.36931	0.6654	0.27829	0.350224	0.406776	0.033981	-1.61497	down
											Ovis_aries_newGene_73	0.0302766	0.0358485	0.0385076	1.01999	0.490116	0.575066	0.000310155	4.19709	up
											Ovis_aries_newGene_73037	0.245148	0.409783	0.550225	0.0161937	0.0166741	0.167382	0.0034191	-2.71117	down
											Ovis_aries_newGene_73260	0.182308	0.300326	0.0806508	0.943519	0.494921	0.878226	0.00128273	1.91587	up
											Ovis_aries_newGene_7351	0.103283	0.0305727	0.131362	0.318954	0.417985	0.572172	0.0367573	2.14566	up
											Ovis_aries_newGene_75115	0.140753	0.0454516	0.0162744	0.66098	0.266318	0.216034	0.0412072	2.31869	up
											Ovis_aries_newGene_75647	0.00829143	0.00981733	0.0316367	0.037244	0.354728	0.21873	0.014618	3.47365	up
											Ovis_aries_newGene_8485	0.390164	1.84787	0.918035	1.74161	3.56401	2.01735	0.0485511	1.10018	up
											Ovis_aries_newGene_8703	1.10282	0.118707	0.51005	0	0	0	0.020871	#NAME?	down
											Ovis_aries_newGene_9880	0.904953	0.832118	0.477533	0.583792	0.244898	0.284443	0.0405077	-1.12707	down
											Ovis_aries_newGene_9995	1.3685	1.32574	1.58231	7.82361	4.67519	3.80705	0.00302623	1.8028	up

## Sheet: DE mRNA lung
Supplementary Table S6B.
#ID	L16	L17	L18	L28	L29	L30	FDR	log2FC	regulated		#ID	L19	L20	L28	L29	L30	FDR	log2FC	regulated		#ID	L22	L23	L24	L28	L29	L30	FDR	log2FC	regulated		#ID	L25	L26	L27	L28	L29	L30	FDR	log2FC	regulated
ENSOARG00000000054	0	0	0.312369	25.3523	26.2409	27.9796	3.04793e-23	7.95117	up		ENSOARG00000000054	10.4405	0	25.3523	26.2409	27.9796	0.000507205	2.32808	up		ENSOARG00000000054	1.03336	1.20291	0.163791	25.3523	26.2409	27.9796	3.48829e-12	5.09347	up		ENSOARG00000000054	0	0.608401	0	25.3523	26.2409	27.9796	4.27534e-18	7.02373	up
ENSOARG00000000058	14.8947	88.6787	13.4542	0	0	0	0.000948606	#NAME?	down		ENSOARG00000000165	9.37947	14.6092	1.14063	2.24173	2.84445	0.00016151	-2.5411	down		ENSOARG00000000058	172.909	21.4314	18.1106	0	0	0	0.00184075	#NAME?	down		ENSOARG00000000081	0	0.271314	0.291455	0	0	0.0259585	0.0417519	-4.45083	down
ENSOARG00000000165	5.78289	4.02674	4.98063	1.14063	2.24173	2.84445	0.0381338	-1.29414	down		ENSOARG00000000235	5.59114	0.0804082	26.0692	10.615	14.6653	0.00606879	2.58283	up		ENSOARG00000000119	17.5785	19.035	18.521	9.31427	8.19058	8.4315	0.00270353	-1.06911	down		ENSOARG00000000158	12.0711	11.1038	15.9211	28.8675	39.4728	15.9785	0.0360559	1.11577	up
ENSOARG00000000222	3.37476	0.0570883	2.86031	0	0	0.108149	0.00338884	-5.9204	down		ENSOARG00000000378	4.81806	4.13259	0.903508	0.463438	2.32008	0.0461602	-1.87764	down		ENSOARG00000000228	0.799418	0.930579	0.337299	0.163542	0.102637	0.300423	0.0314537	-1.83754	down		ENSOARG00000000209	0.166426	0.164209	0.0493916	0	0	0	0.0307142	#NAME?	down
ENSOARG00000000228	1.17452	0.349978	0.714742	0.163542	0.102637	0.300423	0.0153232	-2.02845	down		ENSOARG00000000585	0.329562	0.331242	0.0176952	0.117994	0.0381101	0.0417303	-2.52411	down		ENSOARG00000000235	1.28199	0.646676	0	26.0692	10.615	14.6653	3.39612e-07	4.79247	up		ENSOARG00000000235	0.148746	0.117411	0.0882887	26.0692	10.615	14.6653	1.28095e-10	7.18744	up
ENSOARG00000000235	0	0.0830173	0.406901	26.0692	10.615	14.6653	2.75035e-10	6.67572	up		ENSOARG00000000647	2.4626	1.96345	6.2524	3.40882	5.85109	0.00573388	1.21791	up		ENSOARG00000000392	0.00491526	0.686605	0.567173	0.00419964	0.00560075	0.00452237	0.00152221	-6.45638	down		ENSOARG00000000330	0.188911	0.127813	0.264304	1.0334	0.662582	1.30542	0.0120251	2.37451	up
ENSOARG00000000330	0.0667791	0.135558	0.812075	1.0334	0.662582	1.30542	0.0379779	1.52343	up		ENSOARG00000000671	10.6731	14.248	28.3218	24.6173	31.2778	0.0217777	1.16594	up		ENSOARG00000000393	0.67429	0.428138	0.374069	0.117842	0.209543	0.0422994	0.0430516	-1.96549	down		ENSOARG00000000392	0.0684363	0.0472671	0.350354	0.00419964	0.00560075	0.00452237	0.0318992	-5.01606	down
ENSOARG00000000392	0.493918	0.868946	1.34168	0.00419964	0.00560075	0.00452237	9.67703e-11	-7.60185	down		ENSOARG00000000715	0.221487	0.157141	0	0	0	0.0315225	#NAME?	down		ENSOARG00000000583	9.79898	9.42202	9.61768	3.69548	6.11447	3.31897	0.00108858	-1.11541	down		ENSOARG00000000464	1.05444	2.49694	2.5452	6.2636	3.47478	3.23311	0.0320924	1.09698	up
ENSOARG00000000407	0	0	0	0.239749	0.213157	0	0.016309	Inf	up		ENSOARG00000000985	10.2811	13.291	4.53033	5.75507	6.73898	0.000462197	-1.06268	down		ENSOARG00000000602	5.05798	4.27014	7.27884	0.609728	2.88168	1.98127	0.000858112	-1.59527	down		ENSOARG00000000571	1.80144	1.70015	0.70896	0.586377	0.0128198	0.683195	0.0214487	-1.71144	down
ENSOARG00000000530	4.48088	6.79726	4.42868	9.85983	8.43759	15.6512	0.00728543	1.06964	up		ENSOARG00000001028	0.889335	1.12391	3.00833	1.48061	3.14309	0.0490042	1.33272	up		ENSOARG00000000647	2.06905	2.22084	1.86832	6.2524	3.40882	5.85109	0.00017096	1.35441	up		ENSOARG00000000602	6.04292	7.25808	3.3885	0.609728	2.88168	1.98127	0.0028126	-1.61178	down
ENSOARG00000000572	0.614899	0.728125	0.420815	0.143778	0.278904	0.168902	0.0379153	-1.61803	down		ENSOARG00000001065	0.404279	0.989555	0.0781451	0.403838	0.136744	0.0403533	-1.76432	down		ENSOARG00000000671	15.7797	15.5332	5.99262	28.3218	24.6173	31.2778	0.00752664	1.20923	up		ENSOARG00000000644	1.06458	1.34026	1.97965	3.52281	2.21009	3.36608	0.0101096	1.05918	up
ENSOARG00000000581	0.973973	0.998544	0.511178	2.16948	2.50672	3.13069	3.55653e-05	1.60958	up		ENSOARG00000001129	0.113889	0.181804	0.0330213	0.0244656	0.0355589	0.0347604	-2.25765	down		ENSOARG00000000673	0.337415	1.23609	0.462456	0.110229	0.180928	0.136961	0.0375343	-2.22718	down		ENSOARG00000000647	1.86025	3.32228	1.94307	6.2524	3.40882	5.85109	0.00281945	1.12562	up
ENSOARG00000000602	3.92996	5.32653	3.24522	0.609728	2.88168	1.98127	0.00266673	-1.23719	down		ENSOARG00000001135	0	0.0494597	0.853424	0.359415	0.435319	0.0239671	4.4821	up		ENSOARG00000000714	5.39706	4.11281	3.82747	1.54502	1.52158	1.89412	0.0113328	-1.40357	down		ENSOARG00000000692	0.813625	1.08567	0.712899	3.7185	1.76295	3.80967	0.000272784	1.83427	up
ENSOARG00000000647	2.81159	2.60139	1.73417	6.2524	3.40882	5.85109	0.00301727	1.07804	up		ENSOARG00000001143	0.184572	0.0982129	1.60546	1.30844	1.63279	0.0330108	3.41255	up		ENSOARG00000000794	2.63177	2.21619	0.80766	4.11447	6.44422	6.28534	0.0225171	1.6102	up		ENSOARG00000000710	12.96	5.59295	5.60759	27.3821	20.6972	25.9326	0.000300658	1.62149	up
ENSOARG00000000714	2.84878	5.91799	3.29652	1.54502	1.52158	1.89412	0.0090421	-1.32247	down		ENSOARG00000001202	10.1557	6.60344	20.7198	21.9133	19.1387	2.48388e-05	1.28839	up		ENSOARG00000000812	3.34554	3.464	4.61062	3.21952	0.260828	0.0972037	0.027778	-1.64882	down		ENSOARG00000000857	216.64	517.941	630.771	163.81	175.286	149.187	0.0128583	-1.47929	down
ENSOARG00000000716	3.72365	1.27616	2.92256	1.38157	0.518204	1.41026	0.0479839	-1.30076	down		ENSOARG00000001237	0.848764	1.05382	0.136718	0.182331	0.0736123	0.0455234	-2.86556	down		ENSOARG00000000972	5.29775	3.92218	3.08005	10.8997	7.36462	10.041	0.00111296	1.23083	up		ENSOARG00000001032	4.28471	4.01007	5.09992	1.33071	2.31042	2.29816	0.00046046	-1.17152	down
ENSOARG00000000742	16.2217	14.539	17.7335	8.20016	5.36637	5.80002	5.5239e-10	-1.36303	down		ENSOARG00000001282	0.0740405	0.354579	0	0	0	0.0320646	#NAME?	down		ENSOARG00000001001	0.683201	0.44183	0.577543	1.84385	0.976189	1.54653	0.0180612	1.37982	up		ENSOARG00000001041	0.0867365	0.154045	0.218802	5.41846	0.866007	2.41877	0.00582711	4.25516	up
ENSOARG00000000788	10.7795	11.7578	12.8605	7.22871	4.58789	5.58024	1.23188e-05	-1.06367	down		ENSOARG00000001356	0.35017	1.16938	2.46238	2.49015	2.90294	0.00335337	1.78241	up		ENSOARG00000001012	0.560906	0.435289	1.14095	0	0.213043	0	0.0393797	-3.32382	down		ENSOARG00000001065	0.968339	1.03658	0.484218	0.0781451	0.403838	0.136744	0.0061148	-2.00934	down
ENSOARG00000000857	728.776	397.701	416.181	163.81	175.286	149.187	0.000401889	-1.7013	down		ENSOARG00000001557	1.50623	1.18619	8.20062	4.02517	6.354	0.000241845	2.19673	up		ENSOARG00000001032	4.13365	2.58837	5.31454	1.33071	2.31042	2.29816	0.0217733	-1.01104	down		ENSOARG00000001073	0	0.161047	0	5.20846	1.06863	2.48077	0.00105292	5.76491	up
ENSOARG00000000902	0.073981	0.438018	0.204467	0.671499	0.367019	0.948329	0.0434824	1.43198	up		ENSOARG00000001574	1.86961	2.05843	16.637	10.0554	11.8646	9.70918e-08	2.70674	up		ENSOARG00000001041	0.921986	0.159538	0.2903	5.41846	0.866007	2.41877	0.0403338	2.70785	up		ENSOARG00000001083	0.243791	0.192434	0.144703	2.99208	0.359128	1.22436	0.0468773	2.98997	up
ENSOARG00000000972	3.91406	4.89895	3.07152	10.8997	7.36462	10.041	4.87176e-05	1.21248	up		ENSOARG00000001663	0.306126	0.576389	1.1038	1.71486	1.51947	0.0255909	1.70601	up		ENSOARG00000001057	31.4878	25.7794	16.6734	8.70856	13.9265	12.7554	0.00122807	-1.03474	down		ENSOARG00000001102	0.203678	0.528248	0.241788	1.26417	0.62865	1.0306	0.00468204	1.58909	up
ENSOARG00000000974	6.64518	6.10234	6.50674	18.5327	13.4127	18.9225	0.000212293	1.36081	up		ENSOARG00000001710	0.95544	1.16744	2.31423	3.19273	1.8046	0.0495542	1.19362	up		ENSOARG00000001073	0.586152	0	0.390208	5.20846	1.06863	2.48077	0.014764	3.18998	up		ENSOARG00000001202	8.84442	9.91879	9.8431	20.7198	21.9133	19.1387	1.2003e-05	1.11503	up
ENSOARG00000001028	0.441257	2.13754	0.376948	3.00833	1.48061	3.14309	0.0442302	1.33134	up		ENSOARG00000001743	0.364802	0.0970574	1.99791	0.666115	1.64522	0.0170412	2.62772	up		ENSOARG00000001102	0.367806	0.26273	0.380264	1.26417	0.62865	1.0306	0.0131324	1.54945	up		ENSOARG00000001356	1.82248	0.225165	0.973569	2.46238	2.49015	2.90294	0.00543277	1.38608	up
ENSOARG00000001041	0.262322	0.338864	0.184545	5.41846	0.866007	2.41877	0.0139867	3.43597	up		ENSOARG00000001758	1.68308	1.988	0.482635	1.12838	0.410646	0.00352166	-1.45314	down		ENSOARG00000001242	0	0.20559	0.293933	0	0	0	0.0480536	#NAME?	down		ENSOARG00000001392	0	0	0	0.240648	0.748845	0.518281	0.0400099	Inf	up
ENSOARG00000001083	0.100542	0.204095	0.11115	2.99208	0.359128	1.22436	0.0300604	3.42813	up		ENSOARG00000001783	67.3757	46.9046	355.759	402.38	328.109	1.02792e-14	2.65526	up		ENSOARG00000001368	2.11568	2.62	3.32131	0.615373	0.359046	1.07683	0.00398898	-1.96689	down		ENSOARG00000001423	5.32227	1.75859	1.8734	7.74737	8.02256	10.2076	0.0261517	1.54136	up
ENSOARG00000001102	0.407996	0.56838	0.30954	1.26417	0.62865	1.0306	0.0205813	1.14664	up		ENSOARG00000001851	1.6598	1.45527	0.683592	0.413283	0.637973	0.0294661	-1.43558	down		ENSOARG00000001423	2.45357	2.35941	2.959	7.74737	8.02256	10.2076	0.0186912	1.75402	up		ENSOARG00000001434	0.832475	0.879101	1.08172	3.03199	1.87814	1.53437	0.0372464	1.21505	up
ENSOARG00000001138	3.58024	7.42849	3.0473	8.48596	8.76446	15.6058	0.0182581	1.18252	up		ENSOARG00000001895	0.705718	2.59975	0.314797	0.27988	0	0.0320075	-3.05217	down		ENSOARG00000001535	9.62073	10.4434	14.2325	2.13485	9.51647	5.05941	0.0211707	-1.02852	down		ENSOARG00000001525	1.3574	1.47945	1.68075	3.60773	3.39885	2.45217	0.00282434	1.07248	up
ENSOARG00000001210	2.43379	1.95561	1.23318	0.0208928	1.81111	0.0824939	0.0248879	-1.59958	down		ENSOARG00000001917	2.03657	1.76171	5.82069	2.80745	3.8424	0.0371529	1.12658	up		ENSOARG00000001557	2.60112	2.85599	2.07943	8.20062	4.02517	6.354	0.00137668	1.32696	up		ENSOARG00000001557	3.67694	1.56041	1.59578	8.20062	4.02517	6.354	0.00331941	1.45134	up
ENSOARG00000001335	7.31492	10.1814	6.49309	58.4674	11.7875	28.4278	0.0472223	2.00627	up		ENSOARG00000001999	0.0889676	0.0946811	0.945835	0.420463	1.04938	0.0189474	3.12647	up		ENSOARG00000001574	3.0433	2.34173	2.76614	16.637	10.0554	11.8646	1.24902e-08	2.26321	up		ENSOARG00000001574	2.8378	2.15535	2.08255	16.637	10.0554	11.8646	3.67188e-09	2.45332	up
ENSOARG00000001345	1.0604	0.280484	1.97511	0.246717	0.0688663	0.160641	0.030291	-2.83803	down		ENSOARG00000002076	0.656582	0.0465832	0	0	0	0.0432829	#NAME?	down		ENSOARG00000001663	0.759149	0.806184	0.118216	1.1038	1.71486	1.51947	0.0367156	1.4074	up		ENSOARG00000001639	0.261159	0.374312	0.367134	1.33608	0.593942	0.664878	0.0439362	1.38078	up
ENSOARG00000001356	0.705862	1.60534	0.794788	2.46238	2.49015	2.90294	0.00194288	1.29854	up		ENSOARG00000002151	4.63027	7.78164	9.17284	23.035	17.3351	0.0383011	1.40311	up		ENSOARG00000001664	1.3069	1.04758	0.737735	0.357516	0.790299	0.326978	0.0281224	-1.0385	down		ENSOARG00000001663	0.169982	0.512299	0.412747	1.1038	1.71486	1.51947	0.00194027	1.98633	up
ENSOARG00000001368	2.71402	1.81458	2.40506	0.615373	0.359046	1.07683	0.00203102	-1.8014	down		ENSOARG00000002178	0.680302	0.108599	0.0164374	0.0219213	0.0177005	0.0430918	-4.41457	down		ENSOARG00000001668	6.5074	4.96552	3.50089	12.0746	8.27173	11.69	3.21619e-05	1.12682	up		ENSOARG00000001679	0.0247066	0.0877587	0.0659914	3.07473	0.849224	0.764081	0.0062105	4.72664	up
ENSOARG00000001392	0	0	0	0.240648	0.748845	0.518281	0.0171778	Inf	up		ENSOARG00000002241	4.31826	3.55089	10.1965	13.183	8.62207	2.96359e-05	1.43128	up		ENSOARG00000001672	9.14344	6.67018	5.1271	2.63215	4.11408	2.90245	0.00098203	-1.08947	down		ENSOARG00000001680	0.343878	1.00431	0.938908	0.151937	0.180112	0.21815	0.0299126	-2.05471	down
ENSOARG00000001395	15.3088	16.1723	17.5625	7.30283	7.69895	9.31123	5.23096e-07	-1.05437	down		ENSOARG00000002316	2.21014	2.72009	1.13341	0.271304	0.203419	0.00231524	-2.19456	down		ENSOARG00000001694	0.077429	5.84736	9.29965	8.72432	12.1974	21.4343	0.0317351	1.45993	up		ENSOARG00000001692	3.85179	4.41663	4.71455	15.0996	6.2896	10.0668	0.0126721	1.2846	up
ENSOARG00000001409	5.01392	6.48198	4.99674	1.71539	3.50778	3.02591	0.0016061	-1.04299	down		ENSOARG00000002320	6.93234	5.22945	18.2471	14.6569	22.1158	5.82336e-07	1.58364	up		ENSOARG00000001743	0.309488	0.520384	0.228922	1.99791	0.666115	1.64522	0.0266245	2.05327	up		ENSOARG00000001710	0.789537	0.93482	0.592684	2.31423	3.19273	1.8046	0.00089702	1.66143	up
ENSOARG00000001421	0.50649	0.46588	0.594926	0.0141308	0.282678	0.0152167	0.00544083	-2.37292	down		ENSOARG00000002327	1.04232	0.724178	0.313174	0.306281	0.460895	0.04189	-1.30517	down		ENSOARG00000001783	60.5375	69.0231	35.8663	355.759	402.38	328.109	1.9171e-17	2.74474	up		ENSOARG00000001743	0	0.236203	0.213139	1.99791	0.666115	1.64522	0.0011656	3.26572	up
ENSOARG00000001439	0	0	0.0204077	0.263693	0.109896	0.0354945	0.0294906	4.29327	up		ENSOARG00000002328	1.13093	2.50091	0.468438	0.340756	0.550293	0.00912379	-2.00631	down		ENSOARG00000001811	340.342	0.426329	0.29025	0	0	0.0962758	0.0252275	-11.7445	down		ENSOARG00000001773	0.315316	0	0.538078	0.715935	1.39347	1.06266	0.0466157	1.90174	up
ENSOARG00000001465	21.9771	45.1277	23.9752	71.7486	105.962	39.4679	0.0487337	1.21568	up		ENSOARG00000002376	0.404432	0.0971881	1.27349	0.36994	1.14053	0.0447854	1.87752	up		ENSOARG00000001914	11.6886	7.72798	8.30839	23.6835	20.6682	29.4984	1.85766e-07	1.4359	up		ENSOARG00000001783	28.1456	7.80128	31.7443	355.759	402.38	328.109	1.94954e-35	4.01245	up
ENSOARG00000001557	1.69577	0.882651	1.03349	8.20062	4.02517	6.354	6.53096e-06	2.32309	up		ENSOARG00000002398	8.59866	11.0547	4.00578	5.5225	3.3329	8.68398e-05	-1.20231	down		ENSOARG00000001917	2.06963	1.63481	1.17549	5.82069	2.80745	3.8424	0.00371883	1.38459	up		ENSOARG00000001912	2.97821	3.38327	5.15986	1.51147	0.237146	0.638284	0.000680446	-2.25813	down
ENSOARG00000001559	0.0210113	0.127956	0.185826	0.0187585	0	0	0.0480253	-4.17912	down		ENSOARG00000002414	2.97583	0.950082	0.503312	0	0.0774271	0.0199241	-3.33678	down		ENSOARG00000001931	0.724697	0.337439	0.482439	0	0.0825763	0	0.0225383	-4.19979	down		ENSOARG00000001914	11.9557	7.11024	7.60556	23.6835	20.6682	29.4984	1.4689e-08	1.47357	up
ENSOARG00000001588	1.58124	1.60492	1.47206	3.74203	21.8355	13.4198	0.0104344	3.0194	up		ENSOARG00000002486	2.22527	2.19595	6.2174	5.89283	9.09535	0.0109452	1.66788	up		ENSOARG00000001968	1.92649	1.19861	2.23575	6.47996	4.02445	2.69949	0.0194609	1.31786	up		ENSOARG00000002037	22.193	17.6316	25.4046	6.54415	10.0483	14.1703	0.000675775	-1.08312	down
ENSOARG00000001639	0.317446	0.310693	0.250671	1.33608	0.593942	0.664878	0.0153215	1.52588	up		ENSOARG00000002718	0.288359	1.35537	2.11341	2.57072	3.8764	0.0188864	1.7914	up		ENSOARG00000002036	207.193	197.903	323.374	133.378	74.4959	106.561	0.00605148	-1.20209	down		ENSOARG00000002076	0.172347	0.81624	0.35804	0	0	0	0.000686117	#NAME?	down
ENSOARG00000001663	0.395123	0.452787	0.324087	1.1038	1.71486	1.51947	0.00134431	1.84562	up		ENSOARG00000002793	0	0.0270843	0.245967	0.393634	0.211895	0.0330724	4.39176	up		ENSOARG00000002076	0.0247567	0.172911	0.274681	0	0	0	0.0115278	#NAME?	down		ENSOARG00000002100	1.191	2.30164	2.9374	6.8248	4.50381	10.8556	0.00282836	1.78858	up
ENSOARG00000001664	1.62375	0.656997	1.06734	0.357516	0.790299	0.326978	0.0292014	-1.22607	down		ENSOARG00000002816	0.991895	0.405998	18.0562	2.06522	8.2358	0.0461633	3.75555	up		ENSOARG00000002118	1.53776	1.61105	0.592142	0.34779	0.608121	0.407806	0.0129358	-1.42127	down		ENSOARG00000002160	0.0774292	0.0916769	0.137876	0.114036	2.96558	2.51738	0.0146919	4.18484	up
ENSOARG00000001679	0.101893	0.227522	0.0901151	3.07473	0.849224	0.764081	0.0218246	3.45165	up		ENSOARG00000002908	0.367237	0.142117	0	0	0	0.0103541	#NAME?	down		ENSOARG00000002157	3.55002	2.95932	3.77764	1.55149	1.0449	1.19456	0.000596961	-1.42228	down		ENSOARG00000002178	0.0223216	1.34788	0.695579	0.0164374	0.0219213	0.0177005	0.0165565	-5.20506	down
ENSOARG00000001710	0.702305	1.47749	0.465844	2.31423	3.19273	1.8046	0.00258114	1.42785	up		ENSOARG00000002985	17.8152	16.124	10.1447	7.30245	7.26613	0.00177427	-1.04744	down		ENSOARG00000002173	122.886	73.3592	27.9912	167.748	129.359	155.228	0.0062242	1.05398	up		ENSOARG00000002234	16.7818	16.4291	13.8435	66.8041	24.2422	35.4757	0.0283286	1.43613	up
ENSOARG00000001743	0.164547	0.267218	0.400199	1.99791	0.666115	1.64522	0.00425977	2.33487	up		ENSOARG00000002990	0.856676	1.53499	3.01613	1.62247	2.72024	0.037845	1.03411	up		ENSOARG00000002178	0.961917	0.515079	0.0213453	0.0164374	0.0219213	0.0177005	0.0170311	-4.68776	down		ENSOARG00000002241	3.2014	3.87523	7.43282	10.1965	13.183	8.62207	0.00257166	1.14719	up
ENSOARG00000001748	1.94834	0.99895	3.26417	6.24048	3.58727	3.97795	0.0150606	1.11351	up		ENSOARG00000003044	0.821507	0.609336	6.2555	2.05354	3.70492	0.0118551	2.48205	up		ENSOARG00000002203	22.5613	25.6793	31.5962	9.91673	13.7965	15.6838	0.000532843	-1.00864	down		ENSOARG00000002301	0.0874072	0	0	1.22295	0	3.11904	0.0343327	5.63808	up
ENSOARG00000001773	0.216733	0	0.191681	0.715935	1.39347	1.06266	0.00075952	2.91118	up		ENSOARG00000003055	17.8648	34.6103	5.65252	9.06886	12.7456	0.0103943	-1.52771	down		ENSOARG00000002210	3.05516	1.15427	1.15965	0.251876	0.824501	0.419176	0.0209691	-1.81093	down		ENSOARG00000002316	4.79505	3.43447	2.44205	1.13341	0.271304	0.203419	4.83571e-06	-2.7151	down
ENSOARG00000001783	31.6542	18.0051	187.168	355.759	402.38	328.109	7.95229e-08	2.15623	up		ENSOARG00000003177	2.30481	3.78119	1.26986	1.43243	1.09965	0.0021913	-1.26786	down		ENSOARG00000002250	0	0	0	5.89934	1.21589	0	0.0152735	Inf	up		ENSOARG00000002320	8.06154	6.25068	8.69341	18.2471	14.6569	22.1158	7.1058e-07	1.26258	up
ENSOARG00000001914	7.49762	10.6966	6.65759	23.6835	20.6682	29.4984	8.95048e-10	1.53013	up		ENSOARG00000003344	4.36524	5.47401	1.47575	3.07948	2.4554	0.00174684	-1.08348	down		ENSOARG00000002316	3.72454	4.01887	3.30219	1.13341	0.271304	0.203419	1.73374e-06	-2.74928	down		ENSOARG00000002328	2.35175	2.14543	0.85813	0.468438	0.340756	0.550293	0.00356329	-1.9755	down
ENSOARG00000001917	2.66447	1.20859	1.95505	5.82069	2.80745	3.8424	0.0233129	1.05836	up		ENSOARG00000003352	1.35072	1.20406	3.8053	2.93452	3.96004	2.16232e-05	1.47415	up		ENSOARG00000002327	1.14238	1.46492	0.603245	0.313174	0.306281	0.460895	0.00496525	-1.5424	down		ENSOARG00000002376	0.0513675	0.324372	0.25916	1.27349	0.36994	1.14053	0.00663583	2.13637	up
ENSOARG00000001969	0.0316437	0.0642351	0.104947	0.310761	0.188381	0.547596	0.020357	2.33902	up		ENSOARG00000003374	0.0112577	0.143768	0.424331	0.333735	0.503805	0.0345169	2.44072	up		ENSOARG00000002376	0.191846	0.188965	0.261978	1.27349	0.36994	1.14053	0.00968411	2.12716	up		ENSOARG00000002472	1.95947	0	2.34848	70.5928	15.2466	8.48624	0.0441191	4.47493	up
ENSOARG00000001976	12.8796	6.36298	10.9448	6.20653	3.87993	4.86342	0.0123723	-1.054	down		ENSOARG00000003423	5.90387	3.44504	54.5511	100.009	65.1399	4.67135e-09	3.95815	up		ENSOARG00000002386	22.3322	21.7667	13.9852	7.56663	9.71134	7.21654	2.32702e-06	-1.21762	down		ENSOARG00000002535	1.21706	0.522946	1.62538	0.498707	0.510864	0.474766	0.0344717	-1.17333	down
ENSOARG00000002032	0	0	0	1.22321	1.89348	0.58804	1.04129e-07	Inf	up		ENSOARG00000003661	3.60449	2.97415	1.22772	1.57592	1.23944	0.0245026	-1.29571	down		ENSOARG00000002472	1.23413	1.51223	0.432409	70.5928	15.2466	8.48624	0.0273999	4.93759	up		ENSOARG00000002577	2.80391	4.52133	2.11601	1.23886	0.839201	1.35524	0.0131183	-1.45757	down
ENSOARG00000002069	3.09508	2.24212	3.14657	1.1974	1.70527	1.19023	0.000165387	-1.09347	down		ENSOARG00000003729	0.0514573	0.109524	0.28596	0.563755	0.495374	0.0418278	2.47052	up		ENSOARG00000002476	6.98936	7.71527	7.2423	15.5472	13.8914	18.7377	0.000194865	1.15197	up		ENSOARG00000002590	7.55761	16.3551	11.4503	34.9354	24.3868	18.0546	0.00904195	1.13576	up
ENSOARG00000002117	2.11854	3.41837	2.29918	2.20317	1.36746	0.380491	0.0426598	-1.02055	down		ENSOARG00000003784	0.729032	0.129308	3.2881	3.60203	3.16141	0.0277384	2.95119	up		ENSOARG00000002518	0.0427748	0	0	0.877131	0.14622	0.432912	0.00669533	5.15694	up		ENSOARG00000002620	0.216196	0.179185	0.615957	1.44876	0.509566	2.00583	0.0232398	1.97707	up
ENSOARG00000002137	0.281923	0.214609	0.233752	1.36336	1.59443	0.835702	0.00336344	2.33735	up		ENSOARG00000003790	627.884	48.2065	852.744	983.117	976.024	0.00396098	1.4552	up		ENSOARG00000002573	0.0133794	0.0155745	0.0296893	0.0114314	0.350641	0.381607	0.0247347	3.6594	up		ENSOARG00000002686	0.0267179	0.506149	0.33303	0.0196748	0.0262388	0.0423735	0.0430336	-3.29761	down
ENSOARG00000002160	0.255461	0.0648218	0.141208	0.114036	2.96558	2.51738	0.0238583	3.54918	up		ENSOARG00000003793	305.775	728.939	1298.82	912.289	1146.27	0.00227242	1.11158	up		ENSOARG00000002590	9.66104	10.8957	17.9765	34.9354	24.3868	18.0546	0.0183429	1.01549	up		ENSOARG00000002793	0	0.0395481	0.0297387	0.245967	0.393634	0.211895	0.0385356	3.61994	up
ENSOARG00000002173	23.803	120.649	19.4265	167.748	129.359	155.228	0.00585506	1.42785	up		ENSOARG00000003822	3.14974	2.71742	7.4035	5.59695	5.47408	0.00315967	1.06451	up		ENSOARG00000002652	0.236676	0.137753	0.164123	0	0	0	0.0120094	#NAME?	down		ENSOARG00000002816	0.143057	0.846903	0.0764209	18.0562	2.06522	8.2358	0.00430279	4.7371	up
ENSOARG00000002178	0.40505	0.654048	0.142478	0.0164374	0.0219213	0.0177005	0.000821152	-4.4622	down		ENSOARG00000003825	0.310596	0.136776	0.0517558	0.0552182	0	0.0315372	-2.65219	down		ENSOARG00000002654	2.13171	1.72138	1.17194	3.83961	3.41373	3.90497	0.0201463	1.18007	up		ENSOARG00000002856	0.357472	0.748827	0.612055	1.92366	0.918159	2.68203	0.0140992	1.68617	up
ENSOARG00000002196	2.58626	2.66699	1.94422	5.89251	4.90225	4.85348	0.00354522	1.08082	up		ENSOARG00000003963	130.414	80.3245	287.536	297.053	249.29	3.20616e-05	1.3909	up		ENSOARG00000002686	0.161192	0.509304	0.357691	0.0196748	0.0262388	0.0423735	0.0123919	-3.53266	down		ENSOARG00000002985	0.105323	2.39431	0.0187545	10.1447	7.30245	7.26613	2.88277e-14	3.29091	up
ENSOARG00000002198	0.399298	0.303958	0.478214	1.6636	1.14893	1.69548	0.0165898	1.89089	up		ENSOARG00000004016	2.38918	1.96313	5.62771	3.30862	4.70705	0.0176798	1.05767	up		ENSOARG00000002816	0.135626	0.172231	0.519839	18.0562	2.06522	8.2358	0.00306022	5.09473	up		ENSOARG00000003003	0.0842932	0.024951	0.318958	2.09495	0	2.05541	0.0366233	3.28877	up
ENSOARG00000002217	4.72122	1.99145	3.63773	2.29911	1.50874	1.35579	0.0385812	-1.04237	down		ENSOARG00000004244	0	0.00801893	0.0728243	0.0776962	0.101947	0.0308133	4.39226	up		ENSOARG00000002852	1.41256	1.64432	1.0084	0.308743	0.461656	0.372768	0.00448496	-1.8049	down		ENSOARG00000003020	4.91168	1.98465	3.85243	1.72234	0.880497	1.39102	0.0192466	-1.41945	down
ENSOARG00000002316	2.0996	2.7588	2.53706	1.13341	0.271304	0.203419	2.57244e-05	-2.2315	down		ENSOARG00000004290	0.557875	0.0516263	1.64096	1.31306	1.06024	0.0408907	2.12248	up		ENSOARG00000002874	0.00592009	0.0137828	0.374402	0.237734	0.971381	0.648178	0.0310486	2.19591	up		ENSOARG00000003044	0.261379	0.425529	0.959948	6.2555	2.05354	3.70492	0.00138356	2.87764	up
ENSOARG00000002327	1.20436	0.42131	0.963024	0.313174	0.306281	0.460895	0.0277907	-1.30515	down		ENSOARG00000004293	6.31478	5.89045	3.35448	3.52765	2.06869	0.0200829	-1.03741	down		ENSOARG00000003003	0.0726498	0.0211424	0.0201516	2.09495	0	2.05541	0.00447461	5.22557	up		ENSOARG00000003297	0	0.788268	0.106391	0.892523	0.46941	1.08294	0.0499958	1.44524	up
ENSOARG00000002354	0.680333	0.794099	0.789721	0.0759238	0.141755	0.376088	0.0148127	-1.9792	down		ENSOARG00000004353	0.0360896	0.0896169	0	0	0	0.0313293	#NAME?	down		ENSOARG00000003020	4.50201	2.503	3.54128	1.72234	0.880497	1.39102	0.0390176	-1.37869	down		ENSOARG00000003346	0.549362	1.04072	1.95646	4.38526	8.1574	7.42317	3.79204e-07	2.49533	up
ENSOARG00000002376	0.127107	0.0860072	0.093679	1.27349	0.36994	1.14053	0.000408805	3.14212	up		ENSOARG00000004415	28.756	42.794	15.5906	10.9234	7.98883	4.59672e-05	-1.63785	down		ENSOARG00000003029	5.29894	4.95772	9.79879	1.86176	4.30743	2.88574	0.0395646	-1.14393	down		ENSOARG00000003385	4.19853	2.54983	4.99486	1.93234	1.70617	1.83688	0.00675196	-1.09403	down
ENSOARG00000002384	0.488905	1.50327	0.492799	5.78987	3.64674	6.01361	1.53411e-09	2.59801	up		ENSOARG00000004527	45.693	57.6225	13.6944	29.9001	19.9655	1.76885e-05	-1.29481	down		ENSOARG00000003158	0.869013	1.54602	1.69188	4.18878	1.81226	2.95683	0.0178502	1.13661	up		ENSOARG00000003423	5.98922	29.3846	20.5631	54.5511	100.009	65.1399	8.48182e-05	1.97338	up
ENSOARG00000002398	9.45186	8.76024	10.3346	4.00578	5.5225	3.3329	7.93987e-08	-1.19104	down		ENSOARG00000004566	0.155352	0	1.27622	1.30153	1.94018	0.0107926	4.25823	up		ENSOARG00000003177	2.77432	2.9772	2.3842	1.26986	1.43243	1.09965	0.00391518	-1.07434	down		ENSOARG00000003604	53.7648	29.7294	26.8886	93.0913	60.2154	69.9299	0.0030498	1.02338	up
ENSOARG00000002414	4.59058	0.408713	4.54074	0.503312	0	0.0774271	0.00753267	-4.06774	down		ENSOARG00000004627	1.76774	1.74293	0.200997	0.301561	0.568163	0.0129181	-2.31125	down		ENSOARG00000003232	0	0	0.0234778	0.180795	0.072334	0.447784	0.0114147	4.85148	up		ENSOARG00000003650	1.31965	2.23587	3.31907	1.53128	0.763627	0.894947	0.0485902	-1.09901	down
ENSOARG00000002466	15.1005	16.4573	10.6731	3.42562	0	7.02075	0.000515573	-2.05958	down		ENSOARG00000004675	1.5829	0.923311	0.454936	0.618609	0.778069	0.0419442	-1.03449	down		ENSOARG00000003374	0.0127343	0.20753	0.113032	0.424331	0.333735	0.503805	0.0448279	1.93058	up		ENSOARG00000003687	1.98665	1.60151	1.82523	0.342392	0.383978	1.3156	0.00324427	-1.40885	down
ENSOARG00000002472	0	1.19877	0.137442	70.5928	15.2466	8.48624	0.011307	6.11693	up		ENSOARG00000004696	12.0354	3.2185	26.0078	11.8532	27.621	0.0300776	1.50546	up		ENSOARG00000003501	99.4336	74.7103	121.429	18.0077	27.0978	28.155	1.40969e-07	-2.00176	down		ENSOARG00000003784	0.15947	0	0.141982	3.2881	3.60203	3.16141	0.000647103	5.06924	up
ENSOARG00000002486	2.58415	1.37811	2.42102	6.2174	5.89283	9.09535	0.000360526	1.6883	up		ENSOARG00000004831	9.76058	6.90492	2.29018	4.65408	2.52489	0.0281348	-1.41101	down		ENSOARG00000003661	2.64035	3.51263	4.24481	1.22772	1.57592	1.23944	0.00881924	-1.35173	down		ENSOARG00000003790	56.8836	108.145	74.4643	852.744	983.117	976.024	3.11541e-39	3.55502	up
ENSOARG00000002512	5.09983	6.94368	4.30865	11.105	9.72515	15.0277	0.00187592	1.09116	up		ENSOARG00000005001	0.105614	0.224792	0	0	0	0.0401187	#NAME?	down		ENSOARG00000003728	0.491145	0.307853	0.503017	1.2912	0.667263	1.98135	0.0357278	1.60998	up		ENSOARG00000003822	3.26096	2.39977	2.83187	7.4035	5.59695	5.47408	0.00018167	1.12835	up
ENSOARG00000002518	0.0409361	0.124647	0	0.877131	0.14622	0.432912	0.0281837	3.10482	up		ENSOARG00000005123	0.115243	0.490578	0	0.049513	0	0.034074	-4.20511	down		ENSOARG00000003744	12.2887	2.68776	8.45398	45.593	26.8064	11.0232	0.0423214	1.86025	up		ENSOARG00000003963	87.1759	111.064	109.734	287.536	297.053	249.29	2.34403e-06	1.44158	up
ENSOARG00000002555	0.454396	1.14738	0.575852	2.60227	1.25358	1.513	0.0208391	1.26652	up		ENSOARG00000005159	0.761283	0.94906	4.01516	3.25208	2.96548	0.00462729	1.99212	up		ENSOARG00000003784	0	0	0.152495	3.2881	3.60203	3.16141	0.000138386	6.00105	up		ENSOARG00000004000	0.0826594	0.188749	0.0735944	0.904347	0.214539	0.383919	0.0398393	2.13085	up
ENSOARG00000002577	3.08364	1.58727	2.5324	1.23886	0.839201	1.35524	0.0392938	-1.1111	down		ENSOARG00000005211	1.29865	1.13077	2.44604	2.0828	2.89511	0.0350628	1.01836	up		ENSOARG00000003790	205.363	115.292	155.693	852.744	983.117	976.024	3.00547e-20	2.58271	up		ENSOARG00000004067	0.560811	0.792523	0.499308	1.3455	0.923844	1.96533	0.0482011	1.19363	up
ENSOARG00000002632	0.431337	0.267542	0.264916	0.0641819	0	0.11519	0.0458974	-2.47019	down		ENSOARG00000005289	3.77823	7.71061	10.9977	8.6511	16.2839	0.0396883	1.05447	up		ENSOARG00000003792	9.4266	8.65665	14.201	5.96008	5.25127	4.60638	0.00730782	-1.01854	down		ENSOARG00000004101	0.383642	1.09017	0.683139	2.37308	1.80846	5.47596	0.0153987	2.15971	up
ENSOARG00000002640	2.26808	1.72054	2.08296	4.79334	3.60766	6.05888	5.29946e-05	1.20962	up		ENSOARG00000005301	7.89934	5.57881	2.17033	3.47142	4.45629	0.00514114	-1.01454	down		ENSOARG00000003822	3.90014	3.01998	2.04371	7.4035	5.59695	5.47408	0.000955119	1.07497	up		ENSOARG00000004353	0.0631545	0.0934695	0.0281143	0	0	0	0.0465013	#NAME?	down
ENSOARG00000002686	0.0881503	0.492087	0.194902	0.0196748	0.0262388	0.0423735	0.0343565	-3.17616	down		ENSOARG00000005322	162.225	198.036	505.78	265.239	341.084	0.0295356	1.03897	up		ENSOARG00000003895	13.8924	12.5761	10.6227	27.3899	27.8949	23.0188	4.08828e-05	1.10271	up		ENSOARG00000004457	2.1007	2.21836	0	0.0836179	0.111515	0	0.0146796	-4.46171	down
ENSOARG00000002703	5.49153	5.82114	5.11946	9.23431	12.6869	12.2505	3.41343e-06	1.01388	up		ENSOARG00000005483	20.736	12.7101	6.96268	9.49744	7.78282	0.00616567	-1.05963	down		ENSOARG00000003973	0.115319	0.214782	0.153538	0	0.0262802	0	0.0258921	-4.18257	down		ENSOARG00000004462	5.36261	3.08731	6.87704	12.2092	10.1947	11.1577	0.00803469	1.13809	up
ENSOARG00000002741	0.18184	0	0.100513	3.53098	1.13665	0.699277	0.0129861	4.21331	up		ENSOARG00000005504	0.239076	0.17492	0.953128	0.866669	0.746453	0.0441061	2.04012	up		ENSOARG00000004016	1.98606	2.78015	1.47835	5.62771	3.30862	4.70705	0.00304237	1.15475	up		ENSOARG00000004474	4.61399	5.76805	3.6388	6.82125	12.5242	10.0942	0.00247011	1.07059	up
ENSOARG00000002744	469.841	463.865	493.547	211.451	225.957	122.138	1.22535e-06	-1.38968	down		ENSOARG00000005530	0.0482092	0	0.792082	0.621376	0.100347	0.0370475	4.37939	up		ENSOARG00000004209	6.4173	5.82159	4.86132	18.1884	11.8509	17.8623	2.98877e-07	1.50992	up		ENSOARG00000004495	1.20009	1.65955	0.791164	2.69167	1.99727	2.8404	0.0036006	1.04659	up
ENSOARG00000002754	73.8362	16.71	60.4653	7.19679	11.0672	18.8319	0.0175474	-2.0731	down		ENSOARG00000005714	3.81196	3.41976	0.740894	0.311311	1.54101	0.00012133	-2.07598	down		ENSOARG00000004234	5.91565	5.14959	2.6553	17.562	9.57384	6.41505	0.0464705	1.32795	up		ENSOARG00000004566	0	0.120705	0.453829	1.27622	1.30153	1.94018	0.0302865	2.98019	up
ENSOARG00000002793	0.0551012	0	0	0.245967	0.393634	0.211895	0.0137515	3.9037	up		ENSOARG00000005853	74.8216	96.1875	198.57	126.34	219.268	0.00444087	1.07952	up		ENSOARG00000004312	139.939	0	0	0	0	0	0.0269348	#NAME?	down		ENSOARG00000004665	1.53168	2.18479	2.4697	0.683851	0.509299	0.478183	0.000150995	-1.88162	down
ENSOARG00000002795	4.11147	1.94361	3.76698	1.3325	1.77705	1.46197	0.0237638	-1.14621	down		ENSOARG00000005893	0.620163	0.329995	0	0	0	0.0403402	#NAME?	down		ENSOARG00000004318	0.600701	0.520378	0.480492	1.42634	0.851613	1.24033	0.0258036	1.15871	up		ENSOARG00000004669	0.013642	0.0484568	0.230772	0.853894	0.174165	0.897877	0.0128179	2.72637	up
ENSOARG00000002816	0.648981	1.50902	0.0521785	18.0562	2.06522	8.2358	0.0180052	3.64984	up		ENSOARG00000006039	1.03138	0.622968	0.282876	0.0179643	0.246592	0.0269724	-2.18571	down		ENSOARG00000004353	0.0136077	0.126723	0.120785	0	0	0	0.0115336	#NAME?	down		ENSOARG00000004675	1.36883	1.58486	1.6663	0.454936	0.618609	0.778069	0.00103782	-1.31789	down
ENSOARG00000002817	0.0112221	0.0569509	0.0620309	0.0500947	0.240507	0.312877	0.0479911	2.16608	up		ENSOARG00000006079	0.0138183	0.0147057	0.480781	0.30278	0.287626	0.00333673	4.64325	up		ENSOARG00000004627	1.61732	0.889993	3.36052	0.200997	0.301561	0.568163	0.024206	-2.4615	down		ENSOARG00000004696	5.83234	6.13827	6.92363	26.0078	11.8532	27.621	0.000770133	1.79826	up
ENSOARG00000002852	1.24705	1.74436	1.3207	0.308743	0.461656	0.372768	0.000143367	-1.95692	down		ENSOARG00000006119	18.3139	19.4566	40.9462	41.9152	84.9872	0.0236635	1.55595	up		ENSOARG00000004665	1.09143	1.089	2.36425	0.683851	0.509299	0.478183	0.0394387	-1.43958	down		ENSOARG00000004727	0.166946	0.790665	0.509616	2.03725	0.772919	1.41841	0.0269787	1.53169	up
ENSOARG00000002856	0.657744	1.03592	0.676995	1.92366	0.918159	2.68203	0.0440207	1.17913	up		ENSOARG00000006353	0.533482	1.01802	10.9698	3.0824	19.2029	0.0127833	3.83039	up		ENSOARG00000004669	0.0352729	0.0684334	0.0391359	0.853894	0.174165	0.897877	0.00103948	3.77369	up		ENSOARG00000004852	0.724872	1.21451	0.231362	0.0352501	0.181326	0.0488044	0.0093958	-3.03501	down
ENSOARG00000002875	0	0	0	16.8077	0.106841	0.0517616	0.0330935	Inf	up		ENSOARG00000006378	1.20902	2.94405	4.40657	5.70503	5.96083	0.00162691	1.3624	up		ENSOARG00000004696	8.5175	6.42034	2.6337	26.0078	11.8532	27.621	0.000787362	1.93473	up		ENSOARG00000004871	11.0506	6.44897	8.22221	11.6085	21.1218	22.0248	0.00644066	1.09197	up
ENSOARG00000002891	0.126005	0.255783	0.278599	5.62475	3.60062	2.18052	0.000212157	4.07537	up		ENSOARG00000006382	3.21989	3.66682	1.77826	2.10305	1.12004	0.0182907	-1.05103	down		ENSOARG00000004737	10.9458	7.47413	5.17895	15.2212	24.7355	15.0406	0.00337658	1.25238	up		ENSOARG00000004915	2.87175	1.94296	3.98741	5.61409	5.77479	8.43118	0.0100408	1.17522	up
ENSOARG00000002895	0.708736	0.109731	0.956153	1.12608	1.18711	1.59372	0.0344692	1.09398	up		ENSOARG00000006422	1.59099	0.760697	0.245133	0.118878	0.527942	0.0438804	-1.99818	down		ENSOARG00000004852	0.294691	0.788995	0.411977	0.0352501	0.181326	0.0488044	0.00208395	-2.47454	down		ENSOARG00000004942	0.62509	0.497894	0.45535	1.63201	1.25008	1.32482	0.00773935	1.42034	up
ENSOARG00000002898	4.63614	2.15742	5.21781	9.26434	7.89136	7.78793	0.000364801	1.01328	up		ENSOARG00000006446	6.23004	6.34938	2.08878	2.17098	2.44994	0.000250436	-1.49948	down		ENSOARG00000004915	4.50817	3.18985	1.79807	5.61409	5.77479	8.43118	0.023586	1.09332	up		ENSOARG00000005017	0.150841	0.178597	0.0111915	0.00925644	0.0123446	0.00996776	0.0412617	-3.43173	down
ENSOARG00000002909	0.412717	3.24645	0.380219	3.8689	3.76737	3.58757	0.0135137	1.43773	up		ENSOARG00000006562	0.646984	1.43966	1.7764	3.18401	2.65513	0.0113593	1.27651	up		ENSOARG00000004964	88.5951	57.0017	127.023	41.6447	35.1829	42.0916	0.0198842	-1.18893	down		ENSOARG00000005022	1.03684	1.20814	1.64112	3.6358	3.10322	1.73574	0.0153682	1.13329	up
ENSOARG00000002913	38.44	14.2053	35.5956	64.3413	49.5985	110.339	0.0158541	1.30074	up		ENSOARG00000006627	2.06443	1.86787	5.69422	3.22893	3.7499	0.0152672	1.09964	up		ENSOARG00000004971	7.22641	6.09916	12.1492	4.80364	4.30996	3.38533	0.0413088	-1.0192	down		ENSOARG00000005034	0.798699	0.436462	1.09401	4.97668	2.4738	1.55902	0.0277867	1.96537	up
ENSOARG00000003003	0.0869088	0	0.441961	2.09495	0	2.05541	0.03859	2.9323	up		ENSOARG00000006720	37.1071	54.1196	128.821	77.8256	132.609	0.00143772	1.30549	up		ENSOARG00000005049	0.336831	0.0653491	0.174403	2.32152	0.0895546	2.05572	0.0300201	2.98166	up		ENSOARG00000005049	0.0911899	0.21594	0.255167	2.32152	0.0895546	2.05572	0.0283205	2.99671	up
ENSOARG00000003018	1.49941	2.27071	1.73654	1.0093	0.453397	0.96101	0.0100902	-1.22294	down		ENSOARG00000006821	0.29253	0.674518	0.0942411	0	0	0.0313267	-3.9251	down		ENSOARG00000005101	0.00592169	0.00689325	0.913262	0.814586	1.62615	1.30215	0.00804544	1.97258	up		ENSOARG00000005159	1.25607	1.69	0.609995	4.01516	3.25208	2.96548	0.00380876	1.52842	up
ENSOARG00000003029	14.5658	7.47212	10.1995	1.86176	4.30743	2.88574	7.0608e-05	-1.87664	down		ENSOARG00000006831	0.162424	0.0785703	0.442394	0.81837	0.875944	0.0232412	2.54875	up		ENSOARG00000005159	2.11594	0.257766	1.61061	4.01516	3.25208	2.96548	0.0215451	1.38063	up		ENSOARG00000005211	1.36547	1.20395	0.862214	2.44604	2.0828	2.89511	0.00369491	1.11647	up
ENSOARG00000003044	1.69779	1.6138	0.62564	6.2555	2.05354	3.70492	0.0278879	1.57287	up		ENSOARG00000007216	0.374495	0	2.17164	3.98221	1.46158	0.0107702	3.74455	up		ENSOARG00000005211	1.17686	1.38937	1.14832	2.44604	2.0828	2.89511	0.0142216	1.01838	up		ENSOARG00000005282	0.622465	0.847556	0.415651	1.38659	1.20732	1.53016	0.0470845	1.13091	up
ENSOARG00000003057	9.718	8.72265	10.2557	2.87085	5.0145	3.40609	1.38752e-07	-1.38811	down		ENSOARG00000007239	1.71564	3.49714	5.4718	3.79325	7.19711	0.0247115	1.06935	up		ENSOARG00000005243	0	0	0.111573	1.20287	1.37501	0.370088	0.0100693	4.68678	up		ENSOARG00000005400	0	0	0	0.664985	0.394151	0.238696	0.0423455	Inf	up
ENSOARG00000003086	0.690722	0.937214	0.434047	1.57087	2.36332	1.57276	0.000510855	1.37648	up		ENSOARG00000007452	2.95915	3.80902	0.00907921	1.6104	0.00977691	1.24342e-05	-2.65129	down		ENSOARG00000005456	1.37327	1.20868	0.483115	3.19089	1.48846	2.63486	0.0215866	1.29176	up		ENSOARG00000005456	1.36019	0.368108	0.65741	3.19089	1.48846	2.63486	0.00323347	1.62546	up
ENSOARG00000003112	53.4852	42.2745	66.3093	18.9159	29.6116	17.4225	1.10648e-05	-1.33875	down		ENSOARG00000007459	6.44237	4.10464	1.81262	3.07291	2.382	0.0057028	-1.13363	down		ENSOARG00000005489	70.8675	86.2012	93.944	36.5777	41.4296	43.2845	3.44786e-05	-1.03578	down		ENSOARG00000005504	0.019611	0.232196	0.157143	0.953128	0.866669	0.746453	0.00307027	2.65174	up
ENSOARG00000003142	0.640061	1.37147	0.668283	2.65083	2.03222	2.83744	0.00311506	1.44927	up		ENSOARG00000007473	0.190937	0.0530084	2.75199	1.44451	0.492472	0.0215899	3.67685	up		ENSOARG00000005504	0.169021	0.275454	0.168779	0.953128	0.866669	0.746453	0.0204509	2.08857	up		ENSOARG00000005539	0.886517	1.19481	1.79691	4.25028	3.6955	3.31302	1.99685e-05	1.54401	up
ENSOARG00000003186	0.49179	0.678851	0.239219	1.124	0.983715	1.64535	0.0448024	1.3706	up		ENSOARG00000007561	0	0.444654	0.563462	1.20231	1.2742	0.00913525	2.18593	up		ENSOARG00000005545	1.29655	0.954137	2.79441	0.292862	0.373586	0.562176	0.0257549	-2.04201	down		ENSOARG00000005591	0.849388	1.55225	1.36452	3.27697	1.66831	3.20666	0.0160865	1.11819	up
ENSOARG00000003206	35.7338	33.3984	33.6923	17.2919	17.7637	16.6693	1.10505e-07	-1.03212	down		ENSOARG00000007592	17.9237	9.26997	36.8942	33.6336	32.9206	1.23644e-06	1.33347	up		ENSOARG00000005591	1.30498	1.38941	0.706293	3.27697	1.66831	3.20666	0.0134142	1.29152	up		ENSOARG00000005673	0.889353	2.45701	0.369516	2.61964	3.49361	4.88964	0.0204835	1.56136	up
ENSOARG00000003297	0.0140804	0.371572	0.108962	0.892523	0.46941	1.08294	0.00268094	2.26798	up		ENSOARG00000007623	1.6804	1.51838	6.29709	3.41231	3.08527	0.0306061	1.41302	up		ENSOARG00000005652	0.640061	1.30388	0.79893	2.57486	2.12719	3.09172	0.0220618	1.52523	up		ENSOARG00000005674	0.159553	0	0.0473519	1.95822	1.61915	2.4461	8.99236e-08	4.87194	up
ENSOARG00000003341	40.2112	130.501	39.2078	137.535	178.424	241.605	0.00590358	1.36786	up		ENSOARG00000007690	0.0098003	0.0104297	0.189435	0.328426	0.326388	0.00238811	4.78788	up		ENSOARG00000005674	0	0	0.0508583	1.95822	1.61915	2.4461	1.55393e-09	6.8448	up		ENSOARG00000005727	0.758753	0.377724	0.468274	1.45399	1.00764	2.1674	0.00246451	1.53226	up
ENSOARG00000003346	0.706878	0.349533	0.661236	4.38526	8.1574	7.42317	1.02282e-11	3.49414	up		ENSOARG00000007766	0.0177453	0.0944246	0.00428761	0.00571806	0	0.0478282	-4.06608	down		ENSOARG00000005727	0.876883	0.856395	0.560665	1.45399	1.00764	2.1674	0.0283254	1.03747	up		ENSOARG00000006014	15.5525	22.2269	17.7508	7.36603	7.06486	6.8455	2.17158e-05	-1.38037	down
ENSOARG00000003423	13.2146	4.51262	7.44099	54.5511	100.009	65.1399	1.16617e-08	3.08168	up		ENSOARG00000007889	0.627902	0.632106	0.11481	0.0874933	0.105971	0.0173914	-2.62199	down		ENSOARG00000005764	11.9716	17.1573	10.1087	33.7944	19.7354	26.4067	0.0014733	1.05223	up		ENSOARG00000006050	0.12141	0	0	3.84443	0	1.29972	0.0409469	5.42447	up
ENSOARG00000003592	0.165759	0.159148	0.22287	0.557953	1.17882	3.06444	0.0229438	3.08287	up		ENSOARG00000007963	0.024439	0	0.118098	0.251998	0.610434	0.0305098	4.71591	up		ENSOARG00000005908	0.167162	0.152891	0.331195	0.0102017	0.0136053	0.0109857	0.00277253	-4.22356	down		ENSOARG00000006065	0	0.472574	0.193832	0	0	0	0.0456474	#NAME?	down
ENSOARG00000003661	3.66136	2.70427	2.81247	1.22772	1.57592	1.23944	0.00375991	-1.22454	down		ENSOARG00000007978	7.20135	5.49992	2.9068	1.47419	2.6893	0.0071695	-1.43655	down		ENSOARG00000005972	7.43056	7.13824	3.8369	2.22975	2.93702	2.46023	0.000454313	-1.24054	down		ENSOARG00000006068	9.65267	15.9426	14.6086	33.4969	26.417	25.3573	4.87975e-06	1.08988	up
ENSOARG00000003728	0.216939	0.238536	0.59957	1.2912	0.667263	1.98135	0.00782046	1.85806	up		ENSOARG00000007984	0.967068	0.94311	8.50302	5.80672	7.47314	2.2462e-15	2.92094	up		ENSOARG00000006045	0.288448	0.0395028	0.0188258	1.37724	0.0193338	1.42063	0.0401563	3.07555	up		ENSOARG00000006102	0.0223904	0.0265105	0.0199349	0.016488	0.505743	0.763468	0.0228557	4.21628	up
ENSOARG00000003729	0	0.0848083	0.0769776	0.28596	0.563755	0.495374	0.00231253	3.0144	up		ENSOARG00000008077	0.9014	108.559	239.43	156.847	238.285	0.00042928	1.95372	up		ENSOARG00000006050	0	0	0	3.84443	0	1.29972	0.0121857	Inf	up		ENSOARG00000006131	1.09357	1.326	0.410573	0.397797	0.232907	0.365678	0.0401597	-1.5031	down
ENSOARG00000003744	10.7784	1.71946	7.30136	45.593	26.8064	11.0232	0.0274775	2.03834	up		ENSOARG00000008181	0.288027	0.831994	5.12998	1.64407	6.03808	0.00534001	2.92921	up		ENSOARG00000006102	0.0192976	0.0224638	0.0214111	0.016488	0.505743	0.763468	0.0193117	4.35564	up		ENSOARG00000006292	4.68105	7.17994	6.33048	19.9121	19.1546	6.28504	0.0397007	1.32579	up
ENSOARG00000003784	0	0	0.290826	3.2881	3.60203	3.16141	8.13412e-05	5.06997	up		ENSOARG00000008233	61.5104	48.8259	20.6475	29.2283	26.304	4.5495e-06	-1.1293	down		ENSOARG00000006139	8.89505	13.8409	21.4611	5.85406	3.57255	4.91226	0.012666	-1.61968	down		ENSOARG00000006305	2.14749	1.25049	1.66123	5.54783	3.11161	5.86249	0.00317736	1.52733	up
ENSOARG00000003790	137.413	61.7609	394.626	852.744	983.117	976.024	2.11598e-14	2.20097	up		ENSOARG00000008263	0.918046	0.844528	0.172942	0.401113	0.186232	0.0140986	-1.80747	down		ENSOARG00000006305	3.0342	1.69537	1.00995	5.54783	3.11161	5.86249	0.0136835	1.37523	up		ENSOARG00000006346	0.116303	0.110163	0.0621291	0	0	0	0.0381117	#NAME?	down
ENSOARG00000003793	499.258	418.678	472.607	1298.82	912.289	1146.27	1.40896e-08	1.23157	up		ENSOARG00000008321	2.38224	2.27101	1.02836	0.502863	1.09508	0.00370339	-1.4165	down		ENSOARG00000006353	0.416176	2.05895	1.03895	10.9698	3.0824	19.2029	0.00668912	3.25438	up		ENSOARG00000006353	0.748457	1.0577	0.64488	10.9698	3.0824	19.2029	0.00332827	3.76211	up
ENSOARG00000003903	963.885	945.404	989.467	342.385	428.92	362.659	8.20479e-06	-1.39553	down		ENSOARG00000008446	22.4692	16.9877	4.92503	10.3382	9.8349	0.00012918	-1.25041	down		ENSOARG00000006377	0.0763529	0.0136739	0.254145	0.822984	0.087001	0.788958	0.0399771	2.28715	up		ENSOARG00000006489	5.57141	2.46204	5.49161	1.61525	2.12828	2.21248	0.00829598	-1.17826	down
ENSOARG00000003963	83.5873	56.3696	129.607	287.536	297.053	249.29	1.28415e-10	1.58832	up		ENSOARG00000008598	13.5766	12.2905	5.43684	6.00478	6.09669	6.50255e-05	-1.15377	down		ENSOARG00000006378	3.60442	3.03555	0.977291	4.40657	5.70503	5.96083	0.00381403	1.11481	up		ENSOARG00000006609	38.4327	16.5288	22.2036	77.3916	50.4772	37.0025	0.0316374	1.10576	up
ENSOARG00000003991	7.28958	2.76701	3.43969	0.449741	1.51711	1.53837	0.0102434	-1.99317	down		ENSOARG00000008620	5.28548	0.258887	23.1832	17.9292	73.3523	0.029785	3.76039	up		ENSOARG00000006400	5.15747	4.63139	9.04252	2.45994	2.02779	2.87842	0.0135795	-1.3495	down		ENSOARG00000006632	0.0963465	3.42226	2.31607	0.425691	0.0946187	0.0764006	0.0493117	-3.27796	down
ENSOARG00000004000	0.0827893	0.0593146	0.15613	0.904347	0.214539	0.383919	0.0318966	2.29836	up		ENSOARG00000008709	1.11827	0.510995	0.341941	0.25244	0.138082	0.0186572	-1.74358	down		ENSOARG00000006422	0	0.121446	0	0.245133	0.118878	0.527942	0.0338167	2.90852	up		ENSOARG00000006711	0.111608	0.052858	0.139116	0.75612	0.460347	0.566417	0.0171789	2.56345	up
ENSOARG00000004007	13.1528	5.84364	9.09735	4.30826	1.71667	6.48752	0.0373436	-1.21083	down		ENSOARG00000008800	111.973	97.5464	11.1212	22.988	6.40596	4.83366e-31	-2.96301	down		ENSOARG00000006520	2.89436	3.24445	2.79506	10.1208	5.1913	8.77804	0.00895132	1.45207	up		ENSOARG00000006796	0	0.841225	0	1.70911	7.48915	5.78425	0.00017927	4.14203	up
ENSOARG00000004016	1.92475	2.62511	1.63577	5.62771	3.30862	4.70705	0.000746527	1.10256	up		ENSOARG00000008867	9.01957	7.32228	23.0659	15.5555	14.1886	0.00748541	1.10296	up		ENSOARG00000006609	25.9505	22.3095	25.2288	77.3916	50.4772	37.0025	0.0088043	1.18827	up		ENSOARG00000006797	0.00832177	0.25618	0.163001	0.288019	0.457662	0.541116	0.0367023	1.58649	up
ENSOARG00000004101	0.949311	0.513881	1.46926	2.37308	1.80846	5.47596	0.0404542	1.67346	up		ENSOARG00000008891	2.75009	1.72583	0.393321	0.802708	1.30272	0.00574219	-1.44196	down		ENSOARG00000006632	1.41165	0.966622	2.57971	0.425691	0.0946187	0.0764006	0.0163943	-3.04284	down		ENSOARG00000006862	15.5454	14.2066	7.98071	26.819	27.362	28.1943	2.79699e-06	1.12949	up
ENSOARG00000004139	0	0.214909	0	3.27664	0.294122	1.93386	0.00530793	4.64896	up		ENSOARG00000009090	0.637909	0.640303	1.45724	2.22371	2.33874	0.00342404	1.64054	up		ENSOARG00000006711	0.057715	0.111974	0.234798	0.75612	0.460347	0.566417	0.0333702	2.13609	up		ENSOARG00000006879	1.25483	0.988015	1.55852	0.522086	0.369699	0.731366	0.00470765	-1.2236	down
ENSOARG00000004141	0.851635	0.236032	0.892854	0.179561	0.190825	0.353485	0.047267	-1.49813	down		ENSOARG00000009129	4.28634	4.32768	2.30147	1.4166	2.09705	0.0411997	-1.15721	down		ENSOARG00000006771	5.02814	4.46063	1.97958	0.996068	1.99835	1.59493	0.0082863	-1.28859	down		ENSOARG00000006897	0.894507	1.05911	0.855403	2.14689	4.4574	3.41527	0.000116523	1.83532	up
ENSOARG00000004234	5.49281	3.49197	4.88858	17.562	9.57384	6.41505	0.0488993	1.23795	up		ENSOARG00000009196	26.5305	28.5492	85.4069	40.4246	73.4939	0.0142914	1.26635	up		ENSOARG00000006786	2.41341	2.139	1.81716	0.736645	1.07723	1.12097	0.000821846	-1.09599	down		ENSOARG00000006959	0.361456	3.74006	3.56796	18.3427	17.9339	65.1265	0.00933971	3.72014	up
ENSOARG00000004235	0.933446	1.43269	0.604059	2.27651	2.08726	2.80166	0.0253188	1.22964	up		ENSOARG00000009214	17.6293	29.5556	139.107	46.6903	126.925	0.00996733	2.14147	up		ENSOARG00000006796	0.530702	0.0950422	0	1.70911	7.48915	5.78425	0.000138349	4.63679	up		ENSOARG00000006960	1.32607	0.910189	0.581765	3.21254	2.20822	1.50873	0.0127964	1.30656	up
ENSOARG00000004280	0.922379	0.547584	1.15438	0.00776873	0.870288	0.00836573	0.0363868	-1.61131	down		ENSOARG00000009216	0.0600933	0.127905	2.55547	1.00692	6.12911	0.0126802	5.0945	up		ENSOARG00000006797	0.322753	0.00834904	0.00795779	0.288019	0.457662	0.541116	0.032687	1.98104	up		ENSOARG00000007216	0	0	0	2.17164	3.98221	1.46158	6.46402e-05	Inf	up
ENSOARG00000004353	0	0.0925249	0.100778	0	0	0	0.0223646	#NAME?	down		ENSOARG00000009229	5.68116	4.1932	18.2433	11.5743	16.8797	0.0119643	1.64961	up		ENSOARG00000006862	12.2119	13.171	12.3007	26.819	27.362	28.1943	1.27476e-05	1.14727	up		ENSOARG00000007232	0.209346	0.514801	0.243737	0.996109	0.648403	1.23866	0.0237111	1.57506	up
ENSOARG00000004415	32.1525	17.7994	29.1797	15.5906	10.9234	7.98883	0.00177467	-1.23579	down		ENSOARG00000009266	11.0577	16.475	59.2848	19.8034	51.121	0.0308607	1.65449	up		ENSOARG00000006959	9.4271	4.28861	3.03568	18.3427	17.9339	65.1265	0.0398702	2.62699	up		ENSOARG00000007257	0.0981686	0.488177	0.139844	0.947003	1.42684	0.941931	0.000188439	2.18899	up
ENSOARG00000004474	3.27447	4.04899	3.86556	6.82125	12.5242	10.0942	0.000192644	1.35284	up		ENSOARG00000009277	201.432	301.956	90.5551	128.828	150.873	0.00257018	-1.03639	down		ENSOARG00000007050	2.69839	1.27811	2.43643	6.05797	4.30459	3.56139	0.0125839	1.13875	up		ENSOARG00000007271	0.93652	1.17963	2.3063	4.04982	3.0527	2.78095	0.015487	1.16828	up
ENSOARG00000004495	1.17877	1.25777	1.0776	2.69167	1.99727	2.8404	0.00129827	1.05868	up		ENSOARG00000009288	24.9932	11.7376	0.418769	0.203084	0.0204977	3.36457e-08	-6.42076	down		ENSOARG00000007202	12.4016	13.4328	12.9292	28.5059	23.954	24.6921	3.53525e-05	1.01233	up		ENSOARG00000007322	2.22264	3.17224	2.209	10.0234	3.20649	5.88868	0.0406508	1.33786	up
ENSOARG00000004535	124.002	108.527	120.116	57.1294	63.8112	59.7155	1.81002e-07	-1.00644	down		ENSOARG00000009305	0.891579	0.428046	0.0388732	0.190088	0.0418605	0.00067409	-2.88356	down		ENSOARG00000007216	0	0	0	2.17164	3.98221	1.46158	3.64986e-05	Inf	up		ENSOARG00000007334	0.676395	1.09969	1.21342	2.89189	2.17125	2.6338	0.00068156	1.36921	up
ENSOARG00000004566	0.168175	0	0.0929594	1.27622	1.30153	1.94018	0.00178018	4.06637	up		ENSOARG00000009308	2.18367	0.26144	9.15416	5.03105	10.3122	4.92426e-05	2.72555	up		ENSOARG00000007232	0.444132	0.339282	0.18479	0.996109	0.648403	1.23866	0.0405214	1.60629	up		ENSOARG00000007459	5.08988	4.05058	5.6708	1.81262	3.07291	2.382	0.00220833	-1.02375	down
ENSOARG00000004602	0.0099336	0.0100824	0.0109817	0.00886856	0.130101	0.152801	0.0389942	3.18516	up		ENSOARG00000009367	2.38885	3.83831	7.22054	4.43742	8.31165	0.0297983	1.09148	up		ENSOARG00000007271	1.76888	0.47979	0.99083	4.04982	3.0527	2.78095	0.00241306	1.63779	up		ENSOARG00000007472	5.88873	4.892	3.54417	11.1998	10.0025	11.7775	1.31473e-05	1.20696	up
ENSOARG00000004627	1.7448	4.02743	2.14667	0.200997	0.301561	0.568163	0.000119225	-2.93124	down		ENSOARG00000009420	0.788138	1.80654	3.71093	2.29216	4.31158	0.0258973	1.40285	up		ENSOARG00000007375	0.067713	0	0.187822	1.07031	0.308625	0.529554	0.0166465	2.89036	up		ENSOARG00000007520	4.85942	4.41243	6.06113	2.14372	2.00235	2.97314	0.00071584	-1.10334	down
ENSOARG00000004665	1.37279	1.5448	1.68259	0.683851	0.509299	0.478183	0.00171457	-1.49926	down		ENSOARG00000009461	27.2501	13.2917	1.20494	11.6216	7.06695	0.0255829	-1.63029	down		ENSOARG00000007452	3.03913	4.89843	1.63882	0.00907921	1.6104	0.00977691	0.00228548	-2.52219	down		ENSOARG00000007561	0.31882	0.105696	0.090834	0.563462	1.20231	1.2742	0.000468036	2.56201	up
ENSOARG00000004669	0.0787656	0.0456829	0.398063	0.853894	0.174165	0.897877	0.0462619	1.84162	up		ENSOARG00000009537	1.13065	0.476292	5.23609	2.06453	2.2799	0.0444322	1.98703	up		ENSOARG00000007520	3.79768	5.05717	5.95753	2.14372	2.00235	2.97314	0.0047236	-1.04752	down		ENSOARG00000007592	19.982	11.0051	12.8319	36.8942	33.6336	32.9206	1.86519e-07	1.24551	up
ENSOARG00000004696	5.47879	7.05277	6.05687	26.0078	11.8532	27.621	0.000718906	1.77674	up		ENSOARG00000009604	0.771317	0.504145	1.79615	0.994163	1.67502	0.02531	1.21541	up		ENSOARG00000007561	0.60452	0.0511784	0.19512	0.563462	1.20231	1.2742	0.015214	1.87041	up		ENSOARG00000007600	0.633588	3.037	0.664187	4.1088	3.16131	3.26574	0.00648231	1.28103	up
ENSOARG00000004837	0.446128	0.953282	1.1681	0.125778	0.195697	0.203165	0.00836354	-2.33346	down		ENSOARG00000009651	0.846437	0.725316	0.159363	0.283373	0.263134	0.0417268	-1.75098	down		ENSOARG00000007592	18.0324	8.45522	14.296	36.8942	33.6336	32.9206	9.40651e-08	1.36375	up		ENSOARG00000007698	0.315056	0.721189	0.467507	1.56216	1.69142	1.14923	0.0221034	1.55307	up
ENSOARG00000004846	1.04004	0.380713	0.782222	0.00761089	0.203001	0.106545	0.000135282	-2.84544	down		ENSOARG00000009653	38.9213	23.3099	154.461	70.3481	82.4856	0.0213718	1.7151	up		ENSOARG00000007600	0.572493	1.98901	0.53747	4.1088	3.16131	3.26574	7.72654e-06	1.79473	up		ENSOARG00000007804	0	0.0696723	0	0.368325	0.0577891	0.279974	0.0382404	3.33818	up
ENSOARG00000004945	0.395117	0.655349	0.287653	1.08408	0.768771	1.14885	0.0365991	1.12588	up		ENSOARG00000009678	1.82221	5.32835	9.82606	9.76784	6.3806	0.00553682	1.27594	up		ENSOARG00000007698	0.597381	0.421451	0.220935	1.56216	1.69142	1.14923	0.0164579	1.86521	up		ENSOARG00000007929	38.9743	29.5542	69.6602	9.64438	17.2582	34.4362	0.0497896	-1.1718	down
ENSOARG00000004990	1.26701	1.67846	1.35522	3.43024	3.21303	2.53111	0.0010801	1.05414	up		ENSOARG00000009680	0	0	0.503137	0.243998	0.197019	0.0407099	Inf	up		ENSOARG00000007766	0.00501822	0.0876233	0.089085	0.00428761	0.00571806	0	0.0158746	-4.17668	down		ENSOARG00000007934	3.27129	0.028067	0.780898	5.07973	3.07295	6.8987	0.00790496	1.89111	up
ENSOARG00000004992	5.37377	5.47559	4.11551	14.083	10.5677	10.9695	1.31687e-07	1.21191	up		ENSOARG00000009686	0.570733	0.497352	2.754	2.39878	4.77343	0.000147225	2.6206	up		ENSOARG00000007787	3.51133	3.09319	3.26412	19.5412	7.05585	6.91972	0.0420562	1.78946	up		ENSOARG00000007973	0.188665	0.0203074	0.0152704	0.631504	0.690595	0.802439	0.000925608	3.25026	up
ENSOARG00000005033	0.17246	0.0875214	0.266919	0	0.0616013	0	0.0198298	-3.14214	down		ENSOARG00000009764	7.01812	11.368	4.35565	5.1954	3.95638	0.00473138	-1.03438	down		ENSOARG00000007852	1.97109	1.82382	4.03747	0.280686	0.287946	0.581261	0.00110387	-2.77001	down		ENSOARG00000007984	1.026	1.51849	1.23635	8.50302	5.80672	7.47314	2.49678e-17	2.53089	up
ENSOARG00000005034	1.21622	1.02869	0.728294	4.97668	2.4738	1.55902	0.0470592	1.56464	up		ENSOARG00000009791	52.8786	23.4691	91.231	101.43	77.9847	0.000120261	1.23075	up		ENSOARG00000007940	1.43025	1.86423	1.46396	3.47672	2.59376	4.80034	0.00210131	1.2099	up		ENSOARG00000007988	3.4481	2.85781	2.29223	10.529	12.1228	4.79408	0.00354431	1.68151	up
ENSOARG00000005036	1.48592	2.62135	1.54492	0.994954	0.884597	0.884341	0.0424588	-1.07117	down		ENSOARG00000009983	2.7505	2.46251	14.4982	37.1173	13.6767	0.0133639	3.05239	up		ENSOARG00000007963	0.055289	0	0	0.118098	0.251998	0.610434	0.0148424	4.20339	up		ENSOARG00000007998	1.28281	1.82461	3.12973	0.374179	1.14528	0.502015	0.00774226	-1.62283	down
ENSOARG00000005101	0.623386	0.523433	0.306989	0.814586	1.62615	1.30215	0.00303258	1.32046	up		ENSOARG00000010085	2.21789	0.786773	0.289207	0.453757	0.201515	0.0230591	-2.2656	down		ENSOARG00000007973	0.0147823	0.0172076	0.246018	0.631504	0.690595	0.802439	0.00262899	2.9011	up		ENSOARG00000008075	2.56316	2.07295	3.72862	1.11392	1.10041	1.35502	0.00390185	-1.22376	down
ENSOARG00000005159	1.01249	1.50563	0.598706	4.01516	3.25208	2.96548	0.00084165	1.6768	up		ENSOARG00000010166	0.67503	1.04884	2.74008	2.57537	1.18026	0.0451977	1.32807	up		ENSOARG00000007979	79.4208	43.9837	47.6381	92.2226	114.225	135.777	0.000248618	1.0252	up		ENSOARG00000008077	126.586	15.4081	94.2708	239.43	156.847	238.285	0.00179738	1.43463	up
ENSOARG00000005182	1.75776	2.03731	1.37906	4.16119	3.17305	4.42645	0.000519897	1.14402	up		ENSOARG00000010189	0.727956	0.175405	4.77884	1.92966	2.87323	0.00182886	2.81424	up		ENSOARG00000007984	2.51181	2.47579	1.17989	8.50302	5.80672	7.47314	1.81264e-10	1.85333	up		ENSOARG00000008089	0.570022	0.625528	1.44826	0.174046	0.191151	0.275619	0.00908122	-2.04084	down
ENSOARG00000005200	0.133934	0.0776797	0.105761	0.409968	0.592305	0.551841	0.0213085	2.24827	up		ENSOARG00000010199	0.115827	0.0838202	3.22398	1.85718	1.36458	1.53903e-05	4.42537	up		ENSOARG00000008075	2.80062	5.14311	7.05849	1.11392	1.10041	1.35502	0.00213327	-2.06829	down		ENSOARG00000008094	0.435179	0.994979	0.387455	0.143655	0.235793	0.130895	0.0389608	-1.83225	down
ENSOARG00000005211	1.1742	1.47554	0.768255	2.44604	2.0828	2.89511	0.00169264	1.07801	up		ENSOARG00000010249	1.34542	1.0618	0.336037	0.798871	0.0471992	0.0394353	-1.61746	down		ENSOARG00000008147	0.628296	1.93975	0.575871	0.256741	0.0622538	0.201069	0.036242	-2.56689	down		ENSOARG00000008181	0.86405	1.85427	1.82707	5.12998	1.64407	6.03808	0.0316661	1.49848	up
ENSOARG00000005274	3.05266	3.72989	2.2785	2.48234	0.393558	0.691642	0.0180521	-1.37591	down		ENSOARG00000010320	0.523243	0.171337	0.0389001	0	0.0418895	0.0439161	-3.69826	down		ENSOARG00000008181	1.07051	1.02942	2.32385	5.12998	1.64407	6.03808	0.0296365	1.53388	up		ENSOARG00000008233	67.0406	60.0998	53.5914	20.6475	29.2283	26.304	2.55084e-07	-1.24374	down
ENSOARG00000005301	7.66027	5.51389	7.75993	2.17033	3.47142	4.45629	7.60233e-05	-1.09692	down		ENSOARG00000010377	0.939641	1.36248	3.15579	3.6485	1.66248	0.0256605	1.29122	up		ENSOARG00000008263	0.985658	0.840042	1.04478	0.172942	0.401113	0.186232	0.0040675	-1.89979	down		ENSOARG00000008263	0.796454	0.91883	1.39095	0.172942	0.401113	0.186232	0.000653146	-2.02702	down
ENSOARG00000005351	0.805961	1.03198	0.589429	0.918808	2.17019	2.1338	0.0383287	1.06088	up		ENSOARG00000010379	0.0685415	0.255301	0	0	0	0.040045	#NAME?	down		ENSOARG00000008280	6.10266	5.93699	4.56605	9.75213	11.2222	13.22	0.00142681	1.06493	up		ENSOARG00000008313	6.98305	0.09238	3.29965	7.95755	7.01107	9.03309	0.0323366	1.21891	up
ENSOARG00000005362	0.0733815	0.0446882	0.0162248	0.196542	0.646544	0.183426	0.0368846	2.89086	up		ENSOARG00000010394	4.70018	8.63216	2.59678	3.27644	2.87924	0.0106835	-1.19723	down		ENSOARG00000008313	2.95881	3.71823	1.26838	7.95755	7.01107	9.03309	0.000797586	1.62808	up		ENSOARG00000008321	2.11801	1.24009	2.01007	1.02836	0.502863	1.09508	0.0124097	-1.02488	down
ENSOARG00000005400	0	0	0	0.664985	0.394151	0.238696	0.0181303	Inf	up		ENSOARG00000010462	36.2033	25.9398	110.581	68.7163	102.59	3.76749e-05	1.58936	up		ENSOARG00000008321	2.44062	2.29619	2.01053	1.02836	0.502863	1.09508	0.00201942	-1.33951	down		ENSOARG00000008353	2.38646	2.46793	1.85579	0.689599	1.61683	0.88632	0.0219975	-1.07013	down
ENSOARG00000005423	0.441257	0.08143	0.443468	1.25347	1.91046	2.31393	0.00352567	2.45716	up		ENSOARG00000010475	0.178893	0	0.979744	0.768595	1.05503	0.037909	3.36862	up		ENSOARG00000008368	1.45767	1.53094	1.54503	3.81636	2.10172	3.17307	0.00142812	1.02275	up		ENSOARG00000008358	1.07118	1.77082	0.899724	3.11057	3.59258	1.37831	0.039457	1.11573	up
ENSOARG00000005450	2.61996	1.86449	3.44016	0.985811	0.764917	1.04227	0.000112444	-1.54596	down		ENSOARG00000010493	6.72328	4.2956	29.8341	23.2438	29.3367	3.8065e-16	2.30953	up		ENSOARG00000008446	16.3298	17.9521	18.828	4.92503	10.3382	9.8349	1.68375e-05	-1.06779	down		ENSOARG00000008456	22.7995	12.7373	14.6528	59.5075	28.4086	56.753	0.00130088	1.53401	up
ENSOARG00000005452	36.6956	40.7941	32.5631	17.3053	21.3818	17.5389	5.20998e-07	-1.00989	down		ENSOARG00000010659	47.1209	36.4086	172.815	82.3699	217.867	0.00765549	1.90817	up		ENSOARG00000008456	11.6527	11.32	16.0355	59.5075	28.4086	56.753	9.43211e-05	1.90275	up		ENSOARG00000008517	5.40025	2.38354	3.17215	8.32986	6.27621	8.29849	0.000936924	1.07038	up
ENSOARG00000005456	1.08986	1.41526	0.637862	3.19089	1.48846	2.63486	0.0107084	1.18026	up		ENSOARG00000010766	11.2967	7.85583	4.00593	7.08267	2.49744	0.0150087	-1.0886	down		ENSOARG00000008498	2.08497	1.30062	3.04383	0.818257	0.943474	1.06471	0.0265555	-1.1796	down		ENSOARG00000008620	0.744972	1.80993	0.404855	23.1832	17.9292	73.3523	0.000936089	5.26649	up
ENSOARG00000005489	99.0915	55.1861	97.9236	36.5777	41.4296	43.2845	0.00174426	-1.09887	down		ENSOARG00000010854	105.097	69.1508	405.361	226.062	184.079	0.022718	1.63842	up		ENSOARG00000008502	0.00890056	0.12433	0.118504	0.00760471	0.0101418	0.00818911	0.0393823	-3.27862	down		ENSOARG00000008794	7.22463	15.7649	17.9148	2.68205	8.56099	6.67591	0.0262609	-1.19185	down
ENSOARG00000005504	0.161756	0.311939	0.0715293	0.953128	0.866669	0.746453	0.00549509	2.19669	up		ENSOARG00000010939	0.395334	0.439338	3.63822	5.34353	4.76982	2.25348e-19	3.44877	up		ENSOARG00000008620	4.02753	0.718293	1.88737	23.1832	17.9292	73.3523	0.00564915	4.13138	up		ENSOARG00000008800	19.4254	85.6228	60.9407	11.1212	22.988	6.40596	0.0224293	-2.03263	down
ENSOARG00000005539	1.46244	1.33433	0.885768	4.25028	3.6955	3.31302	3.9942e-07	1.57262	up		ENSOARG00000011009	3.2545	4.07229	16.4442	13.9693	20.3709	4.15505e-12	2.20137	up		ENSOARG00000008862	153.666	92.2615	46.7283	213.556	202.881	162.994	0.00391063	1.02472	up		ENSOARG00000008862	86.622	60.9663	109.467	213.556	202.881	162.994	1.18369e-05	1.17995	up
ENSOARG00000005642	1.8209	0.609397	2.06744	0.131811	0.375012	0.264956	0.00144398	-2.58896	down		ENSOARG00000011053	1.2155	1.21322	2.43707	1.56668	3.43365	0.0456994	1.02126	up		ENSOARG00000008913	21.4596	0.0538372	0.0513143	0	0	0	0.0486811	#NAME?	down		ENSOARG00000008891	2.80818	2.75	1.34738	0.393321	0.802708	1.30272	0.00629277	-1.4697	down
ENSOARG00000005673	0.733558	1.14163	0.594702	2.61964	3.49361	4.88964	0.00230504	2.11219	up		ENSOARG00000011110	2.83715	1.14915	0.634351	0.909662	0.705134	0.0491778	-1.42286	down		ENSOARG00000008972	5.40902	2.67781	1.66936	33.8911	8.74206	110.859	0.0409305	4.00464	up		ENSOARG00000008940	7.26505	30.605	35.076	101.901	40.0527	53.2709	0.0396734	1.4286	up
ENSOARG00000005674	0.175471	0.133574	0.169737	1.95822	1.61915	2.4461	6.69687e-07	3.61086	up		ENSOARG00000011167	0.0110965	0.531412	3.14229	2.8605	7.06779	0.00042618	4.00311	up		ENSOARG00000008985	0.87152	0.452628	0.505799	2.89834	0.763894	1.67773	0.0488937	1.57543	up		ENSOARG00000008943	0.79327	1.18007	0.45274	2.11195	1.19853	1.90327	0.0471109	1.10666	up
ENSOARG00000005813	3.81544	3.37933	8.08167	2.37246	2.80694	1.25253	0.0486989	-1.28692	down		ENSOARG00000011173	0.888457	1.02702	1.97396	2.00072	1.9184	0.0273455	1.03025	up		ENSOARG00000009027	0.0463959	0.162024	0.36034	0	0	0	0.0386214	#NAME?	down		ENSOARG00000008972	1.74571	2.56233	3.98201	33.8911	8.74206	110.859	0.0353427	4.20891	up
ENSOARG00000005814	85.5373	55.5887	95.8978	34.083	36.7431	30.7641	0.000103127	-1.2635	down		ENSOARG00000011235	36.8959	31.3201	69.3472	82.442	55.4116	0.000507703	1.01089	up		ENSOARG00000009054	0.689279	0.802369	0.365759	5.01867	0.512221	3.58451	0.0400271	2.32783	up		ENSOARG00000008997	2.17143	1.51357	2.08921	6.18974	4.86688	6.01274	4.22902e-05	1.5697	up
ENSOARG00000005837	0.686218	0.993874	0.375049	0.261579	0.367208	0.363219	0.0487639	-1.09268	down		ENSOARG00000011416	0.641677	0.317985	0.0757454	0.101016	0.0662725	0.00218369	-2.57648	down		ENSOARG00000009058	2.86058	3.3046	3.97036	1.46368	1.96439	1.58616	0.00264072	-1.00261	down		ENSOARG00000009129	6.8998	10.4751	3.89563	2.30147	1.4166	2.09705	0.00738376	-1.86828	down
ENSOARG00000005908	0.354234	0.011598	0.530567	0.0102017	0.0136053	0.0109857	0.0127746	-4.73102	down		ENSOARG00000011418	0.491813	0.664857	0.334013	0.085663	0.0553354	0.0321015	-1.86174	down		ENSOARG00000009129	9.67638	9.57559	15.541	2.30147	1.4166	2.09705	1.20154e-06	-2.57207	down		ENSOARG00000009143	484.308	424.879	1134.6	310.894	231.191	222.966	0.0447602	-1.40871	down
ENSOARG00000005941	16.0345	16.0177	15.8755	5.83595	10.5455	7.19355	1.8277e-08	-1.06606	down		ENSOARG00000011453	45.8399	26.9384	98.8507	82.4318	89.4468	6.29986e-06	1.30185	up		ENSOARG00000009138	9.15278	7.99615	6.27885	3.81682	2.87166	3.68321	0.000218989	-1.14984	down		ENSOARG00000009196	32.4901	25.7479	28.5813	85.4069	40.4246	73.4939	0.00421634	1.20581	up
ENSOARG00000005972	12.7337	3.97096	17.7699	2.22975	2.93702	2.46023	0.0135473	-2.21945	down		ENSOARG00000011545	0.601645	1.17204	1.33542	1.87296	2.20217	0.0343321	1.01701	up		ENSOARG00000009196	28.6716	31.5576	21.2903	85.4069	40.4246	73.4939	0.0021425	1.31579	up		ENSOARG00000009204	30.955	13.6094	23.9126	69.8095	25.0352	80.1376	0.0351049	1.36024	up
ENSOARG00000006014	17.9423	33.1813	12.4947	7.36603	7.06486	6.8455	0.0131982	-1.61933	down		ENSOARG00000011548	5.89155	3.07556	2.51737	2.33407	1.60067	0.0396118	-1.06728	down		ENSOARG00000009204	27.0716	27.9737	15.4535	69.8095	25.0352	80.1376	0.0284411	1.33959	up		ENSOARG00000009216	0.315479	0.37353	0.0702203	2.55547	1.00692	6.12911	0.0123597	3.67065	up
ENSOARG00000006024	4.66904	5.31433	4.42104	8.97182	11.1306	10.5927	1.13952e-05	1.04985	up		ENSOARG00000011558	0.904028	1.09571	0.16989	0.0647342	0.0261351	0.00034571	-3.51862	down		ENSOARG00000009229	4.56062	6.15348	5.75011	18.2433	11.5743	16.8797	0.00656401	1.52053	up		ENSOARG00000009229	4.56997	5.41089	8.03051	18.2433	11.5743	16.8797	0.00892357	1.38056	up
ENSOARG00000006045	0.0162382	0.0164814	0.0179515	1.37724	0.0193338	1.42063	0.00224476	5.7577	up		ENSOARG00000011604	2.24396	2.18739	4.58351	3.71864	6.48612	0.00601241	1.14491	up		ENSOARG00000009247	27.2422	32.6342	24.1974	79.0481	33.922	67.626	0.0115025	1.1261	up		ENSOARG00000009230	114.166	77.0568	159.09	56.7173	51.2865	63.5237	0.00787295	-1.02431	down
ENSOARG00000006050	0	0	0.166062	3.84443	0	1.29972	0.043945	4.92172	up		ENSOARG00000011614	3.32082	3.94824	0.0752225	0	0.0540021	5.6576e-10	-6.39865	down		ENSOARG00000009253	20.2867	21.3756	14.1123	49.1502	18.7802	45.5123	0.0336531	1.0506	up		ENSOARG00000009247	39.7074	25.8654	24.5949	79.0481	33.922	67.626	0.0280329	1.00905	up
ENSOARG00000006083	13.5518	13.2197	11.3177	3.69265	4.29706	5.98609	2.00342e-11	-1.48985	down		ENSOARG00000011629	11.864	9.039	34.2034	27.7162	24.2037	0.00189062	1.45186	up		ENSOARG00000009266	25.0162	17.0126	15.0466	59.2848	19.8034	51.121	0.0355163	1.21771	up		ENSOARG00000009305	0.844623	0.416684	0.798996	0.0388732	0.190088	0.0418605	4.06242e-05	-2.92363	down
ENSOARG00000006102	0.0184681	0.0187447	0.0204167	0.016488	0.505743	0.763468	0.017847	4.42905	up		ENSOARG00000011642	0.315226	0.174444	0.0243727	0.016252	0.0131228	0.00761554	-3.77786	down		ENSOARG00000009305	0.439807	0.450177	1.11056	0.0388732	0.190088	0.0418605	0.00433429	-2.88592	down		ENSOARG00000009426	0.45759	0.464393	1.05926	2.09881	1.06568	1.67952	0.0166914	1.29832	up
ENSOARG00000006121	15.8826	12.652	13.9865	5.82027	8.71739	6.31575	8.41717e-08	-1.07005	down		ENSOARG00000011751	0.570527	0.430077	0.218263	0.0612802	0.0618515	0.0432362	-2.13437	down		ENSOARG00000009340	2.51555	2.04579	1.12152	3.19943	3.58624	4.42816	0.0164803	1.01147	up		ENSOARG00000009461	15.6908	18.7511	13.3197	1.20494	11.6216	7.06695	0.0033044	-1.26703	down
ENSOARG00000006131	0.96721	0.772119	0.94912	0.397797	0.232907	0.365678	0.0195153	-1.4722	down		ENSOARG00000011843	0.0742888	0.0988246	0	0	0	0.0401924	#NAME?	down		ENSOARG00000009349	0.840046	0.695375	0.863007	2.16386	1.43225	2.24427	0.00192025	1.30079	up		ENSOARG00000009469	23.6661	16.4937	21.8392	2.99992	12.0701	8.47308	2.36359e-05	-1.39673	down
ENSOARG00000006151	0.297585	1.04456	0.685383	1.69371	0.959608	1.57353	0.0399621	1.022	up		ENSOARG00000011876	2.42925	2.3405	1.16696	1.11163	1.31648	0.0383398	-1.00053	down		ENSOARG00000009426	0.664818	0.577141	0.487585	2.09881	1.06568	1.67952	0.00860328	1.51132	up		ENSOARG00000009510	0.032746	0.0775433	0.0291549	4.76248	0.225111	0.934808	0.0454027	5.42194	up
ENSOARG00000006182	0.224143	0.0909998	0.396468	0	0	0	0.0157849	#NAME?	down		ENSOARG00000011955	33.3255	34.7417	14.3926	11.5033	15.4063	4.40007e-07	-1.31239	down		ENSOARG00000009604	0.638907	0.647767	0.716503	1.79615	0.994163	1.67502	0.0115107	1.17329	up		ENSOARG00000009514	0.785315	0.749023	0.369018	2.24893	1.30681	1.43576	0.0256241	1.39725	up
ENSOARG00000006212	3.25401	4.78027	4.54401	0.114676	2.19206	2.34628	0.00718266	-1.48344	down		ENSOARG00000012019	14.3286	13.543	31.9215	28.5478	32.9591	0.00339683	1.15295	up		ENSOARG00000009651	1.05694	0.767157	1.20028	0.159363	0.283373	0.263134	0.00645455	-2.08713	down		ENSOARG00000009537	0.757422	1.02491	1.22485	5.23609	2.06453	2.2799	0.0260818	1.68208	up
ENSOARG00000006215	1.20343	0.89573	0.946064	3.05608	2.89754	1.69688	0.0257428	1.29018	up		ENSOARG00000012043	1.71046	1.52776	0.472319	0.27558	0.508615	0.0451026	-1.9577	down		ENSOARG00000009674	0.255651	0.0595191	0	1.81297	0.174782	1.67003	0.00966177	3.59505	up		ENSOARG00000009571	30.0688	28.6251	25.1804	15.3552	13.8751	12.1526	1.96216e-05	-1.01377	down
ENSOARG00000006305	2.26494	1.91572	2.40762	5.54783	3.11161	5.86249	0.00969644	1.09941	up		ENSOARG00000012206	0.329174	1.37206	0.0927904	0	0	0.0110462	-4.76031	down		ENSOARG00000009785	67.1213	0.172863	0.0411905	0	0	0.0683142	0.0469285	-9.89888	down		ENSOARG00000009604	0.510144	1.18916	0.475489	1.79615	0.994163	1.67502	0.0135665	1.03981	up
ENSOARG00000006331	1.77591	1.58864	1.39759	0.591204	0.609252	0.57876	0.0436743	-1.46139	down		ENSOARG00000012344	26.0353	13.3621	41.8998	51.1158	36.3719	0.000944877	1.12083	up		ENSOARG00000009865	0.0708306	0	0	0.726219	0.645669	0.782027	0.0082798	4.98914	up		ENSOARG00000009651	0.851216	0.888273	1.42581	0.159363	0.283373	0.263134	0.0019482	-2.16247	down
ENSOARG00000006353	3.14647	0.565952	2.44372	10.9698	3.0824	19.2029	0.0274769	2.38773	up		ENSOARG00000012472	0.263317	0.0747272	1.71356	1.17656	1.55293	0.00135489	3.12039	up		ENSOARG00000009911	4.87931	3.43852	2.73687	8.6814	3.5861	10.06	0.0496715	1.04136	up		ENSOARG00000009653	39.8325	46.4391	51.1889	154.461	70.3481	82.4856	0.0283904	1.16962	up
ENSOARG00000006364	22.3285	26.009	16.0697	71.3093	51.5645	46.6786	3.53734e-05	1.35839	up		ENSOARG00000012573	1.60651	1.81823	0.0246453	0.13147	0.0530783	2.18889e-05	-4.62972	down		ENSOARG00000009979	0.125538	0.0913344	0.147992	0.0201114	0.00894035	0.0144379	0.0219625	-3.05338	down		ENSOARG00000009674	0.0889871	0.140482	0.184866	1.81297	0.174782	1.67003	0.0144345	3.14914	up
ENSOARG00000006378	2.39579	2.74688	2.26845	4.40657	5.70503	5.96083	0.000318375	1.07453	up		ENSOARG00000012643	5.26171	4.12146	2.89011	1.66388	0.527203	0.00610268	-1.46897	down		ENSOARG00000009983	2.1927	1.8856	3.52872	14.4982	37.1173	13.6767	0.00279443	3.1096	up		ENSOARG00000009686	0.645929	0.347046	2.09256	2.754	2.39878	4.77343	0.0110255	1.69137	up
ENSOARG00000006422	0.973481	1.06406	0.965815	0.245133	0.118878	0.527942	0.0329804	-1.7962	down		ENSOARG00000012673	17.7499	8.95938	30.9704	26.2181	26.9817	0.000189458	1.06206	up		ENSOARG00000009990	15.8168	11.9628	10.6338	4.03021	3.90081	6.73227	2.87777e-07	-1.36706	down		ENSOARG00000009742	10.4461	26.8883	32.3224	55.5853	42.5527	58.4271	0.000253881	1.17228	up
ENSOARG00000006431	0.804996	1.01228	0.464655	0.464285	0.296868	0.253406	0.0249056	-1.20618	down		ENSOARG00000012993	1.81505	1.20259	4.16483	4.55816	2.38259	0.0106356	1.28835	up		ENSOARG00000010175	6.34727	3.10448	6.39144	0.0455728	0.303885	0.0490749	1.00514e-08	-5.2972	down		ENSOARG00000009791	8.40513	31.6632	54.184	91.231	101.43	77.9847	5.60097e-05	1.52713	up
ENSOARG00000006449	0.171965	0.523622	0.12674	0	0	0	0.0199704	#NAME?	down		ENSOARG00000013155	32.4815	55.341	81.861	82.9306	123.412	0.0025935	1.12268	up		ENSOARG00000010176	0.0822129	0.114842	0.0912169	0.632191	0.112414	0.400899	0.036291	2.0123	up		ENSOARG00000009812	1.43111	2.29921	1.59372	0.921695	0.989683	0.689658	0.00341285	-1.02954	down
ENSOARG00000006483	0.170106	0.0863268	0.188054	0	0	0	0.0159187	#NAME?	down		ENSOARG00000013175	1.62273	1.35152	5.31867	3.1146	6.6636	0.00194417	1.75036	up		ENSOARG00000010189	1.46044	0.271285	0.172381	4.77884	1.92966	2.87323	0.00247402	2.38378	up		ENSOARG00000009851	0.502394	1.1217	0.498418	2.08233	1.11364	1.37728	0.0289856	1.11172	up
ENSOARG00000006489	4.61714	4.06928	5.58433	1.61525	2.12828	2.21248	1.28023e-06	-1.30351	down		ENSOARG00000013224	0.190105	0.0449585	1.55151	1.14347	1.60479	0.000968523	3.59575	up		ENSOARG00000010199	0.125778	0.0671067	0.255848	3.22398	1.85718	1.36458	2.75692e-06	3.84768	up		ENSOARG00000009865	0	0	0	0.726219	0.645669	0.782027	0.00497214	Inf	up
ENSOARG00000006492	16.412	13.3915	11.9376	30.821	20.3496	34.8481	0.000872887	1.00174	up		ENSOARG00000013534	11.0928	26.5703	2.51614	7.50318	7.8424	0.0314973	-1.67079	down		ENSOARG00000010356	0.707442	0.321371	0.134011	0.11794	0.0983051	0.0317509	0.0462433	-2.17991	down		ENSOARG00000009956	5.67315	7.76468	5.16221	2.20764	2.39213	3.26051	9.0414e-05	-1.24188	down
ENSOARG00000006560	5.42193	7.18561	3.98328	13.8847	16.8585	8.76513	0.00339809	1.21304	up		ENSOARG00000013596	2.79358	6.47619	1.86874	1.81946	1.97531	0.0478087	-1.29917	down		ENSOARG00000010379	0.271361	0	0.30108	0	0	0	0.0212689	#NAME?	down		ENSOARG00000009964	1.68578	1.14476	1.77681	0.465522	0.718217	0.766687	0.0149372	-1.23727	down
ENSOARG00000006608	2.53955	3.35755	2.36945	1.18991	1.5583	0.675308	9.12313e-06	-1.31043	down		ENSOARG00000013801	48.3308	62.8452	28.5103	31.4902	19.5593	3.39353e-05	-1.07178	down		ENSOARG00000010493	9.65188	9.64177	16.6179	29.8341	23.2438	29.3367	7.91039e-07	1.20541	up		ENSOARG00000009983	0.53862	0.502044	1.09174	14.4982	37.1173	13.6767	5.48584e-05	4.94121	up
ENSOARG00000006629	1.04928	1.13599	1.30177	0.489208	0.971688	0.179337	0.0283883	-1.12733	down		ENSOARG00000014005	49.0979	40.5505	15.739	32.7623	18.2901	0.00173868	-1.01959	down		ENSOARG00000010659	69.2448	95.664	30.9565	172.815	82.3699	217.867	0.020633	1.30385	up		ENSOARG00000010166	0.744194	0.98603	0.678356	2.74008	2.57537	1.18026	0.00727299	1.43798	up
ENSOARG00000006711	0.12888	0.205558	0.142478	0.75612	0.460347	0.566417	0.0334135	1.86453	up		ENSOARG00000014009	18.8026	22.2226	68.7377	54.1268	60.6536	3.38671e-08	1.57146	up		ENSOARG00000010676	5.27449	3.28312	6.70558	0.0312956	1.83641	2.05573	0.00116535	-1.95715	down		ENSOARG00000010189	0.144213	0.213436	0.160496	4.77884	1.92966	2.87323	1.2841e-06	4.21615	up
ENSOARG00000006720	50.6717	54.3462	35.0894	128.821	77.8256	132.609	0.000249376	1.23555	up		ENSOARG00000014015	3.18807	3.23975	8.27057	10.968	5.01438	0.0213638	1.32545	up		ENSOARG00000010704	7.78158	24.4296	23.3801	9.4631	7.64829	3.95313	0.0484847	-1.38866	down		ENSOARG00000010199	0.237146	0.201588	0.162415	3.22398	1.85718	1.36458	1.45317e-05	3.43191	up
ENSOARG00000006736	0.163691	0.299057	0.229219	0.92556	0.324829	0.66096	0.0353542	1.42912	up		ENSOARG00000014043	2.25079	6.60336	0.0097988	0.470445	0.495935	0.00269104	-3.77931	down		ENSOARG00000010714	0.0462405	0.0284967	0.105627	0.00929606	0.00929809	0	0.0115166	-3.27268	down		ENSOARG00000010377	0.554956	1.13163	0.384297	3.15579	3.6485	1.66248	0.00022198	2.03457	up
ENSOARG00000006737	0.0185991	0.0188776	0.0205615	0.116235	1.70515	1.00134	0.00380409	5.55648	up		ENSOARG00000014090	0	0	0.501707	0.278787	0.270131	0.0249818	Inf	up		ENSOARG00000010726	3.59827	2.1702	5.81495	10.571	8.48242	7.80881	0.000197647	1.22002	up		ENSOARG00000010379	0.584724	0.319532	0	0	0	0	0.0230773	#NAME?	down
ENSOARG00000006786	3.39601	1.8366	3.53597	0.736645	1.07723	1.12097	0.000166148	-1.62322	down		ENSOARG00000014138	0.242757	0.129173	2.5026	0.365042	1.89486	0.0320906	3.08864	up		ENSOARG00000010751	0.306174	0.106922	0.0679413	3.68853	0.837296	1.04229	0.0246251	3.5824	up		ENSOARG00000010462	31.959	35.2404	65.3692	110.581	68.7163	102.59	0.00284105	1.09516	up
ENSOARG00000006796	0	0	0.172762	1.70911	7.48915	5.78425	2.31569e-06	6.39182	up		ENSOARG00000014237	0	0	0.0846436	0.0483783	0.143233	0.0318997	Inf	up		ENSOARG00000010766	7.25623	9.85196	11.662	4.00593	7.08267	2.49744	0.0085473	-1.06911	down		ENSOARG00000010475	0	0.0926642	0	0.979744	0.768595	1.05503	0.00450907	4.91211	up
ENSOARG00000006797	0.288287	0.00696677	0.00758821	0.288019	0.457662	0.541116	0.00671449	2.03818	up		ENSOARG00000014277	0.0948378	0.211949	0.907419	0.440057	1.15481	0.00605338	2.43926	up		ENSOARG00000010820	0.0767465	0.0893382	0.26762	0.00936755	0.0249856	0	0.0166682	-3.66048	down		ENSOARG00000010493	8.53012	6.60151	8.33007	29.8341	23.2438	29.3367	3.96322e-14	1.81821	up
ENSOARG00000006809	8.31384	16.0844	7.49379	23.8355	28.2092	19.388	0.000662929	1.1245	up		ENSOARG00000014336	71.089	21.5031	102.56	101.469	105.574	0.00143379	1.14433	up		ENSOARG00000010845	72.472	93.5896	52.2974	38.1865	21.6931	29.9861	0.000446458	-1.25313	down		ENSOARG00000010518	0.571071	0.108185	0.508443	0.0168212	0.0224332	0.0905692	0.0108063	-3.19388	down
ENSOARG00000006831	0.0799229	0.259583	0.335752	0.442394	0.81837	0.875944	0.0402444	1.6188	up		ENSOARG00000014402	0.347328	0.0528049	2.18195	0.650198	1.20494	0.0164288	2.7421	up		ENSOARG00000010863	1.72675	1.17924	1.83072	3.5933	4.04007	4.31428	0.000226543	1.34927	up		ENSOARG00000010659	34.7268	24.4909	85.5684	172.815	82.3699	217.867	0.00952656	1.71495	up
ENSOARG00000006880	0.292401	0.333877	0.107751	0.0543856	0.014506	0.011713	0.00514168	-3.21807	down		ENSOARG00000014478	0.06808	0.193206	0	0	0	0.0246724	#NAME?	down		ENSOARG00000010939	1.81249	1.28527	1.60704	3.63822	5.34353	4.76982	1.86202e-07	1.56577	up		ENSOARG00000010676	4.37737	6.69242	6.84868	0.0312956	1.83641	2.05573	4.40682e-05	-2.19724	down
ENSOARG00000006885	0.196256	0.0199195	0.238659	0.438036	0.420606	0.830187	0.0403025	1.84632	up		ENSOARG00000014496	4.11838	2.95798	22.6206	13.0194	40.4454	0.00572834	2.83007	up		ENSOARG00000010959	3.54093	5.00656	6.13076	1.98316	1.97187	1.19582	0.000226547	-1.49835	down		ENSOARG00000010688	2.22283	121.366	35.3968	270.083	243.93	172.639	1.14159e-05	2.11029	up
ENSOARG00000006897	0.7788	0.943008	0.755238	2.14689	4.4574	3.41527	5.61546e-05	1.97294	up		ENSOARG00000014571	3.40094	2.35071	0.40663	0.045191	0.894002	0.00029933	-2.69333	down		ENSOARG00000011007	4.36344	4.07813	4.37581	11.2741	6.43009	8.78205	0.00371597	1.06693	up		ENSOARG00000010751	0	0.126184	0.316286	3.68853	0.837296	1.04229	0.0248167	3.66872	up
ENSOARG00000006959	6.19607	2.34187	4.21307	18.3427	17.9339	65.1265	0.0239875	2.94241	up		ENSOARG00000014611	2.16282	2.76371	1.37856	1.35888	0.758383	0.0266312	-1.08275	down		ENSOARG00000011059	0.985444	0.714602	0.896204	2.14864	1.22105	1.94712	0.00860866	1.05366	up		ENSOARG00000010771	0.122071	0.202346	0.420243	0.113863	0.0639369	0.0258132	0.0462004	-1.8575	down
ENSOARG00000006960	1.09377	1.35149	0.753543	3.21254	2.20822	1.50873	0.0213306	1.07883	up		ENSOARG00000014635	1.40165	0.902218	0.458838	0.203972	0.211756	0.0150214	-1.98502	down		ENSOARG00000011243	4.68774	2.43954	2.01927	12.0629	4.39888	7.30678	0.0315018	1.41321	up		ENSOARG00000010854	75.6848	94.0281	89.6216	405.361	226.062	184.079	0.00430398	1.66175	up
ENSOARG00000006971	0.274342	0.353708	0.311485	1.07901	1.18298	0.855406	0.000948258	1.69077	up		ENSOARG00000014710	40.8794	30.4631	84.6282	97.74	67.8133	2.58459e-05	1.21763	up		ENSOARG00000011340	0.400059	0.458947	0.276617	0.683628	0.931522	0.86419	0.0452489	1.15204	up		ENSOARG00000010939	0.881598	1.64184	1.08744	3.63822	5.34353	4.76982	6.25935e-12	1.92973	up
ENSOARG00000006980	13.8809	31.7763	16.0294	116.599	77.0129	42.4573	0.00550738	1.90194	up		ENSOARG00000014713	0.924208	0.859731	2.17201	1.42262	1.88913	0.0105808	1.02955	up		ENSOARG00000011453	37.1781	46.2984	14.3456	98.8507	82.4318	89.4468	1.40303e-08	1.50432	up		ENSOARG00000010944	3.20931	6.38699	4.80279	20.1132	17.3682	23.7164	2.25041e-07	2.0894	up
ENSOARG00000007199	5.84155	6.12476	4.17498	14.914	12.9058	9.21583	0.000154743	1.15978	up		ENSOARG00000014737	0.122465	0.228077	0	0	0	0.0247276	#NAME?	down		ENSOARG00000011505	0	0	0.0902523	0.787673	0.278063	0.0997886	0.0426414	3.65843	up		ENSOARG00000010959	3.25192	3.11217	4.18793	1.98316	1.97187	1.19582	3.31791e-05	-1.02732	down
ENSOARG00000007216	0	0	0	2.17164	3.98221	1.46158	6.09615e-06	Inf	up		ENSOARG00000014777	1.18802	1.10059	3.92368	3.74552	1.97473	0.00591681	1.48629	up		ENSOARG00000011535	0.084805	0	0	0.0724581	1.15958	3.66723	0.0410895	5.90336	up		ENSOARG00000011003	0.260877	0.308881	0.232267	0	0.0426997	0	0.0352581	-4.23244	down
ENSOARG00000007232	0.584432	0.175259	0.3671	0.996109	0.648403	1.23866	0.0375941	1.31189	up		ENSOARG00000014841	7.74403	5.72523	28.2239	30.564	20.665	1.13246e-08	1.96848	up		ENSOARG00000011541	0.234973	0.243133	0.270363	0.691516	0.386738	0.976861	0.039976	1.47085	up		ENSOARG00000011052	1.14977	1.08907	0.978182	0.0188151	0.0752767	0.0607828	3.21334e-05	-4.37806	down
ENSOARG00000007239	2.08583	2.76959	2.10059	5.4718	3.79325	7.19711	0.00100035	1.20139	up		ENSOARG00000014870	6.09012	6.74047	22.8637	11.6873	15.1555	0.0101977	1.36634	up		ENSOARG00000011568	0.106959	0.124507	0.0098894	0.92148	0.873439	0.196818	0.00383156	3.09632	up		ENSOARG00000011111	0.814938	0.55667	1.00463	2.54663	0.995274	1.63214	0.0457915	1.13262	up
ENSOARG00000007257	0.283401	0.3123	0.313303	0.947003	1.42684	0.941931	0.000571069	1.82573	up		ENSOARG00000014891	3.65532	2.23128	0.519919	0.977838	1.22024	0.00399669	-1.7143	down		ENSOARG00000011599	265.138	200.876	132.797	425.098	422.709	430.113	0.000123272	1.12426	up		ENSOARG00000011194	0.275276	0.456301	0	0	0	0	0.0378991	#NAME?	down
ENSOARG00000007271	1.21622	1.93506	0.690441	4.04982	3.0527	2.78095	0.00159663	1.32565	up		ENSOARG00000015038	7.10913	4.50651	19.5669	11.3144	10.3583	0.0330961	1.23878	up		ENSOARG00000011622	1.32631	1.54392	0.630674	4.24146	2.15897	2.71952	0.047979	1.41623	up		ENSOARG00000011243	4.41522	3.03053	2.84856	12.0629	4.39888	7.30678	0.0411695	1.21641	up
ENSOARG00000007292	0.175931	0.178566	0.0972468	0	0	0	0.0488161	#NAME?	down		ENSOARG00000015153	13.3513	14.2613	2.36695	3.0548	3.38133	1.68189e-11	-2.24316	down		ENSOARG00000011671	0.160791	0.0362269	0.161137	0.0354533	0.0295508	0.00954443	0.0421129	-2.24609	down		ENSOARG00000011416	0.199292	0.395811	0.360597	0.0757454	0.101016	0.0662725	0.0150965	-1.97216	down
ENSOARG00000007322	1.7267	3.67821	1.47683	10.0234	3.20649	5.88868	0.0436788	1.43922	up		ENSOARG00000015236	2.92816	2.46591	5.334	7.75622	6.75124	8.34179e-05	1.28447	up		ENSOARG00000011692	1.46813	1.75002	1.7462	3.18111	2.68998	4.0091	0.0163006	1.00796	up		ENSOARG00000011463	25.1506	14.6965	17.3922	65.3317	28.1367	42.179	0.0171178	1.25399	up
ENSOARG00000007375	0.129605	0	0.0358199	1.07031	0.308625	0.529554	0.00321781	3.48869	up		ENSOARG00000015249	0.566488	1.0456	3.37909	1.68849	1.78714	0.0263949	1.50439	up		ENSOARG00000011783	1.64306	1.4117	0.336387	0.225617	0.390041	0.21596	0.0168285	-1.98555	down		ENSOARG00000011518	0.12143	0.632606	0.129735	0.852466	0.938116	0.449358	0.0286384	1.34213	up
ENSOARG00000007405	22.5045	20.2392	14.7748	9.20931	4.0973	5.43757	7.36449e-07	-1.65477	down		ENSOARG00000015286	0.871615	0.861334	2.55297	1.20368	2.60106	0.0190847	1.28452	up		ENSOARG00000011857	25.17	27.3235	22.7337	50.9785	41.8315	102.503	0.0207543	1.39341	up		ENSOARG00000011548	2.68599	6.63031	4.47848	2.51737	2.33407	1.60067	0.0457008	-1.09207	down
ENSOARG00000007473	0.0629079	0.620256	0.198701	2.75199	1.44451	0.492472	0.0390217	2.38103	up		ENSOARG00000015333	2.52285	2.26094	6.11319	3.39177	7.41212	0.018418	1.2296	up		ENSOARG00000011993	1.278	1.17775	1.16016	2.99869	2.56495	2.16463	0.0015189	1.11797	up		ENSOARG00000011604	1.79428	2.82771	1.90599	4.58351	3.71864	6.48612	0.000661593	1.18074	up
ENSOARG00000007494	2.05791	3.23476	2.63744	5.36548	3.70787	8.12394	0.0156701	1.07478	up		ENSOARG00000015390	70.3518	157.814	48.978	21.3194	49.0437	0.0388671	-1.52179	down		ENSOARG00000012024	3.68234	1.5937	2.46934	1.60769	1.40631	0.719795	0.0314397	-1.02507	down		ENSOARG00000011614	0.817204	0.725684	0.212212	0.0752225	0	0.0540021	0.00740666	-3.75596	down
ENSOARG00000007520	7.07267	6.29667	6.90998	2.14372	2.00235	2.97314	8.88447e-09	-1.55288	down		ENSOARG00000015430	1.17988	1.12207	2.93572	2.97681	3.65773	0.0451667	1.46234	up		ENSOARG00000012108	40.9003	35.2672	35.2319	162.981	47.5812	109.238	0.0243503	1.54489	up		ENSOARG00000011642	0.148939	0.0391879	0.294679	0.0243727	0.016252	0.0131228	0.033831	-3.15454	down
ENSOARG00000007561	0.399715	0.341643	0.360488	0.563462	1.20231	1.2742	0.0167563	1.41887	up		ENSOARG00000015491	1.17981	1.0617	3.0854	1.64367	2.97039	0.0180195	1.1893	up		ENSOARG00000012217	0.278199	0.266271	0.00685927	0.00528212	0.00704437	0.00568803	0.00596257	-4.88657	down		ENSOARG00000011692	1.21284	1.11331	1.90486	3.18111	2.68998	4.0091	0.00315454	1.22817	up
ENSOARG00000007592	11.9381	8.39488	20.6039	36.8942	33.6336	32.9206	5.59213e-08	1.29667	up		ENSOARG00000015493	0	0.0875783	0.497092	0.371243	0.663761	0.0126897	3.54524	up		ENSOARG00000012230	0	0	0	0.224508	0.0142576	0.0690746	0.0353639	Inf	up		ENSOARG00000011756	18.637	51.3053	67.6397	15.1684	16.1652	12.9937	0.0214253	-1.62938	down
ENSOARG00000007600	1.6858	0.513313	0.754786	4.1088	3.16131	3.26574	6.22427e-08	1.79312	up		ENSOARG00000015583	1.14079	0.564674	0.230765	0.136779	0.138055	0.0354691	-2.3451	down		ENSOARG00000012234	4.6097	3.10664	2.76878	5.95227	7.85911	7.14313	0.0430671	1.0253	up		ENSOARG00000011843	0.121876	0.144302	0.130212	0	0	0	0.0175267	#NAME?	down
ENSOARG00000007668	0.0363759	0.0923015	0.100535	0.243568	0.303173	0.472114	0.0459913	2.10917	up		ENSOARG00000015677	0.391517	0.358791	0.809339	1.78023	1.24505	0.0273485	1.75783	up		ENSOARG00000012267	1.32861	0.968575	1.22099	2.57995	1.81974	2.77821	0.0376781	1.04706	up		ENSOARG00000012060	0.49704	0.409392	0.423291	1.08213	1.08237	1.97071	0.0226087	1.63831	up
ENSOARG00000007731	0.845959	0.738419	0.467608	0.135947	0.141012	0.146393	0.00636095	-2.3186	down		ENSOARG00000015768	2.81418	3.01549	2.01885	0.585843	1.27822	0.028962	-1.17248	down		ENSOARG00000012295	0.662936	0.315697	0.501505	4.32537	1.09875	5.15681	0.00346385	2.85727	up		ENSOARG00000012108	17.8413	40.4032	31.5037	162.981	47.5812	109.238	0.0132436	1.83983	up
ENSOARG00000007743	0.832845	1.44912	1.06687	0.554713	0.267579	0.177931	0.00558463	-1.77683	down		ENSOARG00000015815	4.74776	2.04714	1.35778	1.27218	0.929759	0.0317104	-1.52627	down		ENSOARG00000012307	9.35446	10.0446	9.51644	24.3761	21.259	22.0056	4.71377e-05	1.2456	up		ENSOARG00000012169	14.0395	14.7018	19.2803	3.14544	2.94831	4.6825	4.56996e-16	-2.15299	down
ENSOARG00000007826	35.0003	44.6076	44.3177	57.1179	106.154	107.007	0.00351955	1.08119	up		ENSOARG00000015843	0.30246	0.466731	0.599256	1.61786	1.65261	0.0498871	1.73495	up		ENSOARG00000012346	3.34967	2.844	3.23203	1.29876	1.79503	1.35787	0.00163323	-1.06359	down		ENSOARG00000012295	0.174814	0.620946	1.27627	4.32537	1.09875	5.15681	0.0135946	2.35797	up
ENSOARG00000007839	35.8448	29.841	41.3168	13.3184	24.3831	16.2169	2.99234e-05	-1.03155	down		ENSOARG00000015876	5.43986	3.40724	11.907	11.527	6.00586	0.0326643	1.14374	up		ENSOARG00000012363	3.1492	1.56601	0.848082	0.496343	0.0348387	0.0281308	0.0031819	-3.26189	down		ENSOARG00000012313	3.48894	2.33198	1.55316	8.24635	4.86323	3.70374	0.0311077	1.19829	up
ENSOARG00000007906	14.1279	27.194	10.7587	43.8336	35.0981	37.547	0.000219662	1.12281	up		ENSOARG00000015928	16.4244	20.0583	6.94774	9.23401	7.28566	7.96512e-06	-1.22831	down		ENSOARG00000012370	1.9905	0.988623	0.461332	2.27516	3.06445	6.93488	0.0354766	1.86997	up		ENSOARG00000012370	0.215555	1.2761	0.0822496	2.27516	3.06445	6.93488	0.00233844	2.95354	up
ENSOARG00000007929	43.1167	30.9854	48.3389	9.64438	17.2582	34.4362	0.0144853	-1.04485	down		ENSOARG00000016116	0.52887	0.771722	1.6757	1.02602	1.5094	0.034645	1.10653	up		ENSOARG00000012437	0.961495	1.7908	2.41807	8.48893	4.27278	9.43615	7.52103e-05	2.10559	up		ENSOARG00000012437	2.86335	2.86189	1.32433	8.48893	4.27278	9.43615	0.00080047	1.65789	up
ENSOARG00000007934	2.34629	0.0198452	2.0967	5.07973	3.07295	6.8987	0.00408114	1.70893	up		ENSOARG00000016231	2.51438	0.226419	8.58944	4.57456	9.46087	0.000311996	2.44587	up		ENSOARG00000012438	6.39672	16.9091	18.4825	35.4341	19.2242	60.3254	0.0294767	1.4621	up		ENSOARG00000012438	3.09246	7.76239	24.3944	35.4341	19.2242	60.3254	0.0427615	1.71002	up
ENSOARG00000007963	0	0	0	0.118098	0.251998	0.610434	0.00225787	Inf	up		ENSOARG00000016322	10.2506	6.10869	3.56497	3.82211	4.37953	0.00821365	-1.07096	down		ENSOARG00000012472	0.178713	0.0462298	0.176253	1.71356	1.17656	1.55293	0.000105393	3.48286	up		ENSOARG00000012472	0	0.300068	0.143589	1.71356	1.17656	1.55293	4.92897e-05	3.32401	up
ENSOARG00000007984	1.14173	0.907071	2.61311	8.50302	5.80672	7.47314	3.41447e-11	2.18408	up		ENSOARG00000016334	0.585329	1.64086	0.0551909	0.18401	0.416025	0.0265594	-2.36201	down		ENSOARG00000012549	0.191738	0.0247996	0	2.1843	0.0485507	2.41096	0.00813398	4.48132	up		ENSOARG00000012537	25.688	35.2847	54.6075	14.5061	9.21223	7.61015	0.000477461	-1.87429	down
ENSOARG00000007988	3.84898	3.56022	2.49436	10.529	12.1228	4.79408	0.0101573	1.43229	up		ENSOARG00000016361	10.6972	9.5356	20.6949	20.9121	20.7875	0.00010782	1.03225	up		ENSOARG00000012554	0	0	0.0633824	0.353864	0.0488195	0.210239	0.0191955	3.23504	up		ENSOARG00000012579	0.225359	0.124519	0.133763	0.475728	1.1656	2.38273	0.0121011	3.0542	up
ENSOARG00000007998	1.89632	2.02932	2.42302	0.374179	1.14528	0.502015	1.15095e-06	-1.69419	down		ENSOARG00000016470	2.20653	0.903166	16.4699	14.999	9.15041	9.25972e-08	3.11458	up		ENSOARG00000012579	0.129487	0.120585	0.0862008	0.475728	1.1656	2.38273	0.00509347	3.59964	up		ENSOARG00000012603	4.12039	2.36424	4.40222	6.06842	9.58708	6.68556	0.0163891	1.04227	up
ENSOARG00000008036	72.4101	76.041	56.0302	165.963	102.548	168.818	0.00045663	1.05645	up		ENSOARG00000016800	2.47678	1.87842	0.385201	0.403632	0.148144	0.000160471	-2.80588	down		ENSOARG00000012641	6.11627	6.35829	5.35269	14.9368	10.6682	11.1569	5.99342e-05	1.06754	up		ENSOARG00000012673	11.3685	14.8594	12.2115	30.9704	26.2181	26.9817	2.20324e-06	1.13511	up
ENSOARG00000008037	2.55687	1.36587	3.68951	1.15338	0.737042	0.828009	0.0143924	-1.52507	down		ENSOARG00000017049	5.42711	5.48413	1.58017	2.69212	1.98669	0.000363444	-1.39579	down		ENSOARG00000012984	0.189528	0.0735413	0.175238	0	0	0	0.0258937	#NAME?	down		ENSOARG00000012984	0.219903	0.303762	0.130525	0	0	0	0.0143189	#NAME?	down
ENSOARG00000008066	0.0204781	0.457264	0.747078	1.07867	1.46292	1.12218	0.0282146	1.54108	up		ENSOARG00000017169	3.87448	3.1252	1.30764	2.23932	0.896079	0.0203932	-1.24844	down		ENSOARG00000013004	0.0457234	0.0638703	0.0355117	0.390664	0.03647	0.319721	0.035325	2.39024	up		ENSOARG00000012993	0.737706	2.63855	1.10151	4.16483	4.55816	2.38259	0.00785359	1.31276	up
ENSOARG00000008075	4.36694	2.11063	4.47009	1.11392	1.10041	1.35502	0.000732306	-1.65985	down		ENSOARG00000017214	13.1214	6.37935	70.9751	57.1833	58.9345	1.17373e-20	2.66847	up		ENSOARG00000013007	39.0084	56.6668	51.9844	143.049	64.5299	104.903	0.0114575	1.09888	up		ENSOARG00000013067	0.171851	0.373651	0.317137	1.09292	0.536992	1.18682	0.000744744	1.71039	up
ENSOARG00000008077	0.487902	0	0	239.43	156.847	238.285	2.20688e-54	10.2994	up		ENSOARG00000017490	3.76662	4.8338	2.46259	1.82057	0.763843	0.0083243	-1.35346	down		ENSOARG00000013079	11.8025	17.6051	22.4558	8.82996	4.34203	4.09261	0.00214733	-1.57435	down		ENSOARG00000013171	1.83643	1.21927	1.69616	0.366519	0.387668	0.489954	0.00230313	-1.92933	down
ENSOARG00000008089	1.28436	0.512126	0.798678	0.174046	0.191151	0.275619	0.0022831	-2.06264	down		ENSOARG00000017521	2.39315	1.74012	12.2367	12.2414	7.62194	2.84357e-07	2.36616	up		ENSOARG00000013171	1.81944	1.53251	0.640078	0.366519	0.387668	0.489954	0.0200959	-1.6476	down		ENSOARG00000013183	3.14196	3.32254	1.49479	1.24516	1.26015	1.45496	0.0316181	-1.00516	down
ENSOARG00000008147	1.17644	0.875639	1.44507	0.256741	0.0622538	0.201069	0.00166302	-2.78787	down		ENSOARG00000017552	12.922	25.5926	8.55651	11.5393	8.75571	0.0447509	-1.00624	down		ENSOARG00000013175	3.18232	1.1032	1.58279	5.31867	3.1146	6.6636	0.00630359	1.39086	up		ENSOARG00000013293	1.74811	3.12419	2.81913	0.825806	1.41443	1.22056	0.00448618	-1.15137	down
ENSOARG00000008179	0.473339	0.370329	0.381559	0.924415	0.716211	1.25143	0.0305331	1.1964	up		ENSOARG00000017584	25.2303	29.6579	7.52506	16.5066	11.7343	0.00135995	-1.21247	down		ENSOARG00000013180	1.33825	1.8515	1.41179	0.637312	0.77494	0.61564	0.0424811	-1.16186	down		ENSOARG00000013398	8.0202	7.98869	7.04997	26.5769	19.2158	9.70128	0.0241827	1.27615	up
ENSOARG00000008233	57.5818	67.9081	73.6133	20.6475	29.2283	26.304	1.00326e-12	-1.42814	down		ENSOARG00000017695	1.76183	3.3885	0.697518	1.36798	0.198826	0.0132414	-1.7727	down		ENSOARG00000013216	0.986676	1.24877	1.32985	0.463946	0.588548	0.438672	0.017398	-1.24283	down		ENSOARG00000013455	9.17536	4.99639	5.99758	3.33555	3.07964	3.11603	0.00371293	-1.07539	down
ENSOARG00000008263	0.623245	1.09419	1.08006	0.172942	0.401113	0.186232	0.000535579	-1.92092	down		ENSOARG00000017704	10.8105	11.5048	3.51647	6.93477	6.16573	0.000131171	-1.02081	down		ENSOARG00000013569	4.62208	7.8415	8.49323	3.82457	2.65826	3.48796	0.00942398	-1.0609	down		ENSOARG00000013530	0.0130942	0.0310073	0.0116582	0.549618	0.0385781	0.238818	0.0327346	3.89949	up
ENSOARG00000008280	5.47006	3.94617	6.53098	9.75213	11.2222	13.22	5.33835e-05	1.05742	up		ENSOARG00000017833	14.5402	18.0439	5.8098	10.0791	5.94613	5.08922e-05	-1.16967	down		ENSOARG00000013606	0.0237252	0.0138089	0.00658089	0.111491	0.0811017	0.120058	0.0239708	2.86363	up		ENSOARG00000013534	11.6937	8.54351	17.9506	2.51614	7.50318	7.8424	0.0202711	-1.09561	down
ENSOARG00000008313	1.35146	1.46967	1.10275	7.95755	7.01107	9.03309	2.82458e-09	2.5716	up		ENSOARG00000017880	3.66536	2.93561	7.44103	6.20983	6.61675	0.00621446	1.02652	up		ENSOARG00000013636	34.5447	32.0433	63.5856	21.7511	20.9207	18.7356	0.0418844	-1.07831	down		ENSOARG00000013664	0.50555	0.698339	0.450108	1.17889	1.03434	2.02115	0.0409611	1.35617	up
ENSOARG00000008321	3.57715	1.90304	3.33911	1.02836	0.502863	1.09508	8.79906e-05	-1.78915	down		ENSOARG00000018044	4.70964	2.91645	11.1891	5.13969	10.3154	0.0293861	1.21261	up		ENSOARG00000013772	3.51183	2.34644	2.67384	6.30726	5.92072	5.03626	0.00199929	1.04054	up		ENSOARG00000013693	4.95943	4.92241	4.45926	12.053	14.6436	7.39818	0.00177406	1.25518	up
ENSOARG00000008358	1.53368	0.913685	0.755604	3.11057	3.59258	1.37831	0.0269583	1.29613	up		ENSOARG00000018173	35.9609	17.722	103.225	65.8714	95.3208	2.18898e-05	1.70651	up		ENSOARG00000013845	9.26822	8.07932	5.47815	19.6344	17.6977	15.2896	1.64238e-05	1.23464	up		ENSOARG00000013959	0.458138	0.104315	0.0784415	1.37542	0.674883	1.25755	0.00200941	2.37576	up
ENSOARG00000008396	0.568729	0.235174	0.372584	1.37281	1.42954	1.15429	0.0164865	1.70813	up		ENSOARG00000018475	52.9416	75.1221	28.2323	27.4408	37.1006	0.000293376	-1.05679	down		ENSOARG00000013959	0.470789	0.176784	0.18535	1.37542	0.674883	1.25755	0.0120152	2.02369	up		ENSOARG00000013999	1.07137	1.0873	1.53302	7.04416	2.6116	8.54124	0.00216426	2.30631	up
ENSOARG00000008432	4.37493	3.31015	3.82526	0.106524	1.37327	3.02069	0.0128974	-1.4064	down		ENSOARG00000018628	7.76026	5.58672	20.9782	15.2918	13.825	0.000391624	1.31772	up		ENSOARG00000013999	2.06112	3.66611	0.60373	7.04416	2.6116	8.54124	0.0268293	1.55944	up		ENSOARG00000014009	17.9776	8.72248	12.4972	68.7377	54.1268	60.6536	2.70512e-18	2.23412	up
ENSOARG00000008446	19.3011	13.7706	20.901	4.92503	10.3382	9.8349	0.000136909	-1.1497	down		ENSOARG00000018792	1.08156	0.77627	3.98675	2.26937	2.9057	0.0221991	1.71162	up		ENSOARG00000014005	82.3643	102.492	95.4908	15.739	32.7623	18.2901	2.29803e-16	-2.05238	down		ENSOARG00000014015	3.02017	4.13465	1.65259	8.27057	10.968	5.01438	0.00350414	1.46473	up
ENSOARG00000008486	0.276961	0	0.255153	0	0	0	0.0383849	#NAME?	down		ENSOARG00000018990	7.22943	9.96474	20.0773	15.0437	20.3511	0.0132243	1.09996	up		ENSOARG00000014009	38.3571	29.1383	25.8595	68.7377	54.1268	60.6536	8.96642e-05	1.00118	up		ENSOARG00000014078	0.218867	0.185101	0.779458	2.55572	0.46059	2.45459	0.0312272	2.21857	up
ENSOARG00000008517	3.36045	4.33369	2.62237	8.32986	6.27621	8.29849	5.68634e-05	1.1107	up		ENSOARG00000019043	27.7245	0.0320011	0.0290619	0	0.0312952	0.0177784	-9.44411	down		ENSOARG00000014043	1.19273	1.24156	0.750749	0.0097988	0.470445	0.495935	0.0135775	-1.68597	down		ENSOARG00000014138	0	0.440107	0	2.5026	0.365042	1.89486	0.00527807	3.43286	up
ENSOARG00000008586	5.45099	3.11804	3.78963	9.28159	9.70179	9.14843	0.000104222	1.14481	up		ENSOARG00000019098	1.11897	0.644662	3.8217	2.22304	2.86326	0.000567394	1.74494	up		ENSOARG00000014074	0.138528	0.188132	0.179316	0.946877	0.394618	1.10461	0.0207867	2.28767	up		ENSOARG00000014176	1.38637	3.41534	1.37369	4.95635	2.43754	6.0465	0.0321554	1.12223	up
ENSOARG00000008620	0.383046	0.275388	0.644015	23.1832	17.9292	73.3523	0.000178942	6.41011	up		ENSOARG00000019163	165.287	7.90983	257.761	189.718	404.191	0.0270655	1.69505	up		ENSOARG00000014078	0.296426	0.721491	0.0896975	2.55572	0.46059	2.45459	0.017968	2.34174	up		ENSOARG00000014229	1.68605	0.476729	1.45634	2.35346	1.79174	3.36246	0.0289094	1.05869	up
ENSOARG00000008637	0.848187	0.55436	0.554083	1.3596	1.1476	1.82238	0.00426669	1.10287	up		ENSOARG00000019333	0.0234059	0.0332121	0.331779	0.683814	0.722669	0.000134892	4.34512	up		ENSOARG00000014082	0.12617	0.385536	0.332472	1.78545	0.593034	4.46202	0.0322867	3.02108	up		ENSOARG00000014270	0.630371	0.895639	0.869923	2.54536	1.87783	6.09009	0.0203863	2.13256	up
ENSOARG00000008709	0.731813	0.846899	0.83171	0.341941	0.25244	0.138082	0.00139359	-1.75471	down		ENSOARG00000019361	0	0.226024	9.40797	9.76361	0.110519	0.00865807	5.84002	up		ENSOARG00000014126	1.48384	1.45693	0.773067	3.72624	1.80839	3.49024	0.00480009	1.31183	up		ENSOARG00000014283	3.99268	4.69516	2.19829	6.3762	9.03785	6.61269	0.000562892	1.01855	up
ENSOARG00000008794	15.661	8.0977	19.8178	2.68205	8.56099	6.67591	0.0148488	-1.32834	down		ENSOARG00000019492	1.76004	2.95176	4.22981	3.5446	6.9754	0.0457918	1.05415	up		ENSOARG00000014138	0.0915327	0.0532752	0.152336	2.5026	0.365042	1.89486	0.00270731	4.00795	up		ENSOARG00000014336	37.2843	26.5618	19.7123	102.56	101.469	105.574	1.67057e-15	1.89377	up
ENSOARG00000008800	158.432	48.3663	118.407	11.1212	22.988	6.40596	0.000289409	-3.047	down		ENSOARG00000019542	0.382642	0.603282	1.29663	0.931587	1.27336	0.0226028	1.23947	up		ENSOARG00000014154	0.0961495	0.335774	0.10668	0	0	0	0.048368	#NAME?	down		ENSOARG00000014402	0	0.0385524	0	2.18195	0.650198	1.20494	7.26733e-07	6.7088	up
ENSOARG00000008845	0.0761516	0.096615	0.0876942	0.186964	0.181338	0.292846	0.0445774	1.30121	up		ENSOARG00000019586	0	0	1.49098	0.497101	0.802777	0.0145194	Inf	up		ENSOARG00000014169	4.04872	4.05182	3.30447	7.73357	10.073	8.52885	2.19142e-05	1.22996	up		ENSOARG00000014405	0.326794	0.822221	0.618281	1.23332	0.735473	1.92196	0.0404315	1.13872	up
ENSOARG00000008862	93.808	85.9246	80.6703	213.556	202.881	162.994	1.79792e-07	1.11416	up		ENSOARG00000019760	1.39045	2.1279	5.20875	4.16199	3.27691	0.0086032	1.259	up		ENSOARG00000014176	1.63813	1.7723	1.86031	4.95635	2.43754	6.0465	0.00544916	1.36565	up		ENSOARG00000014413	53.3965	50.2786	60.9034	128.483	121.176	118.873	8.66406e-07	1.16831	up
ENSOARG00000008891	1.43514	1.71408	2.30974	0.393321	0.802708	1.30272	0.00385684	-1.17385	down		ENSOARG00000019840	0.444951	0.33673	1.14676	1.66954	1.5539	0.00953315	1.8876	up		ENSOARG00000014283	4.1212	3.91705	2.65377	6.3762	9.03785	6.61269	0.000220238	1.06983	up		ENSOARG00000014437	1.11498	1.03316	1.38115	2.61936	2.45181	2.94077	0.000446121	1.18734	up
ENSOARG00000008963	1.63737	2.7571	1.84574	5.61721	3.56026	3.68506	0.00390394	1.00633	up		ENSOARG00000019969	8.67416	7.15211	3.24761	3.86105	2.90076	0.0122687	-1.25358	down		ENSOARG00000014321	4.9643	5.07305	5.27057	13.5961	8.15171	11.4253	8.78339e-05	1.13443	up		ENSOARG00000014496	2.71371	8.66473	7.24832	22.6206	13.0194	40.4454	0.00845124	2.02968	up
ENSOARG00000008972	5.72392	2.14993	3.43362	33.8911	8.74206	110.859	0.0482373	3.7138	up		ENSOARG00000019977	5.09211	4.67219	1.28053	0.664638	0.886993	4.18006e-08	-2.37432	down		ENSOARG00000014358	11.7311	15.0197	9.14054	21.4377	29.8157	24.7258	1.21745e-05	1.10651	up		ENSOARG00000014563	0.0367432	0.271902	0.0490705	0.365273	0.297695	0.648288	0.0138444	1.86829	up
ENSOARG00000009007	0	0.0268355	0.00974306	0.165234	0.0419732	0.127094	0.0149915	3.15816	up		ENSOARG00000019993	0.623071	0.801227	2.55928	6.65892	2.43172	0.0396047	2.43933	up		ENSOARG00000014402	0.130962	0.0435568	0.145305	2.18195	0.650198	1.20494	0.000418158	3.67264	up		ENSOARG00000014621	0.169179	0.323578	0.185386	3.39246	1.04799	3.54996	9.35354e-05	3.56155	up
ENSOARG00000009097	1.58288	4.11652	1.36691	5.85727	8.36663	20.8231	0.0274443	2.26504	up		ENSOARG00000019994	14.0482	4.14533	0.864006	0.576129	0.952554	0.0115374	-3.52365	down		ENSOARG00000014422	9.36338	3.36797	3.50999	13.2974	10.2526	13.5001	0.000866338	1.22416	up		ENSOARG00000014652	0.0669942	0.145423	0.099412	0.476894	0.339929	0.407291	0.0260158	1.97644	up
ENSOARG00000009104	0.00978078	0.0297817	0.0108128	0.707302	0.174681	0.103435	0.0363406	4.26191	up		ENSOARG00000020028	3.94506	5.98274	17.8249	7.24591	17.1417	0.026298	1.50001	up		ENSOARG00000014429	0	0	0	0.386028	0.0214507	2.77129	0.0299209	Inf	up		ENSOARG00000014710	22.3316	34.7454	38.8321	84.6282	97.74	67.8133	1.66084e-07	1.388	up
ENSOARG00000009129	4.44184	6.01785	4.64744	2.30147	1.4166	2.09705	0.000253526	-1.41659	down		ENSOARG00000020040	29.871	32.5563	112.15	38.6044	106.1	0.0445709	1.45137	up		ENSOARG00000014478	0.0770097	0.0896446	0.170887	0	0	0	0.0314331	#NAME?	down		ENSOARG00000014713	0.802835	1.17787	0.586595	2.17201	1.42262	1.88913	0.000491631	1.0984	up
ENSOARG00000009143	798.511	490.644	413.709	310.894	231.191	222.966	0.00706812	-1.19412	down		ENSOARG00000020042	6.92882	10.0021	28.7089	14.4129	26.5598	0.00477623	1.45274	up		ENSOARG00000014496	2.914	9.90849	5.91324	22.6206	13.0194	40.4454	0.0074277	2.03357	up		ENSOARG00000014749	0.12686	0.025034	0.0188246	0.529371	0.124585	0.737714	0.0100497	3.03298	up
ENSOARG00000009196	32.7776	29.0421	23.1343	85.4069	40.4246	73.4939	0.00456955	1.19098	up		ENSOARG00000020057	32.242	59.4586	218.353	75.6131	224.957	0.0181761	1.91296	up		ENSOARG00000014563	0.0791697	0.0737272	0.158113	0.365273	0.297695	0.648288	0.0163802	2.07518	up		ENSOARG00000014777	1.12174	1.59378	1.85763	3.92368	3.74552	1.97473	0.0115721	1.08373	up
ENSOARG00000009204	21.1206	19.3408	13.5943	69.8095	25.0352	80.1376	0.0108701	1.65381	up		ENSOARG00000020058	67.6035	98.0154	299.509	170.329	213.498	0.00163899	1.4578	up		ENSOARG00000014582	9.23675	8.26843	11.8162	3.7021	5.1185	4.33962	8.34648e-05	-1.14353	down		ENSOARG00000014814	79.3545	145.819	117.371	276.951	151.476	262.707	0.00525624	1.01666	up
ENSOARG00000009208	18.5994	15.55	18.8978	7.34424	7.33542	7.03362	1.01216e-09	-1.3297	down		ENSOARG00000020059	62.5239	123.38	342.722	128.168	320.075	0.0324557	1.50244	up		ENSOARG00000014621	0.392567	0.169734	0.348449	3.39246	1.04799	3.54996	0.000312377	3.14982	up		ENSOARG00000014841	6.65306	9.63646	11.8703	28.2239	30.564	20.665	2.22754e-07	1.50209	up
ENSOARG00000009214	39.2145	37.679	25.8667	139.107	46.6903	126.925	0.0110366	1.56635	up		ENSOARG00000020064	10.7415	12.8356	30.2476	17.3261	33.1728	0.00798876	1.18538	up		ENSOARG00000014713	0.876206	0.766068	0.751031	2.17201	1.42262	1.88913	0.000745694	1.21816	up		ENSOARG00000014870	6.42992	9.84234	7.78063	22.8637	11.6873	15.1555	0.0100837	1.05362	up
ENSOARG00000009228	2.56667	2.11429	2.61816	1.04058	1.43203	1.0371	0.00599458	-1.09801	down		ENSOARG00000020071	45.8844	65.4079	211.694	72.37	187.12	0.0406004	1.49439	up		ENSOARG00000014749	0	0.212127	0.0404372	0.529371	0.124585	0.737714	0.0209124	2.48361	up		ENSOARG00000014878	169.861	257.702	344.65	67.5882	168.428	84.1798	0.00515732	-1.26769	down
ENSOARG00000009229	9.22515	4.73199	4.38645	18.2433	11.5743	16.8797	0.00434924	1.30687	up		ENSOARG00000020094	0.656447	1.38133	0.31722	0.00961483	0.147508	0.002768	-2.68173	down		ENSOARG00000014845	0.399848	0.607109	0.462927	1.38139	0.752747	1.23962	0.031712	1.21796	up		ENSOARG00000014898	30.3439	49.6291	71.7759	84.5814	124.866	123.273	0.000574831	1.13505	up
ENSOARG00000009230	135.832	134.406	145.651	56.7173	51.2865	63.5237	2.19429e-11	-1.31911	down		ENSOARG00000020215	7.46718	14.2105	2.93532	1.93031	2.59411	0.000754798	-2.12635	down		ENSOARG00000014870	7.04201	6.52227	9.10413	22.8637	11.6873	15.1555	0.00584998	1.14792	up		ENSOARG00000015118	0.201369	0.655665	0.29134	1.92772	1.23599	0.618766	0.0229942	1.72609	up
ENSOARG00000009288	34.9663	24.3019	3.55914	0.418769	0.203084	0.0204977	8.75358e-05	-6.64355	down		ENSOARG00000020224	0.0136264	0.0507551	0.256806	0.298575	0.0921804	0.0300163	2.74766	up		ENSOARG00000014878	304.741	260.081	204.941	67.5882	168.428	84.1798	4.01121e-05	-1.23994	down		ENSOARG00000015153	6.8044	6.12292	5.76969	2.36695	3.0548	3.38133	0.000743713	-1.08445	down
ENSOARG00000009296	11.5279	10.6098	9.12614	25.032	19.1343	28.1297	6.12132e-05	1.16811	up		ENSOARG00000020259	510.743	568.852	1306.49	918.561	1260.64	3.02742e-05	1.10048	up		ENSOARG00000014917	0	0	0.0605426	0.349665	0.0621763	0.251024	0.0340937	3.41284	up		ENSOARG00000015161	7.46476	9.05658	6.72817	0.0678638	4.52524	1.90005	0.00316107	-1.84416	down
ENSOARG00000009305	1.0958	0.464033	1.00283	0.0388732	0.190088	0.0418605	1.92325e-06	-3.28674	down		ENSOARG00000020265	0.00913294	0.612326	2.19787	0.635666	1.4923	0.0299126	2.22152	up		ENSOARG00000015038	7.90174	4.55839	4.34478	19.5669	11.3144	10.3583	0.00733036	1.32704	up		ENSOARG00000015180	0.925178	0.915575	0.713068	2.23707	1.70868	1.44539	0.0289707	1.08435	up
ENSOARG00000009308	2.30482	0.119966	2.058	9.15416	5.03105	10.3122	1.07787e-05	2.40659	up		ENSOARG00000020507	0.894202	0.658819	0.116338	0.0664933	0.0894843	0.00453953	-3.10234	down		ENSOARG00000015044	0.440021	0.0131337	0.0125183	1.70627	0.694227	2.90661	0.00186974	3.56596	up		ENSOARG00000015249	0.778341	0.632715	0.434407	3.37909	1.68849	1.78714	0.00129408	1.90161	up
ENSOARG00000009340	1.69289	1.69593	1.20311	3.19943	3.58624	4.42816	0.000257209	1.24558	up		ENSOARG00000020743	2.03559	2.18865	7.70715	3.29992	6.35561	0.0155059	1.45051	up		ENSOARG00000015118	0.325414	0.227283	0.144421	1.92772	1.23599	0.618766	0.00605553	2.47791	up		ENSOARG00000015262	10.3355	9.32985	20.0192	56.704	36.1912	26.1713	0.00560224	1.5959	up
ENSOARG00000009371	82.3461	39.5489	82.1568	27.569	25.0204	39.3977	0.00955434	-1.19318	down		ENSOARG00000020768	10.371	12.0775	30.863	18.8358	32.1626	0.00120492	1.27606	up		ENSOARG00000015124	0.614981	1.35295	0.325517	0.101232	0.199295	0.223215	0.0361128	-2.10151	down		ENSOARG00000015282	1.66705	1.24545	2.94338	0.850675	0.991518	1.02404	0.0346258	-1.02529	down
ENSOARG00000009469	20.0899	22.255	24.9484	2.99992	12.0701	8.47308	1.61461e-08	-1.56065	down		ENSOARG00000020795	8.76418	6.53626	2.33435	2.90561	3.08831	0.00315282	-1.47264	down		ENSOARG00000015249	1.61199	0.780891	0.555446	3.37909	1.68849	1.78714	0.033958	1.25681	up		ENSOARG00000015312	0.579132	1.06969	0.185623	2.47351	2.52523	4.61076	3.4943e-05	2.38569	up
ENSOARG00000009514	0.323873	1.27837	0.397828	2.24893	1.30681	1.43576	0.0253035	1.28417	up		ENSOARG00000020877	6.17224	4.43122	23.5417	10.3232	19.9212	0.0050117	1.75185	up		ENSOARG00000015319	16.4811	15.245	20.86	5.73895	6.57224	5.89861	2.87943e-08	-1.51669	down		ENSOARG00000015329	4.82487	3.4911	7.67839	1.63918	1.96859	3.31773	0.0146801	-1.20497	down
ENSOARG00000009583	183.444	176.622	185.049	85.2923	93.7491	89.31	3.44162e-08	-1.06372	down		ENSOARG00000020909	1.02145	1.83962	0.721423	0.374715	0.613311	0.0379949	-1.3299	down		ENSOARG00000015333	1.87065	2.76567	2.53001	6.11319	3.39177	7.41212	0.00330352	1.25318	up		ENSOARG00000015333	1.26742	3.4327	2.07348	6.11319	3.39177	7.41212	0.0056637	1.32159	up
ENSOARG00000009598	2.68373	2.34494	2.7347	5.93789	4.58464	6.79804	0.00241743	1.1162	up		ENSOARG00000020972	3.59225	0.174564	8.70334	5.53922	17.0543	0.0227403	2.45037	up		ENSOARG00000015357	0.285649	1.10612	0.75029	0.0896549	0.179349	0.246725	0.0169027	-2.04665	down		ENSOARG00000015357	1.40012	0.416441	0.891269	0.0896549	0.179349	0.246725	0.0033829	-2.39064	down
ENSOARG00000009632	0.129848	0.112965	0.0615209	0.447145	0.375463	1.62286	0.0402825	2.95857	up		ENSOARG00000020976	2.2774	2.2936	0.354316	0.902091	1.76897	0.0386788	-1.19595	down		ENSOARG00000015458	1.08823	0.680502	0.488954	0.192107	0.317686	0.281342	0.0338078	-1.48239	down		ENSOARG00000015458	0.897416	0.531275	0.94765	0.192107	0.317686	0.281342	0.0137652	-1.58297	down
ENSOARG00000009696	0.332635	1.83277	0.367732	3.39396	3.33812	3.24361	0.0057132	1.94009	up		ENSOARG00000021089	1.6678	1.60203	4.85661	2.24737	4.31686	0.0211048	1.21447	up		ENSOARG00000015491	0.794847	1.18798	1.32829	3.0854	1.64367	2.97039	0.00419274	1.22857	up		ENSOARG00000015483	0.0769606	0.546733	0.171301	0	0.0377902	0	0.0452776	-4.40086	down
ENSOARG00000009731	5.13143	3.97936	4.90797	1.95604	1.25283	1.13633	1.80249e-06	-1.72792	down		Ovis_aries_newGene_10001	0.385652	0.479591	1.10561	1.11702	2.21879	0.0101262	1.76492	up		ENSOARG00000015493	0.0232718	0.0541801	0.0774617	0.497092	0.371243	0.663761	0.00668673	3.30506	up		ENSOARG00000015491	0.785608	1.65813	0.821097	3.0854	1.64367	2.97039	0.00304572	1.2402	up
ENSOARG00000009742	17.5156	33.5192	21.5036	55.5853	42.5527	58.4271	3.79942e-05	1.07032	up		Ovis_aries_newGene_10103	19.885	54.4757	128.898	81.9963	118.917	0.000236596	1.56297	up		ENSOARG00000015616	0.636757	0.202154	0.181003	1.07686	0.863476	2.84214	0.0298457	2.26193	up		ENSOARG00000015493	0	0.191821	0.0480808	0.497092	0.371243	0.663761	0.0192264	2.67046	up
ENSOARG00000009791	19.6749	29.344	36.5148	91.231	101.43	77.9847	2.91756e-14	1.62206	up		Ovis_aries_newGene_11044	0.61958	0.174539	0.0528361	0.117439	0.0189655	0.0405622	-2.66556	down		ENSOARG00000015628	20.4364	19.6119	17.006	40.0193	38.6232	36.3844	2.98899e-05	1.03448	up		ENSOARG00000015499	0.400209	0.210601	0.39591	0	0.0655052	0.0176309	0.00666651	-3.59835	down
ENSOARG00000009845	45.4667	22.3737	53.9517	24.8156	17.3471	19.8491	0.0384414	-1.01417	down		Ovis_aries_newGene_11362	1.27466	1.70258	4.55061	4.84498	5.04921	0.000766244	1.68731	up		ENSOARG00000015638	2.55859	2.48491	1.4278	6.04082	3.88146	11.1435	0.0134922	1.72813	up		ENSOARG00000015616	0.100747	0.310864	0.135906	1.07686	0.863476	2.84214	0.00485361	3.12194	up
ENSOARG00000009911	2.6049	2.55377	2.49523	8.6814	3.5861	10.06	0.00766957	1.50364	up		Ovis_aries_newGene_11743	3.60353	2.05932	0.0572504	1.25978	0.554849	0.00110876	-2.1998	down		ENSOARG00000015677	0.6274	0.515532	0.300284	0.809339	1.78023	1.24505	0.0385413	1.43987	up		ENSOARG00000015628	24.8937	12.1396	20.0669	40.0193	38.6232	36.3844	2.64178e-05	1.01717	up
ENSOARG00000009941	0.458119	0.521341	0.667601	0.00619699	0.00826446	0.507164	0.0252574	-1.71315	down		Ovis_aries_newGene_12553	0.504362	0.912479	0.0243727	0.032504	0.0262456	0.000775916	-4.68139	down		ENSOARG00000015700	0.0815814	0.0542665	0.14224	0.12945	0.916307	1.05084	0.0157149	2.91127	up		ENSOARG00000015632	5.43126	7.31714	5.91471	16.0834	12.6379	16.3188	2.87584e-08	1.27463	up
ENSOARG00000009943	9.48011	7.84699	10.5571	2.77579	4.5447	3.81644	2.65692e-07	-1.36724	down		Ovis_aries_newGene_14042	4.80379	3.97337	8.74889	12.3315	12.101	4.59405e-05	1.32347	up		ENSOARG00000015815	2.37965	4.06973	2.369	1.35778	1.27218	0.929759	0.00194223	-1.28422	down		ENSOARG00000015677	0.271198	0.388701	0.470204	0.809339	1.78023	1.24505	0.00746418	1.76412	up
ENSOARG00000009959	1.05021	1.58651	1.35002	0.501513	0.814227	0.258286	0.045479	-1.3795	down		Ovis_aries_newGene_16534	0.325611	0.319866	1.21037	1.38819	0.782027	0.0376184	1.7986	up		ENSOARG00000015866	0.0467422	0.0544112	0.0518614	0.119811	23.0087	5.8488	0.0162184	7.58074	up		ENSOARG00000015679	8.98018	8.43482	6.25335	3.36187	3.49809	3.14282	0.0109054	-1.2385	down
ENSOARG00000009964	2.62758	2.11694	2.06841	0.465522	0.718217	0.766687	8.20486e-06	-1.84843	down		Ovis_aries_newGene_16858	0.00553164	0.00588688	0.0053462	0.192505	0.161197	0.0468389	4.37288	up		ENSOARG00000015870	0.127023	0.147864	0.493271	3.78045	0.603074	1.81148	0.0197607	3.00641	up		ENSOARG00000015689	1.05117	1.47386	1.05903	3.29997	1.54847	2.78582	0.0478725	1.09592	up
ENSOARG00000009973	23.8794	13.1356	21.2724	9.27955	7.8695	12.2269	0.00435831	-1.03167	down		Ovis_aries_newGene_16937	5.25444	6.1481	1.73766	2.35332	2.35713	0.00011481	-1.41568	down		ENSOARG00000015908	110.384	0.476493	51.5728	3.1865	0.492331	1.48553	0.0148696	-4.94137	down		ENSOARG00000015700	0.0676116	0.0960634	0.0601968	0.12945	0.916307	1.05084	0.00993713	3.22174	up
ENSOARG00000009990	13.5739	12.527	11.3841	4.03021	3.90081	6.73227	2.83143e-11	-1.39769	down		Ovis_aries_newGene_17570	200.134	195.447	531.383	468.608	532.434	2.83675e-07	1.36202	up		ENSOARG00000015948	15.9949	13.4032	7.99229	32.2754	14.4124	29.4327	0.0210915	1.05688	up		ENSOARG00000015737	277.917	167.265	367.124	87.5185	150.036	156.304	0.0127133	-1.0411	down
ENSOARG00000009999	0.269414	0.469771	0.351299	1.06696	1.10215	2.69639	0.00932937	2.11296	up		Ovis_aries_newGene_17807	0.0100078	0.0106505	0.203118	0.103194	0.166649	0.0205248	3.92789	up		ENSOARG00000015970	6.06419	5.95556	9.65423	3.62179	2.51438	2.46138	0.00241295	-1.32326	down		ENSOARG00000015768	3.21117	2.5848	4.14726	2.01885	0.585843	1.27822	0.00102051	-1.34646	down
ENSOARG00000010166	0.657673	1.03837	0.630123	2.74008	2.57537	1.18026	0.00675047	1.44503	up		Ovis_aries_newGene_18177	31.4507	18.9866	11.2427	9.85044	11.1311	0.00287376	-1.24026	down		ENSOARG00000016019	1.61476	1.042	0.545271	2.96927	1.32996	2.67262	0.0235748	1.15937	up		ENSOARG00000015775	3.78695	3.70971	3.75604	7.69382	5.60884	13.0976	0.0156696	1.23196	up
ENSOARG00000010189	0.297375	0.0452742	0.345188	4.77884	1.92966	2.87323	5.11955e-06	3.76116	up		Ovis_aries_newGene_19011	0.675736	0.978019	0.0261233	0.0348387	0.0281308	0.000478723	-4.80539	down		ENSOARG00000016116	0.801764	0.682034	0.567958	1.6757	1.02602	1.5094	0.0207	1.06272	up		ENSOARG00000015815	4.76561	2.81007	2.60135	1.35778	1.27218	0.929759	0.000963963	-1.50855	down
ENSOARG00000010199	0.300929	0.122174	0.670905	3.22398	1.85718	1.36458	0.000438303	2.5217	up		Ovis_aries_newGene_19924	6.14132	9.3046	2.27466	3.48383	2.89917	8.26142e-05	-1.42712	down		ENSOARG00000016231	1.13767	0.827707	0.691821	8.58944	4.57456	9.46087	3.33973e-08	3.11623	up		ENSOARG00000015928	30.7762	10.2295	18.5895	6.94774	9.23401	7.28566	0.0310825	-1.33838	down
ENSOARG00000010347	0.820843	0.343056	0.516001	1.36509	0.881511	2.32103	0.0236031	1.39813	up		Ovis_aries_newGene_19936	0.0346073	0.0368298	0.0334472	1.11515	1.04451	0.0448637	4.33804	up		ENSOARG00000016257	45.8975	35.2148	10.1436	3.78657	2.97486	6.22318	0.00286401	-2.77514	down		ENSOARG00000015980	1.65229	1.31189	0.683622	0.465218	0.524976	0.377653	0.0096946	-1.41078	down
ENSOARG00000010353	6.08302	6.17412	3.43605	9.21655	8.06211	15.1327	0.0171959	1.00312	up		Ovis_aries_newGene_19959	1.22573	2.1161	0.789757	0.035108	0.368527	0.0366905	-2.06533	down		ENSOARG00000016361	6.92113	7.98425	9.92822	20.6949	20.9121	20.7875	5.21461e-08	1.34135	up		ENSOARG00000016019	1.1506	1.19354	1.10601	2.96927	1.32996	2.67262	0.0147705	1.02064	up
ENSOARG00000010357	0.358139	0.159941	0.53846	0	0.0511697	0.0413174	0.0011469	-3.56436	down		Ovis_aries_newGene_209	0.294841	0.0241366	2.58653	1.22777	1.39265	0.000852475	3.43425	up		ENSOARG00000016443	0	0	0.0258618	0.199154	0.0265596	0.514699	0.0382125	4.79016	up		ENSOARG00000016228	1.45679	0.850926	1.15868	3.14677	1.88847	4.0971	0.00384688	1.40231	up
ENSOARG00000010377	1.13164	1.03243	0.674716	3.15579	3.6485	1.66248	0.00215392	1.53778	up		Ovis_aries_newGene_22873	0.113227	0.0177203	0.820733	0.974363	0.519884	4.71925e-07	3.5468	up		ENSOARG00000016470	1.35165	2.68196	6.34809	16.4699	14.999	9.15041	5.10878e-05	1.96284	up		ENSOARG00000016231	0.43154	0.916701	0.158206	8.58944	4.57456	9.46087	1.65062e-10	3.90842	up
ENSOARG00000010462	40.6661	40.3561	37.607	110.581	68.7163	102.59	1.6625e-05	1.20873	up		Ovis_aries_newGene_23983	0.125438	0.560671	0.0242465	0.0323357	0.0261097	0.0411992	-3.63939	down		ENSOARG00000016476	55.1416	42.755	20.7815	70.4933	113.923	112.637	0.000273048	1.35654	up		ENSOARG00000016257	13.5397	9.27919	18.5046	3.78657	2.97486	6.22318	0.000275907	-1.66641	down
ENSOARG00000010475	0	0	0.0713642	0.979744	0.768595	1.05503	0.000929118	5.25452	up		Ovis_aries_newGene_25036	67.1189	46.3455	11.1339	8.34752	22.1612	6.67196e-06	-2.04362	down		ENSOARG00000016491	0.310454	0.303102	0.288898	1.44607	0.639033	1.83362	0.00114322	2.13675	up		ENSOARG00000016361	7.26642	10.384	7.03187	20.6949	20.9121	20.7875	6.50443e-09	1.34073	up
ENSOARG00000010493	6.38073	4.82064	25.1524	29.8341	23.2438	29.3367	0.0211786	1.1399	up		Ovis_aries_newGene_25560	0.661027	0.127905	1.9166	2.86585	1.81372	0.0419305	2.4647	up		ENSOARG00000016505	18.459	23.4376	25.5633	9.96386	10.8433	11.0082	2.22589e-05	-1.07104	down		ENSOARG00000016470	2.37024	1.11833	1.24555	16.4699	14.999	9.15041	3.44231e-10	3.10951	up
ENSOARG00000010570	0.0240181	0.243777	0.0796567	0.964932	0.772114	0.854358	0.0022394	2.86228	up		Ovis_aries_newGene_26272	0.125845	0.303567	0.900033	0.551492	0.951734	0.0213303	1.89718	up		ENSOARG00000016571	0	0	0	0.223294	0.0525512	0.0282886	0.0426979	Inf	up		ENSOARG00000016476	51.3754	23.8443	60.6628	70.4933	113.923	112.637	0.00347294	1.13262	up
ENSOARG00000010634	0.0404001	0.0738092	0.0446627	0.0144274	0	0	0.0493761	-3.4829	down		Ovis_aries_newGene_27227	28.6286	29.474	64.421	77.4295	70.9671	2.60279e-06	1.28033	up		ENSOARG00000016786	235.045	263.479	356.153	143.948	100.678	161.583	0.00187753	-1.06325	down		ENSOARG00000016502	1.03155	0.953715	1.66797	0.489834	0.515459	0.671708	0.00250878	-1.11928	down
ENSOARG00000010659	45.0458	27.8757	45.3516	172.815	82.3699	217.867	0.0010187	1.95758	up		Ovis_aries_newGene_27401	1.32968	0.804823	2.05617	3.22418	3.51155	0.00455032	1.44454	up		ENSOARG00000016939	37.6002	15.8872	29.604	72.4145	71.886	59.8344	9.502e-07	1.31789	up		ENSOARG00000016573	2.47602	1.86558	2.92903	1.17304	1.34334	0.810086	0.0182267	-1.12105	down
ENSOARG00000010676	6.09938	3.55789	4.37903	0.0312956	1.83641	2.05573	0.00018957	-1.88988	down		Ovis_aries_newGene_28038	0.0359557	0.153059	0.326653	0.45417	0.606216	0.0210957	2.28566	up		ENSOARG00000016974	1.17202	0.392756	1.24127	5.34071	2.89351	7.79342	0.000311618	2.52346	up		ENSOARG00000016786	432.61	165.194	357.072	143.948	100.678	161.583	0.018636	-1.22634	down
ENSOARG00000010741	22.0902	14.6522	18.0386	8.06273	10.4963	9.15075	2.26436e-05	-1.02578	down		Ovis_aries_newGene_28434	3.99926	7.2135	2.7792	1.29257	2.13769	0.0098565	-1.4386	down		ENSOARG00000016979	0.176081	0.0819882	0.293048	0.992937	0.581848	0.712827	0.0270277	2.05795	up		ENSOARG00000016800	0.840688	1.59261	0.598794	0.385201	0.403632	0.148144	0.0344981	-1.68956	down
ENSOARG00000010751	0.263712	0.148701	0.0647859	3.68853	0.837296	1.04229	0.0242579	3.51108	up		Ovis_aries_newGene_28564	1.59783	0.786225	0.365309	0.597909	0.017881	0.0276816	-1.8718	down		ENSOARG00000017040	0.494967	0.172853	0.0109835	0.00845808	0.0112799	0.00910805	0.0460362	-4.50195	down		ENSOARG00000016974	0.391474	0.853832	0.990593	5.34071	2.89351	7.79342	9.95776e-05	2.84382	up
ENSOARG00000010771	0.369185	0.129446	0.474924	0.113863	0.0639369	0.0258132	0.00832937	-2.29269	down		Ovis_aries_newGene_29568	0.495686	0.218727	0.0116846	0.0934972	0.0754951	0.0204546	-2.58745	down		ENSOARG00000017049	5.33528	9.38922	9.712	1.58017	2.69212	1.98669	2.14632e-05	-1.95495	down		ENSOARG00000016979	0	0.145137	0.327413	0.992937	0.581848	0.712827	0.0156091	2.2834	up
ENSOARG00000010794	3.82818	2.66386	3.97336	0.955176	1.31365	1.6393	0.000385372	-1.4654	down		Ovis_aries_newGene_30918	0.90794	0.598561	3.02078	1.40845	2.23272	0.00834823	1.5543	up		ENSOARG00000017050	1.88446	1.4598	1.49668	2.94219	4.49535	4.91459	0.000106947	1.37119	up		ENSOARG00000017049	5.66232	4.45619	4.00107	1.58017	2.69212	1.98669	0.000415789	-1.17098	down
ENSOARG00000010860	5.88348	4.9427	5.07595	9.49386	13.3712	11.7139	0.000139915	1.07815	up		Ovis_aries_newGene_31105	0.0205952	0.0219179	0.378191	0.212364	0.364385	0.0220279	3.89915	up		ENSOARG00000017065	0.549579	0.497582	0.311659	1.86782	0.654055	1.41582	0.015177	1.56559	up		ENSOARG00000017065	0.127532	0.452996	0.391102	1.86782	0.654055	1.41582	0.00320002	2.02432	up
ENSOARG00000010867	1.90199	1.42687	1.91983	3.3666	2.93411	6.4238	0.018595	1.23293	up		Ovis_aries_newGene_33170	0.164991	0.337667	0.0245323	0.0163584	0.0264175	0.0117599	-3.48902	down		ENSOARG00000017076	9.88435	7.97207	7.24598	3.92102	2.85593	3.86506	0.0102858	-1.21405	down		ENSOARG00000017151	2.12706	1.67356	1.44172	0.131371	0.283014	0.05441	3.79182e-08	-3.47779	down
ENSOARG00000010939	1.30283	1.09939	2.22743	3.63822	5.34353	4.76982	1.25028e-07	1.52779	up		Ovis_aries_newGene_36258	0.0560929	0.507409	1.0978	0.704916	1.0946	0.0498596	1.77887	up		ENSOARG00000017086	0.526262	0.306303	0.656885	0	0.112435	0	0.00597652	-3.71531	down		ENSOARG00000017214	9.68934	7.87083	7.90728	70.9751	57.1833	58.9345	2.93357e-30	2.88295	up
ENSOARG00000010944	9.4057	1.08613	14.5075	20.1132	17.3682	23.7164	0.00411482	1.24815	up		Ovis_aries_newGene_36395	0.369892	0.0715721	0.0108331	0.0144473	0.0116656	0.0362604	-4.1781	down		ENSOARG00000017094	7.21422	5.26344	4.67858	12.8487	10.0149	19.8192	0.00258319	1.33809	up		ENSOARG00000017249	10.971	3.41071	10.5863	16.4737	22.7523	13.9973	0.013165	1.09973	up
ENSOARG00000010957	9.04476	7.07497	8.7586	3.9768	4.59506	3.49784	0.000169651	-1.08445	down		Ovis_aries_newGene_3689	0.424653	0.169472	1.08761	1.55993	0.552445	0.0313767	1.83504	up		ENSOARG00000017131	15.729	19.4469	28.6685	10.5215	9.73234	9.46643	0.00981019	-1.09505	down		ENSOARG00000017398	32.7279	14.1477	17.5223	92.1316	94.654	114.539	1.14108e-18	2.23106	up
ENSOARG00000011009	5.64035	4.45924	5.54161	16.4442	13.9693	20.3709	1.32028e-11	1.65683	up		Ovis_aries_newGene_37699	0.173726	0.171188	1.16288	0.845914	0.595986	0.00240781	2.32917	up		ENSOARG00000017179	0.211965	0.170821	0.0542722	1.18415	0.427315	0.540061	0.0143506	2.34369	up		ENSOARG00000017432	0.660186	0.521111	0.440839	2.17419	0.702375	1.67233	0.017702	1.49507	up
ENSOARG00000011051	53.6451	42.0155	66.8118	16.9178	30.4855	34.4404	0.00110103	-1.03421	down		Ovis_aries_newGene_38233	0.445947	1.46331	0.0359164	0.287394	0	0.0182157	-3.15178	down		ENSOARG00000017209	0	0	0	0.340553	0	0.261945	0.00277482	Inf	up		ENSOARG00000017449	0.184516	0.305856	0.386059	0.115494	0.027181	0	0.010816	-2.59991	down
ENSOARG00000011053	1.38939	0.904184	1.3101	2.43707	1.56668	3.43365	0.0179739	1.00227	up		Ovis_aries_newGene_38622	0.796443	0.524699	0.0366544	0.0488832	0.0394712	0.00707857	-3.99649	down		ENSOARG00000017214	16.8136	12.4057	10.7235	70.9751	57.1833	58.9345	6.06286e-18	2.2551	up		ENSOARG00000017490	6.034	9.01647	8.64094	2.46259	1.82057	0.763843	1.59208e-09	-2.22168	down
ENSOARG00000011056	0.485268	0.738803	0.23247	0.231061	0.0192593	0.155511	0.0446482	-1.87886	down		Ovis_aries_newGene_38723	1.3511	1.46846	0.314875	0.988057	0.229372	0.0196881	-1.47304	down		ENSOARG00000017316	2.72994	0.62788	1.80758	0.865276	0.363746	0.303838	0.04145	-1.72445	down		ENSOARG00000017538	9.49754	6.08109	8.38339	17.3496	14.6914	17.9718	0.00180242	1.06719	up
ENSOARG00000011072	286.495	296.672	307.855	93.7376	80.0556	88.7593	2.22801e-16	-1.80322	down		Ovis_aries_newGene_4088	1.3396	1.21929	0.0170354	0.454376	0.660402	0.0365229	-1.78083	down		ENSOARG00000017398	21.2027	23.7559	33.2708	92.1316	94.654	114.539	5.49516e-14	1.9543	up		ENSOARG00000017725	1.20952	0.589681	0.918511	3.53651	1.50225	3.21588	0.0147653	1.61064	up
ENSOARG00000011082	0.489039	0.339181	0.396468	2.45955	2.89193	1.48883	6.02303e-07	2.44188	up		Ovis_aries_newGene_41422	0.25169	0.535706	0	0	0	0.0101914	#NAME?	down		ENSOARG00000017432	0.948324	0.404769	0.175364	2.17419	0.702375	1.67233	0.0291499	1.61877	up		ENSOARG00000017739	0.979095	1.29174	1.91778	1.59649	4.31318	4.4033	0.0356722	1.29964	up
ENSOARG00000011110	1.69611	0.891771	1.79905	0.634351	0.909662	0.705134	0.0120964	-1.00664	down		Ovis_aries_newGene_41546	0.219693	0.668006	0	0.0809047	0.0653272	0.0271741	-3.19953	down		ENSOARG00000017441	4.32474	5.24198	5.45364	1.99735	2.867	2.3546	0.000725478	-1.0423	down		ENSOARG00000017833	15.3476	10.9861	19.7763	5.8098	10.0791	5.94613	0.0019279	-1.0734	down
ENSOARG00000011164	1.69689	0	1.70539	0.0459079	0.0612238	0	0.00936904	-5.02718	down		Ovis_aries_newGene_42066	1.91573	1.35917	0.334299	0.360093	0.394603	0.000260376	-2.183	down		ENSOARG00000017480	20.3614	26.2711	32.7508	11.4903	13.1982	12.4294	0.000716485	-1.08641	down		ENSOARG00000017973	1.65262	1.17905	1.75434	5.0083	1.99751	4.01547	0.0147538	1.27315	up
ENSOARG00000011243	3.53621	1.7678	2.27558	12.0629	4.39888	7.30678	0.0138187	1.61079	up		Ovis_aries_newGene_42140	1.00651	0.909467	0	0	0	3.61518e-07	#NAME?	down		ENSOARG00000017490	8.27071	5.92613	4.43184	2.46259	1.82057	0.763843	1.31187e-05	-1.84912	down		ENSOARG00000018032	3.83449	7.83164	6.05981	3.8355	2.41634	2.20448	0.022227	-1.06153	down
ENSOARG00000011304	6.30846	1.97985	6.07937	1.40802	2.619	0.718211	0.0191633	-1.63973	down		Ovis_aries_newGene_42187	1.27732	0.890612	0.23413	0.425784	0.229202	0.046767	-1.8807	down		ENSOARG00000017498	0.156688	0.182396	0.0632176	4.80735	0.17854	3.66961	0.00584441	4.46328	up		ENSOARG00000018044	3.19828	2.44803	6.20322	11.1891	5.13969	10.3154	0.0256935	1.17719	up
ENSOARG00000011340	0.299632	0.512496	0.33738	0.683628	0.931522	0.86419	0.0232846	1.06765	up		Ovis_aries_newGene_42967	0.0315124	0.0335361	1.5228	1.29974	1.73821	0.000127293	5.53956	up		ENSOARG00000017509	10.6243	10.6656	20.0983	4.61148	7.26817	6.18659	0.0253558	-1.19233	down		ENSOARG00000018347	8.14408	14.3243	4.30853	15.2538	22.2554	20.123	0.00181856	1.10486	up
ENSOARG00000011381	4.44703	2.41878	5.98652	1.60519	2.58407	1.60581	0.0203454	-1.19157	down		Ovis_aries_newGene_46319	0.0118533	0.0126145	1.87877	0.0152779	0.715503	0.0463039	6.15675	up		ENSOARG00000017538	8.67749	11.4099	4.13179	17.3496	14.6914	17.9718	0.00297159	1.07857	up		ENSOARG00000018645	0.675278	0.557253	0.346158	1.26577	1.12538	1.84984	0.0322465	1.42753	up
ENSOARG00000011401	1.3094	1.82491	1.25311	3.82111	3.51363	2.23587	0.0152265	1.08746	up		Ovis_aries_newGene_46808	0.379258	0.887952	0.0733088	0	0	0.0256898	-4.6774	down		ENSOARG00000017626	0.289082	0.588896	0.935499	0.0411657	0.274498	0.110823	0.0482788	-2.09011	down		ENSOARG00000018691	4.09959	3.37809	3.77331	8.21017	7.87532	7.36941	0.00057315	1.06526	up
ENSOARG00000011416	0.291644	0.931089	0.240346	0.0757454	0.101016	0.0662725	0.034321	-2.62809	down		Ovis_aries_newGene_47017	0.73034	1.47121	0.0504183	0.302576	0.407196	0.035732	-2.13241	down		ENSOARG00000017700	1.30356	1.31388	0.652611	2.8116	1.35856	2.96915	0.0325649	1.15718	up		ENSOARG00000018736	2.37398	2.50193	3.22851	7.22321	6.30248	6.806	0.00100485	1.33228	up
ENSOARG00000011417	1.43416	2.59243	1.42694	3.45098	5.57807	3.70304	0.00221012	1.18257	up		Ovis_aries_newGene_49036	36.3033	41.8343	15.278	14.7918	25.7716	0.000872166	-1.07888	down		ENSOARG00000017739	1.01262	0.799875	0.374508	1.59649	4.31318	4.4033	0.00139708	2.26854	up		ENSOARG00000018816	0	0.0828782	0.0155804	0.579889	0.0343713	0.971368	0.0172733	4.00324	up
ENSOARG00000011429	0.00959075	0.00973438	0.0530134	0.385311	0.685147	0.00922047	0.0345341	3.86248	up		Ovis_aries_newGene_49552	0.57267	0.55866	0.166042	0.0123021	0.208601	0.0303311	-2.13916	down		ENSOARG00000017746	0.141694	0.0235631	0.0224589	0.778272	0.0230649	0.707711	0.0389271	3.05406	up		ENSOARG00000019052	0.623419	1.23022	0.851077	2.73917	1.67345	2.35644	0.0137485	1.32738	up
ENSOARG00000011453	24.876	18.7734	18.744	98.8507	82.4318	89.4468	4.3086e-22	2.07671	up		Ovis_aries_newGene_50052	0.284819	0.289932	0.0119683	0.0319225	0.012888	0.00354898	-3.93373	down		ENSOARG00000017779	609.429	0.669147	0.521828	0	0.178636	0	0.0220437	-11.6745	down		ENSOARG00000019098	1.96549	1.11129	0.619362	3.8217	2.22304	2.86326	0.00270489	1.27595	up
ENSOARG00000011529	0.134056	0.120945	0.329334	0.0664906	0.0177347	0	0.0291976	-2.8223	down		Ovis_aries_newGene_50564	0.217754	0.0772461	0.561211	4.02289	4.91024	0.0130249	4.40217	up		ENSOARG00000017815	6.13878	10.719	12.7541	5.63069	5.55477	3.21166	0.0291013	-1.02959	down		ENSOARG00000019163	37.0592	2.59061	7.26459	257.761	189.718	404.191	2.94837e-09	4.1883	up
ENSOARG00000011548	4.24295	3.47517	5.90781	2.51737	2.33407	1.60067	0.0013165	-1.11764	down		Ovis_aries_newGene_5091	0.868284	0.517466	0.033567	0.0447658	0.0361465	0.00391693	-4.19277	down		ENSOARG00000017834	0.642876	0.748353	0	0	0	0	0.048803	#NAME?	down		ENSOARG00000019237	1.19607	1.48787	0.957065	2.20751	2.18569	3.69779	0.00827331	1.15223	up
ENSOARG00000011558	0.733986	0.441468	0.360635	0.16989	0.0647342	0.0261351	0.00416902	-2.59104	down		Ovis_aries_newGene_51319	0.342898	2.31116	4.05048	3.56848	3.52905	0.00460024	1.48676	up		ENSOARG00000017860	14.7557	23.2778	22.4339	9.77404	7.16412	8.92794	0.000200483	-1.21102	down		ENSOARG00000019239	0.130706	0.866644	0.721508	0.0385003	0.20538	0.103647	0.0313728	-2.30939	down
ENSOARG00000011568	0.102361	0.190472	0.254613	0.92148	0.873439	0.196818	0.0351899	1.82836	up		Ovis_aries_newGene_51552	1.01933	1.63405	0.473872	0.798274	0.0268572	0.0292489	-1.61606	down		ENSOARG00000018044	4.23221	4.22433	1.69911	11.1891	5.13969	10.3154	0.00386369	1.42622	up		ENSOARG00000019333	0	0.157611	0.0455838	0.331779	0.683814	0.722669	0.000241022	3.08959	up
ENSOARG00000011614	2.38726	1.31127	1.273	0.0752225	0	0.0540021	1.06858e-07	-5.30321	down		Ovis_aries_newGene_52035	1.59783	2.08441	4.50825	3.37708	4.95304	0.00438561	1.21117	up		ENSOARG00000018119	0.151383	0.154192	0.0209952	0.792223	0.301865	0.417846	0.0358393	2.25867	up		ENSOARG00000019334	0	0.354582	0.31996	1.11736	0.490175	1.21905	0.0112189	2.06912	up
ENSOARG00000011616	37.6001	34.7217	39.4254	18.5953	18.0947	12.3696	4.88797e-08	-1.22684	down		Ovis_aries_newGene_52629	0.405287	0.431315	0.106827	0.0237446	0.0191728	0.0186431	-3.06079	down		ENSOARG00000018347	7.01914	9.05889	9.36802	15.2538	22.2554	20.123	0.00276773	1.19289	up		ENSOARG00000019361	23.4146	18.4821	20.9709	9.40797	9.76361	0.110519	5.09544e-06	-1.69307	down
ENSOARG00000011714	0.618872	0.603014	0.465236	0.154705	0.206319	0.0713974	0.0383295	-2.0027	down		Ovis_aries_newGene_53933	0.288333	0.526028	0.0398096	0	0.0428688	0.0313301	-3.88682	down		ENSOARG00000018472	0.00748833	0.165622	0.21602	0.00639809	0.00853265	0.00688976	0.020137	-4.16329	down		ENSOARG00000019367	0.992788	0.669572	1.9916	0.00925415	0.0123416	0.528161	0.00519615	-2.73959	down
ENSOARG00000011756	63.1407	74.0906	61.4867	15.1684	16.1652	12.9937	1.29932e-27	-2.20443	down		Ovis_aries_newGene_55906	0.539585	0.550311	0.043458	0.0289783	0.140393	0.0189423	-2.95518	down		ENSOARG00000018605	0.106504	0.137753	0.118168	0	0.0269682	0.0108879	0.0276253	-3.24435	down		ENSOARG00000019492	1.29936	1.75823	3.52568	4.22981	3.5446	6.9754	0.0272899	1.16703	up
ENSOARG00000011783	2.37736	1.12098	2.29709	0.225617	0.390041	0.21596	1.34328e-06	-2.84359	down		Ovis_aries_newGene_56645	0	0	0.23413	0.416322	0.924448	0.0457056	Inf	up		ENSOARG00000018645	0.758366	0.30795	0.391359	1.26577	1.12538	1.84984	0.0376129	1.56725	up		ENSOARG00000019622	3.08687	0.572229	1.38805	0.183688	0.0918639	0.630498	0.0434495	-2.47704	down
ENSOARG00000011803	17.5574	17.2255	20.8179	5.46914	8.61484	7.74489	4.84269e-12	-1.39183	down		Ovis_aries_newGene_56799	0.0176665	0.018801	0.887859	1.20684	0.367726	0.000188404	5.48837	up		ENSOARG00000018739	0.417563	0.0747805	0.320743	0	0.0365997	0	0.012323	-4.45345	down		ENSOARG00000019729	2.26524	3.19056	4.52846	7.42891	5.26795	11.7593	0.0119824	1.29501	up
ENSOARG00000011857	31.0945	30.8502	24.3596	50.9785	41.8315	102.503	0.0478079	1.13386	up		Ovis_aries_newGene_57438	0.14794	0.148694	1.44569	1.15468	0.316489	0.0220904	2.71267	up		ENSOARG00000018792	1.39414	0.894235	0.85233	3.98675	2.26937	2.9057	0.0170187	1.57298	up		ENSOARG00000019830	1.08332	1.25594	0.843952	2.94169	1.88398	2.38028	0.0270659	1.18372	up
ENSOARG00000011905	2.74401	3.61844	3.00964	1.15739	1.38917	0.997064	0.00246744	-1.44314	down		Ovis_aries_newGene_57879	0.0252017	0.0268202	4.33552	2.53366	4.64246	1.28989e-10	7.19871	up		ENSOARG00000018816	0	0.0526704	0.0502022	0.579889	0.0343713	0.971368	0.0180506	3.93971	up		ENSOARG00000019840	0.103818	0.507053	0.19642	1.14676	1.66954	1.5539	5.84891e-05	2.4341	up
ENSOARG00000011909	0.212377	0.0615877	0.050311	1.13764	0.650221	1.07922	0.000100446	3.10195	up		Ovis_aries_newGene_58064	16.6397	15.2968	69.0262	32.6378	33.1341	0.0430734	1.4912	up		ENSOARG00000018832	12.3488	13.171	14.7642	6.64627	5.43255	6.68828	5.93955e-05	-1.08653	down		ENSOARG00000019925	0.0294563	0	0.0262259	1.95221	0.086784	0.724103	0.0203223	5.65236	up
ENSOARG00000011945	17.8799	13.4141	15.7121	5.78221	9.95219	7.96945	2.71188e-06	-1.03109	down		Ovis_aries_newGene_58246	0.0493132	0.0524802	1.14384	0.254243	0.872484	0.0209354	3.89209	up		ENSOARG00000019043	31.7692	16.3526	11.9634	0.0290619	0	0.0312952	1.65565e-13	-9.92588	down		ENSOARG00000019977	3.28048	2.37054	4.60286	1.28053	0.664638	0.886993	5.69803e-05	-1.84701	down
ENSOARG00000011955	35.692	17.9955	38.5376	14.3926	11.5033	15.4063	0.00764349	-1.20097	down		Ovis_aries_newGene_58622	0.0120673	0.0128423	0.361546	0.482166	0.113031	0.00353194	4.6752	up		ENSOARG00000019052	0.662677	0.688008	0.675638	2.73917	1.67345	2.35644	0.00461426	1.75958	up		ENSOARG00000019993	0.749606	1.04891	0.637062	2.55928	6.65892	2.43172	0.016607	2.25919	up
ENSOARG00000011985	3.70534	4.24834	2.61708	11.3638	4.16663	9.56539	0.0242237	1.2089	up		Ovis_aries_newGene_59202	0.0174753	0.371951	1.03026	1.28388	0.782056	0.0194212	2.40871	up		ENSOARG00000019098	0.618596	1.96086	1.31989	3.8217	2.22304	2.86326	0.00262764	1.20755	up		ENSOARG00000020028	9.83764	2.14566	4.84038	17.8249	7.24591	17.1417	0.0336009	1.33599	up
ENSOARG00000012020	0.946725	1.86741	1.63904	3.23735	2.36075	3.72656	0.0139366	1.02604	up		Ovis_aries_newGene_59903	0.00322357	0.418532	0.641794	0.764504	0.536787	0.00865134	1.62192	up		ENSOARG00000019103	0.148323	0.138126	0.0987401	0	0	0	0.0316958	#NAME?	down		ENSOARG00000020031	10.5674	8.43826	9.91904	26.7836	9.89519	26.9255	0.032613	1.14296	up
ENSOARG00000012061	0.420263	1.18488	0.523602	1.66757	2.93874	1.63539	0.00527708	1.51231	up		Ovis_aries_newGene_61406	0.178126	0.568696	0	0.0459179	0	0.01242	-4.61666	down		ENSOARG00000019150	5.48814	5.36818	9.31986	2.40968	3.45681	3.46449	0.0142015	-1.10718	down		ENSOARG00000020058	107.713	76.2041	96.812	299.509	170.329	213.498	0.000515359	1.29143	up
ENSOARG00000012169	18.9087	9.75761	18.4077	3.14544	2.94831	4.6825	8.49259e-06	-2.17097	down		Ovis_aries_newGene_62056	0.656097	0.859362	0.0487771	0.0650503	0.0525254	0.0131979	-3.779	down		ENSOARG00000019163	7.26807	1.55491	0.784612	257.761	189.718	404.191	7.88622e-16	6.5171	up		ENSOARG00000020094	1.30212	6.93198	1.29008	0.31722	0.00961483	0.147508	0.0445326	-4.3217	down
ENSOARG00000012216	0.157152	0.119629	0.0434333	0.280605	0.982333	1.13313	0.0119625	2.856	up		Ovis_aries_newGene_62218	1.37684	0.710431	0.120971	0.250958	0.289484	0.0107004	-2.25826	down		ENSOARG00000019217	6.32101	9.08769	2.7662	17.8805	18.0207	18.7911	1.41009e-06	1.62305	up		ENSOARG00000020147	1.45689	1.32934	1.01152	2.54923	2.2971	2.9571	0.0135257	1.04223	up
ENSOARG00000012256	4.46945	5.87626	3.82848	1.54854	2.38939	1.63908	1.33635e-06	-1.38683	down		Ovis_aries_newGene_62634	0.0132923	0.0141459	0.616639	0.171326	0.415016	0.00150094	4.86768	up		ENSOARG00000019316	230.928	0.349858	0.301705	0.122281	0.130462	0.111926	0.0490613	-9.24719	down		ENSOARG00000020227	0.0828855	0.294412	0.184489	3.3875	0.976788	1.08448	0.0119199	3.28737	up
ENSOARG00000012272	119.243	122.511	132.968	27.9057	34.2052	46.243	2.63782e-15	-1.83353	down		Ovis_aries_newGene_64002	0.0186437	0.019841	0.108112	0.480603	0.543293	0.0103981	4.27861	up		ENSOARG00000019333	0	0.0102733	0.0489593	0.331779	0.683814	0.722669	3.86365e-06	4.84332	up		ENSOARG00000020446	1.40804	2.52758	0.0134798	0.0111491	0.22303	0.0120058	0.029932	-4.00883	down
ENSOARG00000012295	0.432573	0.40978	0.414452	4.32537	1.09875	5.15681	0.00217762	3.03271	up		Ovis_aries_newGene_64036	1.07838	0.491845	0.0893342	0.0397128	0.256531	0.0302597	-2.62757	down		ENSOARG00000019334	0.292524	0.440671	0.152735	1.11736	0.490175	1.21905	0.0410735	1.70471	up		ENSOARG00000020478	0.239137	0.579151	0.377434	1.23269	0.864669	1.61186	0.00294937	1.63405	up
ENSOARG00000012299	10.098	5.25095	8.14571	2.65107	3.87591	2.91686	0.000544539	-1.35777	down		Ovis_aries_newGene_68010	0.00552061	0.00587515	0.843015	0.362896	0.436662	1.57665e-06	6.58552	up		ENSOARG00000019482	0.697579	0.360903	0.257993	0.0882989	0.0294394	0.0237711	0.0146989	-3.17564	down		ENSOARG00000020542	0.745274	1.25246	1.15585	3.32828	2.14851	3.31715	0.0054286	1.48351	up
ENSOARG00000012313	1.62454	2.02575	2.46301	8.24635	4.86323	3.70374	0.00862347	1.42358	up		Ovis_aries_newGene_68043	1.10707	1.08227	0.323474	0.431393	0.334935	0.0483802	-1.59919	down		ENSOARG00000019542	0.539703	0.609591	0.610668	1.29663	0.931587	1.27336	0.0272934	1.00959	up		ENSOARG00000020562	5.91558	6.43234	5.36089	3.54494	2.11928	3.09936	0.00475518	-1.00962	down
ENSOARG00000012348	3.76381	3.18348	2.96659	7.0628	7.21994	7.50503	0.00660196	1.0945	up		Ovis_aries_newGene_68857	0.393838	0.925579	0.0634391	0.021151	0.0170786	0.000569135	-4.27607	down		ENSOARG00000019730	0	0	0.208557	2.24845	0.85674	1.29709	0.000352263	4.36119	up		ENSOARG00000020743	2.61654	2.67407	1.52036	7.70715	3.29992	6.35561	0.00534924	1.35549	up
ENSOARG00000012363	1.17042	3.83113	1.488	0.496343	0.0348387	0.0281308	0.00448369	-3.56016	down		Ovis_aries_newGene_69212	53.5479	24.5346	76.2532	79.6734	109.07	0.00184362	1.16539	up		ENSOARG00000019774	0.0595709	0.121353	0.115666	0.610774	0.47515	0.465878	0.0177468	2.39992	up		ENSOARG00000020789	46.1706	52.4826	40.5775	131.923	87.7636	85.1141	0.000338467	1.13685	up
ENSOARG00000012370	0.914373	0.867913	1.03893	2.27516	3.06445	6.93488	0.0152328	2.07467	up		Ovis_aries_newGene_70696	15.4115	9.34825	4.79336	6.25749	4.10756	0.00242975	-1.30196	down		ENSOARG00000019776	0.870209	0.655012	0.406532	1.91189	0.939381	3.38922	0.0294104	1.71934	up		ENSOARG00000020909	1.51592	1.13553	1.66184	0.721423	0.374715	0.613311	0.00947088	-1.3279	down
ENSOARG00000012378	9.22307	5.29474	9.69521	3.80677	4.35329	4.25773	0.00347305	-1.00584	down		Ovis_aries_newGene_70802	9.68276	6.3007	3.17106	1.99233	3.67275	0.000796592	-1.44909	down		ENSOARG00000019779	2.73539	1.74714	4.08026	1.71538	1.11052	1.18364	0.0498622	-1.08549	down		ENSOARG00000020943	3.17443	1.10546	2.16129	0.392877	0.471555	0.93075	0.00657571	-1.84099	down
ENSOARG00000012437	3.22058	3.64239	3.11958	8.48893	4.27278	9.43615	0.008055	1.11241	up		Ovis_aries_newGene_71441	5.35596	8.79987	2.63361	0.363336	4.84074	0.0450932	-1.44523	down		ENSOARG00000019787	0.182684	0	0.851304	1.37356	1.24897	2.18506	0.0184721	2.19047	up		ENSOARG00000020949	0.256924	0.470128	0.561472	0.103198	0.0458757	0.111128	0.0499956	-2.30346	down
ENSOARG00000012438	10.6876	12.8929	10.4899	35.4341	19.2242	60.3254	0.0139848	1.71179	up		Ovis_aries_newGene_7153	1.60121	0.528838	0.177877	0.166054	0.0191546	0.0117979	-3.14193	down		ENSOARG00000019830	1.1671	1.04158	0.863282	2.94169	1.88398	2.38028	0.0357326	1.25545	up		ENSOARG00000020972	0	0.050979	0.306675	8.70334	5.53922	17.0543	2.2338e-07	6.4562	up
ENSOARG00000012472	0.0950171	0.057864	0.0630254	1.71356	1.17656	1.55293	1.57897e-07	4.32226	up		Ovis_aries_newGene_71738	5.80085	0	13.3789	6.96702	9.60465	0.0496885	1.77019	up		ENSOARG00000019840	0.82767	0.195297	0.471568	1.14676	1.66954	1.5539	0.0141419	1.57255	up		ENSOARG00000020973	1.43202	2.82589	2.48924	0.602587	0.401812	0.270372	0.0148553	-2.39644	down
[truncated: 392 more rows]

## Sheet: DE lncRNA liver
Supplementary Table S6C.
[truncated: 31 more rows]

## Sheet: DE lncRNA Lung
Supplementary Table S6D.
[truncated: 45 more rows]

## Sheet: Supplementary Table 6E
Supplementary Table S6E.
[truncated: 6 more rows]
